# Supplementary material for: Genome-wide Association Studies Identify Quantitative Trait Loci Affecting Cattle Temperament
Source: Research Square preprint supplement (doi:10.21203/rs.3.rs-107748/v1), 2020-11-19
Supplement: Supplementary file 1 [file 8d72b2682996227364ea5398.xlsx]

## Sheet: SNP for OFT in Yunling
Chromosome	Position	LHO	UFO	VFO	LFO	HFO	POO	MHO	HSO	PNO	RMO	APO	FDO	STE	ACT	VOC	PC1	Func.refGene	Gene.refGene
1	572893	NS	NS	NS	NS	8.43621e-07	7.74184e-07	NS	NS	NS	NS	NS	NS	NS	NS	NS	NS	intronic	LOC618212
1	630083	NS	NS	4.99564e-07	NS	NS	NS	NS	NS	NS	NS	NS	NS	NS	NS	NS	NS	intergenic	LOC618212,CLIC6
1	630086	NS	NS	8.24818e-07	NS	NS	NS	NS	NS	NS	NS	NS	NS	NS	NS	NS	NS	intergenic	LOC618212,CLIC6
1	24967883	NS	NS	9.56158e-07	NS	NS	NS	NS	NS	NS	NS	NS	NS	NS	NS	NS	NS	intronic	ROBO2
1	38612282	NS	NS	NS	NS	NS	NS	NS	NS	NS	NS	NS	NS	NS	NS	3.34631e-08	NS	intergenic	NSUN3,NONE
1	38612284	NS	NS	NS	NS	NS	NS	NS	NS	NS	NS	NS	NS	NS	NS	3.34631e-08	NS	intergenic	NSUN3,NONE
1	54350404	3.69266e-07	NS	NS	NS	NS	NS	NS	NS	NS	NS	NS	NS	NS	NS	NS	NS	intergenic	DPPA4,TRNAE-UUC
1	58414205	NS	NS	NS	NS	NS	NS	NS	5.05624e-07	NS	NS	NS	NS	NS	NS	NS	NS	intronic	NAA50
1	58417088	NS	NS	NS	NS	NS	NS	NS	8.6304e-07	NS	NS	NS	NS	NS	NS	NS	NS	intronic	NAA50
1	60339395	NS	NS	NS	NS	NS	NS	NS	NS	4.36315e-08	NS	NS	NS	NS	NS	NS	NS	intronic	GAP43
1	60341273	NS	NS	NS	NS	NS	NS	NS	NS	7.94668e-07	NS	NS	NS	NS	NS	NS	NS	intronic	GAP43
1	73965050	NS	NS	NS	NS	NS	NS	4.49305e-08	NS	NS	NS	NS	NS	NS	NS	NS	NS	intronic	ATP13A4
1	74711696	NS	NS	NS	7.84509e-07	4.96807e-07	5.99174e-07	NS	NS	NS	NS	NS	NS	NS	NS	NS	NS	intronic	FGF12
1	79916674	NS	NS	5.0878e-07	NS	NS	NS	NS	NS	NS	NS	NS	NS	NS	NS	NS	NS	upstream	RTP4
1	79967840	NS	NS	NS	NS	NS	NS	NS	NS	NS	NS	9.56813e-07	NS	NS	NS	NS	NS	intergenic	RTP4,MASP1
1	91305547	NS	9.10137e-07	NS	NS	NS	NS	NS	NS	NS	NS	NS	NS	NS	NS	NS	NS	intergenic	TBL1XR1,NAALADL2
1	91305548	NS	9.10137e-07	NS	NS	NS	NS	NS	NS	NS	NS	NS	NS	NS	NS	NS	NS	intergenic	TBL1XR1,NAALADL2
1	100518610	NS	3.12354e-07	NS	1.2229e-07	6.8117e-07	2.07081e-07	NS	NS	NS	NS	NS	NS	NS	NS	NS	NS	intergenic	ZBBX,BCHE
1	101953639	NS	NS	NS	NS	NS	NS	NS	NS	NS	NS	1.8004e-07	NS	NS	NS	NS	3.71799e-07	intergenic	BCHE,SLITRK3
1	110331852	NS	NS	NS	4.9151e-07	NS	NS	NS	NS	NS	NS	NS	NS	NS	NS	NS	NS	intronic	VEPH1
1	112529312	NS	3.21728e-07	NS	1.79468e-07	3.26857e-07	1.06088e-07	NS	NS	NS	NS	NS	NS	NS	NS	NS	NS	intronic	MME
1	112529413	NS	6.45073e-08	7.13006e-08	9.93404e-08	5.08091e-08	1.94316e-08	NS	NS	NS	NS	NS	NS	NS	NS	NS	NS	intronic	MME
1	114384365	NS	4.46399e-07	NS	NS	NS	NS	NS	NS	NS	NS	NS	NS	NS	NS	NS	NS	intergenic	LOC100299503,RAP2B
1	114706514	NS	4.11423e-08	NS	2.28353e-07	9.76169e-08	3.29186e-08	NS	NS	NS	NS	NS	NS	NS	NS	NS	NS	intergenic	RAP2B,P2RY1
1	114972815	NS	NS	NS	4.91241e-07	NS	NS	NS	NS	NS	NS	2.13237e-07	NS	NS	NS	NS	NS	intergenic	P2RY1,MBNL1
1	115010558	NS	NS	NS	NS	NS	NS	NS	NS	NS	NS	1.42115e-07	NS	NS	NS	NS	NS	intergenic	P2RY1,MBNL1
1	115010567	NS	NS	NS	8.24283e-07	NS	NS	NS	NS	NS	NS	4.02489e-08	NS	NS	NS	NS	4.91103e-07	intergenic	P2RY1,MBNL1
1	115017492	NS	NS	NS	NS	NS	NS	NS	NS	NS	NS	4.40242e-07	NS	NS	NS	NS	NS	intergenic	P2RY1,MBNL1
1	115038771	NS	NS	NS	1.95545e-07	7.57432e-07	7.54516e-07	NS	NS	NS	NS	4.6589e-07	NS	NS	NS	NS	6.06624e-07	intergenic	P2RY1,MBNL1
1	115695120	NS	1.20228e-07	NS	NS	NS	NS	NS	NS	NS	NS	NS	NS	NS	NS	NS	NS	intergenic	MBNL1,MIR1246
1	117242621	NS	NS	NS	NS	NS	NS	NS	NS	NS	6.54444e-10	9.28949e-07	NS	NS	NS	NS	7.25158e-07	intronic	MINDY4B
1	117242627	NS	NS	NS	NS	NS	NS	NS	NS	NS	8.12845e-10	1.17717e-07	NS	NS	NS	NS	8.08575e-07	intronic	MINDY4B
1	117242786	NS	NS	NS	NS	NS	NS	NS	NS	NS	4.42864e-07	NS	NS	NS	NS	NS	NS	intronic	MINDY4B
1	117253440	NS	NS	NS	NS	NS	NS	NS	NS	NS	3.74786e-08	NS	NS	NS	NS	NS	NS	intronic	MINDY4B
1	122819623	NS	NS	NS	6.84908e-07	NS	NS	NS	NS	NS	NS	NS	NS	NS	NS	NS	NS	intergenic	PLOD2,C1H3orf58
1	127556353	NS	NS	NS	NS	3.82939e-07	8.99492e-07	NS	NS	NS	NS	NS	NS	NS	NS	NS	NS	intronic	ZBTB38
1	128711804	NS	NS	NS	NS	NS	NS	NS	NS	NS	NS	NS	NS	4.06098e-08	NS	NS	NS	intronic	CLSTN2
1	137171595	NS	NS	3.87154e-07	NS	NS	NS	NS	NS	NS	NS	NS	NS	NS	NS	NS	NS	intronic	DNAJC13
1	137218953	NS	8.1542e-07	NS	NS	NS	6.4564e-07	NS	NS	NS	NS	NS	NS	NS	NS	NS	NS	intergenic	DNAJC13,ACPP
1	137332683	NS	4.76732e-07	NS	NS	NS	NS	NS	NS	NS	NS	NS	NS	NS	NS	NS	NS	intergenic	ACPP,TRNAC-ACA
1	142477893	NS	NS	2.77874e-07	NS	NS	NS	NS	NS	NS	NS	NS	NS	NS	NS	NS	NS	intergenic	UMODL1,ABCG1
1	142477900	NS	NS	2.77874e-07	NS	NS	NS	NS	NS	NS	NS	NS	NS	NS	NS	NS	NS	intergenic	UMODL1,ABCG1
1	144234330	NS	NS	NS	7.09644e-08	NS	NS	NS	NS	NS	NS	NS	NS	NS	NS	NS	NS	intronic	ICOSLG
1	144863349	NS	NS	NS	NS	NS	NS	NS	NS	NS	NS	NS	NS	4.0966e-07	NS	NS	NS	intergenic	FAM207A,ADARB1
1	145579892	NS	NS	NS	NS	NS	NS	NS	NS	NS	NS	NS	NS	4.174e-07	NS	NS	NS	intronic	PCBP3
1	146667821	NS	NS	NS	7.2513e-07	NS	NS	NS	NS	NS	NS	NS	NS	NS	NS	NS	NS	intergenic	TDRP,RUNX1
1	147379983	NS	NS	2.93811e-07	NS	NS	NS	NS	NS	NS	NS	NS	NS	NS	NS	NS	NS	intergenic	RUNX1,SETD4
1	152598631	NS	NS	NS	NS	NS	NS	NS	NS	NS	NS	8.69737e-07	NS	NS	NS	NS	NS	downstream	HACL1
1	152600842	NS	NS	NS	NS	NS	NS	NS	NS	NS	NS	5.50082e-07	NS	NS	NS	NS	NS	intronic	HACL1
2	1383497	NS	8.97563e-07	NS	NS	NS	NS	NS	NS	NS	NS	NS	NS	NS	NS	NS	NS	intergenic	PTPN18,AMER3
2	2135971	NS	5.64806e-09	NS	NS	NS	NS	NS	NS	NS	NS	NS	NS	NS	NS	NS	NS	intergenic	PLEKHB2,HS6ST1
2	3337072	NS	5.09696e-07	NS	NS	NS	NS	NS	NS	NS	NS	NS	NS	NS	NS	NS	NS	intergenic	PLEKHB2,HS6ST1
2	3383402	NS	2.64212e-08	NS	NS	NS	NS	NS	NS	NS	NS	NS	NS	NS	NS	NS	NS	intergenic	PLEKHB2,HS6ST1
2	3383440	NS	4.42281e-08	NS	NS	NS	NS	NS	NS	NS	NS	NS	NS	NS	NS	NS	NS	intergenic	PLEKHB2,HS6ST1
2	3388267	NS	5.70333e-07	NS	NS	NS	NS	NS	NS	NS	NS	NS	NS	NS	NS	NS	NS	intergenic	PLEKHB2,HS6ST1
2	3400088	NS	3.2652e-07	NS	NS	NS	NS	NS	NS	NS	NS	NS	NS	NS	NS	NS	NS	intergenic	PLEKHB2,HS6ST1
2	3400145	NS	3.63327e-07	NS	NS	NS	NS	NS	NS	NS	NS	NS	NS	NS	NS	NS	NS	intergenic	PLEKHB2,HS6ST1
2	3486149	NS	9.37007e-07	NS	NS	NS	NS	NS	NS	NS	NS	NS	NS	NS	NS	NS	NS	intergenic	PLEKHB2,HS6ST1
2	3492557	NS	1.94446e-07	NS	NS	NS	NS	NS	NS	NS	NS	NS	NS	NS	NS	NS	NS	intergenic	PLEKHB2,HS6ST1
2	3505739	NS	5.24507e-07	NS	NS	NS	NS	NS	NS	NS	NS	NS	NS	NS	NS	NS	NS	intergenic	PLEKHB2,HS6ST1
2	3505745	NS	5.24507e-07	NS	NS	NS	NS	NS	NS	NS	NS	NS	NS	NS	NS	NS	NS	intergenic	PLEKHB2,HS6ST1
2	3510530	NS	7.39357e-07	NS	NS	NS	NS	NS	NS	NS	NS	NS	NS	NS	NS	NS	NS	intergenic	PLEKHB2,HS6ST1
2	7542981	NS	NS	9.84622e-07	NS	NS	NS	NS	NS	NS	NS	NS	NS	NS	NS	NS	NS	intergenic	COL3A1,DIRC1
2	7768793	NS	3.28522e-07	NS	NS	NS	NS	NS	NS	NS	NS	NS	NS	NS	NS	NS	NS	intergenic	DIRC1,GULP1
2	9897134	NS	2.63543e-07	NS	NS	NS	NS	NS	NS	NS	NS	NS	NS	NS	NS	NS	NS	intergenic	ZC3H15,FSIP2
2	11770677	NS	5.59679e-07	NS	2.98273e-07	2.47392e-08	4.68032e-08	NS	NS	NS	NS	NS	NS	NS	NS	NS	NS	intronic	ZNF804A
2	12361232	NS	NS	5.91762e-07	NS	NS	NS	NS	NS	NS	NS	NS	NS	NS	NS	NS	NS	intergenic	ZNF804A,TRNAC-GCA
2	17198573	NS	3.22569e-07	NS	1.90981e-08	5.22122e-09	2.03117e-08	NS	NS	NS	7.59121e-08	8.18808e-10	NS	NS	NS	NS	2.76116e-09	intronic	ZNF385B
2	20535693	NS	NS	NS	NS	NS	NS	NS	NS	NS	NS	NS	NS	NS	6.17834e-07	NS	NS	intergenic	HNRNPA3,MTX2
2	28779911	NS	NS	NS	2.15619e-07	3.13809e-07	2.5381e-07	NS	NS	NS	NS	NS	NS	NS	NS	NS	NS	intronic	B3GALT1
2	32851718	NS	NS	NS	NS	NS	NS	NS	NS	NS	NS	NS	NS	7.4676e-07	NS	NS	NS	intergenic	FIGN,LOC107132260
2	32930308	NS	NS	NS	NS	NS	NS	NS	NS	NS	NS	NS	NS	5.06603e-07	NS	NS	NS	intergenic	FIGN,LOC107132260
2	32930329	NS	NS	NS	NS	NS	NS	NS	NS	NS	NS	NS	NS	2.88558e-07	NS	NS	NS	intergenic	FIGN,LOC107132260
2	33457027	NS	NS	NS	NS	NS	NS	NS	NS	NS	NS	NS	NS	5.10222e-08	NS	NS	NS	intergenic	FIGN,LOC107132260
2	36269549	NS	NS	NS	NS	NS	NS	NS	NS	NS	NS	NS	NS	3.1862e-07	NS	NS	NS	intronic	PLA2R1
2	36474269	NS	NS	NS	NS	NS	NS	NS	NS	NS	NS	NS	NS	8.59464e-08	NS	NS	NS	intronic	LY75
2	36618073	NS	NS	NS	NS	NS	NS	NS	NS	NS	NS	NS	NS	9.74763e-07	NS	NS	NS	intronic
2	37162995	NS	NS	NS	NS	NS	NS	NS	NS	NS	NS	NS	NS	8.7902e-07	NS	NS	NS	intronic	TANC1
2	37550394	NS	NS	NS	NS	NS	NS	NS	NS	NS	NS	NS	NS	6.40832e-07	NS	NS	NS	intergenic	TRNAC-GCA,PKP4
2	38844982	NS	NS	NS	NS	NS	NS	NS	NS	NS	NS	NS	NS	8.35502e-07	NS	NS	NS	intergenic	ACVR1C,CYTIP
2	38927961	NS	NS	NS	NS	NS	NS	NS	NS	NS	NS	NS	NS	3.02003e-07	NS	NS	NS	intronic	CYTIP
2	46273631	NS	NS	NS	NS	NS	NS	NS	NS	NS	NS	NS	NS	2.12542e-07	NS	NS	NS	intergenic	RND3,MMADHC
2	54658249	NS	NS	NS	NS	NS	NS	NS	NS	NS	NS	4.96381e-07	5.60398e-08	NS	NS	NS	NS	intergenic	KYNU,TRNAC-GCA
2	54906855	NS	NS	NS	NS	9.44776e-07	NS	NS	NS	NS	NS	NS	NS	NS	NS	NS	NS	intergenic	KYNU,TRNAC-GCA
2	81718115	NS	NS	NS	NS	NS	9.88765e-07	NS	NS	NS	NS	NS	NS	NS	NS	NS	NS	intergenic	TMEFF2,NONE
2	83684923	NS	9.45143e-07	NS	NS	NS	NS	NS	NS	NS	NS	NS	NS	NS	NS	NS	NS	intergenic	NONE,SLC39A10
2	83710396	NS	5.40112e-07	NS	NS	9.2632e-07	5.92746e-07	NS	NS	NS	NS	NS	NS	NS	NS	NS	NS	intergenic	NONE,SLC39A10
2	92696231	NS	5.6294e-07	NS	5.16078e-07	NS	5.44547e-07	NS	NS	NS	NS	NS	NS	NS	NS	NS	NS	intergenic	ICOS,LOC112442244
2	93205291	NS	6.86961e-07	NS	NS	6.03804e-07	4.73189e-07	NS	NS	NS	NS	NS	NS	NS	NS	NS	NS	intronic	PARD3B
2	93208910	NS	9.90745e-07	NS	6.90748e-07	2.30234e-07	2.14972e-07	NS	NS	NS	NS	NS	NS	NS	NS	NS	NS	intronic	PARD3B
2	93208980	NS	1.65799e-07	NS	2.83947e-07	2.8356e-08	3.74851e-08	NS	NS	NS	NS	NS	NS	NS	NS	NS	NS	intronic	PARD3B
2	93222682	NS	5.44536e-07	NS	NS	4.56165e-07	3.42096e-07	NS	NS	NS	NS	NS	NS	NS	NS	NS	NS	intronic	PARD3B
2	93273156	NS	NS	NS	NS	7.98453e-07	7.80936e-07	NS	NS	NS	NS	NS	NS	NS	NS	NS	NS	intronic	PARD3B
2	93273291	NS	NS	NS	NS	5.38822e-07	7.64828e-07	NS	NS	NS	NS	NS	NS	NS	NS	NS	NS	intronic	PARD3B
2	93275093	NS	5.61725e-08	NS	6.58807e-08	5.20139e-09	7.59542e-09	NS	NS	NS	NS	NS	NS	NS	NS	NS	NS	intronic	PARD3B
2	93654462	NS	3.29049e-07	NS	NS	NS	8.77738e-07	NS	NS	NS	NS	NS	NS	NS	NS	NS	NS	intronic	PARD3B
2	93967763	NS	2.59842e-08	NS	NS	2.15045e-07	6.58962e-08	NS	NS	NS	NS	NS	NS	NS	NS	NS	NS	intergenic	PARD3B,NRP2
2	94025503	NS	2.45067e-07	NS	NS	NS	NS	NS	NS	NS	NS	NS	NS	NS	NS	NS	NS	intergenic	PARD3B,NRP2
2	94924742	NS	1.44484e-07	NS	4.82717e-07	6.83619e-07	2.42597e-07	NS	NS	NS	NS	NS	NS	NS	NS	NS	NS	intergenic	ADAM23,FAM237A
2	95172455	NS	2.57173e-07	NS	5.49844e-07	1.2391e-07	1.04596e-07	NS	NS	NS	NS	NS	NS	NS	NS	NS	NS	intergenic	FASTKD2,CPO
2	95177443	NS	5.75532e-08	NS	3.89759e-07	NS	2.95058e-07	NS	NS	NS	NS	NS	NS	NS	NS	NS	NS	intergenic	FASTKD2,CPO
2	95405699	NS	7.42917e-08	NS	NS	NS	NS	NS	NS	NS	NS	NS	NS	NS	NS	NS	NS	intronic	KLF7
2	96473349	NS	7.6969e-07	NS	2.93415e-07	2.01107e-07	1.94674e-07	NS	NS	NS	NS	NS	NS	NS	NS	NS	NS	intergenic	C2H2orf80,IDH1
2	98958292	NS	NS	NS	NS	NS	NS	NS	NS	NS	NS	NS	NS	3.91024e-07	7.53766e-07	NS	NS	intergenic	CPS1,TRNAC-GCA
2	99134812	NS	NS	NS	2.19528e-07	NS	NS	NS	NS	NS	NS	NS	NS	NS	NS	NS	NS	intergenic	CPS1,TRNAC-GCA
2	99134813	NS	NS	NS	2.19528e-07	NS	NS	NS	NS	NS	NS	NS	NS	NS	NS	NS	NS	intergenic	CPS1,TRNAC-GCA
2	99134847	NS	NS	NS	1.09909e-08	6.4735e-07	2.94311e-07	NS	NS	NS	NS	2.8483e-07	NS	NS	NS	NS	5.93279e-07	intergenic	CPS1,TRNAC-GCA
2	99192001	NS	NS	NS	6.84642e-07	NS	NS	NS	NS	NS	NS	7.99915e-07	NS	NS	NS	NS	NS	intergenic	CPS1,TRNAC-GCA
2	102204217	NS	NS	NS	2.15445e-07	NS	NS	NS	NS	NS	NS	NS	NS	NS	NS	NS	NS	intronic	SPAG16
2	103466702	NS	NS	NS	NS	NS	NS	NS	NS	NS	NS	8.45733e-08	5.87137e-07	NS	NS	NS	NS	intergenic	FN1,MREG
2	105125755	NS	NS	NS	NS	NS	NS	NS	NS	4.00258e-08	NS	NS	NS	NS	NS	NS	NS	intergenic	TNP1,TRNAC-ACA
2	111399592	NS	NS	1.88772e-07	NS	NS	NS	NS	NS	NS	NS	NS	NS	NS	NS	NS	NS	intergenic	KCNE4,SCG2
2	113928927	NS	NS	NS	NS	NS	NS	NS	NS	NS	NS	7.70242e-07	NS	NS	NS	NS	NS	intergenic	NYAP2,IRS1
2	117615274	NS	7.69831e-07	NS	1.35063e-07	NS	4.25905e-07	NS	NS	NS	NS	NS	NS	NS	NS	NS	NS	intronic	DNER
2	117615302	NS	1.88641e-08	NS	5.90251e-09	4.64241e-09	3.32584e-09	NS	NS	NS	NS	NS	NS	NS	NS	NS	NS	intronic	DNER
2	126560627	NS	NS	1.22687e-07	NS	NS	NS	NS	NS	NS	NS	NS	NS	NS	NS	NS	NS	intergenic	ARID1A,RPS6KA1
2	126740756	NS	NS	8.25055e-07	NS	NS	NS	NS	NS	NS	NS	NS	NS	NS	NS	NS	NS	intergenic	LIN28A,ZNF683
2	127749146	NS	NS	5.18128e-07	NS	NS	NS	NS	NS	NS	NS	NS	NS	NS	NS	NS	NS	intergenic	SYF2,RUNX3
2	131541342	NS	NS	8.94577e-07	NS	NS	NS	NS	NS	NS	NS	NS	NS	NS	NS	NS	NS	intronic	EIF4G3
2	131957270	NS	NS	NS	1.59834e-07	5.3861e-08	8.34583e-08	NS	NS	NS	NS	NS	NS	NS	NS	NS	6.42134e-07	intronic	KIF17
2	134141088	NS	NS	NS	NS	5.13295e-07	6.0906e-07	NS	NS	NS	NS	NS	NS	NS	NS	NS	NS	intergenic	LOC536229,KLHDC7A
2	134541216	NS	NS	NS	NS	3.21474e-07	4.82126e-07	NS	NS	NS	NS	NS	NS	NS	NS	NS	3.05133e-07	intronic	IGSF21
2	134636781	9.4985e-07	NS	NS	NS	NS	NS	NS	NS	NS	NS	NS	NS	NS	NS	NS	NS	intergenic	IGSF21,ACTL8
2	135129847	NS	NS	4.8533e-07	NS	NS	NS	NS	NS	NS	NS	NS	NS	NS	NS	NS	NS	intronic	ARHGEF10L
2	135398985	NS	7.75753e-07	NS	NS	6.8206e-07	3.59502e-07	NS	NS	NS	NS	NS	NS	NS	NS	NS	NS	intergenic	PADI1,PADI2
2	135533777	NS	6.84427e-07	NS	NS	2.27125e-07	1.73537e-07	NS	NS	NS	NS	NS	NS	NS	NS	NS	NS	intergenic	PADI2,SDHB
3	3311172	NS	6.48218e-08	NS	5.34932e-08	1.86927e-07	4.51935e-08	NS	NS	NS	NS	NS	NS	NS	NS	NS	NS	intergenic	MGST3,LRRC52
3	7336228	NS	NS	NS	NS	NS	NS	NS	NS	NS	NS	NS	NS	NS	6.02192e-07	NS	NS	intronic	NOS1AP
3	10025022	NS	NS	NS	NS	NS	NS	NS	NS	NS	NS	4.58453e-07	NS	NS	NS	NS	NS	intergenic	CRP,APCS
3	11850352	NS	NS	NS	NS	8.62537e-07	NS	NS	NS	NS	NS	NS	NS	NS	NS	NS	NS	intergenic	LOC781726,CD1A
3	22803904	NS	NS	NS	NS	NS	NS	NS	NS	NS	NS	NS	NS	NS	NS	NS	7.2313e-07	intergenic	LOC112445957,PDE4DIP
3	22803911	NS	NS	NS	NS	NS	NS	NS	NS	NS	NS	NS	NS	NS	NS	NS	2.89105e-07	intergenic	LOC112445957,PDE4DIP
3	23518311	NS	NS	NS	NS	NS	NS	NS	NS	NS	NS	NS	NS	NS	NS	NS	2.77298e-07	intergenic	REG4,HMGCS2
3	25194080	NS	4.3102e-07	5.99276e-07	NS	NS	NS	NS	NS	NS	NS	NS	NS	NS	NS	NS	NS	intronic	SPAG17
3	25194359	NS	5.5214e-09	NS	NS	NS	NS	NS	NS	NS	NS	NS	NS	NS	NS	NS	NS	intronic	SPAG17
3	25194367	NS	5.88498e-08	NS	NS	NS	NS	NS	NS	NS	NS	NS	NS	NS	NS	NS	NS	intronic	SPAG17
3	25625931	NS	NS	NS	NS	NS	NS	NS	NS	1.52669e-07	NS	NS	NS	NS	NS	NS	NS	intergenic	TENT5C,MAN1A2
3	25982323	NS	NS	NS	NS	NS	NS	NS	NS	NS	NS	3.90186e-07	NS	NS	NS	NS	NS	intergenic	TRNAE-UUC,VTCN1
3	26325670	NS	8.80655e-09	2.10069e-07	NS	9.09972e-07	6.92712e-08	NS	NS	NS	NS	NS	NS	NS	NS	NS	4.36007e-07	intronic	PTGFRN
3	26340713	NS	5.7625e-07	NS	NS	NS	NS	NS	NS	NS	NS	NS	NS	NS	NS	NS	NS	intergenic	PTGFRN,CD2
3	26369043	NS	8.43194e-08	1.03193e-08	7.03528e-07	NS	1.25669e-07	NS	NS	NS	5.04053e-08	1.9466e-07	7.18959e-07	NS	NS	NS	1.48953e-08	intergenic	PTGFRN,CD2
3	26373772	NS	4.93161e-08	3.85715e-08	NS	NS	2.06541e-07	NS	NS	NS	NS	NS	NS	NS	NS	NS	4.39845e-08	intergenic	PTGFRN,CD2
3	26430997	NS	5.98674e-08	2.97425e-08	NS	1.25672e-07	3.17225e-08	NS	NS	NS	NS	NS	NS	NS	NS	NS	NS	intergenic	PTGFRN,CD2
3	26433360	NS	3.40516e-07	NS	NS	NS	8.41098e-07	NS	NS	NS	NS	NS	NS	NS	NS	NS	NS	intergenic	PTGFRN,CD2
3	31982092	NS	NS	NS	7.74698e-09	7.40744e-08	8.28729e-08	NS	NS	NS	NS	NS	NS	NS	NS	NS	NS	intronic	LOC100138271
3	32521701	NS	NS	NS	NS	NS	NS	NS	NS	NS	NS	NS	6.88749e-07	NS	NS	NS	NS	intronic	CD53
3	32521702	NS	NS	NS	NS	NS	NS	NS	NS	NS	NS	NS	6.88749e-07	NS	NS	NS	NS	intronic	CD53
3	32693114	NS	NS	NS	NS	NS	NS	NS	NS	NS	NS	9.85933e-07	NS	NS	NS	NS	5.36114e-07	intergenic	CD53,TRNAK-UUU
3	34068354	NS	8.97535e-07	NS	9.57492e-08	4.61286e-08	7.6451e-08	NS	NS	NS	1.46691e-07	1.6525e-08	NS	NS	NS	NS	6.81254e-08	intronic	SORT1
3	34289704	NS	NS	NS	3.22184e-07	NS	NS	NS	NS	NS	NS	NS	NS	NS	NS	NS	NS	intronic	TMEM167B
3	36119273	NS	NS	NS	NS	NS	NS	NS	NS	NS	NS	7.3864e-07	NS	NS	NS	NS	NS	intronic	NTNG1
3	37584359	NS	NS	8.09804e-07	NS	NS	NS	NS	NS	NS	NS	NS	NS	NS	NS	NS	NS	intergenic	TRNAC-GCA,NONE
3	39522933	NS	NS	3.5756e-08	NS	NS	NS	NS	NS	NS	NS	NS	NS	NS	NS	NS	NS	intergenic	NONE,LOC539383
3	39538984	NS	NS	2.58597e-08	NS	NS	NS	NS	NS	NS	NS	NS	NS	NS	NS	NS	NS	intergenic	NONE,LOC539383
3	39559373	NS	1.88664e-07	3.52333e-07	NS	NS	3.03568e-07	NS	NS	NS	NS	NS	NS	NS	NS	NS	7.61435e-07	intergenic	NONE,LOC539383
3	39562407	NS	9.53704e-12	1.21717e-10	2.17923e-11	4.66879e-12	1.07839e-12	NS	NS	NS	3.33273e-12	7.52281e-09	NS	NS	NS	NS	2.43861e-11	intergenic	NONE,LOC539383
3	39566800	NS	4.84708e-10	NS	6.21628e-10	5.41732e-10	2.38638e-10	NS	NS	NS	1.5968e-09	2.38996e-10	NS	NS	NS	NS	2.72903e-11	intergenic	NONE,LOC539383
3	39581617	NS	NS	9.37848e-07	NS	NS	NS	NS	NS	NS	NS	NS	NS	NS	NS	NS	NS	intergenic	NONE,LOC539383
3	39585629	NS	2.44339e-07	NS	6.85039e-08	1.83614e-09	9.32168e-09	NS	NS	NS	1.44351e-11	2.65576e-11	NS	NS	NS	NS	9.31193e-10	intergenic	NONE,LOC539383
3	39628202	NS	6.69391e-10	2.64813e-07	5.36345e-08	3.10504e-09	8.95939e-10	NS	NS	NS	3.06553e-07	NS	NS	NS	NS	NS	5.13984e-07	intergenic	NONE,LOC539383
3	39635832	NS	NS	NS	NS	NS	NS	NS	NS	NS	NS	NS	NS	NS	NS	9.10032e-07	NS	intergenic	NONE,LOC539383
3	40588372	NS	5.68369e-07	NS	NS	NS	NS	NS	NS	NS	NS	NS	NS	NS	NS	NS	NS	intergenic	COL11A1,OLFM3
3	40589624	NS	NS	NS	NS	NS	NS	NS	NS	NS	NS	3.1548e-08	NS	NS	NS	NS	1.20851e-07	intergenic	COL11A1,OLFM3
3	40589928	NS	4.39066e-07	3.80754e-07	NS	NS	4.85618e-07	NS	NS	NS	NS	2.11733e-07	NS	NS	NS	NS	8.9831e-08	intergenic	COL11A1,OLFM3
3	40604796	NS	3.61019e-08	NS	NS	NS	NS	NS	NS	NS	NS	NS	NS	NS	NS	NS	NS	intergenic	COL11A1,OLFM3
3	42191734	NS	9.96344e-07	NS	NS	NS	NS	NS	NS	NS	NS	NS	NS	NS	NS	NS	NS	intergenic	S1PR1,DPH5
3	42807111	NS	NS	NS	NS	NS	NS	NS	NS	NS	8.59142e-07	NS	NS	NS	NS	NS	8.2057e-07	intronic	CDC14A
3	42821620	NS	NS	NS	1.02834e-07	4.39102e-07	2.0587e-07	NS	NS	NS	NS	NS	NS	NS	NS	NS	7.62632e-07	intronic	CDC14A
3	42825571	NS	NS	NS	4.07168e-07	NS	NS	NS	NS	NS	NS	NS	NS	NS	NS	NS	NS	intronic	CDC14A
3	42847891	NS	NS	NS	NS	NS	7.2335e-07	NS	NS	NS	NS	NS	NS	NS	NS	NS	8.54447e-07	intronic	CDC14A
3	42859310	NS	7.80176e-07	NS	4.07592e-07	7.23098e-07	2.20186e-07	NS	NS	NS	NS	NS	NS	NS	NS	NS	4.94209e-07	intronic	CDC14A
3	42859359	NS	NS	NS	NS	NS	9.19673e-07	NS	NS	NS	NS	NS	NS	NS	NS	NS	8.07858e-07	intronic	CDC14A
3	42864300	NS	NS	NS	NS	NS	8.69916e-07	NS	NS	NS	NS	NS	NS	NS	NS	NS	6.36913e-07	intronic	CDC14A
3	42864592	NS	NS	NS	9.89016e-07	NS	7.55494e-07	NS	NS	NS	NS	NS	NS	NS	NS	NS	NS	intronic	CDC14A
3	44122952	NS	NS	NS	NS	NS	NS	NS	NS	NS	NS	NS	NS	NS	NS	NS	5.45779e-07	intergenic	PLPPR4,PLPPR5
3	44123032	NS	NS	NS	8.17804e-08	NS	5.12491e-07	NS	NS	NS	NS	3.27007e-07	NS	NS	NS	NS	1.49148e-07	intergenic	PLPPR4,PLPPR5
3	45132466	NS	NS	4.23843e-07	NS	NS	NS	NS	NS	NS	NS	NS	NS	NS	NS	NS	NS	intergenic	SNX7,MIR137
3	45132484	NS	NS	7.95585e-07	NS	NS	NS	NS	NS	NS	NS	NS	NS	NS	NS	NS	NS	intergenic	SNX7,MIR137
3	45132495	NS	NS	2.46865e-07	NS	NS	NS	NS	NS	NS	NS	NS	NS	NS	NS	NS	NS	intergenic	SNX7,MIR137
3	47742469	NS	NS	3.42927e-07	NS	NS	NS	NS	NS	NS	NS	NS	NS	NS	NS	NS	NS	intergenic	PTBP2,RWDD3
3	48188382	NS	NS	7.0023e-07	NS	NS	NS	NS	NS	NS	NS	NS	NS	NS	NS	NS	NS	intergenic	PTBP2,RWDD3
3	52890867	NS	NS	2.52785e-07	NS	NS	NS	NS	NS	NS	NS	NS	NS	NS	NS	NS	NS	intergenic	BARHL2,TRNAC-GCA
3	52890889	NS	NS	9.8063e-07	NS	NS	NS	NS	NS	NS	NS	NS	NS	NS	NS	NS	NS	intergenic	BARHL2,TRNAC-GCA
3	54132362	NS	9.51929e-07	6.86465e-07	NS	NS	NS	NS	NS	NS	NS	NS	NS	NS	NS	NS	NS	intergenic	GBP5,LOC512486
3	54132369	NS	NS	5.79115e-07	NS	NS	NS	NS	NS	NS	NS	NS	NS	NS	NS	NS	NS	intergenic	GBP5,LOC512486
3	55822622	NS	NS	NS	NS	NS	NS	NS	NS	NS	NS	NS	4.94375e-07	NS	NS	NS	NS	intergenic	PKN2,TRNAD-GUC
3	63743219	NS	NS	NS	NS	NS	NS	NS	NS	NS	NS	NS	NS	NS	NS	6.05027e-07	NS	intergenic	TRNAC-ACA,ADGRL4
3	80004897	NS	NS	NS	NS	NS	NS	NS	NS	NS	NS	NS	2.53976e-07	NS	NS	NS	NS	intronic	DNAJC6
3	80194726	NS	NS	NS	NS	NS	NS	NS	NS	NS	NS	NS	2.59131e-07	NS	NS	NS	NS	intronic	AK4
3	85635138	NS	NS	NS	NS	NS	NS	NS	NS	NS	NS	NS	NS	NS	2.17823e-07	NS	NS	intergenic	NFIA,C3H1orf87
3	85654881	NS	NS	NS	1.28787e-07	NS	NS	NS	NS	NS	NS	NS	NS	NS	NS	NS	NS	intergenic	NFIA,C3H1orf87
3	85688134	NS	NS	NS	NS	NS	NS	NS	NS	NS	NS	NS	NS	NS	2.37848e-07	NS	NS	intergenic	NFIA,C3H1orf87
3	85718091	NS	NS	NS	NS	NS	NS	NS	NS	NS	NS	NS	NS	2.65543e-07	NS	NS	NS	intronic	C3H1orf87
3	85720093	NS	NS	NS	NS	NS	NS	NS	NS	NS	NS	NS	NS	5.19628e-07	NS	NS	NS	intronic	C3H1orf87
3	87077609	NS	5.45023e-08	NS	6.68747e-07	8.30455e-08	4.76507e-08	NS	NS	NS	NS	NS	NS	NS	NS	NS	NS	intergenic	FGGY,TRNAG-CCC
3	87703843	NS	NS	NS	NS	NS	NS	NS	NS	NS	NS	NS	NS	5.65062e-07	NS	NS	NS	intergenic	OMA1,DAB1
3	93192584	NS	6.72293e-08	1.62189e-08	3.58412e-07	NS	8.5029e-07	NS	NS	NS	NS	NS	NS	NS	NS	NS	NS	intergenic	PODN,SCP2
3	94239145	NS	NS	NS	3.01266e-07	NS	NS	NS	NS	NS	NS	NS	NS	NS	NS	NS	NS	intergenic	ZFYVE9,BTF3L4
3	94239192	NS	3.42184e-07	NS	2.69838e-08	1.37172e-08	2.7457e-08	NS	NS	NS	NS	NS	NS	NS	NS	NS	NS	intergenic	ZFYVE9,BTF3L4
3	94758513	NS	6.26358e-07	NS	2.35185e-07	NS	NS	NS	NS	NS	NS	NS	NS	NS	NS	NS	2.64345e-07	intergenic	OSBPL9,EPS15
3	94927516	NS	NS	NS	5.28091e-07	NS	NS	NS	NS	NS	NS	NS	NS	NS	NS	NS	NS	intronic	EPS15
3	97824791	NS	NS	NS	2.21842e-07	NS	NS	NS	NS	NS	NS	7.52077e-07	NS	NS	NS	NS	NS	intronic	SPATA6
3	100088135	NS	NS	NS	NS	6.45432e-07	6.53612e-07	NS	NS	NS	NS	NS	NS	NS	NS	NS	NS	intronic	MAST2
3	100088253	NS	NS	NS	NS	7.6289e-07	6.54483e-07	NS	NS	NS	NS	NS	NS	NS	NS	NS	NS	intronic	MAST2
3	101571546	NS	NS	NS	NS	NS	NS	NS	NS	NS	NS	9.78686e-07	NS	NS	NS	NS	5.94951e-07	intronic	RNF220
3	102819504	NS	NS	NS	6.92528e-07	4.05268e-07	8.48885e-07	NS	NS	NS	NS	NS	NS	NS	NS	NS	NS	intronic	CFAP57
3	105835869	NS	NS	NS	5.95707e-09	3.44499e-07	1.77896e-07	NS	NS	NS	NS	NS	NS	NS	NS	NS	1.85125e-07	intronic	ZMPSTE24
3	111742420	NS	NS	NS	NS	NS	NS	NS	NS	NS	NS	NS	1.01476e-07	NS	NS	NS	NS	intronic	CSMD2
3	111758904	NS	NS	NS	NS	NS	NS	NS	NS	NS	NS	3.14157e-07	1.22461e-08	NS	NS	NS	NS	intronic	CSMD2
3	116258382	NS	NS	7.53251e-07	NS	NS	NS	NS	NS	NS	NS	NS	NS	NS	NS	NS	NS	intergenic	ACKR3,COPS8
3	116437516	NS	3.50432e-07	NS	NS	NS	NS	NS	NS	NS	NS	NS	NS	NS	NS	NS	NS	intergenic	ACKR3,COPS8
4	4671645	NS	NS	5.5138e-07	NS	NS	NS	NS	NS	NS	NS	NS	NS	NS	NS	NS	NS	intronic	COBL
4	4726974	NS	NS	9.15427e-07	NS	NS	NS	NS	NS	NS	NS	NS	NS	NS	NS	NS	NS	intronic	COBL
4	5275044	NS	NS	9.18082e-07	NS	NS	NS	NS	NS	NS	NS	NS	NS	NS	NS	NS	NS	intronic	GRB10
4	5335136	NS	NS	9.56376e-07	NS	NS	NS	NS	NS	NS	NS	NS	NS	NS	NS	NS	NS	upstream	DDC
4	5335300	NS	NS	4.26468e-07	NS	NS	NS	NS	NS	NS	NS	NS	NS	NS	NS	NS	NS	upstream	DDC
4	7075259	NS	NS	4.92157e-07	NS	NS	NS	NS	NS	NS	NS	NS	NS	NS	NS	NS	NS	intergenic	VWC2,ABCA13
4	7841705	NS	NS	7.66133e-07	NS	NS	NS	NS	NS	NS	NS	NS	NS	NS	NS	NS	NS	intergenic	CLDN12,CDK14
4	7851566	NS	NS	3.80095e-07	NS	NS	NS	NS	NS	NS	NS	NS	NS	NS	NS	NS	NS	intergenic	CLDN12,CDK14
4	7857368	NS	NS	5.33968e-08	NS	NS	NS	NS	NS	NS	NS	NS	NS	NS	NS	NS	NS	intergenic	CLDN12,CDK14
4	7904427	NS	NS	5.68047e-07	NS	NS	NS	NS	NS	NS	NS	NS	NS	NS	NS	NS	NS	intergenic	CLDN12,CDK14
4	8019707	NS	NS	1.67832e-07	NS	NS	NS	NS	NS	NS	NS	NS	NS	NS	NS	NS	NS	intronic	CDK14
4	8399058	NS	NS	6.86597e-07	NS	NS	NS	NS	NS	NS	NS	NS	NS	NS	NS	NS	NS	intronic	CDK14
4	8399451	NS	NS	9.77125e-07	NS	NS	NS	NS	NS	NS	NS	NS	NS	NS	NS	NS	NS	intronic	CDK14
4	11479493	NS	9.2204e-07	NS	NS	NS	NS	NS	NS	NS	NS	NS	NS	NS	NS	NS	NS	intergenic	BET1,COL1A2
4	14780995	NS	NS	NS	NS	3.72042e-07	NS	NS	NS	NS	NS	NS	NS	NS	NS	NS	NS	intergenic	SDHAF3,TAC1
4	18381942	NS	NS	2.84277e-07	NS	NS	NS	NS	NS	NS	NS	NS	NS	NS	NS	NS	NS	intergenic	TRNAC-GCA,NDUFA4
4	18836740	NS	NS	7.01648e-07	NS	NS	NS	NS	NS	NS	NS	NS	NS	NS	NS	NS	NS	intergenic	TRNAC-GCA,NDUFA4
4	19021037	NS	NS	6.72373e-07	NS	NS	NS	NS	NS	NS	NS	NS	NS	NS	NS	NS	NS	intergenic	TRNAC-GCA,NDUFA4
4	21816050	NS	NS	NS	NS	NS	NS	NS	NS	NS	NS	NS	5.2976e-07	NS	NS	NS	NS	intergenic	ARL4A,ETV1
4	26990027	NS	NS	NS	9.1785e-07	1.76172e-08	1.91638e-07	NS	NS	NS	NS	NS	NS	NS	NS	NS	NS	intronic	HDAC9
4	42441279	NS	NS	NS	NS	NS	NS	NS	NS	NS	NS	NS	NS	2.50314e-07	NS	NS	NS	intronic	MAGI2
4	56190539	NS	NS	6.96845e-07	NS	NS	NS	NS	NS	NS	NS	NS	NS	NS	NS	NS	NS	intronic	DOCK4
4	56579086	3.59083e-07	NS	NS	NS	NS	NS	NS	NS	NS	NS	NS	NS	NS	NS	NS	NS	intronic	DOCK4
4	62737059	8.57215e-07	NS	NS	NS	NS	NS	NS	NS	NS	NS	NS	NS	NS	NS	NS	NS	intronic	BMPER
4	63988782	9.3387e-07	NS	NS	NS	NS	NS	NS	NS	NS	NS	NS	NS	NS	NS	NS	NS	intronic	AVL9
4	65577759	NS	3.78231e-07	9.26456e-09	4.78711e-09	1.49715e-08	8.36724e-09	NS	NS	NS	NS	NS	NS	NS	NS	NS	NS	intronic	MINDY4
4	65616683	NS	NS	3.59467e-07	NS	NS	NS	NS	NS	NS	NS	NS	NS	NS	NS	NS	NS	intergenic	INMT,CRHR2
4	66112973	3.22114e-07	NS	NS	NS	NS	NS	NS	NS	NS	NS	NS	NS	NS	NS	NS	NS	intergenic	LOC107132410,MTURN
4	66113048	9.09258e-07	NS	NS	NS	NS	NS	NS	NS	NS	NS	NS	NS	NS	NS	NS	NS	intergenic	LOC107132410,MTURN
4	74943001	NS	NS	9.63143e-08	NS	NS	NS	NS	NS	NS	NS	NS	NS	NS	NS	NS	NS	intronic	TNS3
4	88856807	NS	NS	NS	NS	NS	NS	NS	NS	NS	NS	NS	NS	5.13153e-07	NS	NS	NS	intergenic	TMEM229A,GPR37
4	90458130	NS	NS	6.99445e-08	NS	NS	6.47494e-07	NS	NS	NS	NS	NS	NS	NS	NS	NS	NS	intergenic	TRNAR-ACG,GRM8
4	93079805	NS	6.79063e-07	NS	NS	NS	NS	NS	NS	NS	NS	NS	NS	NS	NS	NS	NS	intronic	TSPAN33
4	93209546	NS	8.14178e-07	NS	NS	NS	NS	NS	NS	NS	NS	NS	NS	NS	NS	NS	NS	intronic	AHCYL2
4	93243605	NS	NS	NS	3.63353e-07	3.38579e-07	2.70789e-07	NS	NS	NS	NS	NS	NS	NS	NS	NS	2.46493e-07	intronic	AHCYL2
4	93243625	NS	NS	NS	9.33606e-07	8.55077e-07	4.61113e-07	NS	NS	NS	NS	NS	NS	NS	NS	NS	6.12914e-07	intronic	AHCYL2
4	93243638	NS	NS	NS	9.33606e-07	8.55077e-07	4.61113e-07	NS	NS	NS	NS	NS	NS	NS	NS	NS	6.12914e-07	intronic	AHCYL2
4	93243676	NS	7.53897e-07	NS	3.60064e-07	3.36618e-07	1.75034e-07	NS	NS	NS	NS	NS	NS	NS	NS	NS	NS	intronic	AHCYL2
4	98928857	NS	NS	NS	8.19035e-07	NS	NS	NS	NS	NS	NS	NS	NS	NS	NS	NS	NS	intronic	LOC514257
4	101785212	NS	NS	NS	9.56853e-07	1.77201e-07	3.68622e-07	NS	NS	NS	NS	NS	NS	NS	NS	NS	NS	intronic	AKR1D1
4	103319746	NS	NS	NS	NS	NS	NS	4.79196e-07	NS	NS	NS	NS	NS	NS	NS	NS	NS	intronic	TBXAS1
4	103319760	NS	NS	NS	NS	NS	NS	4.56997e-07	NS	NS	NS	NS	NS	NS	NS	NS	NS	intronic	TBXAS1
4	105008869	NS	NS	NS	NS	NS	NS	7.77074e-07	NS	NS	NS	NS	NS	NS	NS	NS	NS	intronic	SSBP1
4	115549379	NS	NS	NS	NS	NS	NS	NS	NS	NS	NS	NS	NS	4.14931e-07	NS	NS	NS	intergenic	TRNAG-CCC,TRNAC-GCA
4	116409421	NS	NS	5.79156e-07	NS	NS	NS	NS	NS	NS	NS	NS	NS	NS	NS	NS	NS	intronic	DPP6
5	8883367	9.95382e-07	NS	NS	NS	NS	NS	NS	NS	NS	NS	NS	NS	NS	NS	NS	NS	intronic	SYT1
5	9072968	NS	NS	NS	NS	NS	NS	8.307e-07	NS	NS	NS	NS	NS	NS	NS	NS	NS	intergenic	SYT1,PAWR
5	15413462	2.12027e-07	NS	NS	NS	NS	NS	NS	NS	NS	NS	NS	NS	NS	NS	NS	NS	intergenic	ALX1,RASSF9
5	23031445	NS	NS	NS	NS	NS	NS	NS	NS	8.158e-07	NS	NS	NS	NS	NS	NS	NS	intergenic	EEA1,NUDT4
5	23271751	NS	NS	NS	NS	NS	NS	NS	NS	2.13606e-07	NS	NS	NS	NS	NS	NS	NS	intronic	MRPL42
5	32107576	NS	2.12237e-07	2.00638e-07	9.65868e-07	NS	NS	NS	NS	NS	NS	NS	NS	NS	NS	NS	NS	intergenic	OR10AD1,CCDC184
5	35730498	NS	2.29789e-08	NS	7.761e-07	7.06934e-08	4.56337e-08	NS	NS	NS	NS	NS	NS	NS	NS	NS	NS	intronic	NELL2
5	35889178	NS	NS	NS	NS	NS	NS	NS	5.4125e-07	5.16135e-07	NS	NS	NS	NS	NS	NS	NS	intergenic	NELL2,TMEM117
5	35915606	NS	NS	NS	NS	NS	NS	NS	7.91738e-07	4.03809e-07	NS	NS	NS	NS	NS	NS	NS	intergenic	NELL2,TMEM117
5	35915705	NS	NS	NS	NS	NS	NS	NS	NS	8.05453e-07	NS	NS	NS	NS	NS	NS	NS	intergenic	NELL2,TMEM117
5	36002725	NS	NS	NS	NS	NS	NS	NS	4.0616e-07	9.42405e-09	NS	NS	NS	NS	NS	NS	2.30681e-07	intergenic	NELL2,TMEM117
5	36005077	NS	NS	NS	NS	NS	NS	NS	NS	9.65581e-07	NS	NS	NS	NS	NS	NS	NS	intergenic	NELL2,TMEM117
5	36016917	NS	NS	NS	NS	NS	NS	NS	1.14357e-07	NS	NS	NS	NS	NS	NS	NS	NS	intronic	TMEM117
5	36078571	NS	NS	NS	NS	NS	NS	NS	NS	7.38556e-07	NS	NS	4.37117e-07	NS	NS	NS	NS	intronic	TMEM117
5	36080634	NS	NS	NS	NS	NS	NS	NS	NS	9.24312e-07	NS	NS	NS	NS	NS	NS	NS	intronic	TMEM117
5	40004231	NS	NS	NS	NS	NS	NS	NS	NS	2.10442e-07	NS	NS	NS	NS	NS	NS	NS	intronic	CNTN1
5	40162285	NS	NS	3.06154e-07	NS	NS	NS	NS	NS	NS	NS	NS	NS	NS	NS	NS	NS	intronic	CNTN1
5	40162300	NS	NS	NS	4.00962e-07	NS	NS	NS	NS	NS	NS	7.28603e-07	NS	NS	NS	NS	1.92008e-07	intronic	CNTN1
5	40429046	NS	NS	NS	NS	NS	NS	NS	NS	6.60655e-07	NS	NS	NS	NS	NS	NS	NS	exonic	MUC19
5	40548221	NS	NS	NS	NS	NS	NS	NS	NS	7.41423e-07	NS	NS	NS	NS	NS	NS	NS	intronic	LRRK2
5	40572399	NS	NS	NS	NS	NS	NS	NS	NS	3.73744e-07	NS	NS	NS	NS	NS	NS	NS	intronic	LRRK2
5	40580569	NS	NS	NS	NS	NS	NS	NS	NS	6.54818e-07	NS	NS	NS	NS	NS	NS	NS	intronic	LRRK2
5	41271698	NS	NS	NS	NS	NS	NS	NS	NS	NS	NS	NS	NS	NS	NS	NS	4.89122e-07	intronic	SLC2A13
5	41712048	NS	4.83329e-07	NS	1.66597e-07	1.88164e-07	1.32707e-07	NS	NS	NS	NS	NS	NS	NS	NS	NS	1.82652e-07	intergenic	ABCD2,KIF21A
5	41730940	NS	NS	NS	NS	NS	NS	NS	NS	NS	NS	NS	NS	NS	NS	NS	9.95853e-07	intergenic	ABCD2,KIF21A
5	44766736	NS	NS	NS	7.79713e-07	1.9472e-07	5.31919e-07	NS	NS	NS	NS	8.0646e-07	NS	NS	NS	NS	3.5289e-07	intergenic	LOC107132485,CPM
5	44799181	NS	NS	NS	4.66723e-07	NS	NS	NS	2.55703e-08	4.58943e-08	NS	4.88097e-09	8.17793e-10	NS	NS	NS	2.47763e-09	intergenic	LOC107132485,CPM
5	44804984	NS	NS	NS	NS	NS	NS	NS	NS	NS	NS	2.28982e-07	5.02593e-09	NS	NS	NS	NS	intergenic	LOC107132485,CPM
5	45161012	NS	NS	NS	NS	NS	NS	NS	NS	NS	1.9052e-07	NS	NS	NS	NS	NS	NS	intronic	RAP1B
5	45420953	NS	NS	2.75363e-08	4.40267e-07	NS	4.42167e-07	NS	NS	NS	NS	NS	NS	NS	NS	NS	4.78951e-07	intergenic	RAP1B,MDM1
5	45471982	NS	NS	NS	6.26407e-07	NS	NS	NS	NS	NS	NS	NS	NS	NS	NS	NS	NS	intronic	MDM1
5	48893122	NS	2.17378e-08	NS	NS	NS	NS	NS	NS	NS	NS	NS	NS	NS	NS	NS	NS	intergenic	WIF1,TBC1D30
5	51398188	NS	8.18463e-07	NS	NS	NS	NS	NS	NS	NS	NS	NS	NS	NS	NS	NS	NS	intronic	FAM19A2
5	51715731	NS	NS	NS	1.01186e-07	NS	8.97829e-07	NS	NS	NS	NS	NS	NS	NS	NS	NS	4.05339e-07	intronic	FAM19A2
5	51715738	NS	NS	NS	1.01186e-07	NS	8.97829e-07	NS	NS	NS	NS	NS	NS	NS	NS	NS	4.05339e-07	intronic	FAM19A2
5	51718569	NS	7.8833e-07	NS	4.70565e-08	NS	5.16545e-07	NS	NS	NS	NS	NS	NS	NS	NS	NS	NS	intronic	FAM19A2
5	51720484	NS	NS	NS	9.86127e-07	NS	NS	NS	NS	NS	NS	NS	NS	NS	NS	NS	NS	intronic	FAM19A2
5	62576053	NS	NS	NS	NS	NS	NS	NS	NS	NS	NS	NS	NS	8.56409e-07	NS	NS	NS	intergenic	MIR135A-2,TRNAD-GUC
5	62576226	NS	NS	NS	NS	NS	NS	NS	NS	NS	NS	NS	NS	2.34537e-08	NS	NS	NS	intergenic	MIR135A-2,TRNAD-GUC
5	64591015	NS	9.9321e-07	NS	NS	NS	NS	NS	NS	NS	NS	NS	NS	NS	NS	NS	NS	intronic	ANO4
5	67565654	NS	NS	NS	NS	NS	NS	NS	NS	9.54866e-07	NS	NS	NS	NS	NS	NS	NS	intronic	LOC505479
5	68036058	NS	NS	NS	NS	NS	NS	NS	NS	4.52654e-07	NS	NS	NS	NS	NS	NS	NS	intergenic	TXNRD1,CHST11
5	69316620	NS	NS	3.04111e-08	NS	NS	NS	NS	NS	NS	NS	NS	NS	NS	NS	NS	NS	intergenic	C5H12orf75,NUAK1
5	69316637	NS	NS	4.82741e-08	NS	NS	NS	NS	NS	NS	NS	NS	NS	NS	NS	NS	NS	intergenic	C5H12orf75,NUAK1
5	69369044	NS	NS	5.58835e-07	NS	NS	NS	NS	NS	NS	NS	NS	NS	NS	NS	NS	NS	intergenic	C5H12orf75,NUAK1
5	69377361	NS	NS	NS	9.24815e-07	2.056e-07	2.02964e-07	NS	NS	NS	NS	NS	NS	NS	NS	NS	NS	intergenic	C5H12orf75,NUAK1
5	69378967	NS	NS	4.13679e-08	3.5908e-07	8.34245e-08	7.86633e-08	NS	NS	NS	NS	NS	NS	NS	NS	NS	NS	intergenic	C5H12orf75,NUAK1
5	69380905	NS	NS	NS	NS	NS	NS	NS	NS	NS	NS	NS	NS	NS	NS	NS	8.67101e-07	intergenic	C5H12orf75,NUAK1
5	69776159	NS	NS	NS	NS	NS	NS	NS	NS	9.76706e-08	NS	NS	NS	NS	NS	NS	NS	intronic	POLR3B
5	71723671	NS	NS	NS	NS	NS	NS	NS	NS	3.65679e-07	NS	NS	NS	NS	NS	NS	3.51153e-07	intergenic	MGC137211,MGC137014
5	71727031	NS	NS	NS	NS	NS	NS	NS	NS	3.86953e-07	NS	NS	NS	NS	NS	NS	NS	UTR3	MGC137014
5	71728649	NS	NS	NS	NS	NS	NS	NS	5.42497e-07	1.55328e-10	NS	NS	NS	NS	NS	NS	2.37821e-07	intronic	MGC137014
5	71730093	NS	NS	NS	NS	NS	NS	NS	NS	7.66426e-07	NS	NS	NS	NS	NS	NS	NS	intronic	MGC137014
5	71732605	NS	NS	NS	NS	NS	NS	NS	NS	1.95969e-07	NS	NS	NS	NS	NS	NS	NS	upstream	MGC137014
5	71733797	NS	NS	NS	NS	NS	NS	NS	NS	2.83449e-07	NS	NS	NS	NS	NS	NS	NS	intergenic	MGC137014,LARGE1
5	71733798	NS	NS	NS	NS	NS	NS	NS	NS	2.83449e-07	NS	NS	NS	NS	NS	NS	NS	intergenic	MGC137014,LARGE1
5	71733839	NS	NS	NS	NS	NS	NS	NS	NS	9.49113e-07	NS	NS	NS	NS	NS	NS	NS	intergenic	MGC137014,LARGE1
5	71735017	NS	NS	NS	NS	NS	NS	NS	NS	4.05313e-07	NS	NS	NS	NS	NS	NS	NS	intergenic	MGC137014,LARGE1
5	71735215	NS	NS	NS	NS	NS	NS	NS	NS	8.88172e-08	NS	NS	NS	NS	NS	NS	NS	intergenic	MGC137014,LARGE1
5	71736086	NS	NS	NS	NS	NS	NS	NS	NS	6.0004e-08	NS	NS	NS	NS	NS	NS	3.33105e-08	intergenic	MGC137014,LARGE1
5	71736191	NS	NS	NS	NS	NS	NS	NS	NS	5.54265e-07	NS	NS	NS	NS	NS	NS	NS	intergenic	MGC137014,LARGE1
5	73855198	NS	NS	NS	NS	NS	NS	NS	NS	5.00981e-07	NS	NS	NS	NS	NS	NS	NS	intergenic	MB,LOC616957
5	74458502	NS	NS	NS	NS	NS	NS	NS	NS	NS	NS	NS	NS	NS	6.23937e-07	NS	NS	intergenic	LOC518495,LOC788334
5	75946478	NS	NS	1.92861e-07	NS	4.01096e-08	6.59467e-07	NS	NS	NS	NS	9.90255e-07	NS	NS	NS	NS	2.45474e-07	intergenic	CARD10,USP18
5	79214627	NS	NS	NS	NS	NS	NS	NS	NS	NS	NS	NS	NS	NS	6.68786e-07	NS	NS	intergenic	IPO8,TMTC1
5	106092815	NS	NS	NS	4.82204e-08	1.82904e-07	1.7034e-07	NS	NS	NS	NS	NS	NS	NS	NS	NS	NS	intergenic	CCND2,PARP11
5	113356123	NS	NS	NS	NS	NS	NS	NS	5.30222e-07	NS	NS	NS	NS	NS	NS	NS	NS	intergenic	NFAM1,SERHL2
5	114707790	NS	NS	NS	NS	NS	NS	NS	NS	1.37171e-08	NS	NS	NS	NS	NS	NS	NS	intronic	SAMM50
5	114711234	NS	NS	NS	NS	NS	NS	NS	NS	9.54487e-07	NS	NS	NS	NS	NS	NS	NS	intronic	SAMM50
5	114711724	NS	NS	NS	NS	NS	NS	NS	NS	5.34995e-07	NS	NS	NS	NS	NS	NS	NS	intronic	SAMM50
5	114720064	NS	NS	NS	NS	7.21316e-07	NS	NS	NS	NS	NS	NS	NS	NS	NS	NS	6.58039e-07	intronic	SAMM50
5	115849709	NS	5.21308e-07	NS	NS	NS	NS	NS	NS	NS	NS	NS	NS	NS	NS	NS	NS	intergenic	RIBC2,FBLN1
5	116001243	NS	NS	NS	NS	NS	NS	NS	NS	6.58414e-09	NS	NS	NS	NS	NS	NS	NS	intergenic	FBLN1,ATXN10
5	116004832	NS	NS	NS	NS	NS	NS	NS	NS	1.71332e-08	NS	NS	NS	NS	NS	NS	NS	intergenic	FBLN1,ATXN10
5	116004835	NS	NS	NS	NS	NS	NS	NS	NS	1.71332e-08	NS	NS	NS	NS	NS	NS	NS	intergenic	FBLN1,ATXN10
5	116016623	NS	NS	NS	NS	NS	NS	NS	NS	2.92403e-07	NS	NS	NS	NS	NS	NS	NS	intergenic	FBLN1,ATXN10
5	116026574	NS	NS	NS	NS	NS	NS	NS	NS	4.1116e-07	NS	NS	NS	NS	NS	NS	NS	intergenic	FBLN1,ATXN10
5	116065186	NS	NS	NS	NS	NS	NS	NS	NS	2.67715e-07	NS	NS	NS	NS	NS	NS	NS	intronic	ATXN10
5	116070504	NS	NS	NS	NS	NS	NS	NS	NS	9.45719e-08	NS	NS	NS	NS	NS	NS	NS	intronic	ATXN10
5	116135788	NS	NS	NS	NS	NS	NS	NS	NS	4.84634e-07	NS	NS	NS	NS	NS	NS	NS	intronic	ATXN10
5	116179240	NS	NS	NS	NS	NS	NS	NS	NS	1.55201e-07	NS	NS	NS	NS	NS	NS	NS	intergenic	ATXN10,WNT7B
5	116185557	NS	NS	NS	NS	NS	NS	NS	NS	4.79858e-07	NS	NS	NS	NS	NS	NS	NS	intergenic	ATXN10,WNT7B
5	116197637	NS	NS	NS	NS	NS	NS	NS	NS	8.90362e-08	NS	NS	NS	NS	NS	NS	NS	intergenic	ATXN10,WNT7B
5	116204709	NS	NS	NS	NS	NS	NS	NS	NS	5.42715e-07	NS	NS	NS	NS	NS	NS	NS	intergenic	ATXN10,WNT7B
5	116254130	NS	NS	NS	NS	NS	NS	NS	NS	7.52582e-07	NS	NS	NS	NS	NS	NS	NS	intronic	WNT7B
5	116254131	NS	NS	NS	NS	NS	NS	NS	NS	3.10626e-07	NS	NS	NS	NS	NS	NS	NS	intronic	WNT7B
5	116271075	NS	NS	NS	NS	NS	NS	NS	NS	5.45925e-07	NS	NS	NS	NS	NS	NS	NS	intronic	WNT7B
5	116279615	NS	NS	NS	NS	NS	NS	NS	NS	5.92264e-08	NS	NS	NS	NS	NS	NS	NS	intronic	WNT7B
5	116417044	NS	NS	NS	NS	NS	NS	NS	NS	2.94141e-07	NS	NS	NS	NS	NS	NS	NS	intergenic	MIR3596,PPARA
5	117012873	NS	NS	NS	NS	NS	NS	NS	NS	2.10627e-07	NS	NS	NS	NS	NS	NS	NS	intronic	TBC1D22A
5	117872541	NS	8.61283e-07	NS	NS	4.09007e-07	5.81865e-07	NS	NS	NS	NS	NS	NS	NS	NS	NS	3.00679e-08	intergenic	MIR2285O-5,FAM19A5
5	117918304	NS	NS	NS	NS	NS	NS	NS	6.84625e-07	NS	NS	NS	NS	NS	NS	NS	NS	intergenic	MIR2285O-5,FAM19A5
6	3632430	7.29614e-07	NS	NS	NS	NS	NS	NS	NS	NS	NS	NS	NS	NS	NS	NS	NS	intergenic	ANXA5,QRFPR
6	5200501	NS	NS	NS	NS	7.77158e-07	4.44357e-07	NS	NS	NS	NS	NS	NS	NS	NS	NS	NS	intergenic	PRDM5,TRNAG-CCC
6	37932891	NS	5.8621e-07	NS	4.93921e-09	NS	2.44301e-07	NS	NS	NS	NS	2.40043e-07	NS	NS	NS	NS	1.00884e-07	intergenic	LCORL,SLIT2
6	40020104	NS	6.03817e-07	NS	NS	NS	NS	NS	NS	NS	NS	NS	NS	NS	NS	NS	NS	intronic	SLIT2
6	40159515	NS	1.89924e-08	NS	2.23744e-07	NS	1.51918e-07	NS	NS	NS	NS	NS	NS	NS	NS	NS	NS	intronic	SLIT2
6	40197545	NS	NS	NS	7.50618e-07	NS	6.99328e-07	NS	NS	NS	NS	NS	NS	NS	NS	NS	NS	intergenic	SLIT2,PACRGL
6	40206684	NS	7.7865e-07	NS	3.46092e-07	NS	7.59926e-07	NS	NS	NS	NS	NS	NS	NS	NS	NS	NS	intergenic	SLIT2,PACRGL
6	40729746	NS	6.81842e-08	NS	NS	3.77673e-08	5.00137e-08	NS	NS	NS	NS	NS	NS	NS	NS	NS	NS	intronic	KCNIP4
6	42100069	NS	NS	NS	NS	5.21886e-07	NS	NS	NS	NS	NS	NS	NS	NS	NS	NS	NS	intronic	ADGRA3
6	42217688	NS	3.79181e-08	NS	9.50733e-08	NS	1.24247e-07	NS	NS	NS	NS	NS	NS	NS	NS	NS	NS	intergenic	ADGRA3,GBA3
6	43682914	NS	NS	NS	NS	NS	NS	NS	NS	NS	NS	7.82573e-07	NS	NS	NS	NS	NS	intronic	PPARGC1A
6	44777570	NS	2.99882e-07	NS	1.87456e-08	2.03572e-08	2.05322e-08	NS	NS	NS	NS	NS	NS	NS	NS	NS	NS	intergenic	SEPSECS,PI4K2B
6	45319883	NS	7.18541e-07	NS	NS	NS	NS	NS	NS	NS	NS	NS	NS	NS	NS	NS	NS	intronic	SEL1L3
6	45916479	NS	9.54881e-07	NS	NS	NS	NS	NS	NS	NS	NS	NS	NS	NS	NS	NS	NS	intergenic	RBPJ,CCKAR
6	46006990	5.39187e-07	NS	NS	NS	NS	NS	NS	NS	NS	NS	NS	NS	NS	NS	NS	NS	intergenic	CCKAR,TBC1D19
6	49351490	NS	NS	NS	3.53299e-08	1.52635e-07	1.39304e-07	NS	NS	NS	NS	NS	NS	NS	NS	NS	NS	intergenic	TRNAS-GGA,PCDH7
6	49491435	NS	8.48477e-08	NS	7.27312e-08	4.28631e-08	3.90145e-08	NS	NS	NS	1.81789e-07	7.55397e-08	NS	NS	NS	NS	1.82911e-07	intergenic	TRNAS-GGA,PCDH7
6	50144459	NS	1.41486e-08	NS	7.40032e-07	NS	NS	NS	NS	NS	NS	NS	NS	NS	NS	NS	NS	intronic	PCDH7
6	50399614	NS	7.78981e-08	NS	NS	NS	NS	NS	NS	NS	NS	NS	NS	NS	NS	NS	NS	intronic	PCDH7
6	53570042	NS	8.72077e-08	NS	NS	NS	NS	NS	NS	NS	NS	NS	NS	NS	NS	NS	NS	intergenic	TRNAC-GCA,ARAP2
6	53570969	NS	4.25254e-07	NS	NS	NS	NS	NS	NS	NS	NS	NS	NS	NS	NS	NS	NS	intergenic	TRNAC-GCA,ARAP2
6	53573530	NS	1.0621e-07	NS	NS	NS	NS	NS	NS	NS	NS	NS	NS	NS	NS	NS	NS	intergenic	TRNAC-GCA,ARAP2
6	56729908	NS	8.08647e-07	NS	NS	NS	NS	NS	NS	NS	NS	NS	NS	NS	NS	NS	NS	intronic	NWD2
6	56980988	NS	8.55168e-07	NS	NS	NS	NS	NS	NS	NS	NS	NS	NS	NS	NS	NS	NS	intronic	RELL1
6	61877968	NS	8.71865e-07	NS	NS	NS	NS	NS	NS	NS	NS	NS	NS	NS	NS	NS	NS	intergenic	GRXCR1,TRNAC-ACA
6	63029240	5.92701e-07	NS	NS	NS	NS	NS	NS	NS	NS	NS	NS	NS	NS	NS	NS	NS	intronic	KCTD8
6	64346884	NS	3.82824e-08	NS	6.43583e-08	NS	3.19772e-07	NS	NS	NS	NS	NS	NS	NS	NS	NS	8.62935e-07	intergenic	TRNAC-ACA,GABRG1
6	64867008	NS	7.9976e-07	NS	NS	NS	NS	NS	NS	NS	NS	NS	NS	NS	NS	NS	NS	intronic	GABRA2
6	80560099	NS	5.37962e-07	NS	NS	NS	NS	NS	NS	NS	NS	NS	NS	NS	NS	NS	NS	intergenic	TECRL,EPHA5
6	80560966	NS	2.05064e-07	NS	NS	4.74318e-07	3.24396e-07	NS	NS	NS	NS	NS	NS	NS	NS	NS	NS	intergenic	TECRL,EPHA5
6	80561040	NS	8.79181e-08	NS	NS	NS	5.98224e-07	NS	NS	NS	NS	NS	NS	NS	NS	NS	NS	intergenic	TECRL,EPHA5
6	81943377	NS	NS	NS	NS	NS	NS	NS	NS	NS	NS	3.20432e-07	NS	NS	NS	NS	2.46894e-07	intergenic	EPHA5,CENPC
6	85533142	NS	NS	NS	9.40535e-07	NS	NS	NS	NS	NS	NS	NS	NS	NS	NS	NS	NS	intronic	CSN1S2
6	85584261	NS	NS	NS	NS	3.96928e-07	4.43951e-07	NS	NS	NS	NS	NS	NS	NS	NS	NS	NS	intergenic	LOC100298118,ODAM
6	86699884	NS	NS	NS	NS	7.52491e-07	NS	NS	NS	NS	NS	NS	NS	NS	NS	NS	NS	intronic	SLC4A4
6	90398697	NS	NS	NS	8.12791e-07	NS	NS	NS	NS	NS	NS	NS	NS	NS	NS	NS	5.02546e-07	intergenic	ODAPH,CDKL2
6	91479919	NS	NS	NS	8.62287e-07	NS	NS	NS	NS	NS	NS	NS	NS	NS	NS	NS	NS	intronic	SHROOM3
6	93873882	NS	NS	NS	NS	4.35499e-08	4.82015e-07	NS	NS	NS	NS	5.50898e-07	NS	NS	NS	NS	NS	intergenic	PAQR3,NAA11
6	93873898	NS	NS	2.07833e-07	NS	9.67114e-09	9.23719e-08	NS	NS	NS	NS	3.05153e-07	NS	NS	NS	NS	4.01263e-07	intergenic	PAQR3,NAA11
6	107064501	NS	NS	NS	NS	NS	NS	NS	NS	NS	NS	NS	NS	NS	NS	3.14172e-07	NS	intergenic	LOC101906339,RAB28
6	107069846	NS	NS	NS	NS	NS	NS	NS	NS	NS	NS	NS	NS	NS	NS	9.37649e-08	NS	intergenic	LOC101906339,RAB28
6	108330100	NS	NS	NS	NS	NS	NS	NS	NS	NS	NS	NS	NS	NS	NS	1.76632e-07	NS	intergenic	LOC101906339,RAB28
6	111518558	NS	NS	NS	NS	9.67174e-08	2.69015e-07	NS	NS	NS	NS	NS	NS	NS	NS	NS	NS	intergenic	TAPT1,LDB2
6	111519445	NS	1.83306e-07	NS	6.83809e-07	2.07082e-08	5.25835e-08	NS	NS	NS	NS	NS	NS	NS	NS	NS	NS	intergenic	TAPT1,LDB2
6	111643595	NS	4.35351e-07	NS	NS	NS	NS	NS	NS	NS	NS	NS	NS	NS	NS	NS	NS	intergenic	TAPT1,LDB2
6	113200686	NS	9.10488e-08	NS	NS	NS	5.34448e-07	NS	NS	NS	NS	NS	NS	NS	NS	NS	NS	intergenic	MRFAP1L1,BLOC1S4
6	116143998	NS	NS	NS	NS	NS	NS	NS	NS	NS	NS	NS	NS	NS	NS	6.64918e-07	NS	intronic	FAM193A
6	116312905	NS	NS	NS	2.72219e-07	NS	NS	NS	NS	NS	NS	NS	NS	NS	NS	NS	NS	intronic	ZFYVE28
6	116321882	NS	NS	NS	1.30398e-08	2.97212e-07	1.95903e-07	NS	NS	NS	NS	NS	NS	NS	NS	NS	NS	intronic	ZFYVE28
6	117642203	NS	1.64893e-08	NS	4.63857e-07	3.11845e-08	2.37691e-08	NS	NS	NS	NS	NS	NS	NS	NS	NS	NS	exonic	SLC49A3
7	8758612	NS	NS	NS	NS	NS	NS	NS	NS	NS	NS	NS	NS	NS	NS	NS	5.80951e-07	intergenic	LOC509410,LOC787882
7	8819002	NS	NS	NS	NS	NS	NS	NS	NS	NS	NS	4.65733e-07	5.96917e-08	NS	NS	NS	6.30773e-07	intergenic	LOC787882,LOC112447485
7	10074359	NS	NS	NS	NS	NS	NS	NS	NS	NS	NS	NS	9.93958e-07	NS	NS	NS	NS	intergenic	LOC100295806,LOC100295735
7	10092771	NS	NS	NS	NS	NS	NS	NS	NS	NS	NS	NS	1.01965e-07	NS	NS	NS	NS	intergenic	LOC100295735,LOC785898
7	10225305	NS	NS	NS	NS	NS	NS	NS	NS	NS	NS	7.45063e-07	7.83615e-07	NS	NS	NS	9.67225e-07	intergenic	LOC785946,LOC785981
7	10227490	NS	NS	NS	NS	NS	NS	NS	NS	NS	NS	9.90775e-07	1.43756e-07	NS	NS	NS	NS	intergenic	LOC785946,LOC785981
7	10228334	NS	NS	NS	NS	NS	NS	NS	NS	NS	NS	NS	6.03178e-07	NS	NS	NS	NS	downstream	LOC785981
7	10232974	NS	NS	NS	NS	NS	NS	NS	NS	NS	NS	NS	6.87373e-07	NS	NS	NS	NS	intronic	LOC785981
7	10239678	NS	NS	NS	NS	NS	NS	NS	NS	NS	NS	NS	6.42469e-07	NS	NS	NS	NS	intronic	LOC100138633
7	10254486	NS	NS	NS	NS	NS	NS	NS	NS	NS	NS	NS	1.1643e-07	NS	NS	NS	NS	intergenic	LOC100138633,LOC786119
7	10255201	NS	NS	NS	NS	NS	NS	NS	NS	6.46126e-07	NS	NS	1.90319e-07	NS	NS	NS	NS	intergenic	LOC100138633,LOC786119
7	10256351	NS	NS	NS	NS	NS	NS	NS	NS	NS	NS	NS	4.62063e-07	NS	NS	NS	NS	intergenic	LOC100138633,LOC786119
7	10257068	NS	NS	NS	NS	NS	NS	NS	NS	NS	NS	NS	6.7364e-07	NS	NS	NS	NS	intergenic	LOC100138633,LOC786119
7	10304215	NS	NS	NS	NS	NS	NS	NS	NS	NS	NS	NS	3.08103e-07	NS	NS	NS	NS	intergenic	LOC786149,LOC786202
7	10309808	NS	NS	NS	NS	NS	NS	NS	NS	NS	NS	NS	6.08457e-07	NS	NS	NS	NS	intergenic	LOC786149,LOC786202
7	10309850	NS	NS	NS	NS	NS	NS	NS	NS	5.33737e-07	NS	NS	NS	NS	NS	NS	NS	intergenic	LOC786149,LOC786202
7	11926844	NS	NS	NS	NS	NS	NS	NS	NS	NS	NS	NS	NS	NS	NS	NS	8.39764e-07	intergenic	CCDC130,LOC112447504
7	12061681	NS	3.24819e-07	1.84857e-07	NS	NS	8.03016e-07	NS	NS	NS	NS	NS	NS	NS	NS	NS	NS	intergenic	TRNAG-UCC,CACNA1A
7	13650223	NS	1.17656e-07	NS	1.32653e-07	5.10382e-08	2.24676e-08	NS	NS	NS	NS	NS	NS	NS	NS	NS	9.2795e-07	UTR5	OR7D2
7	18875548	NS	NS	NS	NS	NS	NS	NS	9.00636e-07	NS	NS	NS	NS	NS	NS	NS	NS	intergenic	ZNRF4,PTPRS
7	18881178	NS	NS	NS	NS	NS	NS	NS	5.67126e-07	NS	NS	NS	NS	NS	NS	NS	NS	intergenic	ZNRF4,PTPRS
7	19068763	NS	NS	NS	NS	NS	NS	NS	8.23404e-07	NS	NS	NS	NS	NS	NS	NS	NS	intergenic	PTPRS,KDM4B
7	22767822	NS	1.53728e-07	NS	2.42859e-08	1.02842e-08	1.77881e-08	NS	NS	NS	5.22996e-08	2.13984e-07	NS	NS	NS	NS	6.16535e-08	intronic	FNIP1
7	22868755	NS	9.21641e-07	NS	1.59295e-07	8.55608e-09	4.22148e-08	NS	NS	NS	NS	NS	NS	NS	NS	NS	NS	intronic	RAPGEF6
7	26396443	NS	NS	NS	8.70238e-07	6.378e-07	5.16004e-07	NS	NS	NS	NS	NS	NS	NS	NS	NS	NS	intergenic	CTXN3,PRRC1
7	30137924	NS	NS	NS	1.94484e-07	2.54003e-07	4.13726e-07	NS	NS	NS	NS	1.04716e-07	NS	NS	NS	NS	8.93717e-08	intronic	CSNK1G3
7	30137939	NS	NS	NS	5.30197e-07	6.40984e-07	NS	NS	NS	NS	NS	1.6776e-07	NS	NS	NS	NS	1.83645e-07	intronic	CSNK1G3
7	30145754	NS	2.97182e-09	NS	2.66336e-09	7.70288e-08	8.79947e-09	NS	NS	NS	NS	3.16505e-07	NS	NS	NS	NS	3.77519e-08	intronic	CSNK1G3
7	31040044	NS	NS	NS	4.45826e-07	3.55902e-07	6.21546e-07	NS	NS	NS	NS	NS	NS	NS	NS	NS	5.57139e-07	intronic	SNX2
7	31432024	NS	NS	NS	NS	NS	NS	NS	NS	6.12427e-07	NS	NS	NS	NS	NS	NS	NS	intronic	SNCAIP
7	31493461	NS	NS	NS	NS	NS	NS	NS	NS	3.32683e-07	NS	NS	NS	NS	NS	NS	NS	intronic	SNCAIP
7	31565958	NS	NS	NS	NS	NS	NS	NS	NS	4.06009e-07	NS	NS	NS	NS	NS	NS	NS	intergenic	SNCAIP,LOC781423
7	32537328	NS	NS	NS	NS	NS	NS	NS	NS	9.7921e-07	NS	NS	NS	NS	NS	NS	NS	intergenic	FTMT,FAM170A
7	35649550	NS	NS	NS	NS	NS	NS	NS	NS	2.58231e-07	NS	NS	NS	NS	NS	NS	NS	intergenic	DTWD2,SEMA6A
7	35727767	NS	NS	NS	NS	NS	NS	NS	NS	1.71005e-08	NS	NS	NS	NS	NS	NS	NS	intergenic	DTWD2,SEMA6A
7	35728958	NS	NS	NS	NS	NS	NS	NS	NS	7.30989e-08	NS	NS	NS	NS	NS	NS	NS	intergenic	DTWD2,SEMA6A
7	35796923	NS	NS	NS	NS	NS	NS	NS	NS	8.41223e-08	NS	NS	NS	NS	NS	NS	NS	intergenic	DTWD2,SEMA6A
7	37833167	NS	NS	NS	NS	NS	NS	NS	NS	NS	NS	NS	NS	4.85991e-07	NS	NS	NS	intergenic	COMMD10,ARL10
7	37833203	NS	NS	NS	NS	NS	NS	NS	NS	NS	NS	NS	NS	2.41074e-07	NS	NS	NS	intergenic	COMMD10,ARL10
7	37833204	NS	NS	NS	NS	NS	NS	NS	NS	NS	NS	NS	NS	2.41074e-07	NS	NS	NS	intergenic	COMMD10,ARL10
7	37833214	NS	NS	NS	NS	NS	NS	NS	NS	NS	NS	NS	NS	8.96402e-07	NS	NS	NS	intergenic	COMMD10,ARL10
7	37833216	NS	NS	NS	NS	NS	NS	NS	NS	NS	NS	NS	NS	8.96402e-07	NS	NS	NS	intergenic	COMMD10,ARL10
7	42246702	NS	3.88539e-07	NS	NS	6.24586e-07	3.8335e-07	NS	NS	NS	NS	NS	NS	NS	NS	NS	NS	intergenic	LOC788323,LOC507971
7	43507138	NS	9.48397e-07	NS	NS	NS	NS	NS	NS	NS	NS	NS	NS	NS	NS	NS	NS	intronic	WDR18
7	49579332	NS	NS	NS	NS	NS	NS	NS	8.65548e-07	NS	NS	NS	NS	NS	NS	NS	NS	intronic	NME5
7	52552999	NS	NS	NS	NS	NS	NS	NS	NS	NS	NS	NS	3.90263e-07	NS	NS	NS	NS	intronic	PCDHGA2,PCDHGA8,PCDHGB4
7	53619781	NS	NS	NS	NS	NS	NS	4.57006e-07	NS	NS	NS	NS	NS	NS	NS	NS	NS	intronic	LOC100847454
7	54540243	NS	NS	NS	NS	NS	NS	NS	NS	3.82267e-07	NS	NS	NS	NS	NS	NS	NS	intergenic	NR3C1,TRNAC-GCA
7	54735120	NS	NS	NS	NS	NS	NS	NS	4.35092e-07	2.21103e-08	NS	NS	NS	NS	NS	NS	NS	intergenic	NR3C1,TRNAC-GCA
7	54735752	NS	NS	NS	NS	NS	NS	NS	NS	4.85036e-07	NS	NS	NS	NS	NS	NS	NS	intergenic	NR3C1,TRNAC-GCA
7	54739711	NS	NS	NS	NS	NS	NS	NS	NS	3.50445e-07	NS	NS	NS	NS	NS	NS	NS	intergenic	NR3C1,TRNAC-GCA
7	54750819	NS	NS	NS	NS	NS	NS	NS	NS	5.78486e-07	NS	NS	NS	NS	NS	NS	NS	intergenic	NR3C1,TRNAC-GCA
7	54757148	NS	NS	NS	NS	NS	NS	NS	NS	6.35837e-07	NS	NS	NS	NS	NS	NS	NS	intergenic	NR3C1,TRNAC-GCA
7	54792131	NS	NS	NS	NS	NS	NS	NS	NS	1.48799e-07	NS	NS	NS	NS	NS	NS	NS	intergenic	NR3C1,TRNAC-GCA
7	54820566	NS	NS	NS	NS	NS	NS	NS	NS	9.82263e-07	NS	NS	NS	NS	NS	NS	NS	intergenic	NR3C1,TRNAC-GCA
7	57412878	NS	NS	NS	NS	NS	NS	NS	NS	9.31644e-07	NS	NS	NS	NS	NS	NS	NS	intergenic	LARS,RBM27
7	57414434	NS	NS	NS	NS	NS	NS	NS	NS	2.2982e-07	NS	NS	NS	NS	NS	NS	NS	intergenic	LARS,RBM27
7	57619835	NS	NS	NS	NS	NS	NS	NS	6.52676e-08	7.5636e-08	NS	NS	NS	NS	NS	NS	NS	intergenic	POU4F3,TCERG1
7	57752093	NS	NS	NS	NS	NS	NS	NS	6.40314e-07	NS	NS	NS	NS	NS	NS	NS	NS	intergenic	GPR151,PPP2R2B
7	57754315	NS	NS	NS	NS	NS	NS	NS	5.67908e-08	NS	NS	NS	NS	NS	NS	NS	NS	intergenic	GPR151,PPP2R2B
7	57754358	NS	NS	NS	NS	NS	NS	NS	1.21001e-07	NS	NS	NS	NS	NS	NS	NS	NS	intergenic	GPR151,PPP2R2B
7	57756660	NS	NS	NS	NS	NS	NS	NS	4.85558e-07	5.47338e-07	NS	NS	NS	NS	NS	NS	NS	intergenic	GPR151,PPP2R2B
7	57774326	NS	NS	NS	NS	NS	NS	NS	9.46115e-07	3.65093e-07	NS	NS	NS	NS	NS	NS	NS	intergenic	GPR151,PPP2R2B
7	57776500	NS	NS	NS	NS	NS	NS	NS	1.35833e-07	4.14148e-07	NS	NS	NS	NS	NS	NS	NS	intergenic	GPR151,PPP2R2B
7	57777622	NS	NS	NS	NS	NS	NS	NS	3.08697e-07	NS	NS	NS	NS	NS	NS	NS	NS	intergenic	GPR151,PPP2R2B
7	57779659	NS	NS	NS	NS	NS	NS	NS	4.96985e-07	8.33997e-07	NS	NS	NS	NS	NS	NS	NS	intergenic	GPR151,PPP2R2B
7	60349904	NS	NS	NS	NS	NS	NS	NS	4.92512e-07	NS	NS	NS	NS	NS	NS	NS	NS	intergenic	ADRB2,SH3TC2
7	60357275	NS	NS	NS	NS	NS	NS	NS	7.28851e-07	NS	NS	NS	NS	NS	NS	NS	NS	intergenic	ADRB2,SH3TC2
7	60424622	NS	NS	NS	NS	NS	NS	NS	3.79281e-07	NS	NS	NS	NS	NS	NS	NS	NS	intronic	SH3TC2
7	60774685	NS	NS	NS	NS	NS	NS	NS	NS	1.64131e-07	NS	NS	NS	NS	NS	NS	NS	intronic	IL17B
7	61705551	NS	NS	NS	NS	NS	NS	NS	8.82649e-07	NS	NS	NS	NS	NS	NS	NS	NS	intergenic	ARSI,TCOF1
7	61808174	NS	NS	NS	NS	NS	NS	NS	8.95008e-07	NS	NS	NS	NS	NS	NS	NS	NS	intergenic	RPS14,NDST1
7	61821584	NS	NS	NS	NS	NS	NS	NS	5.8849e-07	NS	NS	NS	NS	NS	NS	NS	NS	intronic	NDST1
7	63928029	NS	NS	NS	NS	NS	NS	NS	9.54825e-07	NS	NS	NS	NS	NS	NS	NS	NS	intergenic	NMUR2,GRIA1
7	64114020	NS	NS	NS	NS	NS	NS	NS	NS	2.39336e-07	NS	NS	NS	NS	NS	NS	NS	intergenic	NMUR2,GRIA1
7	64116578	NS	NS	NS	NS	NS	NS	NS	NS	1.29905e-07	NS	NS	NS	NS	NS	NS	NS	intergenic	NMUR2,GRIA1
7	64121146	NS	NS	NS	NS	NS	NS	NS	NS	2.62242e-08	NS	NS	NS	NS	NS	NS	NS	intergenic	NMUR2,GRIA1
7	64125789	NS	NS	NS	NS	NS	NS	NS	NS	2.34689e-07	NS	NS	NS	NS	NS	NS	NS	intergenic	NMUR2,GRIA1
7	64130949	NS	NS	NS	NS	NS	NS	NS	NS	8.05037e-07	NS	NS	NS	NS	NS	NS	NS	intergenic	NMUR2,GRIA1
7	64133541	NS	NS	NS	NS	NS	NS	NS	2.65879e-09	6.01266e-11	NS	NS	NS	NS	NS	NS	NS	intergenic	NMUR2,GRIA1
7	64138611	NS	NS	NS	NS	NS	NS	NS	NS	3.78332e-07	NS	NS	NS	NS	NS	NS	NS	intergenic	NMUR2,GRIA1
7	64146935	NS	NS	NS	NS	NS	NS	NS	3.70004e-07	1.9565e-08	NS	NS	NS	NS	NS	NS	NS	intergenic	NMUR2,GRIA1
7	64154798	NS	NS	NS	NS	NS	NS	NS	NS	2.67042e-07	NS	NS	NS	NS	NS	NS	NS	intergenic	NMUR2,GRIA1
7	65609693	NS	NS	NS	NS	NS	NS	NS	NS	2.94512e-07	NS	NS	NS	NS	NS	NS	NS	intronic	GALNT10
7	65634623	NS	NS	NS	NS	NS	NS	NS	7.4219e-07	NS	NS	NS	NS	NS	NS	NS	NS	intronic	GALNT10
7	65915900	NS	NS	NS	NS	NS	NS	NS	NS	3.86044e-07	NS	NS	NS	NS	NS	NS	NS	intergenic	HAND1,LARP1
7	65948920	NS	NS	NS	NS	NS	NS	NS	NS	3.90982e-07	NS	NS	NS	NS	NS	NS	NS	intergenic	HAND1,LARP1
7	65954123	NS	NS	NS	NS	NS	NS	NS	NS	8.67612e-07	NS	NS	NS	NS	NS	NS	NS	intronic	LARP1
7	65967046	NS	NS	NS	NS	NS	NS	NS	NS	5.47331e-07	NS	NS	NS	NS	NS	NS	NS	intronic	LARP1
7	65980468	NS	NS	NS	NS	NS	NS	NS	NS	5.91052e-07	NS	NS	NS	NS	NS	NS	NS	intronic	LARP1
7	65980595	NS	NS	NS	NS	NS	NS	NS	NS	1.97821e-07	NS	NS	NS	NS	NS	NS	NS	intronic	LARP1
7	65986124	NS	NS	NS	NS	NS	NS	NS	NS	2.97773e-07	NS	NS	NS	NS	NS	NS	NS	intronic	LARP1
7	65988587	NS	NS	NS	NS	NS	NS	NS	NS	5.36031e-07	NS	NS	NS	NS	NS	NS	NS	intronic	LARP1
7	66010388	NS	NS	NS	NS	NS	NS	NS	NS	2.64897e-07	NS	NS	NS	NS	NS	NS	NS	exonic	LARP1
7	66016163	NS	NS	NS	NS	NS	NS	NS	NS	1.91111e-07	NS	NS	NS	NS	NS	NS	NS	UTR3	FAXDC2
7	66054869	NS	NS	NS	NS	NS	NS	NS	1.89043e-07	1.31672e-07	NS	NS	NS	NS	NS	NS	NS	intronic	CNOT8
7	66065443	NS	NS	NS	NS	NS	NS	NS	NS	1.84251e-07	NS	NS	NS	NS	NS	NS	NS	exonic	GEMIN5
7	66066418	NS	NS	NS	NS	NS	NS	NS	NS	1.20422e-07	NS	NS	NS	NS	NS	NS	NS	intronic	GEMIN5
7	66069134	NS	NS	NS	NS	NS	NS	NS	NS	2.00139e-07	NS	NS	NS	NS	NS	NS	NS	exonic	GEMIN5
7	66072744	NS	NS	NS	NS	NS	NS	NS	NS	9.44195e-07	NS	NS	NS	NS	NS	NS	NS	exonic	GEMIN5
7	66082558	NS	NS	NS	NS	NS	NS	NS	NS	8.41953e-07	NS	NS	NS	NS	NS	NS	NS	intronic	GEMIN5
7	66086714	NS	NS	NS	NS	NS	NS	NS	NS	7.98519e-07	NS	NS	NS	NS	NS	NS	NS	intronic	GEMIN5
7	66095619	NS	NS	NS	NS	NS	NS	NS	NS	6.56757e-07	NS	NS	NS	NS	NS	NS	NS	intronic	GEMIN5
7	67665058	NS	NS	NS	NS	NS	NS	NS	NS	NS	NS	NS	NS	NS	NS	NS	7.05986e-07	intronic	SGCD
7	67708694	NS	NS	NS	NS	NS	NS	NS	2.83745e-07	2.0894e-07	NS	NS	NS	NS	NS	NS	NS	intronic	SGCD
7	67835945	NS	NS	NS	NS	NS	NS	NS	NS	6.44674e-07	NS	NS	NS	NS	NS	NS	NS	intronic	SGCD
7	67925005	NS	NS	NS	NS	NS	NS	NS	NS	9.251e-07	NS	NS	NS	NS	NS	NS	NS	intronic	SGCD
7	67925008	NS	NS	NS	NS	NS	NS	NS	NS	4.3793e-07	NS	NS	NS	NS	NS	NS	NS	intronic	SGCD
7	68468244	NS	NS	NS	NS	NS	NS	NS	NS	7.73153e-07	NS	NS	NS	NS	NS	NS	NS	intergenic	LOC100294726,TRNAG-CCC
7	68468254	NS	NS	NS	NS	NS	NS	NS	NS	7.73153e-07	NS	NS	NS	NS	NS	NS	NS	intergenic	LOC100294726,TRNAG-CCC
7	76654988	NS	1.75214e-07	NS	2.27148e-08	NS	6.80445e-07	NS	NS	NS	NS	NS	NS	NS	NS	NS	1.25552e-07	intergenic	TRNAE-UUC,TRNAC-ACA
7	90169726	NS	NS	NS	5.56177e-07	7.01914e-07	9.76218e-07	NS	NS	NS	NS	NS	NS	NS	NS	NS	NS	intronic	ADGRV1
7	100229129	NS	NS	NS	NS	NS	NS	NS	NS	9.56154e-07	NS	NS	NS	NS	NS	NS	NS	intergenic	ST8SIA4,TRNAE-UUC
7	100854126	NS	NS	7.83925e-08	NS	NS	NS	NS	NS	NS	NS	NS	NS	NS	NS	NS	NS	intergenic	ST8SIA4,TRNAE-UUC
7	100854129	NS	NS	7.83925e-08	NS	NS	NS	NS	NS	NS	NS	NS	NS	NS	NS	NS	NS	intergenic	ST8SIA4,TRNAE-UUC
7	100868242	NS	NS	NS	NS	NS	NS	NS	NS	6.20897e-07	NS	NS	NS	NS	NS	NS	NS	intergenic	ST8SIA4,TRNAE-UUC
7	101175878	NS	NS	3.31575e-07	NS	NS	NS	NS	NS	NS	NS	NS	NS	NS	NS	NS	NS	intergenic	ST8SIA4,TRNAE-UUC
7	101780560	NS	NS	3.52589e-07	NS	NS	NS	NS	NS	NS	NS	NS	NS	NS	NS	NS	NS	intronic	PAM
7	101875591	NS	NS	6.61302e-07	2.52254e-07	NS	8.79632e-07	NS	NS	NS	NS	2.72589e-07	NS	NS	NS	NS	3.13991e-07	intronic	PAM
7	105079117	NS	8.46974e-07	NS	NS	NS	NS	NS	NS	NS	NS	NS	NS	NS	NS	NS	NS	intergenic	LOC112447533,TRNAC-ACA
7	109145462	NS	NS	NS	NS	NS	NS	NS	NS	NS	NS	NS	NS	NS	NS	2.5506e-07	NS	intergenic	MAN2A1,TMEM232
7	110437297	NS	NS	2.89256e-07	NS	NS	NS	NS	NS	NS	NS	NS	NS	NS	NS	NS	NS	intronic	CAMK4
7	110441706	NS	NS	2.01268e-07	NS	NS	NS	NS	NS	NS	NS	NS	NS	NS	NS	NS	NS	intronic	CAMK4
7	110477030	NS	NS	7.04722e-07	NS	NS	NS	NS	NS	NS	NS	NS	NS	NS	NS	NS	NS	intronic	CAMK4
7	110480733	NS	NS	3.79396e-10	NS	NS	NS	NS	NS	NS	NS	NS	NS	NS	NS	NS	NS	intronic	CAMK4
8	2129446	NS	NS	NS	6.04638e-08	NS	9.27631e-07	NS	NS	NS	NS	8.70895e-07	NS	NS	NS	NS	1.27377e-07	intergenic	LOC520638,GALNTL6
8	2215489	NS	1.33355e-09	4.61399e-07	2.50477e-10	6.86302e-12	3.0346e-11	NS	NS	NS	1.77259e-07	NS	NS	NS	NS	NS	3.65959e-08	intergenic	LOC520638,GALNTL6
8	10091926	NS	NS	NS	8.59978e-08	9.4045e-08	1.42993e-07	NS	NS	NS	NS	9.51728e-07	NS	NS	NS	NS	3.98662e-07	intronic	EXTL3
8	34700252	NS	8.41473e-11	1.16749e-08	5.04385e-08	6.13235e-09	7.35565e-10	NS	NS	NS	NS	NS	NS	NS	NS	NS	1.6581e-07	intergenic	NONE,PTPRD
8	37104872	NS	NS	NS	NS	8.51704e-07	5.89554e-07	NS	NS	NS	NS	NS	NS	NS	NS	NS	NS	intergenic	DMAC1,TRNAC-GCA
8	39685895	NS	NS	1.84538e-07	NS	NS	NS	NS	NS	NS	NS	NS	NS	NS	NS	NS	NS	intronic	RCL1
8	42315682	3.31265e-09	NS	NS	NS	NS	NS	NS	NS	NS	NS	NS	NS	NS	NS	NS	NS	intergenic	NONE,SMARCA2
8	42320929	2.3056e-07	NS	NS	NS	NS	NS	NS	NS	NS	NS	NS	NS	NS	NS	NS	NS	intergenic	NONE,SMARCA2
8	42321507	1.00124e-07	NS	NS	NS	NS	NS	NS	NS	NS	NS	NS	NS	NS	NS	NS	NS	intergenic	NONE,SMARCA2
8	42495219	NS	NS	NS	NS	4.34876e-07	5.14589e-07	NS	NS	NS	NS	NS	NS	NS	NS	NS	NS	intronic	SMARCA2
8	42667894	NS	NS	5.21627e-07	NS	NS	8.1738e-07	NS	NS	NS	NS	NS	NS	NS	NS	NS	NS	intergenic	SMARCA2,TRNAE-UUC
8	42797692	NS	NS	2.85654e-07	NS	NS	NS	NS	NS	NS	NS	NS	NS	NS	NS	NS	NS	intergenic	TRNAE-UUC,TRNAC-GCA
8	63007174	NS	7.28246e-07	NS	5.00245e-07	5.91079e-08	1.35195e-07	NS	NS	NS	NS	NS	NS	NS	NS	NS	NS	intergenic	XPA,FOXE1
8	65268874	NS	NS	3.1938e-07	NS	2.23731e-07	3.70375e-07	NS	NS	NS	NS	NS	NS	NS	NS	NS	NS	exonic	INVS
8	65286197	NS	NS	NS	NS	2.2597e-07	4.71811e-07	NS	NS	NS	NS	NS	NS	NS	NS	NS	NS	intronic	TEX10
8	67490395	NS	1.31285e-07	9.35837e-08	NS	NS	3.62905e-07	NS	NS	NS	NS	NS	NS	NS	NS	NS	NS	intergenic	LZTS1,TRNAC-GCA
8	67492485	NS	1.06374e-07	5.21589e-07	4.29223e-07	5.89879e-07	1.60103e-07	NS	NS	NS	NS	NS	NS	NS	NS	NS	NS	intergenic	LZTS1,TRNAC-GCA
8	67492490	NS	1.06374e-07	5.21589e-07	4.29223e-07	5.89879e-07	1.60103e-07	NS	NS	NS	NS	NS	NS	NS	NS	NS	NS	intergenic	LZTS1,TRNAC-GCA
8	67492496	NS	1.78901e-08	1.35198e-07	1.24602e-07	1.8041e-07	3.73948e-08	NS	NS	NS	2.69697e-07	NS	NS	NS	NS	NS	NS	intergenic	LZTS1,TRNAC-GCA
8	67492507	NS	2.17941e-08	6.18568e-07	9.0887e-08	1.09964e-08	8.75868e-09	NS	NS	NS	3.72027e-08	NS	NS	NS	NS	NS	NS	intergenic	LZTS1,TRNAC-GCA
8	67492520	NS	6.42658e-07	NS	NS	NS	NS	NS	NS	NS	NS	NS	NS	NS	NS	NS	NS	intergenic	LZTS1,TRNAC-GCA
8	67646886	NS	NS	NS	NS	NS	NS	NS	NS	NS	NS	NS	3.82661e-07	NS	NS	NS	NS	intergenic	LZTS1,TRNAC-GCA
8	68302375	NS	5.89334e-07	NS	NS	NS	NS	NS	NS	NS	NS	NS	NS	NS	NS	NS	NS	intergenic	TRNAC-GCA,LOC112447755
8	68329081	NS	6.16009e-07	NS	NS	NS	NS	NS	NS	NS	NS	NS	NS	NS	NS	NS	NS	intergenic	TRNAC-GCA,LOC112447755
8	68401775	NS	9.68861e-08	NS	NS	NS	NS	NS	NS	NS	NS	NS	NS	NS	NS	NS	NS	upstream	LOC112447755
8	68470099	NS	2.61697e-07	7.50581e-07	NS	4.1293e-07	2.81406e-07	NS	NS	NS	NS	NS	NS	NS	NS	NS	NS	intronic	LOC112447755
8	85503874	NS	NS	NS	NS	NS	NS	NS	NS	NS	NS	NS	NS	3.06622e-08	NS	NS	NS	intronic	ZNF169
8	95840679	NS	NS	1.21083e-08	NS	NS	NS	NS	NS	NS	NS	NS	NS	NS	NS	NS	NS	intergenic	TMEM38B,ZNF462
8	95844166	NS	NS	8.66438e-07	NS	NS	NS	NS	NS	NS	NS	NS	NS	NS	NS	NS	NS	intergenic	TMEM38B,ZNF462
8	105468683	NS	NS	NS	NS	NS	NS	NS	NS	NS	7.53127e-07	NS	NS	NS	NS	NS	NS	intronic	PAPPA
8	107295356	NS	NS	NS	NS	NS	NS	NS	NS	NS	8.93256e-07	NS	NS	NS	NS	NS	NS	intergenic	TLR4,BRINP1
8	107646387	NS	NS	NS	NS	NS	NS	NS	2.57827e-07	NS	NS	NS	NS	NS	NS	NS	NS	intergenic	TLR4,BRINP1
8	108386832	NS	NS	NS	NS	NS	NS	NS	NS	NS	NS	3.72377e-07	NS	NS	NS	NS	NS	intergenic	TLR4,BRINP1
8	110975436	NS	NS	NS	NS	NS	NS	NS	NS	NS	8.95081e-08	NS	NS	NS	NS	NS	NS	intronic	COLEC11
8	111534699	NS	NS	NS	NS	NS	NS	NS	NS	NS	4.70992e-07	NS	NS	NS	NS	NS	NS	intergenic	LOC107133158,MYT1L
8	111747213	NS	NS	NS	NS	6.87441e-07	NS	NS	NS	NS	NS	NS	NS	NS	NS	NS	NS	intronic	MYT1L
8	112482674	NS	2.21695e-07	NS	5.00572e-07	1.66353e-07	8.05017e-08	NS	NS	NS	NS	NS	NS	NS	NS	NS	NS	intergenic	TMEM18,ALKAL2
9	7001318	NS	NS	4.76805e-07	NS	NS	NS	NS	NS	NS	NS	NS	NS	NS	NS	NS	NS	intergenic	NONE,ADGRB3
9	7001339	NS	NS	1.06631e-07	NS	NS	NS	NS	NS	NS	NS	NS	NS	NS	NS	NS	NS	intergenic	NONE,ADGRB3
9	8429846	NS	NS	9.05477e-07	NS	NS	NS	NS	NS	NS	NS	NS	NS	NS	NS	NS	NS	intergenic	ADGRB3,LMBRD1
9	10030265	NS	NS	NS	NS	NS	NS	NS	NS	6.91065e-07	NS	NS	NS	NS	NS	NS	NS	intronic	B3GAT2
9	10277090	NS	NS	5.01037e-07	NS	NS	NS	NS	NS	NS	NS	NS	NS	NS	NS	NS	NS	intergenic	B3GAT2,OGFRL1
9	13164036	NS	2.20843e-08	6.43006e-08	NS	NS	NS	NS	NS	NS	NS	NS	NS	NS	NS	NS	NS	intergenic	SLC17A5,CD109
9	13189871	NS	NS	1.67089e-07	NS	NS	NS	NS	NS	NS	NS	NS	NS	NS	NS	NS	NS	intergenic	SLC17A5,CD109
9	13801092	NS	NS	3.95064e-07	NS	NS	NS	NS	NS	NS	NS	NS	NS	NS	NS	NS	NS	intergenic	CD109,COL12A1
9	14441381	NS	NS	2.39269e-07	NS	NS	NS	NS	NS	NS	NS	NS	NS	NS	NS	NS	NS	intergenic	CD109,COL12A1
9	14441392	NS	NS	9.81181e-10	NS	NS	NS	NS	NS	NS	NS	NS	NS	NS	NS	NS	NS	intergenic	CD109,COL12A1
9	15924644	NS	NS	6.66311e-07	NS	NS	NS	NS	NS	NS	NS	NS	NS	NS	NS	NS	NS	intergenic	IMPG1,HTR1B
9	18511014	NS	NS	1.1341e-07	NS	NS	NS	NS	NS	NS	NS	NS	NS	NS	NS	NS	NS	intergenic	IRAK1BP1,PHIP
9	19995846	NS	5.64016e-07	7.17182e-07	NS	NS	NS	NS	NS	NS	NS	NS	NS	NS	NS	NS	NS	intronic	BCKDHB
9	20542800	NS	NS	5.35814e-07	NS	NS	NS	NS	NS	NS	NS	NS	NS	NS	NS	NS	NS	intergenic	BCKDHB,FAM46A
9	20575932	NS	NS	9.9603e-07	NS	NS	NS	NS	NS	NS	NS	NS	NS	NS	NS	NS	NS	intergenic	BCKDHB,FAM46A
9	20888108	NS	NS	3.00468e-07	NS	NS	NS	NS	NS	NS	NS	NS	NS	NS	NS	NS	NS	intergenic	BCKDHB,FAM46A
9	25528215	NS	NS	3.43906e-07	NS	NS	NS	NS	NS	NS	NS	NS	NS	NS	NS	NS	NS	intergenic	NCOA7,TRNAE-CUC
9	27576566	NS	NS	7.92498e-07	NS	NS	NS	NS	NS	NS	NS	NS	NS	NS	NS	NS	NS	intergenic	NKAIN2,MIR2478
9	27658068	NS	NS	7.5164e-08	NS	NS	NS	NS	NS	NS	NS	NS	NS	NS	NS	NS	NS	intergenic	NKAIN2,MIR2478
9	27669724	NS	NS	6.50557e-07	NS	NS	NS	NS	NS	NS	NS	NS	NS	NS	NS	NS	NS	intergenic	NKAIN2,MIR2478
9	28678777	NS	NS	4.93475e-08	NS	NS	NS	NS	NS	NS	NS	NS	NS	NS	NS	NS	NS	intergenic	PKIB,SERINC1
9	29327954	NS	NS	8.94777e-07	NS	NS	NS	NS	NS	NS	NS	NS	NS	NS	NS	NS	NS	intergenic	HSF2,GJA1
9	29448809	NS	NS	1.32982e-07	NS	NS	NS	NS	NS	NS	NS	NS	NS	NS	NS	NS	NS	intergenic	HSF2,GJA1
9	29859248	NS	7.05951e-07	3.56441e-08	NS	NS	NS	NS	NS	NS	NS	NS	NS	NS	NS	NS	NS	intronic	TBC1D32
9	29860284	NS	NS	7.01963e-07	NS	NS	NS	NS	NS	NS	NS	NS	NS	NS	NS	NS	NS	intronic	TBC1D32
9	30223296	NS	NS	5.67611e-07	NS	NS	NS	NS	NS	NS	NS	NS	NS	NS	NS	NS	NS	intergenic	TBC1D32,TRNAK-UUU
9	30308712	NS	NS	NS	NS	NS	NS	NS	NS	NS	NS	NS	NS	NS	NS	3.49632e-07	NS	intergenic	TBC1D32,TRNAK-UUU
9	30308713	NS	NS	NS	NS	NS	NS	NS	NS	NS	NS	NS	NS	NS	NS	3.49632e-07	NS	intergenic	TBC1D32,TRNAK-UUU
9	30367917	NS	NS	2.71051e-07	NS	NS	NS	NS	NS	NS	NS	NS	NS	NS	NS	NS	NS	intergenic	TBC1D32,TRNAK-UUU
9	30367935	NS	NS	8.47754e-07	NS	NS	NS	NS	NS	NS	NS	NS	NS	NS	NS	NS	NS	intergenic	TBC1D32,TRNAK-UUU
9	30395011	NS	NS	8.57724e-08	NS	NS	NS	NS	NS	NS	NS	NS	NS	NS	NS	NS	NS	intergenic	TBC1D32,TRNAK-UUU
9	31774262	NS	NS	8.92179e-07	NS	NS	NS	NS	NS	NS	NS	NS	NS	NS	NS	NS	NS	intronic	MAN1A1
9	31917627	NS	NS	9.66769e-07	NS	NS	NS	NS	NS	NS	NS	NS	NS	NS	NS	NS	NS	intergenic	MAN1A1,FAM184A
9	32871065	NS	NS	9.66898e-07	NS	NS	NS	NS	NS	NS	NS	NS	NS	NS	NS	NS	NS	intronic	SLC35F1
9	32898390	NS	8.47975e-10	5.53694e-10	NS	NS	1.29258e-07	NS	NS	NS	NS	NS	NS	NS	NS	NS	7.74104e-07	intronic	SLC35F1
9	32898404	NS	2.31124e-10	1.60421e-10	7.53326e-07	NS	5.23281e-08	NS	NS	NS	NS	NS	NS	NS	NS	NS	1.85671e-07	intronic	SLC35F1
9	32898419	NS	1.70402e-09	1.56214e-09	NS	NS	2.30387e-07	NS	NS	NS	NS	NS	NS	NS	NS	NS	NS	intronic	SLC35F1
9	32910560	NS	NS	1.99913e-08	NS	NS	NS	NS	NS	NS	NS	NS	NS	NS	NS	NS	NS	intronic	SLC35F1
9	33530995	NS	NS	1.51644e-08	NS	NS	NS	NS	NS	NS	NS	NS	NS	NS	NS	NS	5.50243e-07	intergenic	VGLL2,RFX6
9	34008882	NS	NS	5.2783e-07	NS	NS	NS	NS	NS	NS	NS	NS	NS	NS	NS	NS	NS	intergenic	LOC100336222,SULT1C4
9	34018316	NS	NS	1.83206e-07	NS	NS	NS	NS	NS	NS	NS	NS	NS	NS	NS	NS	NS	intergenic	LOC100336222,SULT1C4
9	34169393	NS	NS	9.19911e-07	NS	NS	NS	NS	NS	NS	NS	NS	NS	NS	NS	NS	NS	intronic	CALHM4
9	35103678	NS	NS	9.03006e-07	NS	NS	NS	NS	NS	NS	NS	NS	NS	NS	NS	NS	NS	intergenic	FRK,HS3ST5
9	35738260	NS	NS	9.4223e-07	NS	NS	NS	NS	NS	NS	NS	NS	NS	NS	NS	NS	NS	intergenic	FRK,HS3ST5
9	35959260	NS	NS	7.10127e-07	NS	NS	NS	NS	NS	NS	NS	NS	NS	NS	NS	NS	NS	intergenic	FRK,HS3ST5
9	37101374	NS	NS	1.48041e-07	NS	NS	9.40936e-07	NS	NS	NS	NS	NS	NS	NS	NS	NS	NS	intergenic	MIR2479,LAMA4
9	37101453	NS	NS	6.75127e-08	NS	4.77731e-07	5.08921e-07	NS	NS	NS	NS	NS	NS	NS	NS	NS	4.15366e-07	intergenic	MIR2479,LAMA4
9	37308510	NS	4.9885e-09	4.73901e-08	2.15263e-08	4.42494e-09	1.68919e-09	NS	NS	NS	NS	NS	NS	NS	NS	NS	7.7851e-07	intergenic	MIR2479,LAMA4
9	37308511	NS	4.9885e-09	4.73901e-08	2.15263e-08	4.42494e-09	1.68919e-09	NS	NS	NS	NS	NS	NS	NS	NS	NS	7.7851e-07	intergenic	MIR2479,LAMA4
9	37342800	NS	5.58851e-08	7.67963e-11	3.17668e-07	NS	1.4255e-07	NS	NS	NS	NS	NS	NS	NS	NS	NS	NS	intergenic	MIR2479,LAMA4
9	37359049	NS	NS	9.08921e-07	NS	NS	NS	NS	NS	NS	NS	NS	NS	NS	NS	NS	NS	intergenic	MIR2479,LAMA4
9	37371125	NS	NS	1.48563e-07	NS	5.02574e-07	5.71517e-07	NS	NS	NS	NS	NS	NS	NS	NS	NS	NS	intergenic	MIR2479,LAMA4
9	37401281	NS	NS	4.8165e-07	NS	NS	7.7112e-07	NS	NS	NS	NS	NS	NS	NS	NS	NS	NS	intergenic	MIR2479,LAMA4
9	37401598	NS	2.41523e-07	NS	NS	3.24378e-07	1.78925e-07	NS	NS	NS	NS	NS	NS	NS	NS	NS	NS	intergenic	MIR2479,LAMA4
9	37404842	NS	3.57912e-07	NS	NS	2.48227e-07	2.07757e-07	NS	NS	NS	NS	NS	NS	NS	NS	NS	NS	intergenic	MIR2479,LAMA4
9	37407903	NS	2.05536e-07	4.14973e-07	NS	9.31768e-07	3.34088e-07	NS	NS	NS	NS	NS	NS	NS	NS	NS	NS	intergenic	MIR2479,LAMA4
9	37424376	NS	3.06714e-07	6.59148e-07	NS	NS	4.81682e-07	NS	NS	NS	NS	NS	NS	NS	NS	NS	NS	intergenic	MIR2479,LAMA4
9	37425648	NS	3.27838e-07	NS	NS	NS	NS	NS	NS	NS	NS	NS	NS	NS	NS	NS	NS	intergenic	MIR2479,LAMA4
9	37431145	NS	6.5514e-07	NS	NS	NS	NS	NS	NS	NS	NS	NS	NS	NS	NS	NS	NS	intergenic	MIR2479,LAMA4
9	37696841	NS	2.42887e-07	1.47524e-07	5.50715e-07	3.30944e-07	1.51096e-07	NS	NS	NS	NS	NS	NS	NS	NS	NS	NS	intergenic	MIR2479,LAMA4
9	37994518	NS	NS	5.51788e-08	NS	NS	NS	NS	NS	NS	NS	NS	NS	NS	NS	NS	NS	intergenic	MIR2479,LAMA4
9	38358533	NS	9.37892e-07	5.04199e-07	NS	NS	NS	NS	NS	NS	NS	NS	NS	NS	NS	NS	NS	intronic	TUBE1
9	38933783	NS	NS	NS	NS	NS	NS	NS	NS	NS	NS	NS	NS	NS	NS	2.88029e-08	NS	intronic	REV3L
9	39664464	NS	NS	5.25603e-07	NS	NS	NS	NS	NS	NS	NS	NS	NS	NS	NS	NS	NS	intergenic	CDK19,SLC22A16
9	39871387	NS	NS	NS	NS	NS	NS	NS	NS	NS	NS	NS	NS	NS	NS	7.39173e-07	NS	intronic	METTL24
9	39877121	NS	NS	NS	NS	NS	NS	NS	NS	NS	NS	NS	NS	NS	NS	7.1028e-07	NS	intronic	METTL24
9	39892622	NS	NS	NS	NS	NS	NS	NS	NS	NS	NS	NS	NS	NS	NS	1.0764e-07	NS	intronic	METTL24
9	41316473	NS	5.8138e-07	6.06532e-08	8.38597e-07	NS	NS	NS	NS	NS	NS	NS	NS	NS	NS	NS	NS	intronic	ARMC2
9	41318222	NS	NS	7.66602e-07	NS	NS	NS	NS	NS	NS	NS	3.1264e-07	NS	NS	NS	NS	8.33376e-07	intronic	ARMC2
9	41321109	NS	NS	2.17658e-07	NS	NS	NS	NS	NS	NS	NS	NS	NS	NS	NS	NS	NS	intergenic	ARMC2,FOXO3
9	41529311	NS	NS	NS	NS	NS	NS	NS	NS	NS	NS	NS	NS	NS	NS	9.94878e-07	NS	intronic	FOXO3
9	43384151	NS	NS	NS	2.90419e-07	NS	NS	NS	NS	NS	NS	NS	NS	NS	NS	NS	NS	intronic	CRYBG1
9	43384270	NS	NS	NS	2.55143e-07	NS	NS	NS	NS	NS	NS	NS	NS	NS	NS	NS	NS	intronic	CRYBG1
9	43398644	NS	NS	NS	1.045e-07	1.7913e-07	3.62753e-07	NS	NS	NS	NS	NS	NS	NS	NS	NS	NS	intronic	CRYBG1
9	43403811	NS	NS	NS	9.33145e-07	NS	NS	NS	NS	NS	NS	NS	NS	NS	NS	NS	NS	intronic	CRYBG1
9	44724239	NS	NS	NS	5.7049e-07	NS	NS	NS	NS	NS	NS	NS	NS	NS	NS	NS	NS	intergenic	PREP,POPDC3
9	45998730	NS	NS	NS	NS	NS	NS	NS	NS	NS	NS	NS	NS	NS	NS	9.26934e-08	NS	intergenic	HACE1,TRNAC-ACA
9	45998762	NS	NS	NS	NS	NS	NS	NS	NS	NS	NS	NS	NS	NS	NS	1.67147e-07	NS	intergenic	HACE1,TRNAC-ACA
9	49954198	NS	NS	3.2314e-07	NS	NS	NS	NS	NS	NS	NS	NS	NS	NS	NS	NS	NS	intergenic	MCHR2,PRDM13
9	50944830	NS	NS	NS	NS	NS	NS	NS	NS	NS	NS	NS	NS	NS	NS	1.97051e-07	NS	intergenic	POU3F2,TRNAS-GGA
9	50985148	NS	NS	NS	NS	NS	NS	NS	NS	NS	NS	NS	NS	NS	NS	7.89508e-07	NS	intergenic	POU3F2,TRNAS-GGA
9	52545053	NS	NS	NS	NS	NS	NS	NS	NS	NS	NS	NS	NS	NS	NS	2.9208e-07	NS	intronic	MMS22L
9	52545082	NS	NS	NS	NS	NS	NS	NS	NS	NS	NS	NS	NS	NS	NS	1.23467e-07	NS	intronic	MMS22L
9	53288479	NS	NS	NS	NS	NS	NS	NS	NS	NS	NS	NS	NS	NS	NS	6.69394e-07	NS	intronic	UFL1
9	53288480	NS	NS	NS	NS	NS	NS	NS	NS	NS	NS	NS	NS	NS	NS	6.69394e-07	NS	intronic	UFL1
9	53885753	NS	NS	NS	9.12288e-07	NS	9.28474e-07	NS	NS	NS	NS	NS	NS	NS	NS	NS	NS	intergenic	FUT9,MANEA
9	54154625	NS	NS	NS	NS	NS	NS	NS	NS	NS	NS	NS	NS	NS	NS	5.69956e-07	NS	intergenic	FUT9,MANEA
9	54343724	NS	NS	NS	3.62963e-07	NS	NS	NS	NS	NS	NS	NS	NS	NS	NS	NS	NS	intronic	MANEA
9	54353457	NS	NS	NS	NS	NS	NS	NS	NS	NS	NS	NS	NS	NS	NS	6.55736e-08	NS	intronic	MANEA
9	56629592	NS	NS	NS	NS	NS	NS	NS	NS	NS	NS	NS	NS	NS	NS	9.76801e-07	NS	intergenic	TRNAC-ACA,LOC782527
9	58876239	NS	NS	NS	NS	NS	NS	NS	NS	NS	NS	NS	NS	NS	NS	1.22301e-07	NS	intergenic	EPHA7,MAP3K7
9	59026248	NS	NS	NS	NS	NS	NS	NS	NS	NS	NS	NS	NS	NS	NS	NS	9.62767e-07	intergenic	NONE,MAP3K7
9	59026305	NS	NS	NS	NS	NS	NS	NS	NS	NS	NS	4.11426e-07	NS	NS	NS	NS	3.47258e-07	intergenic	NONE,MAP3K7
9	59876384	NS	NS	NS	8.39899e-07	NS	6.15873e-07	NS	NS	NS	NS	NS	NS	NS	NS	NS	NS	intergenic	MAP3K7,BACH2
9	64880708	NS	NS	NS	9.05834e-07	9.93487e-07	6.62647e-07	NS	NS	NS	1.07956e-07	NS	NS	NS	NS	NS	NS	intergenic	TBX18,CEP162
9	64880716	NS	NS	NS	9.05834e-07	9.93487e-07	6.62647e-07	NS	NS	NS	1.07956e-07	NS	NS	NS	NS	NS	NS	intergenic	TBX18,CEP162
9	65281350	NS	8.9583e-07	NS	NS	NS	NS	NS	NS	NS	NS	NS	NS	NS	NS	NS	NS	intronic	MRAP2
9	65281355	NS	8.9583e-07	NS	NS	NS	NS	NS	NS	NS	NS	NS	NS	NS	NS	NS	NS	intronic	MRAP2
9	69360877	NS	NS	NS	NS	9.94069e-07	7.79721e-07	NS	NS	NS	NS	NS	NS	NS	NS	NS	NS	intergenic	AKAP7,ARG1
9	69389936	NS	NS	NS	5.90112e-07	NS	NS	NS	NS	NS	NS	NS	NS	NS	NS	NS	NS	intergenic	AKAP7,ARG1
9	69460032	NS	9.24924e-07	NS	9.84698e-07	3.21181e-07	3.26135e-07	NS	NS	NS	NS	NS	NS	NS	NS	NS	NS	intergenic	AKAP7,ARG1
9	69462257	NS	9.75999e-07	NS	NS	6.41321e-07	6.88923e-07	NS	NS	NS	NS	NS	NS	NS	NS	NS	NS	intergenic	AKAP7,ARG1
9	69474167	NS	2.58346e-09	NS	8.94374e-09	3.20348e-09	1.8201e-09	NS	NS	NS	4.11444e-09	5.77763e-07	NS	NS	NS	NS	7.97562e-08	intergenic	AKAP7,ARG1
9	69498227	NS	NS	2.01454e-07	NS	NS	NS	NS	NS	NS	NS	NS	NS	NS	NS	NS	NS	intergenic	AKAP7,ARG1
9	69511395	NS	6.53225e-07	NS	6.16449e-08	8.49606e-08	9.80426e-08	NS	NS	NS	6.03152e-07	NS	NS	NS	NS	NS	NS	intergenic	AKAP7,ARG1
9	69515513	NS	1.94967e-07	NS	3.34885e-07	2.40566e-07	1.38919e-07	NS	NS	NS	7.29295e-07	NS	NS	NS	NS	NS	NS	intronic	ARG1
9	69541860	NS	NS	NS	1.7947e-07	1.35344e-07	1.72437e-07	NS	NS	NS	9.83904e-07	NS	NS	NS	NS	NS	NS	intronic	MED23
9	69541869	NS	NS	NS	1.7947e-07	1.35344e-07	1.72437e-07	NS	NS	NS	9.83904e-07	NS	NS	NS	NS	NS	NS	intronic	MED23
9	69612729	NS	NS	NS	3.86996e-07	9.69592e-07	7.41616e-07	NS	NS	NS	NS	NS	NS	NS	NS	NS	NS	intronic	ENPP3
9	69615962	NS	NS	NS	NS	NS	NS	NS	NS	NS	7.50555e-07	NS	NS	NS	NS	NS	NS	intronic	ENPP3
9	69897859	NS	4.1823e-07	8.80669e-08	2.67503e-07	6.16194e-08	4.49587e-08	NS	NS	NS	NS	NS	NS	NS	NS	NS	NS	intronic	LOC101904601
9	71938901	NS	8.36222e-07	NS	NS	NS	NS	NS	NS	NS	NS	NS	NS	NS	NS	NS	NS	intergenic	EYA4,TCF21
9	75241780	NS	3.33474e-07	NS	NS	NS	7.98419e-07	NS	NS	NS	NS	NS	NS	NS	NS	NS	NS	intergenic	IFNGR1,TRNAC-GCA
9	75249453	NS	2.99675e-07	NS	NS	NS	NS	NS	NS	NS	NS	NS	NS	NS	NS	NS	NS	intergenic	IFNGR1,TRNAC-GCA
9	75253296	NS	5.48663e-07	NS	NS	6.81513e-07	3.15341e-07	NS	NS	NS	NS	NS	NS	NS	NS	NS	NS	intergenic	IFNGR1,TRNAC-GCA
9	75420975	NS	1.49197e-07	NS	7.03794e-08	3.21385e-08	2.57135e-08	NS	NS	NS	NS	NS	NS	NS	NS	NS	NS	intergenic	OLIG3,TNFAIP3
9	75425789	NS	5.75242e-07	NS	NS	NS	9.70216e-07	NS	NS	NS	NS	NS	NS	NS	NS	NS	NS	intergenic	OLIG3,TNFAIP3
9	75429409	NS	2.54428e-07	NS	NS	NS	NS	NS	NS	NS	NS	NS	NS	NS	NS	NS	NS	intergenic	OLIG3,TNFAIP3
9	75443638	NS	NS	NS	NS	8.67728e-07	9.94234e-07	NS	NS	NS	NS	NS	NS	NS	NS	NS	NS	intergenic	OLIG3,TNFAIP3
9	75448135	NS	NS	NS	NS	6.32488e-07	8.82071e-07	NS	NS	NS	NS	NS	NS	NS	NS	NS	NS	intergenic	OLIG3,TNFAIP3
9	75699528	NS	3.8931e-07	NS	2.55596e-08	1.88464e-08	2.86088e-08	NS	NS	NS	NS	NS	NS	NS	NS	NS	NS	intergenic	OLIG3,TNFAIP3
9	75743559	NS	9.02867e-07	NS	1.01534e-07	NS	6.21397e-07	NS	NS	NS	NS	NS	NS	NS	NS	NS	NS	intronic	TNFAIP3
9	78644549	NS	NS	NS	5.853e-07	1.30414e-07	2.16418e-07	NS	NS	NS	NS	NS	NS	NS	NS	NS	NS	intergenic	TRNAC-GCA,PWWP2B
9	78836837	NS	NS	NS	7.95968e-07	NS	NS	NS	NS	NS	NS	NS	NS	NS	NS	NS	NS	intergenic	PWWP2B,NMBR
9	79416664	NS	NS	NS	NS	NS	NS	NS	NS	NS	NS	NS	NS	NS	NS	1.6065e-08	NS	intergenic	PWWP2B,NMBR
9	79416679	NS	NS	NS	NS	NS	NS	NS	NS	NS	NS	NS	NS	NS	NS	1.6065e-08	NS	intergenic	PWWP2B,NMBR
9	81247038	NS	8.25369e-07	NS	NS	NS	NS	NS	NS	NS	NS	NS	NS	NS	NS	NS	NS	intronic	PHACTR2
9	82732652	NS	NS	NS	3.53031e-07	NS	NS	NS	NS	NS	NS	NS	NS	NS	NS	NS	NS	intergenic	LOC100294980,EPM2A
9	83394880	NS	NS	NS	NS	NS	NS	NS	NS	NS	NS	NS	NS	NS	9.4154e-07	NS	NS	intronic	GRM1
9	84309466	NS	NS	NS	1.84431e-07	5.32282e-07	3.4067e-07	NS	NS	NS	2.20904e-07	3.47983e-07	NS	NS	NS	NS	6.62579e-07	intergenic	ADGB,STXBP5
9	85239125	NS	2.64627e-08	NS	5.39688e-09	7.16354e-10	1.72271e-09	NS	NS	NS	NS	NS	NS	NS	NS	NS	5.9887e-07	intergenic	SAMD5,SASH1
9	87085605	NS	7.55476e-08	NS	NS	NS	NS	NS	NS	NS	NS	NS	NS	NS	NS	NS	NS	intergenic	ULBP21,RAET1L
9	87847760	NS	NS	NS	NS	NS	NS	NS	NS	6.08831e-08	NS	NS	NS	NS	NS	NS	NS	UTR5	PLEKHG1
9	90224260	NS	2.30268e-08	NS	9.08771e-09	8.50724e-10	2.3709e-09	NS	NS	NS	NS	NS	NS	NS	NS	NS	NS	intergenic	RGS17,OPRM1
9	92039698	NS	NS	NS	1.48375e-07	5.64644e-07	6.45322e-07	NS	NS	NS	NS	NS	NS	NS	NS	NS	NS	intronic	NOX3
9	97993176	NS	NS	9.87591e-08	NS	NS	NS	NS	NS	NS	NS	NS	NS	NS	NS	NS	NS	intronic	PRKN
9	98051879	NS	NS	9.37861e-07	NS	NS	NS	NS	NS	NS	NS	NS	NS	NS	NS	NS	NS	intronic	PRKN
9	98287597	NS	NS	6.42062e-08	NS	NS	NS	NS	NS	NS	NS	NS	NS	NS	NS	NS	NS	intergenic	PACRG,QKI
9	98551895	NS	NS	2.4622e-07	NS	NS	NS	NS	NS	NS	NS	NS	NS	NS	NS	NS	NS	intergenic	PACRG,QKI
9	99137831	NS	NS	1.26092e-07	NS	NS	NS	NS	NS	NS	NS	NS	NS	NS	NS	NS	NS	intergenic	QKI,TRNAC-GCA
9	100857506	NS	NS	NS	NS	NS	NS	NS	NS	NS	NS	NS	NS	NS	NS	6.0307e-08	NS	intergenic	PDE10A,TBXT
9	101744585	NS	NS	6.18708e-07	NS	NS	NS	NS	NS	NS	NS	NS	NS	NS	NS	NS	NS	intergenic	RPS6KA2,RNASET2
9	101746783	NS	NS	5.60102e-07	NS	NS	NS	NS	NS	NS	NS	NS	NS	NS	NS	NS	NS	intergenic	RPS6KA2,RNASET2
9	102429297	NS	NS	NS	9.74388e-07	NS	NS	NS	NS	NS	NS	NS	NS	NS	NS	NS	NS	intronic	KIF25
9	102477417	NS	NS	NS	3.04299e-07	NS	NS	NS	NS	NS	NS	NS	NS	NS	NS	NS	NS	intergenic	FRMD1,DACT2
9	104427716	NS	NS	6.49572e-07	NS	NS	NS	NS	NS	NS	NS	NS	NS	NS	NS	NS	NS	intergenic	LOC100301231,TRNAY-GUA
9	104427876	NS	NS	2.4132e-08	2.26319e-07	1.17324e-07	1.77705e-07	NS	NS	NS	NS	1.11996e-07	NS	NS	NS	NS	8.37059e-09	intergenic	LOC100301231,TRNAY-GUA
9	104427965	NS	NS	NS	NS	NS	NS	NS	NS	NS	NS	NS	NS	NS	NS	NS	8.5018e-07	intergenic	LOC100301231,TRNAY-GUA
9	104428080	NS	9.97621e-07	1.45877e-08	2.09585e-08	4.64124e-08	3.86269e-08	NS	NS	NS	NS	2.02141e-07	NS	NS	NS	NS	1.87943e-08	intergenic	LOC100301231,TRNAY-GUA
9	104428207	NS	NS	1.53128e-07	NS	NS	NS	NS	NS	NS	NS	NS	NS	NS	NS	NS	NS	intergenic	LOC100301231,TRNAY-GUA
10	16082029	NS	NS	NS	NS	NS	NS	NS	NS	NS	NS	NS	NS	4.10817e-07	NS	NS	NS	intronic	GLCE
10	26364037	NS	NS	2.1683e-07	NS	NS	NS	NS	NS	NS	NS	NS	NS	NS	NS	NS	NS	intergenic	RNASE1,RNASE6
10	27707866	NS	NS	3.77326e-08	NS	NS	NS	NS	NS	NS	NS	NS	NS	NS	NS	NS	NS	intergenic	LOC781713,LOC100300401
10	27819142	5.73691e-07	NS	NS	NS	NS	NS	NS	NS	NS	NS	NS	NS	NS	NS	NS	NS	intergenic	LOC785647,LOC785623
10	38665097	NS	NS	NS	NS	NS	NS	NS	NS	NS	NS	4.93924e-07	4.49473e-08	NS	NS	NS	NS	intergenic	EPB42,RPL10L
10	40745679	NS	NS	NS	NS	NS	NS	NS	NS	NS	NS	2.12033e-08	3.45356e-08	NS	NS	NS	6.5616e-07	exonic	MDGA2
10	42141365	NS	NS	NS	NS	NS	NS	NS	NS	NS	NS	NS	9.70939e-07	NS	NS	NS	NS	intergenic	MDGA2,RPS29
10	42141373	NS	NS	NS	NS	NS	NS	NS	NS	NS	NS	NS	9.70939e-07	NS	NS	NS	NS	intergenic	MDGA2,RPS29
10	42141395	NS	NS	NS	NS	NS	NS	NS	NS	NS	NS	NS	2.37084e-07	NS	NS	NS	NS	intergenic	MDGA2,RPS29
10	42151770	NS	NS	NS	NS	NS	NS	NS	NS	NS	NS	NS	3.04217e-07	NS	NS	NS	NS	intergenic	MDGA2,RPS29
10	42151829	NS	NS	NS	NS	NS	NS	NS	NS	NS	NS	NS	1.98596e-07	NS	NS	NS	NS	intergenic	MDGA2,RPS29
10	42152200	NS	NS	NS	NS	NS	NS	NS	NS	NS	NS	NS	2.09333e-07	NS	NS	NS	NS	intergenic	MDGA2,RPS29
10	42368448	NS	NS	NS	NS	NS	NS	NS	NS	NS	NS	NS	3.05386e-08	NS	NS	NS	NS	intergenic	MDGA2,RPS29
10	43983866	NS	NS	NS	NS	9.55462e-07	NS	NS	NS	NS	NS	NS	NS	NS	NS	NS	NS	intergenic	TRIM9,TMX1
10	45088662	NS	NS	NS	NS	NS	NS	NS	NS	NS	NS	NS	9.85698e-08	NS	NS	NS	NS	intergenic	NID2,PTGDR
10	56435331	NS	NS	NS	NS	NS	NS	NS	NS	NS	NS	NS	6.40253e-07	NS	NS	NS	NS	intergenic	UNC13C,WDR72
10	63885063	NS	NS	NS	NS	NS	NS	NS	NS	NS	NS	NS	NS	NS	NS	NS	9.31362e-07	intergenic	SEMA6D,SQOR
10	63885085	NS	NS	NS	NS	NS	NS	NS	NS	NS	NS	6.80912e-07	NS	NS	NS	NS	8.02367e-07	intergenic	SEMA6D,SQOR
10	64336210	4.56067e-07	NS	NS	NS	NS	NS	NS	NS	NS	NS	NS	NS	NS	NS	NS	NS	intergenic	SEMA6D,SQOR
10	64336248	6.0076e-07	NS	NS	NS	NS	NS	NS	NS	NS	NS	NS	NS	NS	NS	NS	NS	intergenic	SEMA6D,SQOR
10	75301603	NS	NS	NS	NS	NS	NS	NS	NS	NS	NS	NS	1.33097e-07	NS	NS	NS	NS	intronic	KCNH5
10	94522994	NS	2.97644e-07	NS	1.57211e-07	1.78392e-07	9.41059e-08	NS	NS	NS	NS	NS	NS	NS	NS	NS	NS	intergenic	LOC100140640,MIR2293
10	98944224	NS	NS	NS	NS	NS	NS	NS	NS	NS	NS	NS	NS	NS	NS	3.80096e-07	NS	intergenic	TRNAC-ACA,GALC
10	98945020	NS	NS	NS	NS	NS	NS	NS	NS	NS	NS	NS	NS	NS	NS	9.03297e-07	NS	intergenic	TRNAC-ACA,GALC
11	5473340	NS	2.9774e-07	7.89616e-07	NS	4.08626e-08	7.65156e-08	NS	NS	NS	NS	NS	NS	NS	NS	NS	NS	intronic	LONRF2
11	5515316	NS	NS	NS	NS	1.18403e-07	8.2811e-07	NS	NS	NS	NS	NS	NS	NS	NS	NS	NS	intronic	CHST10
11	5521683	NS	3.36868e-07	1.44873e-08	NS	6.58361e-07	2.15114e-07	NS	NS	NS	NS	NS	NS	NS	NS	NS	NS	intronic	CHST10
11	13492040	NS	NS	NS	NS	NS	NS	NS	NS	NS	NS	NS	NS	NS	NS	1.45936e-07	NS	intronic	VAX2
11	16109627	NS	NS	NS	NS	NS	NS	NS	NS	NS	NS	NS	NS	NS	NS	8.00044e-07	NS	intronic	RASGRP3
11	16109647	NS	NS	NS	NS	NS	NS	NS	NS	NS	NS	NS	NS	NS	NS	2.6819e-07	NS	intronic	RASGRP3
11	17929871	NS	NS	NS	NS	NS	NS	NS	NS	NS	NS	NS	NS	4.74621e-07	NS	NS	NS	intergenic	FAM98A,TRNAM-CAU
11	19942057	NS	NS	NS	NS	NS	NS	NS	NS	NS	NS	NS	NS	NS	NS	4.60328e-07	NS	intergenic	QPCT,CDC42EP3
11	24730067	NS	NS	NS	NS	NS	NS	NS	NS	NS	NS	4.3385e-07	NS	NS	NS	NS	NS	intronic	EML4
11	24740872	NS	8.12714e-08	NS	5.23528e-09	1.12129e-08	8.52602e-09	NS	NS	NS	NS	NS	NS	NS	NS	NS	NS	UTR3	EML4
11	25473824	NS	NS	8.18303e-08	NS	NS	NS	NS	NS	NS	NS	NS	NS	NS	NS	NS	NS	intergenic	TRNAI-UAU,ZFP36L2
11	31978148	NS	NS	NS	NS	NS	NS	NS	NS	NS	8.77597e-07	NS	NS	NS	NS	NS	NS	intergenic	FSHR,NRXN1
11	31978255	NS	NS	NS	NS	NS	NS	NS	NS	NS	6.03847e-07	NS	NS	NS	NS	NS	NS	intergenic	FSHR,NRXN1
11	32089477	NS	NS	NS	3.6373e-07	4.28104e-07	3.2561e-07	NS	NS	NS	NS	NS	NS	NS	NS	NS	NS	intergenic	FSHR,NRXN1
11	40524290	NS	NS	9.27847e-07	NS	NS	NS	NS	NS	NS	NS	NS	NS	NS	NS	NS	NS	intergenic	TRNAC-GCA,VRK2
11	41710551	NS	NS	NS	NS	NS	NS	NS	NS	NS	NS	NS	6.46094e-07	NS	NS	NS	NS	intergenic	TRNAC-ACA,BCL11A
11	41710663	NS	7.16736e-07	NS	NS	NS	8.953e-07	NS	NS	NS	NS	NS	NS	NS	NS	NS	NS	intergenic	TRNAC-ACA,BCL11A
11	45788498	NS	7.80609e-07	NS	NS	NS	9.82121e-07	NS	NS	NS	NS	NS	NS	NS	NS	NS	NS	intergenic	UXS1,C11H2orf40
11	45812094	NS	9.30818e-07	NS	NS	9.42103e-07	4.86208e-07	NS	NS	NS	NS	NS	NS	NS	NS	NS	NS	intergenic	UXS1,C11H2orf40
11	45814885	NS	3.52985e-07	2.904e-07	3.22793e-07	1.96864e-07	8.51896e-08	NS	NS	NS	NS	NS	NS	NS	NS	NS	NS	intergenic	UXS1,C11H2orf40
11	45814903	NS	3.36872e-07	NS	7.25377e-07	6.18337e-07	2.24715e-07	NS	NS	NS	NS	NS	NS	NS	NS	NS	NS	intergenic	UXS1,C11H2orf40
11	45815013	NS	2.82274e-07	NS	NS	NS	2.8147e-07	NS	NS	NS	NS	NS	NS	NS	NS	NS	NS	intergenic	UXS1,C11H2orf40
11	53848142	NS	NS	5.18683e-07	NS	NS	NS	NS	NS	NS	NS	NS	NS	NS	NS	NS	NS	intergenic	NONE,CTNNA2
11	55983167	NS	NS	3.36891e-07	NS	NS	NS	NS	NS	NS	NS	NS	NS	NS	NS	NS	NS	intronic	CTNNA2
11	56136341	NS	7.87252e-07	NS	NS	NS	NS	NS	NS	NS	NS	NS	NS	NS	NS	NS	NS	intronic	CTNNA2
11	56300198	NS	3.21935e-07	2.39605e-07	NS	NS	6.84701e-07	NS	NS	NS	NS	NS	NS	NS	NS	NS	NS	intergenic	CTNNA2,LOC107132934
11	56394100	NS	NS	6.10928e-07	NS	NS	NS	NS	NS	NS	NS	NS	NS	NS	NS	NS	NS	intergenic	CTNNA2,LOC107132934
11	60678407	NS	NS	8.10251e-07	NS	NS	NS	NS	NS	NS	NS	NS	NS	NS	NS	NS	NS	intergenic	COMMD1,B3GNT2
11	60930254	NS	NS	6.53173e-07	NS	NS	NS	NS	NS	NS	NS	NS	NS	NS	NS	NS	NS	intergenic	B3GNT2,TMEM17
11	63238443	NS	NS	2.59962e-07	NS	NS	NS	NS	NS	NS	NS	NS	NS	NS	NS	NS	NS	intergenic	SERTAD2,SLC1A4
11	65603976	NS	NS	7.99435e-07	NS	NS	NS	NS	NS	NS	NS	NS	NS	NS	NS	NS	NS	intergenic	LOC100139826,ETAA1
11	82756820	NS	NS	NS	NS	9.17506e-07	NS	NS	NS	NS	NS	NS	NS	NS	NS	NS	NS	intronic	NBAS
11	83686049	NS	NS	NS	NS	8.27603e-07	NS	NS	NS	NS	NS	NS	NS	NS	NS	NS	NS	intergenic	FAM84A,LOC782101
11	84256799	NS	NS	NS	NS	NS	NS	1.50642e-07	4.70116e-07	NS	NS	NS	NS	NS	NS	NS	NS	intergenic	LOC782101,TRIB2
11	85158419	NS	7.13059e-08	NS	9.87361e-07	1.30605e-07	5.71094e-08	NS	NS	NS	NS	NS	NS	NS	NS	NS	NS	intergenic	LOC782101,TRIB2
11	87281224	NS	8.81165e-07	NS	NS	NS	NS	NS	NS	NS	NS	NS	NS	NS	NS	NS	NS	intronic	HPCAL1
11	87308242	NS	9.89901e-07	NS	NS	NS	8.20185e-07	NS	NS	NS	NS	NS	NS	NS	NS	NS	NS	intronic	HPCAL1
11	89642718	NS	7.4281e-07	NS	NS	NS	NS	NS	NS	NS	NS	NS	NS	NS	NS	NS	NS	intergenic	MIR2284AA-1,RNF144A
11	90756667	NS	2.64557e-07	NS	NS	5.15436e-07	3.33327e-07	NS	NS	NS	NS	NS	NS	NS	NS	NS	NS	intergenic	CMPK2,SOX11
11	91340309	NS	2.79399e-07	1.12882e-10	2.1444e-07	NS	2.84606e-07	NS	NS	NS	NS	NS	NS	NS	NS	NS	1.81741e-07	intergenic	SOX11,TRNAS-ACU
11	91340336	NS	7.0523e-07	1.69854e-09	1.45313e-07	NS	5.16608e-07	NS	NS	NS	NS	NS	NS	NS	NS	NS	5.80987e-07	intergenic	SOX11,TRNAS-ACU
11	91416095	NS	NS	NS	NS	6.40943e-07	NS	NS	NS	NS	NS	NS	NS	NS	NS	NS	NS	intergenic	SOX11,TRNAS-ACU
11	91696369	NS	NS	7.2472e-07	NS	NS	NS	NS	NS	NS	NS	NS	NS	NS	NS	NS	NS	intergenic	TRNAS-ACU,LOC525099
11	91696462	NS	9.2596e-07	1.23913e-09	NS	NS	NS	NS	NS	NS	NS	NS	NS	NS	NS	NS	NS	intergenic	TRNAS-ACU,LOC525099
11	91696526	NS	6.80184e-07	2.05e-09	NS	NS	NS	NS	NS	NS	NS	NS	NS	NS	NS	NS	NS	intergenic	TRNAS-ACU,LOC525099
11	91776444	NS	NS	NS	NS	NS	NS	NS	NS	NS	NS	NS	NS	NS	NS	7.04132e-07	NS	intergenic	TRNAS-ACU,LOC525099
11	91864160	NS	NS	5.9484e-08	NS	NS	NS	NS	NS	NS	NS	NS	NS	NS	NS	NS	NS	intergenic	TRNAS-ACU,LOC525099
11	92068258	NS	NS	1.31129e-07	7.1054e-07	2.10067e-07	2.47085e-07	NS	NS	NS	NS	NS	NS	NS	NS	NS	NS	intergenic	TRNAS-ACU,LOC525099
11	92166324	NS	NS	NS	NS	NS	9.07855e-07	NS	NS	NS	NS	NS	NS	NS	NS	NS	NS	intergenic	TRNAS-ACU,LOC525099
11	92668451	NS	NS	1.10324e-07	NS	6.80584e-07	NS	NS	NS	NS	NS	NS	NS	NS	NS	NS	NS	intronic	DAB2IP
11	92670821	NS	2.86234e-09	6.73054e-10	1.35553e-09	1.08685e-10	1.3515e-10	NS	NS	NS	NS	5.26968e-08	NS	NS	NS	NS	2.00411e-09	intronic	DAB2IP
11	92671529	NS	1.75799e-07	3.11394e-08	9.28338e-08	1.77663e-08	1.85364e-08	NS	NS	NS	NS	NS	NS	NS	NS	NS	NS	intronic	DAB2IP
11	92671929	NS	NS	NS	NS	5.25204e-07	8.97324e-07	NS	NS	NS	NS	NS	NS	NS	NS	NS	NS	intronic	DAB2IP
11	92671982	NS	NS	NS	NS	7.41489e-07	9.36333e-07	NS	NS	NS	NS	NS	NS	NS	NS	NS	NS	intronic	DAB2IP
11	92672443	NS	8.08874e-07	NS	NS	9.14395e-07	7.00512e-07	NS	NS	NS	NS	NS	NS	NS	NS	NS	NS	intronic	DAB2IP
11	92672821	NS	4.47383e-08	2.3995e-07	6.86996e-07	1.70108e-07	4.9807e-08	NS	NS	NS	NS	NS	NS	NS	NS	NS	9.62796e-07	intronic	DAB2IP
11	92780931	NS	NS	8.35917e-07	NS	NS	NS	NS	NS	NS	NS	NS	NS	NS	NS	NS	NS	intronic	TTLL11
11	93185097	NS	4.66597e-08	7.79771e-11	7.33198e-08	3.07544e-07	2.9136e-08	NS	NS	NS	NS	NS	NS	NS	NS	NS	NS	intronic	MRRF
11	93185157	NS	NS	5.31424e-07	NS	NS	NS	NS	NS	NS	NS	NS	NS	NS	NS	NS	NS	intronic	MRRF
11	93462257	NS	NS	5.16425e-07	NS	NS	NS	NS	NS	NS	NS	NS	NS	NS	NS	NS	NS	intergenic	LOC615170,LOC510731
11	93882767	NS	NS	3.71192e-07	NS	NS	NS	NS	NS	NS	NS	NS	NS	NS	NS	NS	NS	intergenic	OR1L6,LOC786610
11	93938501	NS	NS	2.61527e-07	4.80219e-08	8.0282e-09	2.82416e-08	NS	NS	NS	NS	3.16995e-08	NS	NS	NS	NS	7.03609e-09	upstream	LOC525818
11	93938511	NS	NS	2.37985e-07	5.984e-08	1.26237e-08	3.46612e-08	NS	NS	NS	NS	8.54469e-08	NS	NS	NS	NS	9.84002e-09	upstream	LOC525818
11	93958587	NS	NS	8.54671e-07	NS	NS	NS	NS	NS	NS	NS	NS	NS	NS	NS	NS	NS	intergenic	LOC525818,OR5C1
11	93982429	NS	NS	NS	NS	NS	NS	NS	NS	NS	NS	3.77526e-07	NS	NS	NS	NS	5.30015e-07	intergenic	OR1K1,PDCL
11	93999932	NS	NS	NS	NS	5.72955e-07	7.91673e-07	NS	NS	NS	NS	9.78411e-08	NS	NS	NS	NS	2.41842e-08	intergenic	PDCL,RC3H2
11	94020231	NS	NS	2.39403e-07	2.43188e-07	2.44445e-07	6.47359e-07	NS	NS	NS	NS	NS	NS	NS	NS	NS	2.28121e-07	intronic	RC3H2
11	94035011	NS	NS	NS	NS	NS	NS	NS	NS	NS	NS	8.7747e-07	NS	NS	NS	NS	NS	intronic	RC3H2
11	95182457	NS	NS	2.56501e-07	NS	NS	NS	NS	NS	NS	NS	NS	NS	NS	NS	NS	NS	intergenic	LHX2,NEK6
11	95247789	NS	NS	1.92675e-07	NS	NS	NS	NS	NS	NS	NS	NS	NS	NS	NS	NS	NS	intergenic	LHX2,NEK6
11	95277626	NS	NS	2.69394e-07	NS	NS	NS	NS	NS	NS	NS	NS	NS	NS	NS	NS	NS	intergenic	LHX2,NEK6
11	95277637	NS	NS	8.53733e-07	NS	NS	NS	NS	NS	NS	NS	NS	NS	NS	NS	NS	NS	intergenic	LHX2,NEK6
11	95287637	NS	NS	5.71415e-07	NS	NS	NS	NS	NS	NS	NS	NS	NS	NS	NS	NS	NS	intergenic	LHX2,NEK6
11	97204226	NS	NS	NS	8.54176e-07	NS	NS	NS	NS	NS	NS	NS	NS	NS	NS	NS	NS	intronic	MVB12B
11	97206270	NS	NS	NS	1.59528e-07	1.17194e-07	1.97683e-07	NS	NS	NS	NS	NS	NS	NS	NS	NS	NS	intronic	MVB12B
11	97268492	NS	1.29873e-07	5.98112e-07	NS	NS	NS	NS	NS	NS	NS	NS	NS	NS	NS	NS	NS	intronic	MVB12B
11	99767866	NS	NS	NS	3.06019e-07	8.86897e-08	1.75893e-07	NS	NS	NS	NS	NS	NS	NS	NS	NS	NS	intergenic	IER5L,LOC101904867
11	99792686	NS	8.87758e-07	NS	NS	NS	NS	NS	NS	NS	NS	NS	NS	NS	NS	NS	NS	intergenic	IER5L,LOC101904867
11	100206953	NS	1.4313e-07	NS	NS	NS	7.93442e-07	NS	NS	NS	NS	NS	NS	NS	NS	NS	NS	intronic	C11H9orf78
11	100623242	NS	NS	NS	1.25858e-08	NS	2.7998e-07	NS	NS	NS	NS	NS	NS	NS	NS	NS	1.25161e-07	intronic	HMCN2
11	100623290	NS	9.91686e-07	NS	NS	NS	NS	NS	NS	NS	NS	NS	NS	NS	NS	NS	NS	intronic	HMCN2
11	100632770	NS	NS	NS	9.61907e-07	NS	NS	NS	NS	NS	NS	NS	NS	NS	NS	NS	NS	intronic	HMCN2
11	100633625	NS	NS	NS	1.21069e-07	2.18286e-07	2.97464e-07	NS	NS	NS	NS	NS	NS	NS	NS	NS	NS	intronic	HMCN2
11	100730225	NS	3.90944e-08	NS	NS	NS	NS	NS	NS	NS	NS	NS	NS	NS	NS	NS	NS	intronic	HMCN2
11	100731032	NS	7.6518e-07	NS	NS	NS	NS	NS	NS	NS	NS	NS	NS	NS	NS	NS	NS	intronic	HMCN2
11	100732026	NS	NS	NS	NS	7.50832e-07	NS	NS	NS	NS	NS	NS	NS	NS	NS	NS	NS	exonic	HMCN2
11	100740871	NS	NS	NS	NS	NS	8.00865e-07	NS	NS	NS	NS	NS	NS	NS	NS	NS	NS	intronic	HMCN2
11	100758943	NS	9.05265e-07	NS	NS	NS	7.84763e-07	NS	NS	NS	NS	NS	NS	NS	NS	NS	NS	intergenic	HMCN2,ASS1
11	100864486	NS	NS	NS	9.91009e-08	NS	NS	NS	NS	NS	NS	NS	NS	NS	NS	NS	NS	intergenic	ASS1,FUBP3
11	100961806	NS	NS	NS	1.52443e-07	4.75265e-07	4.46554e-07	NS	NS	NS	NS	NS	NS	NS	NS	NS	NS	intronic	PRDM12
11	100973480	NS	NS	NS	7.06373e-07	NS	NS	NS	NS	NS	NS	NS	NS	NS	NS	NS	NS	intergenic	PRDM12,EXOSC2
11	100976634	NS	6.09456e-07	NS	1.0849e-07	1.46061e-07	9.86156e-08	NS	NS	NS	NS	NS	NS	NS	NS	NS	NS	UTR5	EXOSC2
11	100985527	NS	NS	NS	6.87984e-07	NS	NS	NS	NS	NS	NS	NS	NS	NS	NS	NS	NS	UTR3	EXOSC2
11	101442040	NS	3.17704e-07	NS	1.2647e-07	1.71678e-07	1.11768e-07	NS	NS	NS	NS	NS	NS	NS	NS	NS	NS	intergenic	NUP214,FAM78A
11	101444855	NS	NS	NS	7.97024e-07	NS	NS	NS	NS	NS	NS	NS	NS	NS	NS	NS	NS	intergenic	NUP214,FAM78A
11	101445734	NS	NS	NS	2.17405e-07	NS	NS	NS	NS	NS	NS	NS	NS	NS	NS	NS	NS	intergenic	NUP214,FAM78A
11	101507155	NS	NS	NS	NS	4.57454e-07	NS	NS	NS	NS	NS	NS	NS	NS	NS	NS	NS	intergenic	PLPP7,PRRC2B
11	101507629	NS	3.30679e-09	NS	1.11136e-07	1.81415e-07	2.8774e-08	NS	NS	NS	NS	NS	NS	NS	NS	NS	2.16369e-07	intergenic	PLPP7,PRRC2B
11	101510541	NS	4.99216e-08	NS	5.72636e-09	4.47356e-08	1.74127e-08	NS	NS	NS	6.32861e-07	2.33961e-07	NS	NS	NS	NS	1.20054e-08	intergenic	PLPP7,PRRC2B
12	822850	NS	5.69235e-07	2.97586e-07	NS	6.26733e-07	1.93783e-07	NS	NS	NS	NS	NS	NS	NS	NS	NS	NS	intergenic	PCDH20,TDRD3
12	4075046	NS	1.02347e-09	NS	2.18303e-09	2.34476e-10	2.1337e-10	NS	NS	NS	NS	NS	NS	NS	NS	NS	1.72786e-07	intergenic	DIAPH3,TRNAS-GGA
12	4075051	NS	1.02347e-09	NS	2.18303e-09	2.34476e-10	2.1337e-10	NS	NS	NS	NS	NS	NS	NS	NS	NS	1.72786e-07	intergenic	DIAPH3,TRNAS-GGA
12	6187387	NS	NS	3.33597e-07	NS	NS	NS	NS	NS	NS	NS	NS	NS	NS	NS	NS	NS	intergenic	PCDH17,NONE
12	7712581	NS	2.36956e-07	NS	NS	NS	NS	NS	NS	NS	NS	NS	NS	NS	NS	NS	NS	intergenic	NONE,LOC101905933
12	7737189	NS	8.20577e-07	NS	NS	NS	NS	NS	NS	NS	NS	NS	NS	NS	NS	NS	NS	intergenic	NONE,LOC101905933
12	7838757	NS	NS	NS	6.86489e-07	NS	NS	NS	NS	NS	NS	NS	NS	NS	NS	NS	NS	intergenic	NONE,LOC101905933
12	7963110	NS	NS	NS	NS	5.23347e-07	6.92359e-07	NS	NS	NS	NS	NS	NS	NS	NS	NS	NS	intergenic	NONE,LOC101905933
12	7991827	NS	1.86286e-07	NS	3.01904e-07	1.51794e-08	3.45549e-08	NS	NS	NS	NS	NS	NS	NS	NS	NS	NS	intergenic	NONE,LOC101905933
12	7992434	NS	5.95015e-08	NS	1.86271e-07	4.44088e-07	1.13225e-07	NS	NS	NS	NS	NS	NS	NS	NS	NS	NS	intergenic	NONE,LOC101905933
12	8033016	NS	9.2539e-07	NS	5.83377e-07	8.10457e-08	1.60351e-07	NS	NS	NS	NS	NS	NS	NS	NS	NS	7.52105e-07	intergenic	NONE,LOC101905933
12	8039882	NS	3.64036e-08	NS	6.47293e-08	1.31857e-08	1.13471e-08	NS	NS	NS	NS	NS	NS	NS	NS	NS	NS	intergenic	NONE,LOC101905933
12	11846636	NS	3.19005e-07	NS	2.3905e-07	1.75613e-07	9.87233e-08	NS	NS	NS	NS	NS	NS	NS	NS	NS	NS	intronic	VWA8
12	11846650	NS	2.25328e-07	NS	1.30062e-07	8.88307e-08	5.42134e-08	NS	NS	NS	NS	NS	NS	NS	NS	NS	NS	intronic	VWA8
12	12070058	NS	6.56821e-08	NS	3.45691e-07	8.43748e-07	1.95063e-07	NS	NS	NS	NS	NS	NS	NS	NS	NS	NS	intronic	VWA8
12	12134125	NS	2.24666e-07	NS	NS	NS	NS	NS	NS	NS	NS	NS	NS	NS	NS	NS	NS	intergenic	VWA8,DGKH
12	12185741	NS	8.12156e-07	NS	NS	NS	NS	NS	NS	NS	NS	NS	NS	NS	NS	NS	NS	intronic	DGKH
12	13307958	NS	NS	NS	NS	NS	NS	NS	NS	NS	NS	NS	6.47342e-07	NS	NS	NS	NS	intergenic	DNAJC15,ENOX1
12	13440082	NS	6.64302e-07	NS	NS	NS	NS	NS	NS	NS	NS	4.61394e-07	7.73838e-07	NS	NS	NS	2.85998e-07	intronic	ENOX1
12	13472422	NS	NS	5.50492e-07	NS	NS	NS	NS	NS	NS	NS	NS	NS	NS	NS	NS	NS	intronic	ENOX1
12	18394701	NS	6.63678e-07	NS	6.18597e-07	1.08194e-08	4.57634e-08	NS	NS	NS	NS	NS	NS	NS	NS	NS	NS	intergenic	RCBTB2,CYSLTR2
12	18754508	NS	NS	NS	NS	NS	NS	NS	NS	NS	NS	1.22851e-07	9.22788e-08	NS	NS	NS	8.25347e-07	intronic	FNDC3A
12	18776258	NS	NS	NS	NS	NS	NS	NS	NS	NS	NS	6.50775e-09	1.06466e-08	NS	NS	NS	9.28597e-08	intronic	FNDC3A
12	22228961	NS	NS	NS	NS	5.66497e-07	NS	NS	NS	NS	NS	NS	NS	NS	NS	NS	NS	intergenic	FOXO1,COG6
12	22253539	NS	NS	NS	NS	4.32144e-07	NS	NS	NS	NS	NS	NS	NS	NS	NS	NS	NS	intergenic	FOXO1,COG6
12	22257149	NS	NS	NS	NS	5.54148e-07	NS	NS	NS	NS	NS	NS	NS	NS	NS	NS	NS	intergenic	FOXO1,COG6
12	23609721	NS	NS	8.63395e-07	NS	NS	NS	NS	NS	NS	NS	NS	NS	NS	NS	NS	NS	intergenic	FREM2,UFM1
12	23724475	NS	NS	6.65835e-07	NS	9.79802e-07	NS	NS	NS	NS	NS	NS	NS	NS	NS	NS	NS	intergenic	UFM1,TRPC4
12	23724665	NS	NS	6.56438e-08	NS	NS	NS	NS	NS	NS	NS	NS	NS	NS	NS	NS	NS	intergenic	UFM1,TRPC4
12	25395101	NS	NS	NS	5.48348e-07	NS	NS	NS	NS	NS	NS	NS	NS	NS	NS	NS	NS	intronic	DCLK1
12	25722016	NS	NS	NS	1.73021e-07	1.86996e-08	7.27039e-08	NS	NS	NS	NS	NS	NS	NS	NS	NS	7.03012e-07	intergenic	DCLK1,NBEA
12	25853512	NS	NS	NS	NS	NS	NS	NS	NS	7.69751e-07	NS	NS	NS	NS	NS	NS	NS	intronic	NBEA
12	27088852	NS	NS	NS	NS	1.25789e-07	NS	NS	NS	NS	NS	NS	NS	NS	NS	NS	NS	intergenic	TRNAC-GCA,RFC3
12	27425399	NS	NS	4.01814e-07	NS	NS	NS	NS	NS	NS	NS	NS	NS	NS	NS	NS	NS	intergenic	RFC3,STARD13
12	27425404	NS	NS	6.06052e-07	NS	NS	NS	NS	NS	NS	NS	NS	NS	NS	NS	NS	NS	intergenic	RFC3,STARD13
12	29136002	NS	NS	NS	NS	7.83605e-07	NS	NS	NS	NS	NS	NS	NS	NS	NS	NS	NS	intergenic	FRY,RXFP2
12	49866012	NS	NS	NS	NS	7.01254e-07	9.26615e-07	NS	NS	NS	NS	NS	NS	NS	NS	NS	NS	intergenic	KLF12,TRNAY-AUA
12	49866022	NS	NS	NS	NS	7.01254e-07	9.26615e-07	NS	NS	NS	NS	NS	NS	NS	NS	NS	NS	intergenic	KLF12,TRNAY-AUA
12	51653088	NS	NS	NS	NS	NS	NS	NS	NS	NS	NS	NS	NS	NS	5.59053e-07	NS	NS	intergenic	LMO7,KCTD12
12	63149662	NS	NS	NS	NS	NS	NS	NS	NS	NS	NS	NS	NS	NS	5.10554e-07	NS	NS	intergenic	SLITRK5,NONE
12	80776221	NS	NS	NS	NS	NS	NS	NS	NS	NS	NS	NS	1.25097e-07	NS	NS	NS	NS	intergenic	TRNAF-GAA,EFNB2
12	80776243	NS	NS	NS	NS	NS	NS	NS	NS	NS	NS	NS	2.73235e-07	NS	NS	NS	NS	intergenic	TRNAF-GAA,EFNB2
12	80776258	NS	NS	NS	NS	NS	NS	NS	NS	NS	NS	NS	3.44715e-07	NS	NS	NS	NS	intergenic	TRNAF-GAA,EFNB2
12	81288896	NS	NS	NS	NS	NS	NS	NS	NS	5.18822e-07	NS	NS	NS	NS	NS	NS	NS	intergenic	TRNAF-GAA,EFNB2
12	81288925	NS	NS	NS	NS	NS	NS	NS	NS	8.53236e-07	NS	NS	NS	NS	NS	NS	NS	intergenic	TRNAF-GAA,EFNB2
12	84955321	NS	6.03612e-08	NS	NS	NS	NS	NS	NS	NS	NS	NS	NS	NS	NS	NS	NS	intronic	COL4A1
13	898743	NS	NS	NS	6.492e-07	NS	NS	NS	NS	NS	NS	NS	NS	NS	NS	NS	NS	intergenic	TMX4,PLCB1
13	1231804	NS	NS	NS	9.77077e-07	NS	NS	NS	NS	NS	NS	NS	NS	NS	NS	NS	NS	intronic	PLCB1
13	2163950	NS	3.50008e-07	NS	3.62682e-09	5.5273e-08	2.9249e-08	NS	NS	NS	NS	NS	NS	NS	NS	NS	NS	intronic	PLCB4
13	2839215	NS	8.55974e-07	NS	NS	NS	NS	NS	NS	NS	NS	NS	NS	NS	NS	NS	NS	intronic	PAK5
13	3356161	NS	NS	NS	3.74067e-07	NS	NS	NS	NS	NS	NS	NS	NS	NS	NS	NS	NS	intergenic	ANKEF1,SNAP25
13	5770971	NS	NS	NS	NS	4.71966e-07	7.30308e-07	NS	NS	NS	7.2437e-07	NS	NS	NS	NS	NS	NS	intronic	LOC107133022
13	14442183	NS	8.68835e-07	NS	3.12887e-08	1.64546e-08	4.56967e-08	NS	NS	NS	NS	NS	NS	NS	NS	NS	NS	intergenic	CELF2,GATA3
13	15874629	NS	NS	NS	NS	9.42582e-07	NS	NS	NS	NS	NS	NS	NS	NS	NS	NS	NS	intergenic	NONE,GATA3
13	15887927	NS	1.45786e-07	NS	8.64781e-07	1.49364e-07	1.16384e-07	NS	NS	NS	NS	NS	NS	NS	NS	NS	6.36159e-07	intergenic	NONE,GATA3
13	28599381	NS	NS	NS	NS	NS	NS	NS	NS	1.23544e-07	NS	NS	NS	NS	NS	NS	NS	intronic	FRMD4A
13	30880731	NS	NS	NS	NS	NS	NS	NS	NS	NS	NS	NS	NS	NS	NS	NS	9.08398e-07	intergenic	MINDY3,PTER
13	30881787	NS	NS	NS	NS	1.53414e-07	3.68971e-07	NS	NS	NS	NS	NS	NS	NS	NS	NS	NS	intergenic	MINDY3,PTER
13	30881794	NS	NS	NS	NS	1.53414e-07	3.68971e-07	NS	NS	NS	NS	NS	NS	NS	NS	NS	NS	intergenic	MINDY3,PTER
13	36639669	NS	NS	NS	5.62497e-07	2.86566e-07	3.66374e-07	NS	NS	NS	NS	NS	NS	NS	NS	NS	NS	intronic	ARMC4
13	36657816	NS	3.28761e-09	1.15339e-07	7.88636e-12	2.69176e-11	4.20064e-11	NS	NS	NS	NS	5.12593e-07	NS	NS	NS	NS	7.60834e-09	intronic	ARMC4
13	36657818	NS	3.28761e-09	1.15339e-07	7.88636e-12	2.69176e-11	4.20064e-11	NS	NS	NS	NS	5.12593e-07	NS	NS	NS	NS	7.60834e-09	intronic	ARMC4
13	37243773	NS	NS	NS	6.52704e-07	NS	NS	NS	NS	NS	NS	NS	NS	NS	NS	NS	NS	intergenic	PTCHD3,PCSK2
13	37671094	NS	NS	NS	NS	9.44844e-07	NS	NS	NS	NS	NS	NS	NS	NS	NS	NS	NS	intronic	PCSK2
13	39599350	NS	NS	NS	NS	NS	NS	NS	NS	NS	NS	9.88423e-07	NS	NS	NS	NS	NS	intronic	NAA20
13	41494755	NS	NS	NS	6.8637e-07	NS	NS	NS	NS	NS	NS	NS	NS	NS	NS	NS	NS	intergenic	PAX1,FOXA2
13	41496819	NS	NS	NS	1.19585e-07	NS	NS	NS	NS	NS	NS	NS	NS	NS	NS	NS	1.65789e-07	intergenic	PAX1,FOXA2
13	44731986	NS	NS	NS	NS	9.61219e-07	6.61496e-07	NS	NS	NS	NS	NS	NS	NS	NS	NS	NS	intergenic	KLF6,LOC112449302
13	44797972	NS	8.43277e-07	NS	5.37457e-08	NS	3.87392e-07	NS	NS	NS	NS	NS	NS	NS	NS	NS	3.12157e-07	intergenic	KLF6,LOC112449302
13	45281950	NS	NS	NS	NS	NS	NS	NS	NS	NS	NS	NS	NS	NS	NS	NS	8.24136e-07	intergenic	PFKP,ADARB2
13	45281964	NS	NS	NS	NS	NS	NS	NS	NS	NS	NS	NS	NS	NS	NS	NS	8.24136e-07	intergenic	PFKP,ADARB2
13	45530617	NS	NS	NS	NS	7.08368e-07	NS	NS	NS	NS	NS	NS	NS	NS	NS	NS	NS	intergenic	PFKP,ADARB2
13	46941224	NS	NS	NS	2.49946e-07	4.9183e-07	9.95872e-07	NS	NS	NS	NS	NS	NS	NS	NS	NS	NS	intergenic	ZMYND11,PRNP
13	47107678	NS	NS	NS	NS	4.19108e-07	NS	NS	NS	NS	NS	4.90365e-07	NS	NS	NS	NS	6.26058e-07	intergenic	PRND,RASSF2
13	47112446	NS	NS	NS	NS	4.18342e-07	NS	NS	NS	NS	NS	NS	NS	NS	NS	NS	NS	intergenic	PRND,RASSF2
13	47113974	NS	NS	NS	NS	6.04002e-07	NS	NS	NS	NS	NS	NS	NS	NS	NS	NS	NS	intergenic	PRND,RASSF2
13	47164499	NS	NS	NS	3.73587e-07	5.32014e-07	5.07441e-07	NS	NS	NS	NS	NS	NS	NS	NS	NS	NS	intronic	RASSF2
13	47172906	NS	8.57464e-07	NS	NS	3.53556e-07	3.50374e-07	NS	NS	NS	NS	NS	NS	NS	NS	NS	NS	intronic	RASSF2
13	47249564	NS	NS	NS	NS	3.18167e-07	4.19239e-07	NS	NS	NS	NS	NS	NS	NS	NS	NS	NS	intronic	SLC23A2
13	47524610	NS	NS	NS	NS	4.21934e-07	7.67852e-07	NS	NS	NS	NS	NS	NS	NS	NS	NS	NS	intergenic	CDS2,LOC787679
13	47545559	NS	NS	NS	NS	3.18647e-07	7.19003e-07	NS	NS	NS	NS	NS	NS	NS	NS	NS	NS	downstream	LOC787679
13	47572546	NS	NS	NS	NS	3.31451e-07	7.24939e-07	NS	NS	NS	NS	NS	NS	NS	NS	NS	NS	intergenic	PROKR2,GPCPD1
13	49228775	NS	NS	NS	6.39366e-07	6.29005e-07	NS	NS	NS	NS	2.76823e-07	8.12715e-07	NS	NS	NS	NS	6.08825e-07	intergenic	BMP2,HAO1
13	50358664	NS	NS	NS	7.32239e-07	4.85228e-07	7.02166e-07	NS	NS	NS	NS	NS	NS	NS	NS	NS	NS	intergenic	BMP2,HAO1
13	52803092	NS	NS	NS	5.90057e-07	NS	NS	NS	NS	NS	NS	NS	NS	NS	NS	NS	NS	intronic	TGM3
13	52862824	NS	NS	NS	6.24753e-07	NS	NS	NS	NS	NS	2.85548e-07	8.45818e-07	NS	NS	NS	NS	NS	intergenic	TGM3,STK35
13	54166819	NS	NS	NS	5.99527e-07	3.24427e-07	3.47256e-07	NS	NS	NS	NS	NS	NS	NS	NS	NS	NS	intergenic	EEF1A2,KCNQ2
13	56788623	NS	NS	NS	9.68998e-07	NS	NS	NS	NS	NS	NS	NS	NS	NS	NS	NS	NS	intergenic	PHACTR3,EDN3
13	57020022	3.91178e-07	NS	NS	NS	NS	NS	NS	NS	NS	NS	NS	NS	NS	NS	NS	NS	intergenic	PHACTR3,EDN3
13	58815193	NS	NS	NS	2.08267e-07	1.42259e-07	2.75225e-07	NS	NS	NS	NS	NS	NS	NS	NS	NS	NS	intronic	SPO11
13	59849190	NS	NS	NS	NS	6.06238e-07	7.63705e-07	NS	NS	NS	NS	NS	NS	NS	NS	NS	NS	intronic	SNPH
13	59866741	NS	NS	NS	7.35575e-07	2.11988e-07	5.11087e-07	NS	NS	NS	NS	NS	NS	NS	NS	NS	NS	intergenic	SNPH,RAD21L1
13	62707893	NS	NS	NS	NS	NS	NS	NS	NS	4.34523e-07	NS	NS	NS	NS	NS	NS	NS	exonic	BPIFA3
13	67223679	NS	NS	NS	NS	NS	NS	NS	NS	1.49186e-07	NS	NS	NS	NS	NS	NS	NS	intronic	LBP
13	69246772	NS	NS	NS	NS	NS	NS	NS	NS	6.89456e-07	NS	NS	NS	NS	NS	NS	NS	intergenic	TRNAR-UCU,LOC101907117
13	70665904	NS	8.32503e-08	NS	5.85204e-08	2.80606e-07	7.3829e-08	NS	NS	NS	NS	NS	NS	NS	NS	NS	NS	intergenic	CHD6,PTPRT
13	70676233	NS	NS	NS	NS	9.36213e-08	2.41952e-07	NS	NS	NS	NS	NS	NS	NS	NS	NS	NS	intergenic	CHD6,PTPRT
13	70677960	NS	1.76263e-07	NS	2.4937e-07	7.90144e-09	2.88752e-08	NS	NS	NS	NS	NS	NS	NS	NS	NS	NS	intergenic	CHD6,PTPRT
13	70678756	NS	NS	NS	NS	NS	9.22776e-07	NS	NS	NS	NS	NS	NS	NS	NS	NS	NS	intergenic	CHD6,PTPRT
13	70695177	NS	1.82677e-07	NS	3.2964e-08	3.28008e-09	9.84338e-09	NS	NS	NS	NS	NS	NS	NS	NS	NS	7.43845e-07	intergenic	CHD6,PTPRT
13	70856902	NS	NS	NS	NS	NS	NS	NS	6.68176e-07	NS	NS	NS	NS	NS	NS	NS	NS	intronic	PTPRT
13	70857571	NS	NS	NS	NS	NS	NS	NS	5.12364e-07	NS	NS	NS	NS	NS	NS	NS	NS	intronic	PTPRT
13	73454864	NS	NS	NS	1.30546e-07	3.46728e-07	5.18772e-07	NS	NS	NS	NS	NS	NS	NS	NS	NS	NS	intronic	STK4
13	74128269	NS	NS	NS	3.11165e-07	NS	5.2447e-07	NS	NS	NS	NS	NS	NS	NS	NS	NS	7.05683e-07	intergenic	TKDP4,TKDP2
13	74147801	NS	3.26723e-08	NS	5.08855e-08	6.76522e-08	2.5589e-08	NS	NS	NS	NS	NS	NS	NS	NS	NS	7.19498e-07	intronic	TKDP2
13	74168208	NS	3.95288e-07	NS	NS	8.24201e-08	1.36264e-07	NS	NS	NS	NS	NS	NS	NS	NS	NS	NS	intergenic	TKDP2,LOC404061
13	74540960	NS	NS	NS	NS	7.33321e-07	7.6826e-07	NS	NS	NS	NS	NS	NS	NS	NS	NS	NS	intergenic	LOC104973896,WFDC3
13	74596969	NS	NS	NS	NS	9.0721e-07	NS	NS	NS	NS	NS	NS	NS	NS	NS	NS	NS	UTR3	TNNC2
13	74599516	NS	NS	NS	NS	7.83433e-07	9.65357e-07	NS	NS	NS	NS	NS	NS	NS	NS	NS	NS	intronic	TNNC2
13	74604050	NS	NS	NS	NS	8.62808e-07	8.32203e-07	NS	NS	NS	NS	NS	NS	NS	NS	NS	NS	intronic	SNX21
13	74614752	NS	7.58631e-07	NS	2.39301e-07	1.09129e-07	1.11205e-07	NS	NS	NS	NS	NS	NS	NS	NS	NS	NS	intronic	ACOT8
13	74615449	NS	9.27276e-08	NS	1.80943e-08	4.91044e-09	7.46758e-09	NS	NS	NS	NS	NS	NS	NS	NS	NS	NS	intronic	ACOT8
13	74616721	NS	NS	NS	NS	6.14687e-07	6.99598e-07	NS	NS	NS	NS	NS	NS	NS	NS	NS	NS	intronic	ACOT8
13	74619668	NS	NS	NS	NS	4.27319e-07	5.48614e-07	NS	NS	NS	NS	NS	NS	NS	NS	NS	NS	intronic	ACOT8
13	74624345	NS	NS	NS	9.56456e-07	4.19504e-07	4.19568e-07	NS	NS	NS	NS	NS	NS	NS	NS	NS	NS	intronic	ZSWIM3
13	74624657	NS	7.82908e-07	NS	1.879e-07	6.42543e-08	8.46118e-08	NS	NS	NS	NS	NS	NS	NS	NS	NS	NS	intronic	ZSWIM3
13	74626356	NS	3.01735e-07	NS	1.00457e-07	3.59899e-08	4.58968e-08	NS	NS	NS	NS	NS	NS	NS	NS	NS	NS	intronic	ZSWIM3
13	74629175	NS	NS	NS	NS	NS	9.14516e-07	NS	NS	NS	NS	NS	NS	NS	NS	NS	NS	intronic	ZSWIM3
13	74631631	NS	NS	NS	NS	6.66406e-07	NS	NS	NS	NS	NS	NS	NS	NS	NS	NS	NS	intronic	ZSWIM3
13	74632602	NS	NS	NS	2.92373e-07	8.53956e-08	1.16869e-07	NS	NS	NS	NS	NS	NS	NS	NS	NS	NS	intronic	ZSWIM3
13	74635854	NS	9.03429e-07	NS	2.0658e-07	5.90031e-08	9.86806e-08	NS	NS	NS	NS	NS	NS	NS	NS	NS	NS	intronic	ZSWIM3
13	74636098	NS	NS	NS	NS	9.42267e-07	NS	NS	NS	NS	NS	NS	NS	NS	NS	NS	NS	intronic	ZSWIM3
13	74636192	NS	NS	NS	NS	9.85957e-07	NS	NS	NS	NS	NS	NS	NS	NS	NS	NS	NS	intronic	ZSWIM3
13	74644222	NS	9.50266e-07	NS	2.74354e-07	1.20821e-07	1.32211e-07	NS	NS	NS	NS	NS	NS	NS	NS	NS	NS	downstream	SPATA25,ZSWIM1
13	74646167	NS	NS	NS	7.72184e-07	3.40122e-07	4.09574e-07	NS	NS	NS	NS	NS	NS	NS	NS	NS	NS	UTR3	NEURL2
13	74648163	NS	NS	NS	6.40109e-07	2.98083e-07	3.66975e-07	NS	NS	NS	NS	NS	NS	NS	NS	NS	NS	exonic	NEURL2
13	74698010	NS	3.15917e-07	8.2894e-07	8.57122e-08	8.72922e-07	1.78962e-07	NS	NS	NS	NS	NS	NS	NS	NS	NS	6.9977e-07	UTR3	PCIF1,ZNF335
13	74787662	NS	5.07676e-07	NS	NS	4.76849e-07	3.68835e-07	NS	NS	NS	NS	NS	NS	NS	NS	NS	NS	intronic	SLC12A5
13	75303679	NS	8.45988e-07	NS	2.16634e-07	2.68881e-07	1.96442e-07	NS	NS	NS	NS	NS	NS	NS	NS	NS	NS	intronic	SLC13A3
13	75307384	NS	NS	NS	2.14963e-07	NS	5.05698e-07	NS	NS	NS	NS	NS	NS	NS	NS	NS	6.49897e-07	intronic	SLC13A3
13	75314877	NS	3.9687e-08	NS	4.61334e-09	1.95261e-09	2.16894e-09	NS	NS	NS	NS	NS	NS	NS	NS	NS	7.42417e-07	intronic	SLC13A3
13	75315683	NS	2.92989e-07	NS	3.59723e-09	9.67255e-08	3.74719e-08	NS	NS	NS	NS	NS	NS	NS	NS	NS	4.69621e-07	intronic	SLC13A3
13	75330946	NS	NS	NS	2.81388e-08	2.57516e-08	1.13487e-07	NS	NS	NS	NS	NS	NS	NS	NS	NS	NS	intronic	SLC13A3
13	75831146	NS	7.29393e-07	NS	NS	NS	NS	NS	NS	NS	NS	NS	NS	NS	NS	NS	NS	intronic	ZMYND8
13	78788506	NS	8.56784e-07	NS	NS	NS	6.87417e-07	NS	NS	NS	NS	NS	NS	NS	NS	NS	NS	intronic	BCAS4
13	79000122	NS	6.30974e-07	NS	NS	NS	NS	NS	NS	NS	NS	NS	NS	NS	NS	NS	NS	intergenic	KCNG1,TRNAR-UCU
13	79004067	NS	NS	NS	5.27563e-07	2.59201e-07	3.37735e-07	NS	NS	NS	NS	NS	NS	NS	NS	NS	NS	intergenic	KCNG1,TRNAR-UCU
13	79005564	NS	9.71284e-07	NS	NS	NS	NS	NS	NS	NS	NS	NS	NS	NS	NS	NS	NS	intergenic	KCNG1,TRNAR-UCU
13	80421799	NS	7.4698e-11	NS	6.89019e-08	8.92861e-09	1.62417e-09	NS	NS	NS	NS	NS	NS	NS	NS	NS	2.82681e-07	intergenic	ZFP64,TSHZ2
13	80433950	NS	7.31756e-07	NS	NS	3.98927e-07	4.72201e-07	NS	NS	NS	NS	NS	NS	NS	NS	NS	NS	intergenic	ZFP64,TSHZ2
13	80435853	NS	NS	NS	NS	5.22706e-07	NS	NS	NS	NS	NS	NS	NS	NS	NS	NS	NS	intergenic	ZFP64,TSHZ2
13	80460786	NS	4.88939e-07	NS	NS	5.85817e-07	4.73516e-07	NS	NS	NS	NS	NS	NS	NS	NS	NS	NS	intergenic	ZFP64,TSHZ2
13	80460840	NS	NS	NS	NS	6.59925e-07	7.10545e-07	NS	NS	NS	NS	NS	NS	NS	NS	NS	NS	intergenic	ZFP64,TSHZ2
13	80819755	NS	8.03665e-07	NS	NS	NS	NS	NS	NS	NS	NS	NS	NS	NS	NS	NS	NS	intronic	TSHZ2
13	81243465	NS	1.55985e-08	1.04634e-07	2.36625e-08	5.82277e-10	1.08888e-09	NS	NS	NS	NS	NS	NS	NS	NS	NS	9.36037e-07	intergenic	ZNF217,BCAS1
13	81250137	NS	NS	1.09407e-08	NS	2.77619e-07	4.55926e-07	NS	NS	NS	NS	NS	NS	NS	NS	NS	NS	intergenic	ZNF217,BCAS1
13	81357438	NS	NS	8.03765e-07	NS	NS	NS	NS	NS	NS	NS	NS	NS	NS	NS	NS	NS	intergenic	ZNF217,BCAS1
13	81496682	NS	2.76906e-07	1.55806e-08	5.30888e-08	1.62855e-08	1.87923e-08	NS	NS	NS	NS	NS	NS	NS	NS	NS	9.61963e-08	intergenic	BCAS1,CYP24A1
13	82641414	NS	NS	NS	NS	8.23524e-07	NS	NS	NS	NS	NS	NS	NS	NS	NS	NS	NS	intergenic	DOK5,TRNAC-GCA
14	8857868	NS	NS	NS	NS	NS	NS	NS	NS	NS	NS	NS	2.69e-07	NS	NS	NS	NS	intronic	KCNQ3
14	9209796	NS	NS	2.97328e-07	NS	NS	NS	NS	NS	NS	NS	NS	NS	NS	NS	NS	NS	intergenic	EFR3A,ADCY8
14	9310223	4.01705e-07	NS	NS	NS	NS	NS	NS	NS	NS	NS	NS	NS	NS	NS	NS	NS	intergenic	EFR3A,ADCY8
14	9328447	NS	NS	2.89037e-07	NS	NS	NS	NS	NS	NS	NS	NS	NS	NS	NS	NS	NS	intergenic	EFR3A,ADCY8
14	10910948	7.07456e-07	NS	NS	NS	NS	NS	NS	NS	NS	NS	NS	NS	NS	NS	NS	NS	intergenic	GSDMC,LOC100299192
14	11626687	NS	NS	NS	NS	NS	NS	NS	NS	NS	NS	NS	7.0685e-07	NS	NS	NS	NS	intergenic	LOC100299192,TRNAC-GCA
14	12947336	NS	NS	NS	NS	NS	NS	NS	NS	NS	NS	5.02526e-08	1.38482e-08	NS	NS	NS	9.68707e-08	intergenic	MYC,MIR2310
14	16214621	NS	NS	6.16279e-07	NS	NS	NS	NS	NS	NS	NS	NS	NS	NS	NS	NS	NS	intergenic	LOC112449619,KLHL38
14	17173593	NS	NS	NS	NS	NS	NS	NS	NS	NS	NS	NS	NS	4.33987e-07	NS	NS	NS	intergenic	ZHX2,LOC522769
14	17315756	NS	NS	NS	NS	NS	NS	NS	NS	NS	NS	NS	3.59069e-07	NS	NS	NS	NS	intergenic	ZHX2,LOC522769
14	17344163	NS	NS	NS	NS	NS	NS	NS	NS	NS	NS	NS	NS	6.18532e-08	NS	NS	NS	intergenic	ZHX2,LOC522769
14	17494830	NS	NS	NS	NS	NS	NS	NS	NS	NS	NS	NS	NS	NS	1.79082e-07	NS	NS	intergenic	ZHX2,LOC522769
14	17494889	NS	NS	NS	NS	NS	NS	NS	NS	NS	NS	NS	NS	NS	4.35259e-07	NS	NS	intergenic	ZHX2,LOC522769
14	17494890	NS	NS	NS	NS	NS	NS	NS	NS	NS	NS	NS	NS	NS	4.35259e-07	NS	NS	intergenic	ZHX2,LOC522769
14	17497808	NS	NS	NS	NS	NS	NS	NS	NS	NS	NS	NS	NS	NS	8.40411e-07	NS	NS	intergenic	ZHX2,LOC522769
14	17497814	NS	NS	NS	NS	NS	NS	NS	NS	NS	NS	NS	NS	NS	2.6325e-07	NS	NS	intergenic	ZHX2,LOC522769
14	17696821	NS	NS	NS	NS	NS	NS	NS	NS	NS	NS	NS	NS	NS	1.40543e-08	NS	NS	intergenic	ZHX2,LOC522769
14	17697849	NS	NS	NS	NS	NS	NS	NS	NS	NS	NS	NS	NS	NS	3.80174e-07	NS	NS	intergenic	ZHX2,LOC522769
14	18676534	NS	NS	NS	NS	NS	NS	NS	NS	NS	NS	4.31337e-07	2.92307e-07	NS	NS	NS	NS	intergenic	TRNAM-CAU,LOC529047
14	19074379	NS	NS	NS	NS	NS	NS	NS	NS	NS	NS	NS	NS	NS	6.62783e-07	NS	NS	intergenic	LOC100297500,LOC100847223
14	19077868	NS	NS	NS	NS	NS	NS	NS	NS	NS	NS	NS	NS	NS	3.35904e-07	NS	NS	intergenic	LOC100297500,LOC100847223
14	19106551	NS	NS	6.51829e-07	NS	NS	NS	NS	NS	NS	NS	NS	NS	NS	NS	NS	NS	intronic	LOC100847223
14	20608307	NS	NS	NS	NS	NS	NS	NS	NS	NS	NS	NS	NS	6.98235e-07	NS	NS	NS	intronic	SNTG1
14	28229529	NS	NS	NS	NS	NS	NS	NS	NS	NS	NS	8.57865e-07	NS	NS	NS	NS	NS	intergenic	YTHDF3,MIR124A-2
14	28612358	NS	NS	NS	6.03525e-07	NS	NS	NS	NS	NS	NS	NS	NS	NS	NS	NS	NS	intergenic	YTHDF3,MIR124A-2
14	28891740	NS	NS	NS	9.06854e-07	NS	NS	NS	NS	NS	NS	NS	NS	NS	NS	NS	NS	intergenic	YTHDF3,MIR124A-2
14	28912463	NS	1.18734e-07	NS	NS	NS	7.9433e-07	NS	NS	NS	NS	NS	NS	NS	NS	NS	NS	intergenic	YTHDF3,MIR124A-2
14	29288849	NS	9.05995e-07	NS	8.79345e-07	NS	NS	NS	NS	NS	NS	NS	NS	NS	NS	NS	NS	UTR3	CYP7B1
14	29288857	NS	9.05995e-07	NS	8.79345e-07	NS	NS	NS	NS	NS	NS	NS	NS	NS	NS	NS	NS	UTR3	CYP7B1
14	32488227	NS	NS	NS	NS	NS	NS	NS	NS	NS	NS	NS	6.46932e-07	NS	NS	NS	NS	intronic	C14H8orf34
14	33654052	NS	NS	NS	NS	NS	NS	NS	NS	NS	NS	2.43062e-07	NS	NS	NS	NS	NS	intergenic	SLCO5A1,TRNAG-CCC
14	33760738	NS	NS	NS	NS	NS	NS	NS	NS	NS	NS	3.64888e-08	5.9326e-07	NS	NS	NS	NS	intergenic	TRNAG-CCC,PRDM14
14	34528713	NS	NS	NS	NS	NS	NS	NS	NS	NS	NS	3.76278e-07	NS	NS	NS	NS	NS	intergenic	XKR9,EYA1
14	34990122	NS	NS	NS	NS	NS	NS	NS	NS	NS	NS	NS	8.6748e-07	NS	NS	NS	NS	intronic	EYA1
14	34990615	NS	NS	NS	NS	NS	NS	NS	NS	NS	NS	NS	2.34519e-08	NS	NS	NS	NS	intronic	EYA1
14	36012146	NS	NS	NS	NS	NS	NS	NS	NS	NS	NS	NS	5.99961e-07	NS	NS	NS	NS	intronic	KCNB2
14	36255299	NS	NS	NS	NS	NS	NS	NS	NS	NS	NS	6.03853e-07	NS	NS	NS	NS	NS	intronic	KCNB2
14	36473554	NS	NS	NS	NS	NS	NS	NS	NS	NS	NS	1.59936e-07	NS	NS	NS	NS	NS	intergenic	SBSPON,C14H8orf89
14	36473555	NS	NS	NS	NS	NS	NS	NS	NS	NS	NS	1.59936e-07	NS	NS	NS	NS	NS	intergenic	SBSPON,C14H8orf89
14	36484571	NS	NS	NS	NS	NS	NS	NS	NS	NS	NS	2.36026e-08	NS	NS	NS	NS	NS	intergenic	SBSPON,C14H8orf89
14	37324822	NS	NS	NS	NS	NS	NS	NS	NS	NS	NS	9.4602e-07	NS	NS	NS	NS	NS	intergenic	LY96,TRNAE-UUC
14	37324824	NS	NS	NS	NS	NS	NS	NS	NS	NS	NS	9.4602e-07	NS	NS	NS	NS	NS	intergenic	LY96,TRNAE-UUC
14	37324840	NS	NS	NS	NS	NS	NS	NS	NS	NS	NS	NS	6.46161e-07	NS	NS	NS	NS	intergenic	LY96,TRNAE-UUC
14	37348786	NS	3.23121e-07	NS	NS	NS	NS	NS	NS	NS	NS	2.70942e-07	NS	NS	NS	NS	NS	intergenic	TRNAE-UUC,JPH1
14	38607741	NS	NS	NS	NS	NS	NS	NS	NS	NS	NS	6.39475e-07	NS	NS	NS	NS	NS	intergenic	CRISPLD1,HNF4G
14	38610034	NS	NS	NS	NS	NS	NS	NS	NS	NS	NS	5.09406e-07	3.05968e-07	NS	NS	NS	NS	intergenic	CRISPLD1,HNF4G
14	47219872	NS	7.02258e-07	NS	1.99893e-07	1.15743e-07	1.16394e-07	NS	NS	NS	NS	NS	NS	NS	NS	NS	NS	intergenic	SLC30A8,AARD
14	47313006	NS	NS	9.75008e-07	NS	NS	NS	NS	NS	NS	NS	NS	NS	NS	NS	NS	NS	intergenic	SLC30A8,AARD
14	49009759	NS	NS	1.65247e-07	1.8212e-07	5.82207e-08	1.58972e-07	NS	NS	NS	NS	NS	NS	NS	NS	NS	NS	intergenic	TRPS1,CSMD3
14	49881536	NS	NS	8.77431e-08	NS	NS	NS	NS	NS	NS	NS	NS	NS	NS	NS	NS	NS	intergenic	TRPS1,CSMD3
14	49881702	NS	NS	3.45402e-07	NS	NS	NS	NS	NS	NS	NS	NS	NS	NS	NS	NS	NS	intergenic	TRPS1,CSMD3
14	49881751	NS	NS	6.8052e-07	NS	NS	NS	NS	NS	NS	NS	NS	NS	NS	NS	NS	NS	intergenic	TRPS1,CSMD3
14	49954227	NS	3.43177e-08	4.24317e-07	2.4062e-09	2.43239e-08	8.83458e-09	NS	NS	NS	NS	3.89239e-07	NS	NS	NS	NS	3.63219e-08	intergenic	TRPS1,CSMD3
14	49956726	NS	8.94464e-10	4.82338e-07	9.8225e-10	5.40325e-11	9.28111e-11	NS	NS	NS	NS	NS	NS	NS	NS	NS	2.46799e-08	intergenic	TRPS1,CSMD3
14	50477166	NS	2.25721e-07	NS	2.64708e-08	1.68756e-07	8.49257e-08	NS	NS	NS	NS	4.97773e-07	NS	NS	NS	NS	2.3154e-07	intergenic	TRPS1,CSMD3
14	50489962	NS	NS	NS	NS	NS	NS	NS	NS	NS	NS	NS	NS	NS	NS	NS	9.43829e-07	intergenic	TRPS1,CSMD3
14	50489972	NS	NS	NS	NS	NS	NS	NS	NS	NS	NS	NS	NS	NS	NS	NS	9.43829e-07	intergenic	TRPS1,CSMD3
14	50497300	NS	NS	NS	NS	NS	NS	NS	NS	NS	NS	3.08981e-07	NS	NS	NS	NS	NS	intergenic	TRPS1,CSMD3
14	50502032	NS	NS	NS	6.32686e-08	3.11392e-08	1.54508e-07	NS	NS	NS	NS	NS	NS	NS	NS	NS	NS	intergenic	TRPS1,CSMD3
14	51201671	NS	NS	9.38248e-07	NS	NS	NS	NS	NS	NS	NS	NS	NS	NS	NS	NS	NS	intergenic	CSMD3,LOC112449555
14	51425112	NS	NS	1.39115e-08	NS	5.69895e-07	6.96788e-07	NS	NS	NS	NS	NS	NS	NS	NS	NS	NS	intronic	LOC112449555
14	51427476	NS	NS	NS	NS	4.97268e-07	NS	NS	NS	NS	NS	NS	NS	NS	NS	NS	NS	intronic	LOC112449555
14	51427986	NS	NS	1.79954e-08	NS	NS	NS	NS	NS	NS	NS	NS	NS	NS	NS	NS	NS	intronic	LOC112449555
14	51857382	NS	NS	NS	NS	7.53795e-07	NS	NS	NS	NS	NS	NS	NS	NS	NS	NS	NS	intronic	LOC101905320
14	54862403	NS	NS	NS	9.21112e-07	NS	NS	NS	NS	NS	NS	NS	NS	NS	NS	NS	NS	upstream	EBAG9
14	54971050	NS	NS	6.31412e-07	NS	NS	NS	NS	NS	NS	NS	NS	NS	NS	NS	NS	NS	intronic	PKHD1L1
14	54980148	NS	1.47329e-07	4.72452e-07	7.07542e-08	2.17043e-08	1.85079e-08	NS	NS	NS	NS	NS	NS	NS	NS	NS	3.2539e-07	intronic	PKHD1L1
14	55369233	NS	5.43253e-07	NS	NS	NS	NS	NS	NS	NS	NS	NS	NS	NS	NS	NS	NS	intergenic	TRHR,TMEM74
14	56117066	NS	NS	NS	NS	5.76851e-07	NS	NS	NS	NS	NS	NS	NS	NS	NS	NS	NS	intergenic	EMC2,EIF3E
14	56203982	NS	2.91647e-09	NS	4.02624e-09	5.06433e-10	7.10266e-10	NS	NS	NS	NS	3.9324e-07	NS	NS	NS	NS	1.23789e-07	intergenic	EMC2,EIF3E
14	56210879	NS	7.89786e-07	NS	NS	NS	8.34392e-07	NS	NS	NS	NS	NS	NS	NS	NS	NS	9.393e-07	intergenic	EMC2,EIF3E
14	56446919	NS	3.55772e-07	NS	8.59011e-07	4.47092e-07	2.18839e-07	NS	NS	NS	NS	NS	NS	NS	NS	NS	NS	intronic	RSPO2
14	57524894	NS	NS	NS	NS	5.27869e-07	9.86339e-07	NS	NS	NS	NS	NS	NS	NS	NS	NS	5.83902e-07	intergenic	ANGPT1,ABRA
14	57813561	NS	NS	NS	9.42337e-08	NS	8.67522e-07	NS	NS	NS	NS	NS	NS	NS	NS	NS	NS	intergenic	ANGPT1,ABRA
14	58011406	NS	NS	NS	8.03826e-07	5.23193e-07	NS	NS	NS	NS	NS	NS	NS	NS	NS	NS	NS	intronic	OXR1
14	63582260	NS	NS	NS	NS	NS	NS	NS	NS	NS	NS	NS	4.3944e-07	NS	NS	NS	NS	intergenic	YWHAZ,TRNAY-AUA
14	63684839	NS	NS	NS	NS	NS	NS	NS	NS	NS	NS	NS	NS	NS	NS	NS	5.89846e-07	intergenic	PABPC1,SNX31
14	65754107	NS	NS	NS	NS	NS	NS	NS	NS	NS	9.70228e-07	NS	NS	NS	NS	NS	NS	intronic	STK3
14	66772145	NS	NS	NS	NS	7.4798e-07	NS	NS	NS	NS	NS	NS	NS	NS	NS	NS	NS	intergenic	MTDH,TSPYL5
14	70538125	NS	NS	5.78874e-08	NS	NS	NS	NS	NS	NS	NS	NS	NS	NS	NS	NS	NS	intergenic	TMEM67,RBM12B
14	71461709	NS	NS	NS	NS	NS	NS	NS	5.15117e-07	NS	NS	6.63581e-07	5.34788e-07	NS	NS	NS	5.43782e-07	intronic	TRIQK
14	71461762	NS	NS	NS	NS	NS	NS	NS	NS	NS	NS	9.18286e-07	NS	NS	NS	NS	NS	intronic	TRIQK
14	71606369	NS	NS	9.64922e-07	NS	NS	NS	NS	NS	NS	NS	NS	NS	NS	NS	NS	NS	intergenic	TRIQK,RUNX1T1
14	72548252	NS	NS	NS	NS	9.87168e-07	8.21598e-07	NS	NS	NS	NS	NS	NS	NS	NS	NS	NS	intergenic	RUNX1T1,SLC26A7
14	76938880	NS	NS	NS	NS	NS	NS	NS	NS	NS	NS	5.75368e-07	4.55391e-07	NS	NS	NS	NS	intergenic	TRNAS-GGA,LOC100196897
14	78840271	NS	NS	NS	NS	NS	NS	NS	NS	1.21411e-07	NS	NS	NS	NS	NS	NS	NS	intergenic	RALYL,TRNAS-GGA
14	78895947	NS	NS	NS	NS	NS	NS	9.86432e-07	NS	NS	NS	NS	NS	NS	NS	NS	NS	intergenic	TRNAS-GGA,LOC784458
14	78895963	NS	NS	NS	NS	NS	NS	9.86432e-07	NS	NS	NS	NS	NS	NS	NS	NS	NS	intergenic	TRNAS-GGA,LOC784458
14	79230188	NS	NS	NS	NS	NS	NS	NS	NS	NS	NS	NS	7.54163e-07	NS	NS	NS	NS	intergenic	TRNAS-GGA,LOC784458
14	81807888	NS	NS	NS	NS	NS	NS	NS	NS	4.88427e-07	NS	NS	2.97725e-07	NS	NS	NS	NS	intronic	MTBP
14	81824351	NS	NS	NS	NS	NS	NS	NS	NS	NS	NS	NS	6.57388e-07	NS	NS	NS	NS	intronic	MTBP
14	82232971	NS	NS	NS	NS	NS	NS	NS	NS	NS	NS	NS	NS	NS	NS	7.01495e-07	NS	intergenic	SNTB1,SLC2A5
15	18208756	NS	NS	NS	NS	NS	NS	NS	NS	4.54087e-07	NS	NS	NS	NS	NS	NS	NS	intronic	KDELC2
15	48185796	NS	1.55757e-08	NS	1.7257e-07	NS	6.06884e-07	NS	NS	NS	NS	NS	NS	NS	NS	NS	NS	intergenic	OR51I1,LOC516396
15	52707419	NS	7.12307e-07	NS	NS	NS	8.09836e-07	NS	NS	NS	NS	NS	NS	NS	NS	NS	NS	intergenic	FCHSD2,P2RY2
15	58309830	NS	NS	NS	NS	5.39691e-07	NS	NS	NS	NS	NS	NS	NS	NS	NS	NS	NS	intergenic	LIN7C,BDNF
15	68228555	NS	NS	NS	NS	8.92128e-07	9.07289e-07	NS	NS	NS	NS	NS	NS	NS	NS	NS	NS	intergenic	C15H11orf74,NONE
15	69152067	NS	NS	NS	NS	NS	NS	NS	NS	NS	NS	NS	NS	5.67169e-07	NS	NS	NS	intergenic	NONE,LRRC4C
15	72866401	NS	NS	NS	NS	NS	NS	NS	NS	NS	NS	NS	2.72819e-07	NS	NS	NS	NS	intergenic	NONE,API5
15	74945250	NS	NS	NS	NS	NS	NS	NS	NS	NS	NS	7.45941e-07	1.07008e-07	NS	NS	NS	NS	intronic	TSPAN18
15	74945251	NS	NS	NS	NS	NS	NS	NS	NS	NS	NS	7.45941e-07	1.07008e-07	NS	NS	NS	NS	intronic	TSPAN18
15	75184247	NS	NS	NS	NS	NS	NS	NS	NS	NS	NS	9.27498e-07	NS	NS	NS	NS	NS	intergenic	TP53I11,PRDM11
15	75184606	NS	NS	NS	NS	NS	NS	NS	NS	NS	NS	6.70138e-08	9.45183e-08	NS	NS	NS	NS	intergenic	TP53I11,PRDM11
15	75186325	NS	NS	NS	NS	NS	NS	NS	NS	NS	NS	9.51741e-07	NS	NS	NS	NS	NS	intergenic	TP53I11,PRDM11
15	75442984	NS	NS	NS	NS	8.06961e-07	NS	NS	NS	NS	NS	NS	NS	NS	NS	NS	NS	intergenic	SYT13,LOC112441655
15	76378555	NS	NS	NS	NS	NS	NS	NS	NS	NS	NS	NS	NS	NS	1.79993e-07	NS	NS	UTR3	CHRM4
15	76434218	NS	NS	NS	NS	NS	NS	NS	NS	NS	NS	NS	NS	NS	6.13058e-08	NS	NS	intronic	AMBRA1
15	77255183	NS	NS	NS	NS	NS	NS	NS	NS	NS	NS	NS	8.83997e-07	5.07324e-08	1.30077e-07	NS	NS	exonic	PSMC3
15	82222682	NS	NS	NS	NS	NS	NS	NS	1.45077e-07	NS	NS	NS	NS	NS	NS	NS	NS	intergenic	GLYATL2,FAM111B
15	83859433	NS	NS	NS	NS	NS	NS	NS	NS	NS	NS	NS	NS	NS	9.55008e-08	NS	NS	intergenic	B3GAT1,LOC100271685
15	84093055	NS	3.17896e-07	NS	9.0869e-08	7.4565e-08	4.90122e-08	NS	NS	NS	NS	NS	NS	NS	NS	NS	NS	intergenic	LOC100271685,OR4A15
15	84308424	NS	8.12628e-07	NS	6.65037e-07	NS	NS	NS	NS	NS	NS	NS	NS	NS	NS	NS	NS	intergenic	LOC112441559,LOC788572
15	84443704	NS	NS	NS	NS	NS	NS	NS	3.37617e-07	7.14945e-07	NS	NS	NS	NS	NS	NS	NS	intergenic	OR4A16,LOC100299117
15	84443705	NS	NS	NS	NS	NS	NS	NS	3.37617e-07	7.14945e-07	NS	NS	NS	NS	NS	NS	NS	intergenic	OR4A16,LOC100299117
16	6907078	NS	NS	NS	NS	NS	NS	6.03476e-07	NS	NS	NS	NS	NS	NS	NS	NS	NS	intronic	LOC101907330
16	24194937	NS	NS	NS	NS	NS	NS	3.50707e-07	NS	NS	NS	NS	NS	NS	NS	NS	NS	intergenic	C16H1orf115,MARC2
16	28448121	NS	NS	3.62349e-07	NS	NS	NS	NS	NS	NS	NS	NS	NS	NS	NS	NS	NS	intronic	LBR
16	31568420	NS	1.3977e-08	3.16268e-07	2.07405e-08	8.01789e-10	1.43394e-09	NS	NS	NS	NS	NS	NS	NS	NS	NS	NS	intronic	SMYD3
16	31568426	NS	1.3977e-08	3.16268e-07	2.07405e-08	8.01789e-10	1.43394e-09	NS	NS	NS	NS	NS	NS	NS	NS	NS	NS	intronic	SMYD3
16	31571464	NS	NS	NS	NS	7.53717e-07	NS	NS	NS	NS	NS	NS	NS	NS	NS	NS	NS	intronic	SMYD3
16	31580558	NS	NS	NS	NS	2.26737e-07	3.43983e-07	NS	NS	NS	NS	NS	NS	NS	NS	NS	NS	downstream	SMYD3
16	31580820	NS	NS	NS	NS	2.40642e-07	6.7551e-07	NS	NS	NS	NS	NS	NS	NS	NS	NS	NS	downstream	SMYD3
16	34839620	NS	NS	3.02762e-07	NS	NS	NS	NS	NS	NS	NS	NS	NS	NS	NS	NS	NS	intronic	PLD5
16	35177742	NS	NS	1.74708e-07	NS	NS	9.17813e-07	NS	NS	NS	NS	NS	NS	NS	NS	NS	NS	downstream	KMO,OPN3
16	35188758	NS	NS	NS	NS	6.49805e-07	NS	NS	NS	NS	NS	NS	NS	NS	NS	NS	NS	intronic	KMO
16	35199622	NS	NS	NS	NS	9.87418e-07	NS	NS	NS	NS	NS	NS	NS	NS	NS	NS	NS	intronic	KMO
16	35226203	NS	NS	3.86621e-07	NS	NS	NS	NS	NS	NS	NS	NS	NS	NS	NS	NS	NS	intronic	KMO
16	36006797	NS	NS	5.23041e-09	NS	NS	NS	NS	NS	NS	NS	NS	NS	NS	NS	NS	NS	intergenic	RGS7,XCL2
16	36518044	NS	NS	5.29512e-07	3.72176e-07	NS	NS	NS	NS	NS	NS	NS	NS	NS	NS	NS	NS	intergenic	TRNAC-GCA,ATP1B1
16	37301971	NS	NS	7.8023e-08	NS	NS	NS	NS	NS	NS	NS	NS	NS	NS	NS	NS	NS	intergenic	SELP,SELL
16	37870826	NS	NS	1.89236e-07	NS	NS	NS	NS	NS	NS	NS	NS	NS	NS	NS	NS	NS	intergenic	METTL11B,GORAB
16	38565065	NS	NS	8.51493e-07	NS	NS	NS	NS	NS	NS	NS	NS	NS	NS	NS	NS	NS	intronic	MROH9
16	38567367	NS	NS	7.71891e-07	NS	NS	NS	NS	NS	NS	NS	NS	NS	NS	NS	NS	NS	intronic	MROH9
16	41209445	NS	NS	1.78698e-07	NS	NS	NS	NS	NS	NS	NS	NS	NS	NS	NS	NS	NS	intronic	VPS13D
16	44181084	NS	NS	8.11118e-07	NS	NS	NS	NS	NS	NS	NS	NS	NS	NS	NS	NS	NS	intronic	SPSB1
16	44243423	NS	NS	NS	NS	2.03654e-07	NS	NS	NS	NS	NS	NS	NS	NS	NS	NS	NS	upstream	SPSB1
16	44509216	NS	NS	NS	NS	NS	NS	NS	NS	NS	7.62822e-07	NS	NS	NS	NS	NS	NS	intergenic	CA6,ENO1
16	45240143	NS	NS	7.48777e-07	NS	NS	NS	NS	NS	NS	NS	NS	NS	NS	NS	NS	NS	intergenic	LOC786597,ERRFI1
16	45240167	NS	NS	7.9719e-07	NS	NS	NS	NS	NS	NS	NS	NS	NS	NS	NS	NS	NS	intergenic	LOC786597,ERRFI1
16	45240168	NS	NS	7.9719e-07	NS	NS	NS	NS	NS	NS	NS	NS	NS	NS	NS	NS	NS	intergenic	LOC786597,ERRFI1
16	45825243	NS	NS	NS	NS	7.99674e-07	NS	NS	NS	NS	NS	NS	NS	NS	NS	NS	NS	intronic	CAMTA1
16	47563403	NS	NS	NS	7.10364e-07	8.67077e-08	NS	NS	NS	NS	3.21528e-07	NS	NS	NS	NS	NS	8.05623e-07	intergenic	NPHP4,AJAP1
16	52141387	NS	NS	NS	NS	3.70279e-07	8.29349e-07	NS	NS	NS	NS	NS	NS	NS	NS	NS	NS	intronic	FHAD1
16	56102628	NS	NS	NS	NS	4.58454e-07	NS	NS	NS	NS	NS	NS	NS	NS	NS	NS	NS	intronic	RABGAP1L
16	56752179	NS	NS	NS	NS	6.56272e-07	9.58698e-07	NS	NS	NS	NS	NS	NS	NS	NS	NS	NS	intronic	TNR
16	63530298	NS	NS	6.80069e-07	NS	NS	NS	NS	NS	NS	NS	NS	NS	NS	NS	NS	NS	intergenic	TEDDM1,RGSL1
16	63549662	NS	NS	8.63965e-07	NS	3.9851e-07	NS	NS	NS	NS	NS	NS	NS	NS	NS	NS	NS	intronic	RGSL1
16	65179393	NS	4.65637e-08	8.29909e-07	NS	1.82799e-07	6.67254e-08	NS	NS	NS	NS	NS	NS	NS	NS	NS	NS	intergenic	TSEN15,C16H1orf21
16	67535809	1.5848e-08	NS	NS	NS	NS	NS	NS	NS	NS	NS	NS	NS	NS	NS	NS	NS	intronic	PDC
16	67678233	4.3638e-07	NS	NS	NS	NS	NS	NS	NS	NS	NS	NS	NS	NS	NS	NS	NS	intergenic	PDC,PTGS2
16	67751142	3.89866e-07	NS	NS	NS	NS	NS	NS	NS	NS	NS	NS	NS	NS	NS	NS	NS	intergenic	PTGS2,PLA2G4A
16	67777521	9.63557e-07	NS	NS	NS	NS	NS	NS	NS	NS	NS	NS	NS	NS	NS	NS	NS	intergenic	PTGS2,PLA2G4A
16	68381262	NS	NS	8.32828e-07	NS	NS	NS	NS	NS	NS	NS	NS	NS	NS	NS	NS	NS	intronic	KCNK2
16	70281493	NS	NS	NS	NS	NS	NS	6.24157e-07	NS	NS	NS	NS	NS	NS	NS	NS	NS	intergenic	PROX1,RPS6KC1
16	71919685	NS	NS	NS	NS	NS	NS	NS	NS	NS	NS	NS	NS	NS	NS	3.30894e-07	NS	intergenic	SLC30A1,RD3
16	72665446	NS	2.56897e-07	1.27431e-07	2.43344e-07	1.53152e-07	7.32548e-08	NS	NS	NS	NS	NS	NS	NS	NS	NS	4.26974e-07	intronic	HHAT
16	72674634	NS	NS	NS	NS	NS	NS	NS	NS	NS	NS	NS	NS	NS	NS	2.58593e-07	NS	intronic	HHAT
16	72674658	NS	NS	NS	NS	NS	NS	NS	NS	NS	NS	NS	NS	NS	NS	2.52539e-08	NS	intronic	HHAT
16	72697905	NS	3.84409e-07	4.83113e-07	NS	NS	NS	NS	NS	NS	NS	NS	NS	NS	NS	NS	NS	intronic	HHAT
16	73867632	NS	NS	NS	NS	NS	NS	NS	NS	NS	NS	NS	NS	NS	NS	5.54187e-07	NS	intergenic	CAMK1G,MIR205
16	74362402	NS	NS	NS	NS	NS	NS	NS	NS	NS	NS	NS	NS	NS	NS	8.7496e-07	NS	intergenic	MIR205,TRNAW-CCA
16	74476981	NS	NS	NS	NS	NS	NS	NS	NS	NS	NS	NS	NS	NS	NS	6.02398e-07	NS	intergenic	TRNAW-CCA,PLXNA2
16	74774896	NS	NS	NS	NS	NS	NS	NS	NS	NS	NS	NS	NS	NS	NS	4.79731e-07	NS	intergenic	TRNAW-CCA,PLXNA2
16	74885015	NS	NS	NS	NS	NS	NS	NS	NS	NS	NS	NS	NS	NS	NS	6.778e-07	NS	intergenic	TRNAW-CCA,PLXNA2
16	76241837	NS	NS	3.47281e-07	NS	NS	NS	NS	NS	NS	NS	NS	NS	NS	NS	NS	NS	intronic	CRB1
16	77389492	NS	NS	NS	NS	NS	NS	NS	NS	NS	NS	NS	NS	NS	NS	2.77197e-08	NS	intergenic	NEK7,ATP6V1G3
16	78764444	NS	NS	NS	NS	NS	NS	NS	NS	NS	NS	NS	NS	NS	NS	4.70137e-07	NS	intergenic	LOC112441799,NR5A2
17	660479	NS	NS	NS	6.56051e-07	7.9835e-07	8.5763e-07	NS	NS	NS	NS	NS	NS	NS	NS	NS	3.37959e-07	intronic	CPE
17	1103696	NS	NS	6.01362e-07	NS	NS	NS	NS	NS	NS	NS	NS	NS	NS	NS	NS	NS	intergenic	CPE,MIR2285J-1
17	1205787	NS	NS	3.82599e-08	NS	NS	NS	NS	NS	NS	NS	NS	NS	NS	NS	NS	NS	intergenic	CPE,MIR2285J-1
17	3150868	NS	NS	2.27356e-07	NS	NS	NS	NS	NS	NS	NS	NS	NS	NS	NS	NS	NS	intronic	DCHS2
17	7910576	NS	NS	1.03683e-07	NS	NS	NS	NS	NS	NS	NS	NS	NS	NS	NS	NS	3.18866e-07	intergenic	TRNAE-UUC,IQCM
17	7924075	NS	NS	NS	NS	NS	NS	NS	1.31975e-08	5.12964e-07	NS	NS	NS	NS	NS	NS	5.13504e-07	intergenic	TRNAE-UUC,IQCM
17	8546447	NS	5.1487e-07	NS	NS	NS	NS	NS	NS	NS	NS	NS	NS	NS	NS	NS	NS	intergenic	IQCM,TRNAC-GCA
17	9183113	NS	NS	4.10072e-07	NS	NS	NS	NS	NS	NS	NS	NS	NS	NS	NS	NS	NS	intergenic	TRNAC-GCA,NR3C2
17	9341927	NS	NS	NS	NS	NS	NS	NS	NS	NS	NS	NS	NS	7.96842e-07	NS	NS	NS	intergenic	TRNAC-GCA,NR3C2
17	40969071	NS	NS	7.28796e-07	NS	NS	NS	NS	NS	NS	NS	NS	NS	NS	NS	NS	NS	intergenic	FAM198B,TRNAG-CCC
17	42111546	NS	3.40146e-07	NS	NS	3.51382e-07	2.97035e-07	NS	NS	NS	NS	NS	NS	NS	NS	NS	NS	intergenic	GLRB,PDGFC
17	42125852	NS	1.03836e-07	6.22136e-07	NS	NS	7.64248e-07	NS	NS	NS	NS	NS	NS	NS	NS	NS	NS	intergenic	GLRB,PDGFC
17	50737666	NS	NS	NS	NS	6.61477e-07	NS	NS	NS	NS	NS	NS	NS	NS	NS	NS	NS	intronic	AACS
18	3121206	NS	NS	NS	NS	2.8485e-07	NS	NS	NS	NS	NS	4.11828e-09	5.58481e-07	NS	NS	NS	9.8569e-09	intergenic	TERF2IP,CNTNAP4
18	3121208	NS	NS	NS	NS	2.8485e-07	NS	NS	NS	NS	NS	4.11828e-09	5.58481e-07	NS	NS	NS	9.8569e-09	intergenic	TERF2IP,CNTNAP4
18	6503873	NS	9.61843e-07	NS	NS	NS	NS	NS	NS	NS	NS	NS	NS	NS	NS	NS	NS	intronic	MAF
18	11485588	NS	NS	1.22667e-07	NS	NS	NS	NS	NS	NS	NS	NS	NS	NS	NS	NS	NS	intronic	GSE1
18	16013622	NS	NS	NS	9.23598e-07	NS	NS	NS	NS	NS	NS	NS	NS	NS	NS	NS	NS	intronic	PHKB
18	16020147	NS	7.66416e-07	NS	3.05339e-08	NS	3.80795e-07	NS	NS	NS	NS	NS	NS	NS	NS	NS	6.19303e-07	intronic	PHKB
18	16020256	NS	NS	NS	4.05793e-08	NS	5.76952e-07	NS	NS	NS	NS	NS	NS	NS	NS	NS	NS	intronic	PHKB
18	18337850	NS	NS	NS	1.2276e-07	4.25093e-07	3.40404e-07	NS	NS	NS	NS	NS	NS	NS	NS	NS	NS	intergenic	ZNF423,LOC786252
18	18338059	NS	NS	NS	5.39012e-07	NS	NS	NS	NS	NS	NS	NS	NS	NS	NS	NS	NS	intergenic	ZNF423,LOC786252
18	18398197	NS	NS	NS	4.30093e-07	NS	NS	NS	NS	NS	NS	NS	NS	NS	NS	NS	NS	intergenic	LOC786252,CNEP1R1
18	18557383	NS	NS	NS	3.13127e-07	NS	NS	NS	NS	NS	NS	NS	NS	NS	NS	NS	NS	intergenic	HEATR3,PAPD5
18	23180079	NS	7.6581e-07	NS	NS	NS	NS	NS	NS	NS	NS	NS	NS	NS	NS	NS	NS	intergenic	TRNAW-CCA,IRX5
18	23181278	NS	1.94997e-08	NS	6.04994e-08	2.20529e-08	1.2323e-08	NS	NS	NS	NS	NS	NS	NS	NS	NS	NS	intergenic	TRNAW-CCA,IRX5
18	23181313	NS	2.86069e-09	NS	1.03364e-07	3.36199e-08	9.05145e-09	NS	NS	NS	NS	NS	NS	NS	NS	NS	NS	intergenic	TRNAW-CCA,IRX5
18	23181404	NS	2.27723e-09	8.66592e-08	1.85874e-11	2.38185e-11	3.79347e-11	NS	NS	NS	NS	NS	NS	NS	NS	NS	4.40294e-08	intergenic	TRNAW-CCA,IRX5
18	23511583	NS	NS	NS	5.78484e-07	NS	NS	NS	NS	NS	NS	NS	NS	NS	NS	NS	8.36743e-07	intergenic	TRNAW-CCA,TRNAA-AGC
18	33943407	NS	NS	NS	NS	9.4753e-07	NS	NS	NS	NS	NS	NS	NS	NS	NS	NS	NS	intergenic	CDH11,CDH5
18	33943445	NS	NS	NS	NS	1.75477e-07	3.81573e-07	NS	NS	NS	NS	NS	NS	NS	NS	NS	NS	intergenic	CDH11,CDH5
18	37851553	NS	4.69327e-07	NS	NS	NS	5.11238e-07	NS	NS	NS	NS	NS	NS	NS	NS	NS	NS	intergenic	PSMD7,ZFHX3
18	46216051	NS	NS	NS	NS	9.70204e-07	NS	NS	NS	NS	NS	NS	NS	NS	NS	NS	NS	intronic	ATP4A
18	46248183	NS	NS	NS	4.60124e-07	1.63457e-07	1.31053e-07	NS	NS	NS	NS	NS	NS	NS	NS	NS	NS	intergenic	LOC786928,HAUS5
18	46430382	NS	NS	NS	NS	7.00365e-07	8.48862e-07	NS	NS	NS	NS	NS	NS	NS	NS	NS	NS	exonic	ZBTB32
18	46585024	NS	NS	2.06301e-07	NS	NS	NS	NS	NS	NS	NS	NS	NS	NS	NS	NS	NS	intronic	NFKBID
18	46586446	NS	NS	3.81169e-09	4.57612e-07	6.05196e-07	2.41433e-07	NS	NS	NS	NS	NS	NS	NS	NS	NS	NS	intronic	NFKBID
18	46913338	NS	NS	NS	NS	5.64487e-07	NS	NS	NS	NS	NS	NS	NS	NS	NS	NS	NS	intronic	ZNF567
18	46960907	NS	NS	NS	6.61638e-07	NS	3.55866e-07	NS	NS	NS	NS	NS	NS	NS	NS	NS	NS	intronic	ZNF382
18	47328560	NS	NS	8.33268e-07	NS	NS	NS	NS	NS	NS	NS	NS	NS	NS	NS	NS	NS	intergenic	ZNF383,ZNF383
18	47400250	NS	NS	NS	7.69794e-07	9.71839e-07	NS	NS	NS	NS	NS	NS	NS	NS	NS	NS	NS	intergenic	ZNF527,ZNF569
18	48394176	NS	NS	NS	NS	8.2966e-07	NS	NS	NS	NS	NS	NS	NS	NS	NS	NS	NS	intronic	EIF3K
18	48406146	NS	NS	2.9597e-07	NS	4.02566e-07	4.93127e-07	NS	NS	NS	NS	NS	NS	NS	NS	NS	NS	intronic	ACTN4
18	48815547	NS	2.36152e-07	NS	NS	NS	NS	NS	NS	NS	NS	NS	NS	NS	NS	NS	NS	intergenic	LOC529686,ACP7
18	48815548	NS	5.47801e-07	NS	NS	NS	NS	NS	NS	NS	NS	NS	NS	NS	NS	NS	NS	intergenic	LOC529686,ACP7
18	48829212	NS	8.44182e-07	NS	NS	NS	NS	NS	NS	NS	NS	NS	NS	NS	NS	NS	NS	intronic	ACP7
18	49825552	NS	5.60644e-07	NS	NS	NS	9.01438e-07	NS	NS	NS	NS	NS	NS	NS	NS	NS	NS	intronic	SPTBN4
18	51919583	NS	NS	2.46288e-07	NS	NS	NS	NS	NS	NS	NS	NS	NS	NS	NS	NS	NS	intergenic	LOC526915,IRGC
18	52004162	NS	NS	5.51359e-08	NS	NS	NS	NS	NS	NS	NS	NS	NS	NS	NS	NS	NS	intergenic	LYPD5,ZNF283
18	52493964	NS	8.26789e-07	6.3128e-08	1.20685e-07	3.64753e-08	4.5596e-08	NS	NS	NS	NS	3.77114e-07	NS	NS	NS	NS	1.43398e-08	intergenic	CEACAM16,BCL3
18	52493989	NS	NS	3.32578e-07	NS	NS	NS	NS	NS	NS	NS	NS	NS	NS	NS	NS	NS	intergenic	CEACAM16,BCL3
18	56398503	NS	NS	NS	NS	NS	NS	NS	NS	NS	NS	NS	5.47393e-07	NS	NS	NS	NS	intergenic	IZUMO2,MYH14
18	56715502	NS	NS	NS	NS	NS	NS	NS	NS	NS	NS	NS	4.56908e-07	NS	NS	NS	NS	intronic	SYT3
18	57435638	NS	NS	NS	NS	NS	NS	NS	NS	NS	NS	NS	6.35993e-07	NS	NS	NS	NS	intronic	ETFB
18	58096897	NS	NS	6.52076e-07	1.68744e-07	NS	NS	NS	NS	NS	NS	NS	NS	NS	NS	NS	NS	intronic	PPP2R1A
18	58142555	NS	NS	NS	NS	NS	NS	NS	NS	NS	NS	NS	4.56916e-07	NS	NS	NS	NS	intronic	BOSTAUV1R417
18	62544318	NS	NS	4.17247e-07	NS	NS	NS	NS	NS	NS	NS	NS	NS	NS	NS	NS	NS	intronic	KIR2DL5A
18	62556395	NS	NS	3.82525e-07	NS	NS	NS	NS	NS	NS	NS	NS	NS	NS	NS	NS	NS	intronic	KIR3DL1
18	62556404	NS	NS	8.34956e-07	NS	NS	NS	NS	NS	NS	NS	NS	NS	NS	NS	NS	NS	intronic	KIR3DL1
18	63481675	NS	NS	NS	NS	NS	NS	NS	NS	NS	NS	NS	2.05068e-07	NS	NS	NS	NS	intronic	NLRP5
19	1874679	NS	NS	NS	NS	NS	NS	NS	NS	NS	NS	NS	NS	8.94814e-07	NS	NS	NS	intergenic	CA10,KIF2B
19	1898593	NS	NS	NS	NS	NS	NS	NS	NS	NS	NS	NS	NS	4.95566e-07	NS	NS	NS	intergenic	CA10,KIF2B
19	2015627	NS	NS	NS	NS	NS	NS	NS	NS	NS	NS	NS	NS	1.35286e-07	NS	NS	NS	intergenic	CA10,KIF2B
19	2325994	NS	NS	NS	NS	NS	NS	NS	NS	NS	NS	NS	NS	2.89006e-07	3.06116e-08	NS	NS	intergenic	CA10,KIF2B
19	2326002	NS	NS	NS	NS	NS	NS	NS	NS	NS	NS	NS	NS	9.47668e-08	8.01504e-08	NS	NS	intergenic	CA10,KIF2B
19	4856164	NS	NS	7.16068e-07	NS	NS	NS	NS	NS	NS	NS	NS	NS	NS	NS	NS	NS	intergenic	LOC100847997,LOC781197
19	23748031	NS	NS	4.84543e-07	NS	NS	NS	NS	NS	NS	NS	NS	NS	NS	NS	NS	NS	intronic	RAP1GAP2
19	25105680	NS	NS	NS	NS	NS	NS	NS	NS	NS	NS	NS	5.72452e-07	NS	NS	NS	NS	intronic	SMTNL2
19	35384865	8.32625e-07	NS	NS	NS	NS	NS	NS	NS	NS	NS	NS	NS	NS	NS	NS	NS	intergenic	KCNJ12,UTP18
19	41386632	NS	NS	NS	NS	5.6161e-07	7.24311e-07	NS	NS	NS	NS	NS	NS	NS	NS	NS	NS	intergenic	LOC788228,LOC788196
19	51996542	NS	NS	NS	NS	NS	9.3387e-07	NS	NS	NS	NS	NS	NS	NS	NS	NS	NS	intronic	RPTOR
19	57417065	NS	NS	NS	NS	NS	NS	NS	NS	NS	NS	NS	3.76467e-08	NS	NS	NS	NS	intergenic	RPL38,LOC112442754
19	58016538	NS	NS	NS	NS	NS	NS	NS	NS	NS	NS	NS	2.1716e-07	NS	NS	NS	8.98377e-07	UTR3	SDK2
19	59183658	NS	NS	NS	NS	NS	NS	NS	NS	NS	NS	NS	8.29087e-07	NS	NS	NS	NS	intergenic	TRNAG-UCC,KCNJ2
19	59184822	NS	NS	NS	NS	NS	NS	NS	NS	NS	NS	NS	2.78301e-08	NS	NS	NS	NS	intergenic	TRNAG-UCC,KCNJ2
19	59325751	NS	NS	NS	NS	NS	NS	NS	NS	NS	NS	5.5326e-08	2.25424e-08	NS	NS	NS	2.0885e-07	intergenic	TRNAG-UCC,KCNJ2
19	59332925	NS	NS	NS	NS	NS	NS	NS	NS	NS	NS	1.40728e-07	7.52374e-07	NS	NS	NS	NS	intergenic	TRNAG-UCC,KCNJ2
19	60168756	NS	2.8013e-08	NS	2.65095e-10	1.40076e-09	9.55091e-10	NS	NS	NS	NS	8.07219e-07	NS	NS	NS	NS	1.6778e-08	intergenic	TRNAG-UCC,KCNJ2
19	60168819	NS	8.66607e-07	NS	2.35564e-08	7.30521e-08	6.05154e-08	NS	NS	NS	NS	NS	NS	NS	NS	NS	2.95417e-07	intergenic	TRNAG-UCC,KCNJ2
19	60168821	NS	NS	NS	2.7098e-07	6.94731e-07	5.78005e-07	NS	NS	NS	NS	NS	NS	NS	NS	NS	NS	intergenic	TRNAG-UCC,KCNJ2
19	60168866	NS	NS	NS	4.1927e-07	7.79506e-07	6.53515e-07	NS	NS	NS	NS	NS	NS	NS	NS	NS	NS	intergenic	TRNAG-UCC,KCNJ2
19	60168871	NS	NS	NS	2.39276e-07	4.63901e-07	3.95162e-07	NS	NS	NS	NS	NS	NS	NS	NS	NS	NS	intergenic	TRNAG-UCC,KCNJ2
19	60170742	NS	NS	NS	1.4159e-07	5.67498e-07	3.79231e-07	NS	NS	NS	NS	NS	NS	NS	NS	NS	NS	intergenic	TRNAG-UCC,KCNJ2
19	60170766	NS	NS	NS	2.22183e-08	1.03954e-07	7.6149e-08	NS	NS	NS	NS	NS	NS	NS	NS	NS	NS	intergenic	TRNAG-UCC,KCNJ2
19	60725574	NS	NS	NS	NS	NS	NS	NS	NS	NS	NS	6.05853e-07	NS	NS	NS	NS	9.85355e-07	intronic	KCNJ16
19	60733369	NS	NS	NS	NS	NS	NS	NS	NS	NS	NS	4.29835e-07	NS	NS	NS	NS	NS	intronic	KCNJ16
19	60755360	NS	NS	NS	7.43452e-07	7.31258e-07	NS	NS	NS	NS	NS	NS	NS	NS	NS	NS	NS	intergenic	KCNJ16,MAP2K6
19	62954230	NS	NS	NS	4.38838e-07	NS	NS	NS	NS	NS	NS	NS	NS	NS	NS	NS	NS	intronic	PRKCA
20	774699	NS	NS	NS	1.24541e-08	2.88589e-09	1.63436e-08	NS	NS	NS	NS	NS	NS	NS	NS	NS	4.88727e-07	intronic	SLIT3
20	774710	NS	9.56055e-07	NS	4.23111e-09	3.8074e-10	5.4006e-09	NS	NS	NS	NS	2.0043e-07	NS	NS	NS	NS	1.11373e-07	intronic	SLIT3
20	1021956	NS	5.05247e-07	NS	NS	NS	NS	NS	NS	NS	NS	NS	NS	NS	NS	NS	NS	intronic	SLIT3
20	1049957	NS	NS	NS	NS	6.69112e-07	NS	NS	NS	NS	NS	NS	NS	NS	NS	NS	NS	intronic	SLIT3
20	1488440	NS	NS	NS	NS	4.98796e-07	6.3304e-07	NS	NS	NS	NS	NS	NS	NS	NS	NS	NS	intronic	SPDL1
20	1610268	NS	NS	NS	NS	NS	NS	NS	NS	NS	NS	NS	7.61745e-07	NS	NS	NS	NS	intronic	DOCK2
20	1610388	NS	NS	NS	NS	NS	NS	NS	NS	NS	NS	NS	9.92544e-07	NS	NS	NS	NS	intronic	DOCK2
20	1895365	NS	3.33911e-07	NS	9.77111e-07	NS	7.82195e-07	NS	NS	NS	NS	NS	NS	NS	NS	NS	NS	intronic	DOCK2
20	2257104	NS	1.41179e-07	NS	2.3791e-07	NS	4.19301e-07	NS	NS	NS	NS	NS	NS	NS	NS	NS	NS	UTR3	KCNMB1
20	2257126	NS	2.3206e-07	NS	5.85943e-07	NS	7.94645e-07	NS	NS	NS	NS	NS	NS	NS	NS	NS	NS	UTR3	KCNMB1
20	2616970	NS	3.82794e-07	NS	NS	NS	NS	NS	NS	NS	NS	NS	NS	NS	NS	NS	NS	intronic	KCNIP1
20	2636411	NS	4.32975e-07	NS	NS	NS	NS	NS	NS	NS	NS	NS	NS	NS	NS	NS	NS	intronic	KCNIP1
20	2663176	NS	9.18939e-07	NS	NS	NS	NS	NS	NS	NS	NS	NS	NS	NS	NS	NS	NS	intergenic	KCNIP1,GABRP
20	2667381	NS	7.86606e-07	NS	NS	NS	NS	NS	NS	NS	NS	NS	NS	NS	NS	NS	NS	intergenic	KCNIP1,GABRP
20	4176714	NS	4.78119e-07	NS	NS	NS	NS	NS	NS	NS	NS	NS	NS	NS	NS	NS	NS	intronic	SH3PXD2B
20	4176715	NS	4.78119e-07	NS	NS	NS	NS	NS	NS	NS	NS	NS	NS	NS	NS	NS	NS	intronic	SH3PXD2B
20	4176753	NS	4.46585e-07	NS	NS	NS	NS	NS	NS	NS	NS	NS	NS	NS	NS	NS	NS	intronic	SH3PXD2B
20	11173861	NS	NS	NS	NS	9.35965e-07	NS	NS	NS	NS	NS	NS	NS	NS	NS	NS	NS	intergenic	SLC30A5,PIK3R1
20	15120092	NS	NS	NS	NS	NS	NS	NS	NS	NS	NS	2.02682e-07	NS	NS	NS	NS	NS	intronic	RNF180
20	29985104	NS	NS	NS	NS	NS	NS	NS	NS	2.52105e-07	NS	NS	NS	NS	NS	NS	NS	intergenic	HCN1,MRPS30
20	32132803	NS	NS	2.5714e-07	NS	NS	NS	NS	NS	NS	NS	NS	NS	NS	NS	NS	NS	intergenic	GHR,FBXO4
20	34240008	NS	NS	NS	1.56935e-07	NS	NS	NS	NS	NS	NS	NS	NS	NS	NS	NS	NS	intergenic	TRNAE-CUC,DAB2
20	36971587	NS	NS	NS	7.4414e-07	NS	7.98868e-07	NS	NS	NS	NS	NS	NS	NS	NS	NS	NS	intergenic	WDR70,NUP155
20	37087918	NS	NS	NS	3.46738e-07	7.08173e-07	5.6556e-07	NS	NS	NS	NS	NS	NS	NS	NS	NS	NS	intronic	CPLANE1
20	50637599	NS	NS	NS	7.34062e-07	8.88004e-07	8.28043e-07	NS	NS	NS	NS	NS	NS	NS	NS	NS	NS	intergenic	TRNAC-GCA,CDH12
20	59588648	NS	6.12179e-07	NS	NS	NS	8.74094e-07	NS	NS	NS	NS	NS	NS	NS	NS	NS	NS	intergenic	DNAH5,CTNND2
20	59614358	NS	7.85042e-07	NS	NS	8.75017e-07	6.71503e-07	NS	NS	NS	NS	NS	NS	NS	NS	NS	NS	intergenic	DNAH5,CTNND2
20	62978036	NS	NS	NS	NS	NS	NS	NS	NS	NS	NS	NS	3.15285e-07	NS	NS	NS	NS	intergenic	CMBL,CCT5
20	68850728	NS	NS	NS	NS	2.19296e-07	3.84257e-07	NS	NS	NS	NS	NS	NS	NS	NS	NS	NS	intergenic	LOC101902976,IRX1
20	68918490	NS	NS	NS	NS	4.28273e-07	9.18709e-07	NS	NS	NS	NS	NS	NS	NS	NS	NS	NS	intergenic	LOC101902976,IRX1
20	68970460	NS	NS	NS	NS	NS	NS	NS	NS	NS	NS	NS	1.4572e-07	NS	NS	NS	NS	intergenic	LOC101902976,IRX1
21	3375866	NS	NS	5.86578e-07	NS	NS	NS	NS	NS	NS	NS	NS	NS	NS	NS	NS	NS	intergenic	TRNAE-UUC,GABRB3
21	3377144	NS	NS	1.00706e-07	NS	NS	NS	NS	NS	NS	NS	NS	NS	NS	NS	NS	NS	intergenic	TRNAE-UUC,GABRB3
21	3773038	NS	NS	NS	NS	NS	NS	NS	NS	5.71023e-07	NS	NS	NS	NS	NS	NS	NS	intergenic	TRNAE-UUC,GABRB3
21	9095596	NS	NS	7.71164e-07	NS	NS	NS	NS	NS	NS	NS	NS	NS	NS	NS	NS	NS	intergenic	ARRDC4,NR2F2
21	9135064	NS	NS	9.94374e-07	NS	NS	NS	NS	NS	NS	NS	NS	NS	NS	NS	NS	NS	intergenic	ARRDC4,NR2F2
21	15876713	NS	NS	NS	4.26217e-07	7.28175e-07	3.27356e-07	NS	NS	NS	NS	NS	NS	NS	NS	NS	1.48669e-07	intronic	SV2B
21	18076469	NS	NS	NS	NS	NS	NS	NS	NS	NS	NS	NS	NS	NS	NS	5.23659e-07	NS	intergenic	AGBL1,NTRK3
21	18076475	NS	NS	NS	NS	NS	NS	NS	NS	NS	NS	NS	NS	NS	NS	5.43616e-07	NS	intergenic	AGBL1,NTRK3
21	18279432	NS	NS	NS	NS	NS	NS	NS	NS	NS	NS	NS	NS	NS	NS	3.72473e-07	NS	intergenic	AGBL1,NTRK3
21	22180531	NS	NS	NS	NS	NS	NS	NS	NS	NS	NS	NS	NS	NS	NS	7.54194e-07	NS	intronic	IQGAP1
21	22192275	NS	NS	NS	NS	NS	NS	NS	NS	NS	NS	NS	NS	NS	NS	6.41905e-07	NS	intronic	IQGAP1
21	22196208	NS	NS	NS	NS	NS	NS	NS	NS	NS	NS	NS	NS	NS	NS	8.58083e-07	NS	intronic	IQGAP1
21	22197840	NS	NS	NS	NS	NS	NS	NS	NS	NS	NS	NS	NS	NS	NS	1.60383e-07	NS	intronic	IQGAP1
21	22210414	NS	NS	NS	NS	NS	NS	NS	NS	NS	NS	NS	NS	NS	NS	6.18788e-07	NS	intronic	IQGAP1
21	30058628	NS	NS	NS	NS	NS	NS	NS	NS	NS	NS	NS	NS	NS	NS	3.72683e-07	NS	intronic	OTUD7A
21	31953650	NS	NS	NS	NS	NS	NS	NS	NS	NS	NS	NS	NS	NS	NS	6.01734e-07	NS	intronic	SCAPER
21	34612840	NS	NS	NS	NS	NS	NS	NS	NS	NS	NS	NS	NS	NS	NS	7.99397e-07	NS	intronic	PML
21	34615454	NS	NS	NS	NS	NS	NS	NS	NS	NS	NS	NS	NS	NS	NS	8.2589e-08	NS	intronic	PML
21	35356397	NS	NS	NS	NS	NS	NS	NS	NS	NS	NS	NS	NS	3.55088e-07	NS	NS	NS	intergenic	STXBP6,MIR2888-1
21	36073717	NS	NS	NS	NS	NS	NS	NS	NS	NS	NS	NS	NS	1.88706e-07	NS	NS	NS	intergenic	MIR2888-1,NOVA1
21	36141638	NS	NS	NS	NS	NS	NS	NS	NS	NS	NS	NS	NS	NS	NS	7.86926e-07	NS	intergenic	MIR2888-1,NOVA1
21	36180406	NS	NS	NS	NS	NS	NS	NS	NS	NS	NS	NS	NS	NS	NS	5.87656e-07	NS	intergenic	MIR2888-1,NOVA1
21	36506202	NS	NS	NS	NS	NS	NS	NS	NS	NS	NS	NS	NS	7.47299e-07	NS	NS	NS	intergenic	MIR2888-1,NOVA1
21	38227164	NS	NS	NS	NS	NS	NS	NS	NS	NS	NS	NS	NS	NS	NS	7.11563e-07	NS	intergenic	LOC785745,FOXG1
21	38924056	NS	NS	NS	NS	NS	NS	NS	NS	NS	NS	NS	NS	9.90343e-07	NS	NS	NS	intergenic	LOC785745,FOXG1
21	40696543	NS	NS	NS	NS	NS	NS	NS	NS	NS	NS	NS	NS	NS	NS	3.775e-07	NS	intergenic	PRKD1,G2E3
21	40998872	NS	NS	NS	NS	NS	NS	NS	NS	NS	NS	NS	NS	NS	NS	8.17751e-07	NS	intergenic	PRKD1,G2E3
21	41824687	NS	NS	NS	NS	NS	NS	NS	NS	NS	NS	NS	8.47824e-07	NS	NS	NS	NS	intergenic	HECTD1,HEATR5A
21	42112199	NS	NS	NS	NS	5.15698e-07	4.35775e-07	NS	NS	NS	NS	NS	NS	NS	NS	NS	NS	intronic	NUBPL
21	42719164	NS	NS	2.73435e-07	NS	NS	NS	NS	NS	NS	NS	NS	NS	NS	NS	NS	NS	intronic	AKAP6
21	43346130	NS	NS	NS	NS	6.08544e-07	9.05882e-07	NS	NS	NS	NS	NS	NS	NS	NS	NS	NS	intronic	NPAS3
22	3437939	8.22746e-07	NS	NS	NS	NS	NS	NS	NS	NS	NS	NS	NS	NS	NS	NS	NS	intergenic	ZCWPW2,RBMS3
22	35832273	NS	NS	NS	NS	NS	NS	NS	NS	NS	NS	NS	7.37051e-07	NS	NS	NS	NS	intronic	MAGI1
22	35840933	NS	NS	3.94902e-07	NS	NS	NS	NS	NS	NS	NS	NS	NS	NS	NS	NS	NS	intronic	MAGI1
22	37865556	NS	NS	2.80286e-07	NS	NS	NS	NS	NS	NS	NS	NS	NS	NS	NS	NS	NS	intronic	SYNPR
22	37865580	NS	NS	9.24262e-08	NS	NS	NS	NS	NS	NS	NS	NS	NS	NS	NS	NS	NS	intronic	SYNPR
22	37966069	NS	NS	4.92736e-07	NS	NS	NS	NS	NS	NS	NS	NS	NS	NS	NS	NS	NS	intronic	SYNPR
22	38523667	NS	NS	2.9575e-07	NS	NS	NS	NS	NS	NS	NS	NS	NS	NS	NS	NS	NS	intronic	CADPS
22	38523674	NS	NS	2.9575e-07	NS	NS	NS	NS	NS	NS	NS	NS	NS	NS	NS	NS	NS	intronic	CADPS
22	38539651	NS	NS	1.47407e-07	NS	NS	NS	NS	NS	NS	NS	NS	NS	NS	NS	NS	NS	intronic	CADPS
22	40989569	NS	NS	1.02174e-08	NS	NS	NS	NS	NS	NS	NS	NS	NS	NS	NS	NS	NS	intronic	FHIT
22	41273319	NS	NS	9.89171e-07	NS	NS	NS	NS	NS	NS	NS	NS	NS	NS	NS	NS	NS	intronic	FHIT
22	44178591	NS	3.96075e-07	NS	NS	NS	NS	NS	NS	NS	NS	NS	NS	NS	NS	NS	NS	intronic	ARHGEF3
22	52746902	NS	NS	NS	NS	NS	NS	NS	NS	NS	3.72642e-07	NS	NS	NS	NS	NS	NS	intergenic	PRSS45,PRSS46P
23	1229821	NS	NS	9.17806e-08	NS	NS	NS	NS	NS	NS	NS	NS	NS	NS	NS	NS	NS	intergenic	KHDRBS2,PRIM2
23	1271768	NS	5.49731e-08	5.08059e-08	2.20431e-07	NS	1.08915e-07	NS	NS	NS	NS	NS	NS	NS	NS	NS	NS	intergenic	KHDRBS2,PRIM2
23	1320892	NS	1.83791e-07	NS	7.31663e-08	3.41393e-08	2.29974e-08	NS	NS	NS	NS	NS	NS	NS	NS	NS	NS	intergenic	KHDRBS2,PRIM2
23	1428070	NS	NS	NS	NS	NS	5.42142e-07	NS	NS	NS	NS	NS	NS	NS	NS	NS	NS	intergenic	KHDRBS2,PRIM2
23	1428088	NS	NS	NS	NS	NS	7.1894e-07	NS	NS	NS	NS	NS	NS	NS	NS	NS	NS	intergenic	KHDRBS2,PRIM2
23	1431030	NS	7.41084e-07	NS	NS	2.47458e-07	2.51764e-07	NS	NS	NS	NS	NS	NS	NS	NS	NS	NS	intergenic	KHDRBS2,PRIM2
23	1434050	NS	6.62967e-08	1.00707e-07	1.86944e-08	1.00693e-07	2.57053e-08	NS	NS	NS	NS	NS	NS	NS	NS	NS	4.56837e-07	intergenic	KHDRBS2,PRIM2
23	1434602	NS	NS	NS	NS	7.51884e-07	6.03016e-07	NS	NS	NS	NS	NS	NS	NS	NS	NS	NS	intergenic	KHDRBS2,PRIM2
23	1502418	NS	NS	1.90591e-07	NS	NS	NS	NS	NS	NS	NS	NS	NS	NS	NS	NS	NS	intergenic	KHDRBS2,PRIM2
23	1571435	NS	NS	3.76294e-09	9.4076e-07	NS	NS	NS	NS	NS	NS	NS	NS	NS	NS	NS	NS	intergenic	KHDRBS2,PRIM2
23	9954233	NS	NS	NS	NS	NS	NS	NS	NS	4.47384e-07	NS	NS	NS	NS	NS	NS	NS	intronic	SLC26A8
23	16747852	NS	4.11708e-07	6.8441e-07	NS	NS	NS	NS	NS	NS	NS	NS	NS	NS	NS	NS	NS	intronic	PTK7
23	20255120	1.89535e-07	NS	NS	NS	NS	NS	NS	NS	NS	NS	NS	NS	NS	NS	NS	NS	intronic	ADGRF1
23	36417459	NS	NS	NS	NS	NS	NS	NS	NS	NS	NS	NS	NS	NS	NS	1.36774e-07	NS	intergenic	MIR2284C,SOX4
23	39114287	NS	NS	NS	NS	NS	NS	NS	NS	NS	NS	NS	NS	NS	NS	4.51394e-07	NS	intergenic	TRNAI-AAU,RNF144B
23	39133912	NS	NS	8.31076e-08	NS	NS	NS	NS	NS	NS	NS	NS	NS	NS	NS	NS	NS	intergenic	TRNAI-AAU,RNF144B
23	39133922	NS	NS	8.31076e-08	NS	NS	NS	NS	NS	NS	NS	NS	NS	NS	NS	NS	NS	intergenic	TRNAI-AAU,RNF144B
23	39136669	NS	NS	NS	NS	NS	NS	NS	NS	NS	NS	NS	NS	NS	NS	2.79579e-08	NS	intergenic	TRNAI-AAU,RNF144B
23	39137188	NS	NS	NS	NS	9.28571e-07	7.14632e-07	NS	NS	NS	NS	NS	NS	NS	NS	NS	NS	intergenic	TRNAI-AAU,RNF144B
23	39195127	NS	NS	NS	NS	6.65706e-07	9.16955e-07	NS	NS	NS	NS	NS	NS	NS	NS	NS	NS	intronic	RNF144B
23	39455537	NS	NS	3.62527e-07	NS	2.69802e-07	4.26705e-07	NS	NS	NS	NS	NS	NS	NS	NS	NS	NS	downstream	TPMT
23	45512625	NS	1.22288e-07	NS	NS	NS	3.8817e-07	NS	NS	NS	NS	NS	NS	NS	NS	NS	NS	intronic	LOC100848875,LOC520336
23	45517018	NS	4.90064e-07	NS	NS	NS	NS	NS	NS	NS	NS	NS	NS	NS	NS	NS	NS	intronic	LOC100848875,LOC520336
23	45517077	NS	NS	5.95564e-07	NS	NS	8.95381e-07	NS	NS	NS	NS	NS	NS	NS	NS	NS	NS	intronic	LOC100848875,LOC520336
23	45750673	NS	NS	7.08957e-08	NS	NS	NS	NS	NS	NS	NS	NS	NS	NS	NS	NS	NS	intergenic	TFAP2A,OFCC1
23	45750674	NS	NS	7.08957e-08	NS	NS	NS	NS	NS	NS	NS	NS	NS	NS	NS	NS	NS	intergenic	TFAP2A,OFCC1
23	46382552	NS	6.02462e-07	NS	NS	NS	NS	NS	NS	NS	NS	NS	NS	NS	NS	NS	NS	intergenic	OFCC1,SLC35B3
23	46433646	NS	NS	1.92405e-08	NS	NS	NS	NS	NS	NS	NS	NS	NS	NS	NS	NS	NS	intergenic	OFCC1,SLC35B3
23	46524483	NS	NS	5.56087e-07	NS	NS	NS	NS	NS	NS	NS	NS	NS	NS	NS	NS	NS	intergenic	OFCC1,SLC35B3
23	47249930	NS	NS	NS	NS	1.56512e-07	3.07482e-07	NS	NS	NS	NS	NS	NS	NS	NS	NS	NS	intergenic	TRNAQ-CUG,EEF1E1
23	47254437	NS	6.29982e-07	NS	4.39826e-07	3.09611e-07	2.34924e-07	NS	NS	NS	NS	NS	NS	NS	NS	NS	NS	intergenic	TRNAQ-CUG,EEF1E1
23	47256636	NS	NS	2.84647e-07	4.48696e-07	5.92728e-08	1.26386e-07	NS	NS	NS	NS	NS	NS	NS	NS	NS	NS	intergenic	TRNAQ-CUG,EEF1E1
23	47256804	NS	NS	NS	NS	2.88447e-07	7.66547e-07	NS	NS	NS	NS	NS	NS	NS	NS	NS	NS	intergenic	TRNAQ-CUG,EEF1E1
23	47256898	NS	4.31302e-07	NS	9.09846e-09	2.21035e-08	2.4394e-08	NS	NS	NS	NS	NS	NS	NS	NS	NS	4.03023e-07	intergenic	TRNAQ-CUG,EEF1E1
23	47257665	NS	6.24329e-07	4.127e-07	NS	2.2849e-07	1.82005e-07	NS	NS	NS	NS	NS	NS	NS	NS	NS	NS	intergenic	TRNAQ-CUG,EEF1E1
23	47259860	NS	NS	NS	1.87029e-07	1.26484e-07	4.56681e-07	NS	NS	NS	NS	NS	NS	NS	NS	NS	NS	intergenic	TRNAQ-CUG,EEF1E1
23	47315482	NS	3.37677e-07	NS	7.22808e-07	1.70338e-07	1.27446e-07	NS	NS	NS	NS	NS	NS	NS	NS	NS	NS	intergenic	TRNAQ-CUG,EEF1E1
23	48937533	NS	NS	2.33923e-07	NS	NS	NS	NS	NS	NS	NS	NS	NS	NS	NS	NS	NS	intergenic	F13A1,NRN1
23	49151800	7.59772e-07	NS	NS	NS	NS	NS	NS	NS	NS	NS	NS	NS	NS	NS	NS	NS	intronic	FARS2
23	50608857	NS	2.79129e-07	NS	NS	NS	NS	NS	NS	NS	NS	NS	NS	NS	NS	NS	NS	intergenic	RIPK1,NQO2
23	51862925	2.31246e-07	NS	NS	NS	NS	NS	NS	NS	NS	NS	NS	NS	NS	NS	NS	NS	intergenic	LOC104969983,EXOC2
24	1274870	1.25079e-07	NS	NS	NS	NS	NS	NS	NS	NS	NS	NS	NS	NS	NS	NS	NS	intergenic	SALL3,TRNAK-UUU
24	1286105	2.42882e-07	NS	NS	NS	NS	NS	NS	NS	NS	NS	NS	NS	NS	NS	NS	NS	intergenic	SALL3,TRNAK-UUU
24	1560468	6.15003e-07	NS	NS	NS	NS	NS	NS	NS	NS	NS	NS	NS	NS	NS	NS	NS	intergenic	SALL3,TRNAK-UUU
24	1562642	7.90369e-08	NS	NS	NS	NS	NS	NS	NS	NS	NS	NS	NS	NS	NS	NS	NS	intergenic	SALL3,TRNAK-UUU
24	1562668	1.37422e-07	NS	NS	NS	NS	NS	NS	NS	NS	NS	NS	NS	NS	NS	NS	NS	intergenic	SALL3,TRNAK-UUU
24	4013051	NS	NS	1.35477e-07	NS	NS	NS	NS	NS	NS	NS	NS	NS	NS	NS	NS	NS	intronic	CNDP2
24	9370573	NS	NS	NS	NS	NS	NS	NS	NS	NS	NS	NS	NS	9.15211e-07	NS	NS	NS	intergenic	LOC100337355,DSEL
24	11455151	NS	5.65433e-07	NS	5.0332e-09	NS	5.10964e-07	NS	NS	NS	NS	NS	NS	NS	NS	NS	5.24934e-08	intergenic	CDH7,TRNAC-GCA
24	13350866	NS	8.90882e-08	NS	NS	3.30501e-07	1.62552e-07	NS	NS	NS	NS	NS	NS	NS	NS	NS	NS	intergenic	SYT4,PIK3C3
24	13359112	NS	3.34562e-07	NS	3.71099e-07	8.22122e-07	4.13261e-07	NS	NS	NS	NS	NS	NS	NS	NS	NS	NS	intergenic	SYT4,PIK3C3
24	14511704	NS	NS	5.07564e-08	NS	NS	NS	NS	NS	NS	NS	NS	NS	NS	NS	NS	NS	intergenic	LOC112444152,TRNAC-GCA
24	14511802	NS	NS	1.32094e-07	NS	NS	NS	NS	NS	NS	NS	NS	NS	NS	NS	NS	NS	intergenic	LOC112444152,TRNAC-GCA
24	16991086	NS	7.15681e-07	NS	NS	4.41286e-07	4.43308e-07	NS	NS	NS	NS	NS	NS	NS	NS	NS	NS	intergenic	NONE,TRNAK-UUU
24	17708364	NS	NS	NS	8.09403e-08	NS	NS	NS	NS	NS	NS	NS	NS	NS	NS	NS	NS	intergenic	TRNAK-UUU,TRNAW-CCA
24	18895344	NS	NS	1.62788e-07	5.55786e-07	NS	NS	NS	NS	NS	NS	NS	NS	NS	NS	NS	NS	intergenic	TRNAW-CCA,CELF4
24	18895631	NS	NS	1.11009e-07	1.53587e-07	NS	NS	NS	NS	NS	NS	NS	NS	NS	NS	NS	4.22099e-07	intergenic	TRNAW-CCA,CELF4
24	18895632	NS	NS	1.11009e-07	1.53587e-07	NS	NS	NS	NS	NS	NS	NS	NS	NS	NS	NS	4.22099e-07	intergenic	TRNAW-CCA,CELF4
24	20394329	NS	NS	NS	6.40459e-07	NS	NS	NS	NS	NS	NS	NS	NS	NS	NS	NS	4.23997e-07	intronic	FHOD3
24	22595460	NS	NS	9.47117e-07	NS	NS	NS	NS	NS	NS	NS	NS	NS	NS	NS	NS	NS	intergenic	DTNA,NOL4
24	24239268	NS	NS	NS	4.78979e-07	NS	NS	NS	NS	NS	NS	NS	NS	NS	NS	NS	NS	intergenic	CCDC178,KLHL14
24	24291039	NS	NS	NS	9.74208e-07	8.62775e-07	NS	NS	NS	NS	NS	NS	NS	NS	NS	NS	NS	intergenic	CCDC178,KLHL14
24	24726487	NS	NS	NS	NS	8.04652e-07	NS	NS	NS	NS	NS	NS	NS	NS	NS	NS	NS	intronic	GAREM1
24	27921623	NS	NS	NS	2.41926e-07	NS	NS	NS	NS	NS	NS	NS	NS	NS	NS	NS	NS	intergenic	DSC3,TRNAW-CCA
24	27924596	NS	NS	NS	4.49929e-07	NS	NS	NS	NS	NS	NS	NS	NS	NS	NS	NS	NS	intergenic	DSC3,TRNAW-CCA
24	27946026	NS	NS	NS	9.52826e-08	2.01096e-07	5.8184e-07	NS	NS	NS	NS	NS	NS	NS	NS	NS	4.31897e-07	intergenic	DSC3,TRNAW-CCA
24	27953970	NS	NS	NS	3.42382e-08	NS	7.58205e-07	NS	NS	NS	NS	NS	NS	NS	NS	NS	2.518e-07	intergenic	DSC3,TRNAW-CCA
24	28005420	NS	NS	NS	5.10863e-07	NS	NS	NS	NS	NS	NS	NS	NS	NS	NS	NS	NS	intergenic	DSC3,TRNAW-CCA
24	28243756	NS	5.57807e-07	8.3419e-07	3.88844e-10	1.23689e-08	1.45624e-08	NS	NS	NS	NS	7.38622e-08	NS	NS	NS	NS	2.66078e-08	intergenic	NONE,TRNAW-CCA
24	28245240	NS	NS	NS	2.26374e-07	NS	NS	NS	NS	NS	NS	NS	NS	NS	NS	NS	NS	intergenic	NONE,TRNAW-CCA
24	28248314	NS	NS	NS	3.0697e-07	NS	NS	NS	NS	NS	NS	NS	NS	NS	NS	NS	NS	intergenic	NONE,TRNAW-CCA
24	28258025	NS	NS	NS	NS	2.12727e-07	NS	NS	NS	NS	NS	NS	NS	NS	NS	NS	NS	intergenic	NONE,TRNAW-CCA
24	28448179	NS	NS	NS	4.90628e-07	NS	NS	NS	NS	NS	NS	NS	NS	NS	NS	NS	NS	intergenic	NONE,TRNAW-CCA
24	28940271	NS	NS	NS	2.1745e-07	7.07213e-07	9.54931e-07	NS	NS	NS	NS	NS	NS	NS	NS	NS	NS	intergenic	CDH2,CHST9
24	28941799	NS	NS	NS	3.67628e-07	3.60179e-07	8.72063e-07	NS	NS	NS	NS	NS	NS	NS	NS	NS	NS	intergenic	CDH2,CHST9
24	28958497	NS	8.41479e-07	NS	1.13455e-10	8.38238e-10	4.48887e-09	NS	NS	NS	NS	NS	NS	NS	NS	NS	3.93758e-07	intergenic	CDH2,CHST9
24	28965872	NS	NS	NS	3.05511e-07	7.68481e-08	1.71716e-07	NS	NS	NS	NS	NS	NS	NS	NS	NS	NS	intergenic	CDH2,CHST9
24	28965906	NS	NS	NS	4.18304e-07	8.78398e-08	2.77271e-07	NS	NS	NS	NS	NS	NS	NS	NS	NS	NS	intergenic	CDH2,CHST9
24	28966019	NS	NS	NS	1.2608e-07	1.2222e-07	4.6591e-07	NS	NS	NS	NS	NS	NS	NS	NS	NS	NS	intergenic	CDH2,CHST9
24	28968918	NS	NS	NS	9.85445e-08	5.46182e-07	NS	NS	NS	NS	NS	NS	NS	NS	NS	NS	6.20351e-07	intergenic	CDH2,CHST9
24	28968970	NS	NS	NS	1.90727e-07	9.50557e-07	NS	NS	NS	NS	NS	NS	NS	NS	NS	NS	NS	intergenic	CDH2,CHST9
24	28981919	NS	2.00711e-07	NS	2.23102e-10	3.7897e-10	2.02631e-09	NS	NS	NS	NS	4.15201e-07	NS	NS	NS	NS	5.46573e-07	intergenic	CDH2,CHST9
24	28981978	NS	7.99656e-08	NS	3.87543e-10	1.33948e-09	2.49522e-09	NS	NS	NS	NS	NS	NS	NS	NS	NS	2.4967e-07	intergenic	CDH2,CHST9
24	28983177	NS	NS	NS	4.65873e-07	4.18988e-07	NS	NS	NS	NS	NS	NS	NS	NS	NS	NS	NS	intergenic	CDH2,CHST9
24	28995372	NS	NS	NS	6.34571e-07	5.04785e-07	NS	NS	NS	NS	NS	NS	NS	NS	NS	NS	NS	intergenic	CDH2,CHST9
24	29000069	NS	NS	NS	3.19519e-07	NS	NS	NS	NS	NS	NS	NS	NS	NS	NS	NS	NS	intergenic	CDH2,CHST9
24	31584879	NS	NS	NS	NS	NS	NS	NS	NS	NS	NS	5.16887e-07	NS	NS	NS	NS	NS	intronic	ZNF521
24	33096991	NS	2.97236e-07	NS	4.87774e-08	1.01129e-08	1.63734e-08	NS	NS	NS	NS	NS	NS	NS	NS	NS	NS	intronic	NPC1
24	33109311	NS	NS	NS	NS	8.83548e-07	NS	NS	NS	NS	NS	NS	NS	NS	NS	NS	NS	intronic	RMC1
24	33218062	NS	3.31295e-07	NS	NS	NS	NS	NS	NS	NS	NS	NS	NS	NS	NS	NS	NS	intronic	TMEM241
24	33223584	NS	7.4167e-07	8.5119e-07	2.76962e-09	9.88384e-08	4.03686e-08	NS	NS	NS	NS	NS	NS	NS	NS	NS	2.20045e-07	intronic	TMEM241
24	33517091	NS	1.75247e-07	NS	3.48558e-07	7.32273e-08	7.37632e-08	NS	NS	NS	NS	NS	NS	NS	NS	NS	NS	intronic	RBBP8
24	35164199	NS	2.68548e-07	NS	NS	2.07667e-07	1.33326e-07	NS	NS	NS	NS	NS	NS	NS	NS	NS	NS	intronic	USP14
24	36009636	NS	NS	NS	NS	8.48815e-07	NS	NS	NS	NS	NS	NS	NS	NS	NS	NS	NS	intergenic	ADCYAP1,METTL4
24	36581624	NS	4.18971e-15	3.63508e-08	2.58095e-12	5.58463e-14	1.39138e-14	NS	NS	NS	1.21677e-08	NS	NS	NS	NS	NS	1.06627e-09	intergenic	ADCYAP1,METTL4
24	36581643	NS	1.80871e-08	NS	1.98758e-07	9.70533e-09	9.84961e-09	NS	NS	NS	NS	NS	NS	NS	NS	NS	7.63578e-08	intergenic	ADCYAP1,METTL4
24	36608194	NS	4.09874e-08	NS	NS	8.52894e-07	2.29986e-07	NS	NS	NS	NS	NS	NS	NS	NS	NS	NS	intergenic	ADCYAP1,METTL4
24	36636544	NS	NS	NS	9.59747e-07	2.59299e-07	7.7407e-07	NS	NS	NS	NS	NS	NS	NS	NS	NS	NS	intergenic	ADCYAP1,METTL4
24	36636607	NS	NS	NS	4.82654e-08	4.04429e-08	1.23635e-07	NS	NS	NS	4.15782e-07	NS	NS	NS	NS	NS	4.24239e-07	intergenic	ADCYAP1,METTL4
24	36636628	NS	NS	NS	5.13426e-07	9.48159e-07	NS	NS	NS	NS	NS	NS	NS	NS	NS	NS	NS	intergenic	ADCYAP1,METTL4
24	36637845	NS	1.57972e-07	NS	8.107e-08	3.76519e-08	3.17892e-08	NS	NS	NS	NS	NS	NS	NS	NS	NS	1.39664e-07	intergenic	ADCYAP1,METTL4
24	36637947	NS	NS	NS	3.75175e-07	3.94346e-07	6.34901e-07	NS	NS	NS	NS	NS	NS	NS	NS	NS	NS	intergenic	ADCYAP1,METTL4
24	36638721	NS	NS	NS	NS	6.57315e-07	9.74806e-07	NS	NS	NS	NS	NS	NS	NS	NS	NS	NS	intergenic	ADCYAP1,METTL4
24	36638808	NS	2.33131e-07	NS	2.71092e-07	1.26222e-07	9.00031e-08	NS	NS	NS	NS	NS	NS	NS	NS	NS	NS	intergenic	ADCYAP1,METTL4
24	36638833	NS	1.69879e-07	NS	6.40307e-07	3.61198e-07	1.60388e-07	NS	NS	NS	NS	NS	NS	NS	NS	NS	NS	intergenic	ADCYAP1,METTL4
24	36638839	NS	3.10681e-07	NS	NS	8.20945e-07	3.5482e-07	NS	NS	NS	NS	NS	NS	NS	NS	NS	NS	intergenic	ADCYAP1,METTL4
24	40852791	NS	6.23567e-07	NS	NS	1.16355e-07	2.70708e-07	NS	NS	NS	NS	NS	NS	NS	NS	NS	NS	intronic	PTPRM
24	42292921	NS	NS	NS	NS	NS	NS	NS	NS	NS	NS	NS	1.48389e-07	NS	NS	NS	NS	intronic	PIEZO2
24	47158129	NS	5.70402e-08	NS	NS	NS	6.43145e-07	NS	NS	NS	NS	NS	NS	NS	NS	NS	NS	intergenic	SKOR2,SMAD2
24	54894797	NS	NS	NS	NS	9.53221e-07	NS	NS	NS	NS	NS	NS	NS	NS	NS	NS	NS	intronic	TCF4
24	58351649	NS	NS	NS	NS	4.41077e-07	7.92679e-07	NS	NS	NS	NS	NS	NS	NS	NS	NS	NS	intergenic	LMAN1,CCBE1
24	58351661	NS	NS	NS	5.28613e-07	1.31151e-07	2.73939e-07	NS	NS	NS	NS	NS	NS	NS	NS	NS	NS	intergenic	LMAN1,CCBE1
24	58351691	NS	NS	NS	NS	2.40098e-07	5.78552e-07	NS	NS	NS	NS	NS	NS	NS	NS	NS	NS	intergenic	LMAN1,CCBE1
24	59342443	NS	NS	NS	NS	NS	NS	NS	NS	NS	NS	NS	NS	NS	NS	NS	6.15282e-07	intergenic	LOC529488,LOC112444177
24	60416966	NS	NS	NS	NS	3.60998e-07	8.45932e-07	NS	NS	NS	NS	NS	NS	NS	NS	NS	NS	intergenic	RNF152,PIGN
25	15259170	NS	7.81588e-08	NS	NS	5.60515e-07	1.76647e-07	NS	NS	NS	NS	NS	NS	NS	NS	NS	NS	intergenic	TRNAG-CCC,LOC100296255
25	15966202	NS	3.83178e-07	NS	NS	2.28234e-07	1.45839e-07	NS	NS	NS	NS	NS	NS	NS	NS	NS	NS	intergenic	XYLT1,RPS15A
25	15966218	NS	1.34697e-07	NS	NS	9.66483e-08	5.44674e-08	NS	NS	NS	NS	NS	NS	NS	NS	NS	NS	intergenic	XYLT1,RPS15A
25	15968171	NS	3.9285e-07	NS	NS	NS	NS	NS	NS	NS	NS	NS	NS	NS	NS	NS	NS	intergenic	XYLT1,RPS15A
25	15983219	NS	7.49603e-07	NS	NS	NS	NS	NS	NS	NS	NS	NS	NS	NS	NS	NS	NS	intergenic	XYLT1,RPS15A
25	19262952	NS	NS	NS	NS	NS	NS	NS	NS	NS	NS	NS	7.82299e-07	NS	NS	NS	NS	intronic	LOC524391
25	21866815	NS	NS	NS	NS	NS	NS	NS	NS	NS	NS	NS	NS	NS	8.92235e-07	NS	NS	intronic	PRKCB
25	22287312	NS	NS	NS	NS	NS	NS	NS	NS	NS	NS	5.95689e-07	2.29478e-07	NS	NS	NS	NS	intergenic	TRNAC-GCA,TNRC6A
25	22741983	NS	2.09624e-07	NS	7.31965e-07	2.62954e-07	1.46665e-07	NS	NS	NS	9.33142e-07	NS	NS	NS	NS	NS	NS	intronic	LCMT1
25	33220698	NS	NS	8.11672e-07	NS	NS	NS	NS	NS	NS	NS	NS	NS	NS	NS	NS	NS	intergenic	EIF4H,LIMK1
26	19045653	NS	NS	NS	NS	NS	NS	9.56252e-07	NS	NS	NS	NS	NS	NS	NS	NS	NS	intronic	CRTAC1
26	19842222	NS	NS	NS	NS	3.08179e-07	NS	NS	NS	NS	NS	NS	NS	NS	NS	NS	NS	intronic	HPSE2
26	19895873	NS	NS	NS	NS	6.30152e-07	NS	NS	NS	NS	NS	NS	NS	NS	NS	NS	2.70035e-07	intronic	HPSE2
26	20160455	NS	NS	1.48936e-07	NS	NS	NS	NS	NS	NS	NS	NS	NS	NS	NS	NS	NS	intronic	HPSE2
26	20584172	NS	3.49218e-07	NS	2.65916e-07	9.4043e-08	9.31402e-08	NS	NS	NS	NS	NS	NS	NS	NS	NS	3.76013e-07	intergenic	NKX2-3,SLC25A28
26	20792040	NS	NS	3.69208e-07	NS	NS	NS	NS	NS	NS	NS	NS	NS	NS	NS	NS	NS	intronic	ABCC2
26	21111702	NS	NS	NS	NS	NS	NS	6.71552e-07	NS	NS	NS	NS	NS	NS	NS	NS	NS	intronic	CHUK
26	21113974	NS	NS	NS	NS	NS	NS	8.82656e-07	NS	NS	NS	NS	NS	NS	NS	NS	NS	intronic	CHUK
26	22295059	NS	NS	NS	NS	NS	NS	1.65708e-07	NS	NS	NS	NS	NS	NS	NS	NS	NS	intronic	BTRC
26	22310885	NS	NS	NS	NS	NS	NS	2.54243e-07	NS	NS	NS	NS	NS	NS	NS	NS	NS	intergenic	BTRC,POLL
26	22403300	NS	NS	NS	NS	NS	NS	NS	NS	7.3028e-07	NS	NS	NS	NS	NS	NS	NS	intronic	FBXW4
26	23061815	NS	NS	6.01935e-07	NS	NS	NS	NS	NS	NS	NS	NS	NS	NS	NS	NS	NS	intergenic	MIR146B,MFSD13A
26	23273596	NS	NS	NS	NS	NS	NS	NS	NS	1.02937e-07	NS	NS	NS	NS	NS	NS	6.95075e-07	intronic	TRIM8
26	23382676	NS	NS	7.47684e-07	NS	NS	NS	NS	NS	NS	NS	NS	NS	NS	NS	NS	NS	intronic	WBP1L
26	23469026	NS	NS	NS	NS	NS	NS	NS	NS	8.42844e-07	NS	NS	NS	NS	NS	NS	NS	intergenic	LOC112441470,BORCS7
26	23526567	NS	NS	NS	NS	NS	NS	1.77474e-07	NS	7.20926e-07	NS	NS	NS	NS	NS	NS	NS	intergenic	AS3MT,CNNM2
26	23526586	NS	NS	NS	NS	NS	NS	5.50773e-07	NS	NS	NS	NS	NS	NS	NS	NS	NS	intergenic	AS3MT,CNNM2
26	23526643	NS	NS	NS	NS	NS	NS	2.92955e-07	NS	NS	NS	NS	NS	NS	NS	NS	NS	intergenic	AS3MT,CNNM2
26	23528363	NS	NS	NS	NS	NS	NS	NS	NS	1.32011e-07	NS	NS	NS	NS	NS	NS	NS	intergenic	AS3MT,CNNM2
26	23528372	NS	NS	NS	NS	NS	NS	NS	NS	2.51666e-07	NS	NS	NS	NS	NS	NS	NS	intergenic	AS3MT,CNNM2
26	23528457	NS	NS	NS	NS	NS	NS	NS	NS	2.98093e-07	NS	NS	NS	NS	NS	NS	NS	intergenic	AS3MT,CNNM2
26	23528719	NS	NS	NS	NS	NS	NS	NS	NS	3.56475e-07	NS	NS	NS	NS	NS	NS	NS	intergenic	AS3MT,CNNM2
26	23530849	NS	NS	NS	NS	NS	NS	NS	NS	3.03011e-07	NS	NS	NS	NS	NS	NS	NS	intergenic	AS3MT,CNNM2
26	23536137	NS	NS	NS	NS	NS	NS	NS	NS	8.29179e-07	NS	NS	NS	NS	NS	NS	NS	intergenic	AS3MT,CNNM2
26	24620612	NS	NS	NS	NS	NS	NS	6.59449e-07	NS	NS	NS	NS	NS	NS	NS	NS	NS	intronic	COL17A1
26	24664866	NS	NS	8.68106e-07	NS	NS	NS	NS	NS	NS	NS	7.80365e-07	NS	NS	NS	NS	8.61532e-07	intergenic	COL17A1,SFR1
26	25209683	NS	1.87073e-07	3.02758e-07	3.52365e-07	3.47712e-08	3.29097e-08	NS	NS	NS	NS	NS	NS	NS	NS	NS	9.41194e-07	intronic	SORCS3
26	25210690	NS	3.08928e-07	4.01728e-10	1.38286e-07	1.29237e-07	4.74499e-08	NS	NS	NS	NS	5.134e-07	NS	NS	NS	NS	4.27192e-08	intronic	SORCS3
26	25225333	NS	NS	7.92459e-07	NS	NS	NS	NS	NS	NS	NS	NS	NS	NS	NS	NS	NS	intronic	SORCS3
26	25243300	NS	NS	NS	9.23166e-07	NS	NS	NS	NS	NS	NS	NS	NS	NS	NS	NS	NS	intronic	SORCS3
26	25461064	NS	NS	NS	9.45673e-07	NS	NS	NS	NS	NS	NS	4.87531e-07	NS	NS	NS	NS	NS	intronic	SORCS3
26	25870829	NS	NS	NS	NS	NS	NS	1.98977e-08	NS	NS	NS	NS	NS	NS	NS	NS	NS	intronic	SORCS3
26	25870838	NS	NS	NS	NS	NS	NS	1.98977e-08	NS	NS	NS	NS	NS	NS	NS	NS	NS	intronic	SORCS3
26	25870848	NS	NS	NS	NS	NS	NS	2.70253e-07	NS	NS	NS	NS	NS	NS	NS	NS	NS	intronic	SORCS3
26	25873243	NS	NS	NS	NS	NS	NS	3.15921e-07	NS	NS	NS	NS	NS	NS	NS	NS	NS	intronic	SORCS3
26	26223691	NS	6.75743e-08	NS	8.59556e-07	3.70702e-08	4.71359e-08	NS	NS	NS	NS	NS	NS	NS	NS	NS	NS	intergenic	SORCS3,TRNAA-AGC
26	26273073	NS	NS	NS	4.52339e-07	NS	NS	NS	NS	NS	NS	NS	NS	NS	NS	NS	8.69135e-07	intergenic	SORCS3,TRNAA-AGC
26	26424741	NS	NS	NS	4.42176e-07	2.73201e-07	2.03708e-07	NS	NS	NS	1.96862e-07	6.59602e-08	NS	NS	NS	NS	4.34545e-08	intergenic	SORCS3,TRNAA-AGC
26	27030551	NS	NS	NS	9.12522e-07	NS	NS	NS	NS	NS	NS	NS	NS	NS	NS	NS	2.32833e-07	intergenic	TRNAA-AGC,SORCS1
26	27704109	NS	NS	7.51286e-08	NS	NS	NS	NS	NS	NS	NS	NS	NS	NS	NS	NS	NS	intronic	SORCS1
26	27820483	NS	6.12004e-07	NS	NS	NS	NS	NS	NS	NS	NS	NS	NS	NS	NS	NS	NS	intronic	SORCS1
26	27907008	NS	1.36594e-07	NS	NS	NS	9.6094e-07	NS	NS	NS	NS	NS	NS	NS	NS	NS	NS	intronic	SORCS1
26	28267158	NS	3.03344e-07	NS	9.33071e-09	2.08795e-08	2.08063e-08	NS	NS	NS	NS	7.2058e-08	NS	NS	NS	NS	1.86089e-08	intergenic	SORCS1,MIR2285K-4
26	28456046	NS	4.25447e-07	NS	NS	5.98143e-07	3.90437e-07	NS	NS	NS	NS	NS	NS	NS	NS	NS	NS	intergenic	SORCS1,MIR2285K-4
26	30044213	NS	NS	NS	NS	NS	NS	NS	NS	NS	NS	NS	NS	NS	NS	NS	8.85056e-07	intergenic	MIR2285K-4,XPNPEP1
26	30048859	NS	NS	NS	NS	NS	NS	NS	NS	NS	NS	1.50499e-07	9.16075e-07	NS	NS	NS	NS	intergenic	MIR2285K-4,XPNPEP1
26	30399645	NS	NS	NS	NS	2.311e-07	5.67772e-07	NS	NS	NS	NS	NS	NS	NS	NS	NS	NS	intergenic	MIR2285K-4,XPNPEP1
26	32829690	NS	NS	NS	NS	6.35834e-07	NS	NS	NS	NS	NS	NS	NS	NS	NS	NS	NS	intronic	TECTB
26	36126253	NS	NS	NS	NS	NS	NS	NS	NS	NS	NS	9.23215e-07	NS	NS	NS	NS	NS	intronic	ATRNL1
26	36126257	NS	NS	NS	NS	NS	NS	NS	NS	NS	NS	4.66748e-07	NS	NS	NS	NS	NS	intronic	ATRNL1
26	36129968	NS	NS	NS	NS	NS	NS	NS	NS	NS	NS	3.6498e-07	NS	NS	NS	NS	NS	intronic	ATRNL1
26	36130245	NS	NS	NS	NS	NS	NS	NS	NS	NS	NS	NS	1.72395e-07	NS	NS	NS	NS	intronic	ATRNL1
26	36131562	NS	NS	NS	NS	NS	NS	NS	NS	NS	NS	3.42762e-07	7.67509e-07	NS	NS	NS	NS	intronic	ATRNL1
26	36133399	NS	NS	NS	NS	NS	NS	NS	NS	NS	NS	6.59593e-07	NS	NS	NS	NS	NS	intronic	ATRNL1
26	36478485	NS	NS	NS	NS	NS	NS	NS	NS	NS	NS	NS	NS	NS	NS	NS	7.64818e-07	intronic	GFRA1
26	36499210	NS	NS	NS	NS	NS	NS	NS	NS	NS	NS	NS	NS	NS	NS	NS	4.79023e-07	intronic	GFRA1
26	37087285	NS	NS	6.8114e-07	NS	NS	NS	NS	NS	NS	NS	NS	NS	NS	NS	NS	NS	intronic	HSPA12A
26	40409277	NS	NS	NS	8.05739e-07	3.1952e-07	3.22822e-07	NS	NS	NS	NS	NS	NS	NS	NS	NS	NS	intergenic	SEC23IP,PLPP4
26	40604399	NS	NS	NS	9.16267e-07	NS	NS	NS	NS	NS	NS	NS	NS	NS	NS	NS	NS	intronic	PLPP4
26	41973137	NS	NS	NS	NS	NS	NS	NS	NS	NS	NS	9.39577e-07	NS	NS	NS	NS	NS	intronic	TACC2
26	41976170	NS	NS	NS	NS	NS	NS	NS	NS	NS	NS	9.18528e-07	NS	NS	NS	NS	NS	intronic	TACC2
26	42785577	NS	NS	NS	8.04369e-07	NS	NS	NS	NS	NS	NS	NS	NS	NS	NS	NS	NS	intronic	C26H10orf88
26	43324280	NS	NS	NS	NS	NS	NS	NS	NS	NS	NS	2.63498e-07	NS	NS	NS	NS	6.72527e-07	intergenic	BUB3,GPR26
26	49578307	NS	NS	NS	4.1632e-07	NS	NS	NS	NS	NS	NS	NS	NS	NS	NS	NS	NS	intergenic	GLRX3,TRNAC-ACA
27	44017	NS	6.36392e-07	NS	NS	NS	NS	NS	NS	NS	NS	NS	NS	NS	NS	NS	NS	intronic	LOC100848264
27	1181423	NS	NS	NS	1.50983e-07	NS	NS	NS	NS	NS	NS	2.70252e-07	NS	NS	NS	NS	NS	intronic	DLGAP2
27	1233020	NS	NS	NS	NS	NS	NS	NS	NS	NS	NS	NS	9.94599e-07	NS	NS	NS	NS	intronic	CLN8
27	3226001	NS	NS	NS	NS	NS	NS	NS	NS	NS	NS	4.73357e-07	NS	NS	NS	NS	NS	intronic	CSMD1
27	3235429	NS	NS	NS	1.14405e-07	NS	NS	NS	NS	NS	NS	9.30144e-10	3.5826e-09	NS	NS	NS	6.14305e-09	intronic	CSMD1
27	3235629	NS	NS	NS	NS	NS	NS	NS	NS	NS	NS	3.85916e-07	4.07173e-07	NS	NS	NS	NS	intronic	CSMD1
27	3236423	NS	NS	NS	NS	NS	NS	NS	NS	NS	NS	8.32586e-07	NS	NS	NS	NS	NS	intronic	CSMD1
27	3236703	NS	NS	NS	NS	NS	NS	NS	NS	NS	NS	2.56663e-07	7.43687e-08	NS	NS	NS	7.83692e-07	intronic	CSMD1
27	3237165	NS	NS	NS	NS	NS	NS	NS	NS	NS	NS	1.06771e-07	4.6077e-08	NS	NS	NS	7.21969e-07	intronic	CSMD1
27	3237192	NS	NS	NS	NS	NS	NS	NS	NS	NS	NS	4.30279e-07	9.68397e-08	NS	NS	NS	NS	intronic	CSMD1
27	6007505	NS	NS	NS	NS	NS	NS	NS	NS	NS	2.87992e-07	2.82131e-07	1.06862e-07	NS	NS	NS	5.6015e-07	intergenic	LOC100140788,TAP
27	6014283	NS	NS	NS	NS	NS	NS	NS	NS	NS	5.44963e-07	NS	NS	NS	NS	NS	7.00038e-07	intronic	TAP
27	6017310	NS	NS	NS	NS	NS	NS	NS	NS	NS	NS	NS	2.38936e-07	NS	NS	NS	NS	intergenic	TAP,LOC789175
27	6050304	NS	NS	NS	NS	NS	NS	NS	NS	NS	1.99765e-07	NS	NS	NS	NS	NS	NS	intronic	LOC101905775,SPAG11B
27	6050321	NS	NS	NS	NS	NS	NS	NS	NS	NS	5.50246e-07	NS	NS	NS	NS	NS	NS	intronic	LOC101905775,SPAG11B
27	6061442	NS	NS	NS	NS	NS	NS	NS	NS	NS	8.33217e-07	NS	NS	NS	NS	NS	NS	intronic	SPAG11B
27	6515188	NS	NS	NS	NS	NS	NS	NS	NS	NS	NS	NS	6.84461e-07	NS	NS	NS	NS	intergenic	LOC107131528,LOC112444640
27	6704065	NS	NS	NS	NS	NS	NS	NS	NS	NS	NS	1.04117e-08	3.86004e-10	NS	NS	NS	9.58924e-08	intergenic	DEFB7,DEFB1
27	7188683	NS	NS	NS	NS	NS	NS	NS	NS	NS	NS	NS	9.27661e-07	NS	NS	NS	NS	intergenic	EBD,LOC101907165
27	7202515	NS	NS	NS	NS	NS	NS	NS	NS	NS	NS	NS	5.87026e-07	NS	NS	NS	NS	intergenic	EBD,LOC101907165
27	8920462	NS	NS	NS	NS	NS	NS	8.24542e-07	NS	NS	NS	NS	NS	NS	NS	NS	NS	intergenic	AGA,NONE
27	9655027	NS	2.22321e-07	NS	NS	NS	NS	NS	NS	NS	NS	NS	NS	NS	NS	NS	NS	intergenic	AGA,TRNAS-ACU
27	11609979	4.93303e-08	NS	NS	NS	NS	NS	NS	NS	NS	NS	NS	NS	NS	NS	NS	NS	intergenic	TRNAS-ACU,TRNAC-GCA
27	11610004	1.69799e-07	NS	NS	NS	NS	NS	NS	NS	NS	NS	NS	NS	NS	NS	NS	NS	intergenic	TRNAS-ACU,TRNAC-GCA
27	11610048	2.00173e-07	NS	NS	NS	NS	NS	NS	NS	NS	NS	NS	NS	NS	NS	NS	NS	intergenic	TRNAS-ACU,TRNAC-GCA
27	44778358	NS	4.99749e-07	NS	NS	NS	NS	NS	NS	NS	NS	NS	NS	NS	NS	NS	NS	intergenic	TRNAW-CCA,TRNAG-GCC
28	13209097	NS	NS	NS	NS	NS	NS	4.04998e-09	NS	NS	NS	NS	NS	NS	NS	NS	NS	intronic	BMS1
28	14421951	NS	NS	NS	NS	NS	NS	NS	NS	8.41586e-07	NS	NS	NS	NS	NS	NS	NS	intergenic	BICC1,PHYHIPL
28	16748121	NS	NS	4.50719e-07	NS	NS	NS	NS	NS	NS	NS	NS	NS	NS	NS	NS	NS	intronic	RHOBTB1
28	19614601	NS	3.39447e-08	8.87158e-07	6.25844e-08	4.31708e-08	1.24483e-08	NS	NS	NS	NS	NS	NS	NS	NS	NS	NS	intronic	JMJD1C
28	24608178	NS	3.43113e-07	NS	7.61788e-08	1.08505e-07	8.27618e-08	NS	NS	NS	NS	NS	NS	NS	NS	NS	NS	intronic	MYPN
28	24608216	NS	8.75105e-07	NS	8.52491e-08	7.54584e-08	1.1186e-07	NS	NS	NS	NS	NS	NS	NS	NS	NS	NS	intronic	MYPN
28	24627950	NS	NS	NS	3.09501e-07	7.66505e-07	7.7043e-07	NS	NS	NS	NS	NS	NS	NS	NS	NS	NS	intronic	MYPN
28	24799789	NS	NS	NS	5.64876e-08	2.69112e-07	2.20688e-07	NS	NS	NS	NS	NS	NS	NS	NS	NS	NS	intronic	RUFY2
28	25853491	NS	3.96035e-08	NS	2.38768e-07	8.62273e-08	2.64243e-08	NS	NS	NS	NS	NS	NS	NS	NS	NS	NS	intronic	TSPAN15
28	26692334	NS	NS	1.35499e-07	NS	NS	NS	NS	NS	NS	NS	NS	NS	NS	NS	NS	NS	intronic	PALD1
28	29319582	NS	8.97504e-08	NS	1.06876e-09	6.58515e-09	5.27934e-09	NS	NS	NS	NS	NS	NS	NS	NS	NS	3.61722e-07	intronic	CFAP70
28	30833835	NS	NS	8.80534e-07	NS	NS	NS	NS	NS	NS	NS	NS	NS	NS	NS	NS	NS	intronic	DUPD1
28	33817159	NS	NS	9.88743e-07	NS	NS	NS	NS	NS	NS	NS	NS	NS	NS	NS	NS	NS	intergenic	RPS24,ZMIZ1
28	33819845	NS	NS	5.9365e-07	NS	NS	NS	NS	NS	NS	NS	NS	NS	NS	NS	NS	NS	intergenic	RPS24,ZMIZ1
28	33819871	NS	NS	3.08421e-07	NS	NS	NS	NS	NS	NS	NS	NS	NS	NS	NS	NS	NS	intergenic	RPS24,ZMIZ1
28	33820473	NS	NS	5.65573e-07	NS	NS	NS	NS	NS	NS	NS	NS	NS	NS	NS	NS	NS	intergenic	RPS24,ZMIZ1
28	35080586	NS	NS	7.77543e-09	1.10003e-08	3.91815e-08	5.02525e-08	NS	NS	NS	NS	NS	NS	NS	NS	NS	7.1754e-07	intergenic	ZCCHC24,ANXA11
28	35487273	NS	2.0065e-07	NS	2.57943e-07	NS	4.57686e-07	NS	NS	NS	NS	NS	NS	NS	NS	NS	NS	UTR5	LOC112444733
28	35541457	NS	NS	NS	6.22021e-08	3.19947e-08	7.5738e-08	NS	NS	NS	NS	NS	NS	NS	NS	NS	NS	intronic	LOC101907929
28	35541458	NS	NS	NS	6.22021e-08	3.19947e-08	7.5738e-08	NS	NS	NS	NS	NS	NS	NS	NS	NS	NS	intronic	LOC101907929
28	35641568	NS	NS	NS	2.00917e-08	7.35348e-07	2.95714e-07	NS	NS	NS	NS	NS	NS	NS	NS	NS	NS	upstream	MBL1
28	35643219	NS	NS	NS	6.43438e-08	1.76205e-07	2.5359e-07	NS	NS	NS	NS	NS	NS	NS	NS	NS	NS	intergenic	MBL1,SFTPA1
28	36031810	NS	NS	NS	5.34248e-07	NS	NS	NS	NS	NS	NS	NS	NS	NS	NS	NS	NS	intergenic	SH2D4B,NRG3
28	36075331	NS	NS	NS	5.92904e-07	9.44007e-07	NS	NS	NS	NS	NS	NS	NS	NS	NS	NS	NS	intergenic	SH2D4B,NRG3
28	37968678	NS	NS	NS	2.36431e-07	2.29512e-07	2.63406e-07	NS	NS	NS	NS	NS	NS	NS	NS	NS	9.53862e-07	intronic	NRG3
28	39736415	NS	NS	NS	1.74054e-07	4.50553e-07	6.80432e-07	NS	NS	NS	NS	NS	NS	NS	NS	NS	NS	intergenic	CCSER2,TRNAG-CCC
28	39749721	NS	NS	NS	9.10804e-07	NS	NS	NS	NS	NS	NS	NS	NS	NS	NS	NS	NS	intergenic	CCSER2,TRNAG-CCC
28	41496829	NS	1.90867e-08	NS	3.0004e-09	2.01186e-07	2.10725e-08	NS	NS	NS	NS	NS	NS	NS	NS	NS	2.95779e-07	intronic	BMPR1A
28	43864779	NS	NS	NS	2.70471e-07	NS	NS	NS	NS	NS	NS	NS	NS	NS	NS	NS	NS	intronic	OGDHL
29	2772847	NS	NS	NS	NS	NS	NS	NS	NS	NS	NS	NS	NS	NS	5.20677e-07	NS	NS	intergenic	FAT3,LOC112444871
29	3867200	NS	5.76599e-08	NS	2.72603e-07	4.28614e-08	3.59213e-08	NS	NS	NS	NS	NS	NS	NS	NS	NS	2.72424e-08	intergenic	FAT3,LOC112444871
29	6639473	NS	NS	NS	NS	NS	NS	NS	NS	NS	NS	NS	NS	5.40731e-07	NS	NS	NS	intronic	GRM5
29	6639537	NS	NS	NS	NS	NS	NS	NS	NS	NS	NS	NS	NS	3.77044e-07	NS	NS	NS	intronic	GRM5
29	14162506	NS	NS	NS	4.40018e-07	NS	NS	NS	NS	NS	NS	NS	NS	NS	NS	NS	2.09017e-07	intergenic	TRNAC-GCA,TRNAC-GCA
29	14250634	NS	NS	1.55809e-07	NS	NS	NS	NS	NS	NS	NS	NS	NS	NS	NS	NS	NS	intergenic	TRNAC-GCA,TRNAC-GCA
29	19560055	3.74404e-07	NS	NS	NS	NS	NS	NS	NS	NS	NS	NS	NS	NS	NS	NS	NS	intergenic	LOC112444840,LUZP2
29	22715431	NS	NS	NS	NS	NS	NS	NS	NS	NS	NS	NS	NS	4.53913e-07	NS	NS	NS	intergenic	ANO5,NELL1
29	23027050	NS	6.83494e-07	5.22112e-07	2.96528e-07	2.03357e-07	1.33705e-07	NS	NS	NS	NS	NS	NS	NS	NS	NS	4.64919e-07	intergenic	ANO5,NELL1
29	25625659	NS	NS	NS	NS	NS	NS	NS	NS	NS	NS	NS	NS	6.3453e-07	NS	NS	NS	intergenic	NAV2,E2F8
29	26142379	NS	NS	NS	NS	6.58998e-07	NS	NS	NS	NS	NS	NS	NS	NS	NS	NS	NS	intronic	UEVLD
29	26299584	NS	NS	NS	NS	7.4386e-07	NS	NS	NS	NS	NS	NS	NS	NS	NS	NS	NS	intronic	LDHA
29	26324636	NS	NS	NS	NS	1.7192e-07	NS	NS	NS	NS	NS	NS	NS	NS	NS	NS	NS	intergenic	LDHA,GTF2H1
29	26506074	NS	NS	NS	4.42845e-07	2.21316e-07	3.42522e-07	NS	NS	NS	NS	NS	NS	NS	NS	NS	7.12691e-07	UTR3	M-SAA3.2
29	26518544	NS	NS	NS	NS	NS	NS	NS	NS	NS	NS	5.52514e-07	NS	NS	NS	NS	NS	intergenic	M-SAA3.2,LOC513770
29	26537032	NS	NS	1.44391e-07	NS	7.03139e-07	6.63887e-07	NS	NS	NS	NS	NS	NS	NS	NS	NS	NS	intergenic	LOC513770,LOC504490
29	26861838	NS	4.03994e-07	NS	1.68662e-08	6.89132e-08	4.11093e-08	NS	NS	NS	NS	NS	NS	NS	NS	NS	NS	intergenic	LOC782329,LOC782288
29	26974132	NS	NS	NS	NS	NS	NS	NS	NS	NS	NS	1.82696e-07	NS	NS	NS	NS	NS	intergenic	LOC523680,LOC616631
29	27510802	NS	NS	NS	3.0215e-07	5.58754e-07	NS	NS	NS	NS	NS	2.2187e-07	NS	NS	NS	NS	5.36911e-08	intronic	LOC526276
29	27525386	NS	2.76859e-07	NS	5.17654e-07	1.42787e-07	6.94212e-08	NS	NS	NS	NS	NS	NS	NS	NS	NS	NS	intergenic	LOC526276,LOC616755
29	27539219	NS	NS	NS	NS	3.70319e-07	NS	NS	NS	NS	NS	1.14044e-07	3.18216e-07	NS	NS	NS	7.60591e-08	downstream	OR8G5
29	27542122	NS	1.65012e-07	2.05138e-09	5.86187e-08	2.28803e-07	3.41817e-08	NS	NS	NS	NS	NS	NS	NS	NS	NS	NS	intergenic	OR8G5,LOC100301297
29	27543521	NS	6.0254e-07	NS	7.63937e-08	1.22627e-08	2.66828e-08	NS	NS	NS	NS	NS	NS	NS	NS	NS	NS	intergenic	OR8G5,LOC100301297
29	27543531	NS	1.55149e-07	3.29786e-07	8.1139e-09	8.75741e-10	2.8741e-09	NS	NS	NS	NS	NS	NS	NS	NS	NS	2.21632e-07	intergenic	OR8G5,LOC100301297
29	27543532	NS	1.55149e-07	3.29786e-07	8.1139e-09	8.75741e-10	2.8741e-09	NS	NS	NS	NS	NS	NS	NS	NS	NS	2.21632e-07	intergenic	OR8G5,LOC100301297
29	27553902	NS	2.09157e-07	2.00708e-07	2.8239e-08	5.53529e-08	2.80167e-08	NS	NS	NS	NS	NS	NS	NS	NS	NS	7.2661e-08	intergenic	OR8G5,LOC100301297
29	27570092	NS	1.28366e-07	3.5651e-07	1.33082e-08	1.47606e-09	3.29043e-09	NS	NS	NS	NS	NS	NS	NS	NS	NS	NS	upstream	LOC100301297
29	27573442	NS	NS	NS	NS	NS	NS	NS	NS	NS	NS	NS	NS	NS	NS	NS	2.32776e-07	intergenic	LOC100301297,LOC788554
29	27575441	NS	1.78854e-07	NS	3.45547e-08	2.47661e-08	2.58466e-08	NS	NS	NS	NS	NS	NS	NS	NS	NS	8.23078e-07	intergenic	LOC100301297,LOC788554
29	27585937	NS	1.07837e-08	NS	4.71957e-10	1.34409e-10	3.3961e-10	NS	NS	NS	NS	NS	NS	NS	NS	NS	7.65251e-07	intergenic	LOC100301297,LOC788554
29	27631080	NS	NS	NS	5.94648e-07	NS	NS	NS	NS	NS	NS	NS	NS	NS	NS	NS	NS	intergenic	LOC788607,LOC531225
29	27639927	NS	NS	8.60583e-07	NS	3.22601e-07	3.4472e-07	NS	NS	NS	NS	NS	NS	NS	NS	NS	NS	intergenic	LOC788607,LOC531225
29	27640176	NS	NS	NS	NS	NS	NS	NS	NS	NS	NS	NS	NS	NS	NS	NS	9.35275e-07	intergenic	LOC788607,LOC531225
29	27640309	NS	NS	NS	NS	NS	NS	NS	NS	NS	NS	NS	NS	NS	NS	NS	6.05401e-07	intergenic	LOC788607,LOC531225
29	27656583	NS	NS	NS	NS	3.91027e-07	NS	NS	NS	NS	NS	NS	NS	NS	NS	NS	NS	intergenic	LOC531225,LOC785107
29	27687616	NS	NS	NS	2.5319e-08	2.58311e-10	8.77007e-09	NS	NS	NS	7.93299e-07	8.18444e-07	NS	NS	NS	NS	7.93796e-08	intergenic	LOC785107,LOC617119
29	27715468	NS	2.3211e-07	2.01933e-07	1.91677e-07	1.86562e-07	7.81249e-08	NS	NS	NS	NS	NS	NS	NS	NS	NS	1.56361e-07	intergenic	LOC782544,LOC511657
29	27936130	NS	NS	NS	NS	6.20852e-07	NS	NS	NS	NS	NS	NS	NS	NS	NS	NS	NS	upstream	LOC513334
29	28413185	NS	NS	NS	NS	3.88089e-07	5.5454e-07	NS	NS	NS	NS	NS	NS	NS	NS	NS	NS	intergenic	HEPACAM,CCDC15
29	28417866	NS	NS	NS	9.48336e-07	2.12338e-08	1.64234e-07	NS	NS	NS	NS	NS	NS	NS	NS	NS	NS	intergenic	HEPACAM,CCDC15
29	28594465	NS	2.28492e-07	4.94224e-07	1.34201e-07	7.25006e-08	5.35384e-08	NS	NS	NS	NS	NS	NS	NS	NS	NS	NS	intergenic	TMEM218,PKNOX2
29	33555034	6.8005e-07	NS	NS	NS	NS	NS	NS	NS	NS	NS	NS	NS	NS	NS	NS	NS	intronic	OPCML
29	36048775	NS	NS	1.73843e-07	NS	NS	NS	NS	NS	NS	NS	NS	NS	NS	NS	NS	NS	intronic	TMEM45B
29	36234957	6.65786e-07	NS	NS	NS	NS	NS	NS	NS	NS	NS	NS	NS	NS	NS	NS	NS	intergenic	PRDM10,APLP2
29	36234963	6.65786e-07	NS	NS	NS	NS	NS	NS	NS	NS	NS	NS	NS	NS	NS	NS	NS	intergenic	PRDM10,APLP2
29	37648496	NS	3.32539e-08	NS	NS	NS	NS	NS	NS	NS	NS	NS	NS	NS	NS	NS	NS	intergenic	PAG2,PAG12
29	39369167	NS	NS	5.61764e-07	NS	NS	NS	NS	NS	NS	NS	NS	NS	NS	NS	NS	NS	intergenic	PAG3,PAG6
29	39657767	NS	2.97889e-09	3.22512e-07	6.33978e-08	3.32993e-09	1.51579e-09	NS	NS	NS	NS	NS	NS	NS	NS	NS	NS	intergenic	LOC617765,LOC521902
29	39657858	NS	9.68551e-07	NS	NS	NS	NS	NS	NS	NS	NS	NS	NS	NS	NS	NS	NS	intergenic	LOC617765,LOC521902
29	39657903	NS	3.05246e-07	8.0234e-08	NS	NS	6.55216e-07	NS	NS	NS	NS	NS	NS	NS	NS	NS	NS	intergenic	LOC617765,LOC521902
29	39659878	NS	NS	3.89682e-07	NS	NS	NS	NS	NS	NS	NS	NS	NS	NS	NS	NS	NS	intergenic	LOC617765,LOC521902
29	39664520	NS	7.33976e-07	NS	NS	NS	5.987e-07	NS	NS	NS	NS	NS	NS	NS	NS	NS	NS	intronic	LOC521902
29	46813045	NS	7.97484e-07	NS	NS	NS	NS	NS	NS	NS	NS	NS	NS	NS	NS	NS	NS	intergenic	TPCN2,TRNAR-CCU
29	46831613	NS	NS	1.14838e-07	NS	NS	NS	NS	NS	NS	NS	NS	NS	NS	NS	NS	NS	intergenic	TRNAR-CCU,ORAOV1
29	46938780	NS	4.35506e-07	NS	NS	NS	NS	NS	NS	NS	NS	NS	NS	NS	NS	NS	NS	UTR3	FGF19
29	47108227	NS	2.40778e-07	NS	NS	NS	7.8147e-07	NS	NS	NS	NS	NS	NS	NS	NS	NS	NS	intergenic	FGF3,ANO1
29	47338445	NS	NS	5.43518e-07	NS	NS	NS	NS	NS	NS	NS	NS	NS	NS	NS	NS	NS	intronic	ANO1
29	47690011	NS	NS	5.84554e-07	NS	NS	NS	NS	NS	NS	NS	NS	NS	NS	NS	NS	NS	intronic	SHANK2
29	47694422	NS	NS	NS	NS	9.52124e-07	NS	NS	NS	NS	NS	NS	NS	NS	NS	NS	NS	intronic	SHANK2
29	47706261	NS	NS	NS	NS	7.78967e-07	NS	NS	NS	NS	NS	NS	NS	NS	NS	NS	NS	intronic	SHANK2
29	47707586	NS	3.3079e-07	3.21401e-08	8.68396e-07	4.1766e-07	1.65953e-07	NS	NS	NS	NS	NS	NS	NS	NS	NS	1.12992e-07	intronic	SHANK2
29	47708707	NS	NS	1.89801e-07	NS	NS	NS	NS	NS	NS	NS	NS	NS	NS	NS	NS	NS	intronic	SHANK2
29	47712793	NS	NS	2.34251e-07	NS	NS	NS	NS	NS	NS	NS	NS	NS	NS	NS	NS	6.53498e-07	intronic	SHANK2
29	47716761	NS	NS	1.13462e-07	NS	NS	NS	NS	NS	NS	NS	NS	NS	NS	NS	NS	6.15187e-07	intronic	SHANK2
29	47717392	NS	NS	8.4142e-08	NS	NS	NS	NS	NS	NS	NS	NS	NS	NS	NS	NS	NS	intronic	SHANK2
29	47717634	NS	NS	1.44663e-07	NS	NS	NS	NS	NS	NS	NS	NS	NS	NS	NS	NS	NS	intronic	SHANK2
29	47744649	NS	NS	4.48993e-07	NS	NS	NS	NS	NS	NS	NS	NS	NS	NS	NS	NS	9.03876e-07	intronic	SHANK2
29	47744700	NS	1.08866e-07	8.19401e-10	9.51827e-08	1.96191e-08	1.70046e-08	NS	NS	NS	NS	8.1885e-08	NS	NS	NS	NS	3.30408e-09	intronic	SHANK2
29	47744703	NS	1.08866e-07	8.19401e-10	9.51827e-08	1.96191e-08	1.70046e-08	NS	NS	NS	NS	8.1885e-08	NS	NS	NS	NS	3.30408e-09	intronic	SHANK2
29	47930568	NS	6.25628e-08	8.59872e-07	1.35555e-07	3.19733e-09	7.03401e-09	NS	NS	NS	NS	NS	NS	NS	NS	NS	6.41749e-07	intronic	SHANK2
29	47954985	NS	NS	9.01621e-07	NS	3.47261e-07	4.08536e-07	NS	NS	NS	NS	NS	NS	NS	NS	NS	NS	intronic	SHANK2
29	48481356	NS	NS	3.90586e-07	NS	NS	NS	NS	NS	NS	NS	NS	NS	NS	NS	NS	NS	intronic	OSBPL5
29	48559876	NS	NS	7.35146e-07	NS	NS	NS	NS	NS	NS	NS	NS	NS	NS	NS	NS	NS	intergenic	LOC510798,CARS
29	48623573	NS	NS	3.51351e-07	NS	NS	NS	NS	NS	NS	NS	NS	NS	NS	NS	NS	NS	upstream	NAP1L4
29	48701770	NS	NS	4.00228e-07	NS	NS	NS	NS	NS	NS	NS	NS	NS	NS	NS	NS	NS	intronic	SLC22A18
29	48711887	NS	NS	7.89065e-07	NS	NS	NS	NS	NS	NS	NS	NS	NS	NS	NS	NS	NS	intronic	SLC22A18
29	49200641	NS	4.28171e-07	4.0929e-07	6.61733e-07	1.27841e-07	1.00725e-07	NS	NS	NS	NS	NS	NS	NS	NS	NS	NS	intronic	CD81
29	49229237	NS	NS	5.09934e-08	NS	NS	NS	NS	NS	NS	NS	NS	NS	NS	NS	NS	NS	intergenic	CD81,TSPAN32
29	49229238	NS	NS	5.09934e-08	NS	NS	NS	NS	NS	NS	NS	NS	NS	NS	NS	NS	NS	intergenic	CD81,TSPAN32
29	49246161	NS	NS	9.80979e-07	NS	NS	NS	NS	NS	NS	NS	NS	NS	NS	NS	NS	NS	intergenic	CD81,TSPAN32
29	49275960	NS	NS	3.98119e-08	NS	7.23289e-07	NS	NS	NS	NS	NS	NS	NS	NS	NS	NS	NS	intronic	TSPAN32
29	49277597	NS	NS	6.30738e-07	NS	NS	NS	NS	NS	NS	NS	NS	NS	NS	NS	NS	NS	intronic	TSPAN32
29	49283841	NS	NS	5.68827e-07	NS	NS	NS	NS	NS	NS	NS	NS	NS	NS	NS	NS	NS	UTR5	TSPAN32
29	49286586	NS	NS	2.8618e-07	NS	NS	NS	NS	NS	NS	NS	NS	NS	NS	NS	NS	NS	intergenic	TSPAN32,ASCL2
29	49286665	NS	NS	7.83153e-08	NS	1.78182e-07	7.91773e-07	NS	NS	NS	NS	NS	NS	NS	NS	NS	NS	intergenic	TSPAN32,ASCL2
29	49287638	NS	NS	8.24132e-08	NS	NS	NS	NS	NS	NS	NS	NS	NS	NS	NS	NS	NS	intergenic	TSPAN32,ASCL2
29	49303873	NS	NS	8.54057e-09	1.51764e-07	1.14011e-07	1.28761e-07	NS	NS	NS	NS	NS	NS	NS	NS	NS	NS	intergenic	TSPAN32,ASCL2
29	49317008	NS	5.72981e-07	NS	NS	NS	NS	NS	NS	NS	NS	NS	NS	NS	NS	NS	NS	intergenic	ASCL2,TH
29	49329422	NS	7.04626e-07	NS	NS	NS	NS	NS	NS	NS	NS	NS	NS	NS	NS	NS	NS	intergenic	ASCL2,TH
29	49329614	NS	NS	2.30028e-07	NS	NS	NS	NS	NS	NS	NS	NS	NS	NS	NS	NS	NS	intergenic	ASCL2,TH
29	49365430	NS	5.2286e-07	NS	NS	NS	NS	NS	NS	NS	NS	NS	NS	NS	NS	NS	NS	intergenic	ASCL2,TH
29	50099571	NS	NS	3.20997e-07	NS	NS	NS	NS	NS	NS	NS	NS	NS	NS	NS	NS	NS	intronic	BRSK2
NS: No significance or suggestion (P > 1 × 10-6)

## Sheet: loci for OFT in Yunling
Associated loci	Leading SNP	Trait	Pvalue	Overlap for GWAS in Brahman and Yunling
1:114972815-115038771	1:115010567	APO, LFO	4.02489e-08	NO
1:117242621-117253440	1:117242621	RMO	6.54444e-10	NO
2:3337072-3510530	2:3383402	UFO	2.64212e-08	YES
2:32851718-33457027	2:33457027	STEP	5.10222e-08	NO
2:36269549-37550394	2:36474269	STEP	8.59464e-08	NO
2:93205291-95177443	2:93275093	HFO, LFO, POO, UFO	5.20139e-09	NO
2:99134812-99192001	2:99134847	LFO	1.09909e-08	NO
3:26325670-26433360	3:26325670	PC1, POO, UFO, VFO	8.80655e-09	NO
3:39522933-40604796	3:39562407	APO, HFO, LFO, PC1, POO, RMO, UFO, VFO	1.07839e-12	YES
3:42807111-42864592	3:42821620	LFO, PC1, POO	1.02834e-07	YES
3:94239145-94927516	3:94239192	LFO	2.69838e-08	NO
4:4671645-5335300	4:5335300	VFO	4.26468e-07	NO
4:7075259-8399451	4:7857368	VFO	5.33968e-08	YES
5:35889178-36080634	5:36002725	HSO, PNO	9.42405e-09	NO
5:40004231-40580569	5:40004231	PNO	2.10442e-07	NO
5:41271698-41730940	5:41712048	PC1	1.82652e-07	NO
5:51715731-51720484	5:51718569	LFO, POO	4.70565e-08	NO
5:69316620-69378967	5:69316620	VFO	3.04111e-08	NO
5:71723671-71736191	5:71728649	PC1, PNO	1.55328e-10	YES
5:116001243-116417044	5:116001243	PNO	6.58414e-09	YES
6:40020104-40729746	6:40159515	LFO, POO, UFO	1.89924e-08	NO
6:53570042-53573530	6:53570042	UFO	8.72077e-08	NO
7:10074359-10309808	7:10092771	FDO	1.01965e-07	NO
7:18875548-19068763	7:18881178	HSO	5.67126e-07	NO
7:30137924-31040044	7:30145754	APO, HFO, LFO, PC1, POO	2.66336e-09	NO
7:31493461-32537328	7:31493461	PNO	3.32683e-07	NO
7:35649550-35796923	7:35727767	PNO	1.71005e-08	NO
7:54540243-54820566	7:54735120	PNO	2.21103e-08	YES
7:57412878-57779659	7:57754315	HSO, PNO	5.67908e-08	YES
7:60349904-60424622	7:60424622	HSO	3.79281e-07	NO
7:64114020-64154798	7:64133541	PNO	6.01266e-11	YES
7:65609693-66095619	7:66066418	PNO	1.20422e-07	YES
7:67708694-67925008	7:67708694	PNO	2.0894e-07	NO
7:100854126-101780560	7:100854129	VFO	7.83925e-08	NO
7:110437297-110480733	7:110480733	VFO	3.79396e-10	NO
8:42315682-42321507	8:42315682	LHO	3.31265e-09	NO
8:67490395-68470099	8:67492507	HFO, LFO, POO, UFO, VFO	8.75868e-09	YES
9:13164036-14441392	9:14441392	VFO	9.81181e-10	NO
9:27576566-27669724	9:27658068	VFO	7.5164e-08	NO
9:29327954-30395011	9:29859248	VFO	3.56441e-08	NO
9:32871065-33530995	9:32898404	PC1, POO, UFO, VFO	1.60421e-10	YES
9:34008882-34169393	9:34018316	VFO	1.83206e-07	NO
9:37101374-37994518	9:37342800	HFO, LFO, PC1, POO, UFO, VFO	7.67963e-11	YES
9:38933783-39892622	9:38933783	VOC	2.88029e-08	NO
9:41316473-41321109	9:41316473	VFO	6.06532e-08	NO
9:43384151-43403811	9:43398644	LFO	1.045e-07	NO
9:53288479-54353457	9:54353457	VOC	6.55736e-08	YES
9:69360877-69897859	9:69474167	HFO, LFO, POO, RMO, UFO	1.8201e-09	NO
9:75241780-75743559	9:75699528	HFO, LFO, POO, UFO	1.88464e-08	NO
9:97993176-99137831	9:98287597	VFO	6.42062e-08	NO
10:42141365-42368448	10:42368448	FDO	3.05386e-08	NO
11:5473340-5521683	11:5473340	HFO, POO	4.08626e-08	YES
11:45788498-45815013	11:45814885	HFO, POO, UFO	8.51896e-08	YES
11:55983167-56394100	11:56300198	VFO	2.39605e-07	NO
11:90756667-94035011	11:93185097	APO, HFO, LFO, PC1, POO, UFO, VFO	7.79771e-11	YES
11:95182457-95287637	11:95247789	VFO	1.92675e-07	NO
11:99767866-101510541	11:101507629	HFO, LFO, POO, UFO	3.30679e-09	NO
12:7712581-8039882	12:8039882	HFO, LFO, POO, UFO	1.13471e-08	YES
12:11846636-12185741	12:11846650	HFO, LFO, POO, UFO	5.42134e-08	NO
12:22228961-22257149	12:22253539	HFO	4.32144e-07	NO
12:23609721-23724665	12:23724665	VFO	6.56438e-08	NO
13:898743-2163950	13:2163950	LFO	3.62682e-09	NO
13:36639669-37243773	13:36657818	LFO	7.88636e-12	NO
13:47107678-47572546	13:47249564	HFO, POO	3.18167e-07	YES
13:70665904-70695177	13:70695177	HFO, LFO, POO, UFO	3.28008e-09	NO
13:74128269-75330946	13:75314877	HFO, LFO, PC1, POO, UFO	1.95261e-09	YES
13:80421799-81250137	13:80421799	HFO, POO, UFO	7.4698e-11	NO
14:17494830-17697849	14:17696821	ACT	1.40543e-08	NO
14:28612358-29288857	14:28912463	LFO, UFO	1.18734e-07	NO
14:36255299-37348786	14:36484571	APO	2.36026e-08	NO
14:49009759-51857382	14:49956726	HFO, LFO, PC1, POO, UFO, VFO	5.40325e-11	YES
14:55369233-56446919	14:56203982	HFO, POO, UFO	5.06433e-10	NO
15:74945250-75186325	15:75184606	APO, FDO	6.70138e-08	NO
15:76378555-77255183	15:76434218	ACT	6.13058e-08	NO
16:31568420-31580820	16:31568426	HFO, POO	8.01789e-10	NO
16:34839620-38567367	16:36006797	VFO	5.23041e-09	NO
16:67535809-67777521	16:67535809	LHO	1.5848e-08	NO
16:71919685-72674658	16:72674658	VOC	2.52539e-08	NO
16:73867632-74885015	16:74774896	VOC	4.79731e-07	NO
18:16013622-16020256	18:16020147	LFO	3.05339e-08	NO
18:18337850-18557383	18:18337850	LFO	1.2276e-07	NO
18:23180079-23181404	18:23181404	HFO, LFO, POO, UFO	1.85874e-11	NO
18:46216051-46586446	18:46586446	HFO	6.05196e-07	NO
18:52004162-52493989	18:52004162	VFO	5.51359e-08	NO
19:1874679-2326002	19:2326002	STEP	9.47668e-08	NO
19:59183658-60755360	19:60168756	APO, FDO, HFO, LFO, PC1, POO	2.65095e-10	YES
20:1895365-2667381	20:2257104	UFO	1.41179e-07	NO
21:18076469-18279432	21:18279432	VOC	3.72473e-07	NO
21:22180531-22210414	21:22197840	VOC	1.60383e-07	NO
22:37865556-38539651	22:37865580	VFO	9.24262e-08	NO
23:1229821-1571435	23:1571435	HFO, LFO, POO, UFO, VFO	3.76294e-09	YES
23:46382552-47315482	23:47256898	HFO, LFO, POO, UFO, VFO	9.09846e-09	YES
24:1560468-1562668	24:1562642	LHO	7.90369e-08	NO
24:27921623-29000069	24:28958497	HFO, LFO, PC1, POO, UFO	1.13455e-10	YES
24:33096991-33517091	24:33096991	HFO, UFO	1.01129e-08	NO
24:36009636-36638839	24:36581624	HFO, LFO, PC1, POO, UFO	4.18971e-15	NO
25:15259170-15983219	25:15966218	HFO, POO, UFO	5.44674e-08	YES
26:19842222-20584172	26:20584172	HFO	9.4043e-08	NO
26:22403300-23536137	26:23273596	MHO, PNO	1.02937e-07	YES
26:24664866-26424741	26:25210690	APO, LFO, MHO, VFO	4.01728e-10	YES
26:27820483-28456046	26:28267158	POO, UFO	2.08063e-08	NO
26:36126253-36133399	26:36131562	APO	3.42762e-07	NO
27:3226001-3237192	27:3235429	APO, FDO, PC1	9.30144e-10	NO
27:6007505-7202515	27:6704065	FDO, PC1, RMO	3.86004e-10	NO
28:24608178-24799789	28:24799789	HFO, LFO, POO	5.64876e-08	NO
28:33817159-33820473	28:33819871	VFO	3.08421e-07	NO
28:35487273-36075331	28:35641568	HFO, LFO, POO	2.00917e-08	YES
29:26142379-28594465	29:27585937	APO, HFO, LFO, PC1, POO, UFO, VFO	1.34409e-10	YES
29:39369167-39664520	29:39657767	POO, UFO, VFO	1.51579e-09	YES
29:46813045-50099571	29:47744703	HFO, LFO, PC1, POO, UFO, VFO	8.19401e-10	YES

## Sheet: SNP for NOT in Yunling
Chromosome	Position	LHN	UFN	VFN	LFN	HFN	PON	MHN	HSN	PNN	RMN	APN	FDN	LAT	DUR	PC1	Func.refGene	Gene.refGene
1	2287617	1.50301e-07	NA	NA	NA	NA	NA	NA	NA	NA	NA	NA	NA	NA	NA	NA	intronic	IL10RB
1	2423138	NA	6.53911e-07	3.49575e-08	NA	NA	NA	NA	NA	NA	NA	NA	NA	NA	NA	NA	intergenic	LOC526226,OLIG1
1	4113603	1.69373e-07	NA	NA	NA	NA	NA	NA	NA	NA	NA	NA	NA	NA	NA	NA	intronic	TIAM1
1	4113610	3.9204e-07	NA	NA	NA	NA	NA	NA	NA	NA	NA	NA	NA	NA	NA	NA	intronic	TIAM1
1	6397786	NA	9.06457e-07	NA	8.31878e-07	NA	NA	NA	NA	NA	NA	NA	NA	NA	NA	NA	intronic	GRIK1
1	6397791	NA	9.06457e-07	NA	8.31878e-07	NA	NA	NA	NA	NA	NA	NA	NA	NA	NA	NA	intronic	GRIK1
1	7853996	NA	NA	8.16197e-07	NA	NA	NA	NA	NA	NA	NA	NA	NA	NA	NA	NA	intergenic	N6AMT1,LOC112447279
1	8187025	NA	2.45905e-07	NA	NA	NA	NA	NA	NA	NA	NA	NA	NA	NA	NA	NA	intergenic	N6AMT1,LOC112447279
1	8187026	NA	2.45905e-07	NA	NA	NA	NA	NA	NA	NA	NA	NA	NA	NA	NA	NA	intergenic	N6AMT1,LOC112447279
1	10159953	NA	NA	9.03094e-08	NA	NA	NA	NA	NA	NA	NA	NA	NA	NA	NA	NA	intergenic	NONE,APP
1	10238239	NA	NA	NA	NA	NA	NA	NA	NA	NA	NA	NA	NA	NA	7.82666e-07	NA	intronic	APP
1	11862858	NA	9.34147e-08	3.38019e-08	NA	NA	NA	NA	NA	NA	NA	NA	NA	NA	NA	NA	intergenic	MIR155,NONE
1	11869983	NA	NA	6.72783e-07	NA	NA	NA	NA	NA	NA	NA	NA	NA	NA	NA	NA	intergenic	MIR155,NONE
1	11876789	NA	NA	2.3743e-07	NA	NA	NA	NA	NA	NA	NA	NA	NA	NA	NA	NA	intergenic	MIR155,NONE
1	12061002	NA	NA	8.4808e-09	6.43524e-08	NA	1.78435e-07	NA	NA	NA	NA	NA	NA	NA	NA	NA	intergenic	MIR155,NONE
1	12065552	NA	NA	NA	8.40296e-07	NA	NA	NA	NA	NA	NA	NA	NA	NA	NA	NA	intergenic	MIR155,NONE
1	12102938	NA	NA	1.89486e-07	6.99963e-07	NA	7.63211e-07	NA	NA	NA	NA	NA	NA	NA	NA	NA	intergenic	MIR155,NONE
1	12124417	NA	NA	5.01681e-09	1.56626e-07	NA	2.74859e-07	NA	NA	NA	NA	NA	NA	NA	NA	NA	intergenic	MIR155,NONE
1	12241401	NA	NA	NA	2.66717e-07	NA	NA	NA	NA	NA	NA	NA	NA	NA	NA	NA	intergenic	MIR155,NONE
1	12244472	NA	NA	NA	1.62509e-07	NA	NA	NA	NA	NA	NA	NA	NA	NA	NA	NA	intergenic	MIR155,NONE
1	12352588	NA	NA	2.85714e-08	4.17216e-07	NA	6.09406e-07	NA	NA	NA	NA	NA	NA	NA	NA	NA	intergenic	MIR155,NONE
1	12352723	NA	NA	NA	9.07366e-07	NA	NA	NA	NA	NA	NA	NA	NA	NA	NA	NA	intergenic	MIR155,NONE
1	12396906	NA	NA	NA	3.49191e-08	NA	2.85441e-07	NA	NA	NA	NA	NA	NA	NA	NA	NA	intergenic	MIR155,NONE
1	13028963	NA	NA	NA	NA	NA	NA	NA	NA	NA	NA	NA	NA	NA	5.04521e-07	NA	intergenic	NONE,NONE
1	14023708	NA	NA	NA	NA	NA	NA	NA	NA	NA	NA	NA	NA	NA	1.14262e-08	NA	intergenic	NONE,NCAM2
1	14070464	NA	NA	NA	NA	NA	NA	NA	NA	NA	NA	NA	NA	NA	5.01912e-09	NA	intergenic	NONE,NCAM2
1	14519572	NA	NA	NA	NA	NA	NA	NA	NA	NA	NA	NA	NA	NA	9.75558e-08	NA	intergenic	NONE,NCAM2
1	16289514	NA	NA	NA	NA	NA	NA	NA	NA	NA	NA	NA	NA	3.2226e-07	NA	NA	intergenic	NCAM2,TRNAC-GCA
1	16289529	NA	NA	NA	NA	NA	NA	NA	NA	NA	NA	NA	NA	5.39618e-07	NA	NA	intergenic	NCAM2,TRNAC-GCA
1	18414731	NA	NA	NA	NA	NA	NA	NA	NA	NA	NA	NA	NA	NA	2.24139e-07	NA	intergenic	TRNAC-GCA,TMPRSS15
1	18414739	NA	NA	NA	NA	NA	NA	NA	NA	NA	NA	NA	NA	NA	1.98857e-07	NA	intergenic	TRNAC-GCA,TMPRSS15
1	18414755	NA	NA	NA	NA	NA	NA	NA	NA	NA	NA	NA	NA	NA	1.98857e-07	NA	intergenic	TRNAC-GCA,TMPRSS15
1	18414756	NA	NA	NA	NA	NA	NA	NA	NA	NA	NA	NA	NA	NA	1.98857e-07	NA	intergenic	TRNAC-GCA,TMPRSS15
1	20377072	NA	NA	3.0391e-07	7.56325e-08	NA	6.26998e-07	NA	NA	NA	NA	NA	NA	NA	NA	NA	intergenic	CXADR,MIR125B-2
1	23366965	NA	NA	7.8389e-07	NA	NA	NA	NA	NA	NA	NA	NA	NA	NA	NA	NA	intergenic	LIPI,ROBO2
1	23379400	NA	7.09872e-09	2.907e-09	1.1882e-07	NA	7.62126e-08	NA	NA	NA	NA	NA	NA	NA	NA	NA	intergenic	LIPI,ROBO2
1	23382277	NA	NA	4.24308e-07	NA	NA	NA	NA	NA	NA	NA	NA	NA	NA	NA	NA	intergenic	LIPI,ROBO2
1	23382297	NA	1.10778e-09	1.2936e-10	8.17198e-09	NA	8.40163e-09	NA	NA	NA	NA	NA	NA	NA	NA	NA	intergenic	LIPI,ROBO2
1	23382463	NA	NA	4.74863e-07	NA	NA	NA	NA	NA	NA	NA	NA	NA	NA	NA	NA	intergenic	LIPI,ROBO2
1	23384230	NA	NA	2.4307e-07	7.98988e-07	NA	NA	NA	NA	NA	NA	NA	NA	NA	NA	NA	intergenic	LIPI,ROBO2
1	23394660	NA	NA	1.65004e-07	NA	NA	NA	NA	NA	NA	NA	NA	NA	NA	NA	NA	intergenic	LIPI,ROBO2
1	23667488	NA	NA	4.79934e-08	NA	NA	NA	NA	NA	NA	NA	NA	NA	NA	NA	NA	intergenic	LIPI,ROBO2
1	24133138	NA	NA	1.32879e-07	NA	NA	NA	NA	NA	NA	NA	NA	NA	NA	NA	NA	intergenic	LIPI,ROBO2
1	24559570	NA	6.22063e-07	2.97033e-09	NA	NA	NA	NA	NA	NA	NA	NA	NA	NA	NA	NA	intronic	ROBO2
1	28667152	NA	NA	NA	NA	NA	NA	NA	NA	NA	NA	NA	NA	NA	6.90892e-07	NA	intergenic	TRNAC-ACA,TRNAS-GGA
1	31500389	NA	NA	NA	NA	NA	NA	NA	NA	NA	NA	NA	NA	NA	3.76676e-07	NA	intergenic	TRNAC-GCA,CADM2
1	33794663	NA	NA	NA	NA	NA	NA	NA	NA	NA	NA	NA	NA	NA	3.84909e-07	NA	intronic	CADM2
1	42254545	NA	8.78531e-07	NA	NA	NA	NA	NA	NA	NA	NA	NA	NA	NA	NA	NA	intronic	GABRR3
1	51479255	NA	7.00545e-08	3.61744e-07	4.83545e-07	NA	7.31738e-07	NA	NA	NA	NA	NA	NA	NA	NA	NA	intergenic	CBLB,MIR2286
1	51479275	NA	5.31392e-09	3.41347e-08	4.79665e-08	NA	7.87448e-08	NA	NA	NA	NA	NA	NA	NA	NA	NA	intergenic	CBLB,MIR2286
1	61821147	NA	NA	NA	9.38243e-07	NA	NA	NA	NA	NA	NA	NA	NA	NA	NA	NA	intergenic	TRNAC-GCA,TRNAR-GCG
1	63278529	NA	NA	NA	NA	NA	NA	NA	NA	NA	NA	NA	NA	NA	3.99721e-07	NA	intergenic	TRNAR-GCG,IGSF11
1	68099710	NA	NA	NA	1.57755e-07	NA	NA	NA	NA	NA	NA	NA	NA	NA	NA	NA	intronic	MYLK
1	73163175	NA	NA	NA	NA	NA	NA	NA	NA	NA	NA	NA	NA	NA	6.73526e-08	NA	intronic	LRRC15
1	75847353	NA	NA	1.81572e-07	NA	NA	NA	NA	NA	NA	NA	NA	NA	NA	NA	NA	intergenic	LOC112448255,CCDC50
1	76177069	NA	NA	NA	3.47313e-07	NA	NA	NA	NA	NA	NA	NA	NA	NA	NA	NA	intergenic	LOC614619,GMNC
1	80694911	NA	NA	1.98906e-07	5.84889e-08	NA	1.97189e-07	NA	NA	NA	NA	NA	NA	NA	NA	NA	intronic	CRYGS
1	81043159	NA	NA	NA	2.40708e-08	NA	3.8137e-07	NA	NA	NA	NA	NA	NA	NA	NA	NA	intronic	DGKG
1	84825709	NA	5.17553e-07	NA	1.61003e-07	2.93578e-07	7.83676e-08	NA	NA	NA	NA	NA	NA	NA	NA	NA	intergenic	TRNAS-GGA,TRNAR-UCU
1	84861207	NA	NA	NA	8.23481e-07	NA	NA	NA	NA	NA	NA	NA	NA	NA	NA	NA	intergenic	TRNAS-GGA,TRNAR-UCU
1	84875703	NA	4.87136e-07	NA	NA	NA	9.92614e-07	NA	NA	NA	NA	NA	NA	NA	NA	NA	intergenic	TRNAS-GGA,TRNAR-UCU
1	87470434	NA	4.22951e-07	NA	NA	NA	NA	NA	NA	NA	NA	NA	NA	NA	NA	NA	intronic	USP13
1	96021243	NA	NA	NA	NA	NA	NA	NA	NA	NA	NA	NA	NA	NA	9.07052e-07	NA	upstream	TNIK
1	96030984	NA	NA	NA	NA	NA	NA	NA	NA	NA	NA	NA	NA	NA	3.06771e-07	NA	intronic	TNIK
1	96031129	NA	NA	NA	NA	NA	NA	NA	NA	NA	NA	NA	NA	NA	2.37941e-08	NA	intronic	TNIK
1	98692141	NA	NA	NA	NA	NA	NA	NA	NA	NA	NA	NA	NA	NA	5.40959e-08	NA	intronic	LOC107131228
1	98692163	NA	NA	NA	NA	NA	NA	NA	NA	NA	NA	NA	NA	NA	6.38543e-07	NA	intronic	LOC107131228
1	98692177	NA	NA	NA	NA	NA	NA	NA	NA	NA	NA	NA	NA	NA	2.7105e-07	NA	intronic	LOC107131228
1	99537890	NA	NA	NA	NA	NA	NA	NA	NA	NA	NA	NA	NA	NA	1.73247e-07	NA	intergenic	GOLIM4,LRRC77
1	100651857	NA	NA	NA	NA	NA	NA	NA	NA	NA	NA	NA	NA	NA	7.18711e-07	NA	intergenic	ZBBX,BCHE
1	100670073	NA	NA	NA	NA	NA	NA	NA	NA	NA	NA	NA	NA	NA	2.57075e-07	NA	intergenic	ZBBX,BCHE
1	100893655	NA	NA	NA	NA	NA	NA	8.82312e-07	NA	NA	NA	NA	NA	NA	NA	NA	intergenic	ZBBX,BCHE
1	100979850	NA	5.04448e-07	3.4023e-07	NA	NA	NA	NA	NA	NA	NA	NA	NA	NA	NA	NA	intergenic	ZBBX,BCHE
1	102243340	NA	NA	NA	NA	9.77348e-07	NA	NA	NA	NA	NA	NA	NA	NA	NA	NA	intergenic	SLITRK3,SI
1	102251827	NA	NA	NA	2.42896e-07	3.64284e-07	5.16431e-07	NA	NA	NA	NA	NA	NA	NA	NA	NA	intergenic	SLITRK3,SI
1	102256715	NA	NA	NA	1.30184e-07	NA	NA	NA	NA	NA	NA	NA	NA	NA	NA	NA	intergenic	SLITRK3,SI
1	102348123	NA	NA	NA	5.48588e-07	NA	NA	NA	NA	NA	NA	NA	NA	NA	NA	NA	intronic	SI
1	102650046	NA	NA	NA	NA	NA	NA	NA	NA	NA	NA	NA	NA	NA	4.15602e-08	NA	intergenic	SI,TRNAS-GGA
1	102658413	NA	NA	NA	NA	NA	NA	NA	NA	NA	NA	NA	NA	NA	1.15927e-07	NA	intergenic	SI,TRNAS-GGA
1	102661488	NA	NA	NA	NA	NA	NA	NA	NA	NA	NA	NA	NA	NA	3.21042e-08	NA	intergenic	SI,TRNAS-GGA
1	102661492	NA	NA	NA	NA	NA	NA	NA	NA	NA	NA	NA	NA	NA	3.21042e-08	NA	intergenic	SI,TRNAS-GGA
1	102675105	NA	NA	NA	NA	NA	NA	NA	NA	NA	NA	NA	NA	NA	2.30817e-09	NA	intergenic	SI,TRNAS-GGA
1	102675131	NA	NA	NA	NA	NA	NA	NA	NA	NA	NA	NA	NA	NA	7.773e-09	NA	intergenic	SI,TRNAS-GGA
1	102680169	NA	NA	NA	NA	NA	NA	NA	NA	NA	NA	NA	NA	NA	8.52846e-08	NA	intergenic	SI,TRNAS-GGA
1	102680224	NA	NA	NA	NA	NA	NA	NA	NA	NA	NA	NA	NA	NA	2.64771e-10	NA	intergenic	SI,TRNAS-GGA
1	102680270	NA	NA	NA	NA	NA	NA	NA	NA	NA	NA	NA	NA	NA	1.67712e-08	NA	intergenic	SI,TRNAS-GGA
1	104350794	NA	NA	NA	NA	NA	NA	NA	NA	NA	NA	NA	NA	NA	9.56282e-07	NA	intergenic	SI,TRNAS-GGA
1	105605339	NA	NA	7.82374e-07	NA	NA	NA	NA	NA	NA	NA	NA	NA	NA	NA	NA	intergenic	TRNAS-GGA,TRNAW-CCA
1	105605345	NA	NA	7.82374e-07	NA	NA	NA	NA	NA	NA	NA	NA	NA	NA	NA	NA	intergenic	TRNAS-GGA,TRNAW-CCA
1	105633953	NA	6.51258e-07	7.37854e-07	8.01951e-08	NA	2.99991e-07	NA	NA	NA	NA	NA	NA	NA	NA	NA	intergenic	TRNAS-GGA,TRNAW-CCA
1	105657136	NA	NA	NA	3.62593e-07	NA	NA	NA	NA	NA	NA	NA	NA	NA	NA	NA	intergenic	TRNAS-GGA,TRNAW-CCA
1	105662595	NA	6.03743e-09	9.05884e-10	2.34783e-11	4.22181e-08	3.5385e-10	NA	NA	NA	NA	7.69187e-07	NA	NA	NA	6.02323e-07	intergenic	TRNAS-GGA,TRNAW-CCA
1	105677868	NA	1.58944e-07	1.59662e-07	2.27619e-09	NA	3.04076e-08	NA	NA	NA	NA	NA	NA	NA	NA	NA	intergenic	TRNAS-GGA,TRNAW-CCA
1	105692922	NA	NA	NA	1.49751e-07	NA	NA	NA	NA	NA	NA	NA	NA	NA	NA	NA	intergenic	TRNAS-GGA,TRNAW-CCA
1	105743389	NA	NA	NA	6.05131e-07	NA	NA	NA	NA	NA	NA	NA	NA	NA	NA	NA	intergenic	TRNAS-GGA,TRNAW-CCA
1	105766694	NA	7.52162e-07	5.74526e-07	7.2892e-09	NA	8.1537e-08	NA	NA	NA	NA	NA	NA	NA	NA	NA	intergenic	TRNAS-GGA,TRNAW-CCA
1	105766768	NA	NA	NA	9.43535e-08	NA	NA	NA	NA	NA	NA	NA	NA	NA	NA	NA	intergenic	TRNAS-GGA,TRNAW-CCA
1	106258259	NA	NA	8.16399e-07	NA	NA	NA	NA	NA	NA	NA	NA	NA	NA	NA	NA	intergenic	NMD3,B3GALNT1
1	106777572	NA	2.90477e-07	2.47029e-08	4.37742e-07	NA	6.90562e-08	NA	NA	NA	NA	NA	NA	NA	NA	NA	intergenic	PPM1L,ARL14
1	107423634	NA	NA	NA	7.27937e-07	NA	NA	NA	NA	NA	NA	NA	NA	NA	NA	NA	intronic	LOC511229
1	108915892	NA	NA	NA	2.37735e-07	NA	7.3616e-07	NA	NA	NA	NA	NA	NA	NA	NA	NA	intronic	MLF1
1	109814352	NA	NA	NA	NA	NA	NA	NA	NA	NA	NA	NA	NA	NA	6.52313e-07	NA	intergenic	SHOX2,VEPH1
1	109847611	NA	NA	NA	NA	NA	NA	NA	NA	NA	NA	NA	NA	NA	2.13152e-07	NA	intergenic	SHOX2,VEPH1
1	111122688	NA	NA	7.07603e-07	NA	NA	NA	NA	NA	NA	NA	NA	NA	NA	NA	NA	intronic	KCNAB1
1	112011888	NA	NA	NA	NA	NA	NA	8.44437e-07	NA	NA	NA	NA	NA	NA	NA	NA	intronic	PLCH1
1	112796462	NA	NA	NA	7.2126e-07	NA	NA	NA	NA	NA	NA	NA	NA	NA	NA	NA	intergenic	MME,TRNAK-UUU
1	112796470	NA	NA	NA	7.2126e-07	NA	NA	NA	NA	NA	NA	NA	NA	NA	NA	NA	intergenic	MME,TRNAK-UUU
1	115225622	NA	3.96441e-07	NA	NA	NA	NA	NA	NA	NA	NA	NA	NA	NA	NA	NA	intergenic	P2RY1,MBNL1
1	116905083	NA	2.99625e-08	NA	NA	NA	NA	NA	NA	NA	NA	NA	NA	NA	NA	NA	intronic	MED12L
1	116905234	NA	1.98362e-10	9.13476e-10	1.41261e-07	NA	2.24877e-08	NA	NA	NA	NA	NA	NA	NA	NA	4.7809e-07	intronic	MED12L
1	116905593	NA	NA	8.27299e-07	NA	NA	NA	NA	NA	NA	NA	NA	NA	NA	NA	NA	intronic	MED12L
1	117406275	NA	8.73614e-07	NA	NA	NA	NA	NA	NA	NA	NA	NA	NA	NA	NA	NA	intergenic	TRNAR-CCU,ERICH6
1	117607925	NA	NA	2.01756e-07	NA	NA	NA	NA	NA	NA	NA	NA	NA	NA	NA	NA	intergenic	SERP1,TSC22D2
1	117779234	NA	NA	NA	1.84418e-07	NA	NA	NA	NA	NA	NA	NA	NA	NA	NA	NA	intergenic	TSC22D2,PFN2
1	119552218	NA	5.69014e-07	NA	NA	NA	NA	NA	NA	NA	NA	NA	NA	NA	NA	NA	intergenic	AGTR1,LOC786256
1	122009296	NA	NA	NA	NA	NA	NA	NA	NA	NA	NA	NA	NA	NA	1.14837e-07	NA	intronic	PLSCR1
1	123867723	2.27668e-07	NA	NA	NA	NA	NA	NA	NA	NA	NA	NA	NA	NA	NA	NA	intergenic	PLOD2,C1H3orf58
1	125238242	NA	3.53915e-07	NA	NA	NA	NA	NA	NA	NA	NA	NA	NA	NA	NA	NA	intronic	SLC9A9
1	132150571	1.34824e-07	NA	NA	NA	NA	NA	NA	NA	NA	NA	NA	NA	NA	NA	NA	intergenic	TRNAG-CCC,IL20RB
1	135017301	NA	7.95405e-08	7.19333e-08	NA	NA	NA	NA	NA	NA	NA	NA	NA	NA	NA	NA	intergenic	AMOTL2,RYK
1	137878599	NA	NA	NA	NA	NA	NA	NA	NA	NA	NA	NA	NA	NA	2.2809e-07	NA	intronic	CPNE4
1	140427341	NA	7.68937e-08	1.67328e-07	NA	NA	NA	NA	NA	NA	NA	NA	NA	NA	NA	NA	intronic	DSCAM
1	140427367	NA	7.68937e-08	1.67328e-07	NA	NA	NA	NA	NA	NA	NA	NA	NA	NA	NA	NA	intronic	DSCAM
1	140427588	NA	3.65361e-07	7.98035e-07	NA	NA	NA	NA	NA	NA	NA	NA	NA	NA	NA	NA	intronic	DSCAM
1	142480311	NA	4.04935e-07	NA	NA	NA	NA	NA	NA	NA	NA	NA	NA	NA	NA	NA	intergenic	UMODL1,ABCG1
1	142608979	NA	1.75863e-08	NA	NA	NA	7.19753e-07	NA	NA	NA	NA	NA	NA	NA	NA	NA	intergenic	TFF3,TFF2
1	142631056	NA	NA	NA	1.95069e-07	8.59733e-08	6.34795e-07	NA	NA	NA	NA	4.84466e-07	NA	NA	NA	NA	intronic	TFF1
1	142755190	NA	4.82322e-09	1.78402e-07	NA	NA	9.05833e-07	NA	NA	NA	NA	NA	NA	NA	NA	NA	intergenic	UBASH3A,RSPH1
1	142767939	NA	NA	NA	2.91758e-07	5.07307e-07	3.9687e-07	NA	NA	NA	NA	NA	NA	NA	NA	NA	intronic	RSPH1
1	142767950	NA	NA	NA	3.20918e-08	4.67878e-07	1.06649e-07	NA	NA	NA	NA	NA	NA	NA	NA	NA	intronic	RSPH1
1	142767964	NA	9.69138e-07	NA	8.33987e-09	1.54211e-07	3.12452e-08	NA	NA	NA	5.47725e-07	6.07817e-07	NA	NA	NA	6.29798e-07	intronic	RSPH1
1	142767966	NA	5.30083e-07	NA	6.34738e-09	1.33868e-07	2.13248e-08	NA	NA	NA	5.07193e-07	9.92923e-07	NA	NA	NA	7.53708e-07	intronic	RSPH1
1	147655994	NA	NA	NA	NA	NA	NA	NA	NA	NA	NA	NA	NA	NA	6.70207e-08	NA	intergenic	RUNX1,SETD4
1	147789823	NA	NA	NA	NA	NA	NA	NA	NA	NA	NA	NA	NA	NA	7.87119e-07	NA	intergenic	RUNX1,SETD4
1	154953423	5.6437e-07	NA	NA	NA	NA	NA	NA	NA	NA	NA	NA	NA	NA	NA	NA	intergenic	TBC1D5,SATB1
1	155860621	NA	1.24036e-09	5.48639e-08	4.9781e-07	1.65871e-08	9.51302e-09	NA	NA	NA	NA	NA	NA	NA	NA	NA	intergenic	SATB1,KCNH8
1	156065089	NA	3.00537e-07	1.91791e-07	NA	NA	NA	NA	NA	NA	NA	NA	NA	NA	NA	NA	intergenic	SATB1,KCNH8
1	157762473	NA	NA	NA	4.91449e-07	NA	NA	NA	NA	NA	NA	1.76057e-07	NA	NA	NA	NA	intronic	LOC538060
2	4310423	2.47586e-07	NA	NA	NA	NA	NA	NA	NA	NA	NA	NA	NA	NA	NA	NA	intronic	UGGT1
2	4310453	8.64626e-07	NA	NA	NA	NA	NA	NA	NA	NA	NA	NA	NA	NA	NA	NA	intronic	UGGT1
2	4611823	NA	NA	NA	NA	NA	NA	NA	NA	NA	NA	7.21927e-07	NA	NA	NA	NA	intronic	AMMECR1L
2	4664118	NA	NA	NA	NA	NA	NA	NA	NA	NA	NA	3.96393e-07	NA	NA	NA	NA	intergenic	POLR2D,WDR33
2	4831408	NA	NA	NA	NA	NA	NA	NA	NA	NA	NA	NA	NA	NA	5.02843e-08	NA	intergenic	SFT2D3,LIMS2
2	7882380	NA	NA	NA	NA	NA	NA	NA	NA	7.24079e-07	NA	NA	NA	NA	NA	NA	intergenic	DIRC1,GULP1
2	9116975	NA	NA	NA	NA	NA	NA	NA	NA	6.90495e-07	NA	NA	NA	NA	NA	NA	intergenic	CALCRL,ZSWIM2
2	10012826	NA	NA	NA	NA	NA	NA	NA	NA	2.90474e-07	NA	NA	NA	NA	NA	NA	intergenic	ZC3H15,FSIP2
2	11441323	NA	NA	NA	7.31468e-07	NA	NA	NA	NA	NA	NA	NA	NA	NA	NA	NA	intergenic	FSIP2,ZNF804A
2	11541944	NA	NA	NA	NA	NA	NA	NA	NA	NA	NA	8.4211e-07	NA	NA	NA	NA	intergenic	FSIP2,ZNF804A
2	11970286	NA	NA	NA	9.30193e-08	2.47438e-08	4.91196e-07	NA	NA	NA	7.81967e-07	2.52066e-07	NA	NA	NA	NA	intergenic	ZNF804A,TRNAC-GCA
2	11979537	NA	NA	NA	9.43198e-07	2.89185e-07	6.13282e-07	NA	NA	NA	6.06956e-07	1.56435e-07	NA	NA	NA	NA	intergenic	ZNF804A,TRNAC-GCA
2	12054873	NA	NA	NA	NA	3.53423e-07	NA	NA	NA	NA	3.26274e-07	1.90753e-07	NA	NA	NA	3.50968e-07	intergenic	ZNF804A,TRNAC-GCA
2	12075074	NA	NA	NA	NA	NA	NA	NA	NA	NA	8.02837e-07	NA	NA	NA	NA	NA	intergenic	ZNF804A,TRNAC-GCA
2	12121148	NA	2.47332e-07	NA	NA	NA	NA	NA	NA	NA	NA	NA	NA	NA	NA	NA	intergenic	ZNF804A,TRNAC-GCA
2	12195669	NA	NA	NA	NA	6.65133e-07	NA	NA	NA	NA	NA	NA	NA	NA	NA	NA	intergenic	ZNF804A,TRNAC-GCA
2	12195716	NA	NA	NA	NA	6.45927e-07	NA	NA	NA	NA	NA	NA	NA	NA	NA	NA	intergenic	ZNF804A,TRNAC-GCA
2	12196658	NA	NA	NA	NA	5.14223e-07	NA	NA	NA	NA	NA	NA	NA	NA	NA	NA	intergenic	ZNF804A,TRNAC-GCA
2	12196659	NA	NA	NA	NA	5.14223e-07	NA	NA	NA	NA	NA	NA	NA	NA	NA	NA	intergenic	ZNF804A,TRNAC-GCA
2	12196716	NA	1.80171e-08	9.71311e-07	1.46629e-08	6.12412e-09	9.12531e-09	NA	NA	NA	NA	5.6176e-07	NA	NA	NA	4.85257e-07	intergenic	ZNF804A,TRNAC-GCA
2	12196993	NA	NA	NA	NA	NA	NA	NA	NA	NA	8.04382e-07	NA	NA	NA	NA	NA	intergenic	ZNF804A,TRNAC-GCA
2	12197140	NA	7.90103e-07	NA	9.42887e-09	7.85603e-09	2.49239e-08	NA	NA	NA	NA	1.54864e-07	NA	NA	NA	6.86188e-07	intergenic	ZNF804A,TRNAC-GCA
2	12303739	NA	NA	NA	NA	1.82775e-07	NA	NA	NA	NA	NA	1.76433e-07	NA	NA	NA	NA	intergenic	ZNF804A,TRNAC-GCA
2	12345792	NA	NA	NA	NA	NA	NA	NA	NA	NA	NA	NA	NA	NA	6.01778e-08	NA	intergenic	ZNF804A,TRNAC-GCA
2	12420646	NA	NA	NA	NA	4.58095e-07	NA	NA	NA	NA	NA	7.60916e-07	NA	NA	NA	NA	intergenic	ZNF804A,TRNAC-GCA
2	12535489	NA	NA	NA	2.63281e-07	8.80987e-09	5.32459e-07	NA	NA	NA	2.80108e-07	2.61882e-08	NA	NA	NA	NA	intergenic	ZNF804A,TRNAC-GCA
2	12804627	NA	NA	NA	1.34581e-07	2.02887e-07	4.07174e-07	NA	NA	NA	NA	NA	NA	NA	NA	NA	intergenic	ZNF804A,TRNAC-GCA
2	12804629	NA	NA	NA	1.34581e-07	2.02887e-07	4.07174e-07	NA	NA	NA	NA	NA	NA	NA	NA	NA	intergenic	ZNF804A,TRNAC-GCA
2	13864488	NA	NA	NA	3.78646e-07	1.0226e-07	NA	NA	NA	NA	NA	NA	NA	NA	NA	NA	intergenic	DNAJC10,PDE1A
2	14815145	NA	NA	NA	NA	3.26032e-07	NA	NA	NA	NA	NA	2.23022e-07	7.08023e-07	NA	NA	NA	intergenic	SSFA2,NEUROD1
2	15472047	NA	NA	NA	NA	NA	NA	6.42644e-07	NA	NA	NA	NA	NA	NA	NA	NA	intergenic	TRNAC-GCA,UBE2E3
2	15664266	NA	NA	5.19511e-07	2.22086e-08	8.00356e-08	1.75965e-07	NA	NA	NA	NA	NA	NA	NA	NA	NA	intronic	UBE2E3
2	15697518	NA	NA	NA	6.24429e-08	7.35536e-09	2.62276e-07	NA	NA	NA	6.89737e-07	1.30654e-07	NA	NA	NA	8.36602e-07	intronic	UBE2E3
2	16386731	NA	NA	NA	6.40695e-07	9.38376e-09	3.67067e-07	NA	NA	NA	2.56886e-07	NA	NA	NA	NA	NA	intergenic	TRNASTOP-UCA,CWC22
2	16406169	NA	NA	NA	NA	7.33144e-07	NA	NA	NA	NA	NA	NA	NA	NA	NA	NA	intergenic	TRNASTOP-UCA,CWC22
2	16410375	NA	NA	NA	NA	7.30289e-08	NA	NA	NA	NA	7.12315e-07	5.03185e-07	NA	NA	NA	NA	intergenic	TRNASTOP-UCA,CWC22
2	16410692	NA	NA	NA	NA	3.67837e-07	NA	NA	NA	NA	1.82851e-07	2.58146e-07	NA	NA	NA	NA	intergenic	TRNASTOP-UCA,CWC22
2	17654048	NA	NA	NA	3.94115e-09	4.01889e-09	4.91816e-08	NA	NA	NA	3.80248e-07	4.44559e-08	NA	NA	NA	3.53016e-07	intronic	SESTD1
2	17658787	NA	NA	NA	3.01441e-07	NA	NA	NA	NA	NA	NA	NA	NA	NA	NA	NA	intronic	SESTD1
2	17668728	NA	NA	NA	NA	NA	NA	NA	NA	NA	NA	9.76528e-07	NA	NA	NA	NA	intronic	SESTD1
2	17743283	NA	NA	NA	NA	1.76438e-07	NA	NA	NA	NA	6.21231e-07	1.96899e-07	NA	NA	NA	NA	intronic	SESTD1
2	17899937	NA	NA	NA	NA	4.81189e-07	NA	NA	NA	NA	NA	NA	NA	NA	NA	NA	intronic	CCDC141
2	17909630	NA	5.075e-08	2.64566e-07	1.4296e-09	6.37188e-11	3.34775e-10	NA	NA	NA	2.10781e-09	1.28771e-09	NA	NA	NA	1.04398e-08	intronic	CCDC141
2	18390632	NA	NA	NA	NA	NA	NA	NA	NA	NA	NA	7.05028e-07	NA	NA	NA	NA	intronic	PLEKHA3
2	18542069	NA	NA	6.02137e-08	4.07736e-09	8.92136e-07	1.09279e-07	NA	NA	NA	NA	NA	NA	NA	NA	NA	intronic	OSBPL6
2	18542099	NA	NA	1.45364e-08	1.39039e-09	9.11307e-08	2.68405e-08	NA	NA	NA	NA	NA	NA	NA	NA	NA	intronic	OSBPL6
2	18616042	NA	NA	NA	2.83723e-07	2.36296e-09	2.39405e-07	NA	NA	NA	NA	NA	NA	NA	NA	NA	intronic	OSBPL6
2	18617285	NA	NA	NA	NA	NA	NA	NA	NA	NA	NA	9.95228e-07	NA	NA	NA	NA	intronic	OSBPL6
2	18630420	NA	NA	NA	NA	1.05222e-07	NA	NA	NA	NA	NA	1.12259e-07	NA	NA	NA	NA	intronic	OSBPL6
2	18630421	NA	NA	NA	NA	1.05222e-07	NA	NA	NA	NA	NA	1.12259e-07	NA	NA	NA	NA	intronic	OSBPL6
2	18631804	NA	NA	NA	5.11497e-07	3.11709e-07	NA	NA	NA	NA	NA	NA	NA	NA	NA	NA	intronic	OSBPL6
2	18631940	NA	NA	NA	2.88729e-08	1.12447e-08	9.5503e-08	NA	NA	NA	NA	9.75316e-07	NA	NA	NA	NA	intronic	OSBPL6
2	18634679	NA	NA	NA	NA	2.38736e-07	NA	NA	NA	NA	NA	NA	NA	NA	NA	NA	UTR5	OSBPL6
2	18635878	NA	NA	6.7104e-07	2.14662e-09	1.66006e-08	2.31286e-08	NA	NA	NA	8.80105e-07	5.61053e-08	NA	NA	NA	NA	intronic	OSBPL6
2	18649413	NA	NA	1.43596e-07	4.19078e-07	6.11938e-07	NA	NA	NA	NA	NA	NA	NA	NA	NA	NA	intronic	OSBPL6
2	18666756	NA	NA	NA	NA	NA	NA	NA	NA	NA	NA	1.83053e-07	NA	NA	NA	NA	intronic	OSBPL6
2	19070836	NA	NA	NA	1.59496e-07	2.71996e-08	8.97181e-07	NA	NA	NA	NA	4.82874e-07	NA	NA	NA	NA	intronic	PDE11A
2	19147773	NA	NA	NA	3.76578e-08	6.77492e-07	8.52417e-07	NA	NA	NA	NA	NA	NA	NA	NA	NA	intronic	PDE11A
2	19944882	NA	NA	NA	5.82688e-07	5.05589e-07	NA	NA	NA	NA	NA	2.74812e-07	NA	NA	NA	NA	intergenic	HNRNPA3,MTX2
2	20171317	NA	8.60288e-07	NA	NA	NA	NA	NA	NA	NA	NA	NA	NA	NA	NA	NA	intergenic	HNRNPA3,MTX2
2	20171320	NA	NA	NA	6.05162e-08	1.0622e-07	2.54911e-07	NA	NA	NA	NA	3.46253e-07	NA	NA	NA	NA	intergenic	HNRNPA3,MTX2
2	20209091	NA	NA	NA	2.31878e-07	2.51388e-08	3.31422e-07	NA	NA	NA	2.44228e-07	7.68401e-08	NA	NA	NA	NA	intergenic	HNRNPA3,MTX2
2	20229453	NA	NA	NA	NA	6.48479e-07	NA	NA	NA	NA	NA	NA	NA	NA	NA	NA	intergenic	HNRNPA3,MTX2
2	20342282	NA	NA	NA	NA	NA	NA	NA	NA	NA	NA	8.92019e-07	NA	NA	NA	NA	intergenic	HNRNPA3,MTX2
2	20654200	NA	NA	NA	3.07162e-07	7.36089e-08	5.19877e-07	NA	NA	NA	NA	NA	NA	NA	NA	NA	intergenic	MTX2,HOXD1
2	21095956	NA	NA	NA	1.0225e-07	2.37126e-08	1.00159e-07	NA	NA	NA	1.13533e-08	1.68825e-08	NA	NA	NA	1.41275e-08	intergenic	LNPK,ATP5MC3
2	22079219	NA	NA	NA	8.93401e-07	2.56003e-07	NA	NA	NA	NA	1.64529e-07	9.6141e-08	NA	NA	NA	7.2734e-07	intergenic	CHN1,CHRNA1
2	22208702	NA	NA	NA	NA	5.07836e-07	NA	NA	NA	NA	NA	NA	NA	NA	NA	NA	intronic	WIPF1
2	22502120	NA	NA	NA	NA	3.10703e-07	NA	NA	NA	NA	5.19106e-07	5.63764e-07	NA	NA	NA	NA	intergenic	SP9,OLA1
2	23032245	NA	NA	NA	NA	2.31555e-07	NA	NA	NA	NA	NA	3.60239e-07	NA	NA	NA	NA	intergenic	TRNAA-UGC,LOC107132247
2	23055860	NA	NA	NA	NA	1.26608e-07	NA	NA	NA	6.99374e-07	1.03631e-07	6.65693e-07	NA	NA	NA	2.83066e-07	intergenic	TRNAA-UGC,LOC107132247
2	23085501	NA	NA	NA	1.85975e-07	1.61438e-08	4.36446e-07	NA	NA	NA	5.0346e-09	2.13399e-09	NA	NA	NA	6.57914e-08	intergenic	TRNAA-UGC,LOC107132247
2	23085529	NA	NA	NA	NA	2.74866e-07	NA	NA	NA	NA	NA	3.04838e-07	NA	NA	NA	NA	intergenic	TRNAA-UGC,LOC107132247
2	23087582	NA	NA	NA	NA	NA	NA	NA	NA	NA	NA	7.01777e-07	NA	NA	NA	NA	intergenic	TRNAA-UGC,LOC107132247
2	23363126	NA	NA	NA	NA	4.49243e-07	NA	NA	NA	NA	NA	NA	NA	NA	NA	NA	intergenic	CDCA7,TRNAE-CUC
2	23389805	NA	NA	NA	NA	NA	NA	NA	NA	NA	9.95093e-07	6.18706e-07	NA	NA	NA	NA	intergenic	TRNAE-CUC,MAP3K20
2	23449435	NA	NA	NA	NA	5.25748e-07	NA	NA	NA	NA	4.0918e-07	6.07996e-07	NA	NA	NA	NA	intronic	MAP3K20
2	23456331	NA	NA	NA	NA	1.3691e-07	NA	NA	NA	NA	7.60212e-07	3.4169e-07	NA	NA	NA	NA	intronic	MAP3K20
2	23485658	NA	NA	NA	NA	6.11502e-08	NA	NA	NA	NA	NA	9.55363e-07	NA	NA	NA	NA	intronic	MAP3K20
2	23556874	NA	NA	NA	NA	8.98191e-07	NA	NA	NA	NA	NA	NA	NA	NA	NA	NA	intronic	MAP3K20
2	24278145	NA	NA	NA	NA	4.18343e-07	NA	NA	NA	NA	NA	5.56607e-07	NA	NA	NA	NA	intergenic	ITGA6,TRNAW-CCA
2	28538137	NA	NA	NA	NA	6.40093e-07	NA	NA	NA	NA	NA	NA	NA	NA	NA	NA	intronic	B3GALT1
2	28898613	NA	NA	NA	NA	1.81092e-07	NA	NA	NA	NA	NA	NA	NA	NA	NA	NA	intronic	B3GALT1
2	32393001	NA	NA	NA	NA	7.70238e-07	NA	NA	NA	NA	NA	7.82807e-07	NA	NA	NA	NA	intergenic	GRB14,FIGN
2	42045934	NA	NA	NA	NA	7.92306e-07	NA	NA	NA	NA	NA	NA	NA	NA	NA	NA	intronic	GALNT13
2	42638021	NA	NA	NA	5.34716e-07	7.76994e-08	NA	NA	NA	NA	NA	NA	NA	NA	NA	NA	intergenic	GALNT13,RPRM
2	43806893	NA	NA	NA	1.4772e-07	1.51356e-07	3.19495e-07	NA	NA	NA	NA	9.08707e-07	NA	NA	NA	NA	intronic	FMNL2
2	44120794	NA	NA	NA	NA	NA	NA	NA	NA	NA	NA	NA	NA	NA	7.91309e-07	NA	intronic	CACNB4
2	44878082	NA	NA	NA	NA	NA	NA	NA	NA	NA	NA	2.60899e-07	NA	NA	NA	NA	intergenic	RBM43,RND3
2	44917592	NA	NA	NA	NA	5.93772e-07	NA	NA	NA	NA	NA	2.40989e-07	NA	NA	NA	NA	intergenic	RBM43,RND3
2	45943967	NA	NA	NA	NA	NA	NA	NA	NA	NA	NA	NA	NA	NA	8.00997e-07	NA	intergenic	RND3,MMADHC
2	48702398	3.20745e-07	NA	NA	NA	NA	NA	NA	NA	NA	NA	NA	NA	NA	NA	NA	intergenic	ACVR2A,LOC786829
2	59566349	NA	9.26369e-08	NA	NA	NA	NA	NA	NA	NA	NA	NA	NA	NA	NA	NA	intronic	THSD7B
2	65418809	NA	NA	NA	1.02697e-08	NA	9.84901e-07	NA	NA	NA	NA	NA	NA	NA	NA	NA	intergenic	SLC35F5,ACTR3
2	69000047	NA	NA	NA	7.51673e-07	NA	NA	NA	NA	NA	NA	NA	NA	NA	NA	NA	intergenic	DPP10,DDX18
2	69000075	NA	NA	NA	5.97535e-07	NA	NA	NA	NA	NA	NA	NA	NA	NA	NA	NA	intergenic	DPP10,DDX18
2	70975423	7.05476e-09	NA	NA	NA	NA	NA	NA	NA	NA	NA	NA	NA	NA	NA	NA	intergenic	C1QL2,STEAP3
2	83058370	NA	NA	NA	NA	NA	NA	NA	NA	NA	NA	NA	NA	NA	6.1613e-07	NA	intergenic	NONE,SLC39A10
2	84501527	NA	NA	NA	NA	NA	NA	NA	NA	NA	NA	NA	NA	NA	2.61769e-07	NA	intronic	DNAH7
2	86808276	NA	NA	NA	NA	NA	NA	NA	NA	NA	NA	NA	NA	NA	NA	8.23e-07	intergenic	PLCL1,SATB2
2	94048970	NA	NA	NA	NA	NA	NA	NA	NA	NA	NA	NA	NA	3.10181e-08	NA	NA	intronic	NRP2
2	97871708	NA	7.91476e-07	1.43929e-07	NA	NA	NA	NA	NA	NA	NA	NA	NA	NA	NA	NA	intronic	KANSL1L
2	103350710	NA	NA	NA	NA	NA	NA	NA	NA	5.91725e-07	NA	NA	NA	NA	NA	NA	exonic	ATIC
2	103728129	NA	NA	1.79486e-07	2.46249e-07	NA	4.36734e-07	NA	NA	NA	NA	NA	NA	NA	NA	NA	intergenic	FN1,MREG
2	103827275	NA	NA	NA	NA	NA	NA	NA	NA	7.67315e-07	NA	NA	NA	NA	NA	NA	intergenic	FN1,MREG
2	107394607	NA	6.23115e-07	3.82013e-07	NA	NA	NA	NA	NA	NA	NA	NA	NA	NA	NA	NA	intronic	SPEG
2	111210280	NA	NA	NA	NA	NA	NA	NA	NA	NA	NA	NA	NA	NA	3.4339e-07	NA	intergenic	ACSL3,KCNE4
2	121065674	NA	7.74906e-07	NA	3.79427e-08	NA	1.34708e-07	NA	NA	NA	NA	7.80836e-07	NA	NA	NA	NA	intronic	ZBTB8A
2	132830339	NA	NA	NA	NA	4.1574e-07	7.84875e-07	NA	NA	NA	5.54943e-07	7.38333e-08	NA	NA	NA	7.42836e-07	intronic	OTUD3
2	132964317	2.38631e-07	NA	NA	NA	NA	NA	NA	NA	NA	NA	NA	NA	NA	NA	NA	intronic	TMCO4
2	133116217	NA	NA	NA	6.60172e-07	NA	NA	NA	NA	NA	NA	NA	NA	NA	NA	NA	intergenic	MINOS1,CAPZB
3	3840124	NA	1.55159e-07	NA	9.21613e-07	NA	5.13763e-07	NA	NA	NA	NA	NA	NA	NA	NA	NA	intergenic	LMX1A,PBX1
3	3841255	NA	7.12601e-07	NA	8.09829e-07	NA	9.63195e-07	NA	NA	NA	NA	NA	NA	NA	NA	NA	intergenic	LMX1A,PBX1
3	3842596	NA	2.99221e-07	NA	NA	NA	NA	NA	NA	NA	NA	NA	NA	NA	NA	NA	intergenic	LMX1A,PBX1
3	11273330	NA	NA	NA	1.93894e-07	NA	NA	NA	NA	NA	NA	NA	NA	NA	NA	NA	intergenic	OR6Y1,LOC616705
3	11858009	NA	NA	NA	NA	5.10829e-07	NA	NA	NA	NA	NA	NA	NA	NA	NA	NA	intergenic	LOC781726,CD1A
3	13373427	NA	3.1139e-07	1.07215e-07	NA	NA	NA	NA	NA	NA	NA	NA	NA	NA	NA	NA	intronic	LOC101906176
3	25491233	NA	NA	NA	6.60764e-07	NA	NA	NA	NA	NA	NA	NA	NA	NA	NA	NA	intergenic	GDAP2,TENT5C
3	25514592	NA	NA	NA	6.38585e-07	NA	8.5088e-07	NA	NA	NA	NA	NA	NA	NA	NA	NA	intergenic	GDAP2,TENT5C
3	25517057	NA	5.17487e-07	NA	NA	NA	NA	NA	NA	NA	NA	NA	NA	NA	NA	NA	intergenic	GDAP2,TENT5C
3	28139664	NA	3.31278e-07	1.58478e-07	2.0722e-07	NA	1.27574e-07	NA	NA	NA	NA	NA	NA	NA	NA	NA	intergenic	NGF,TSPAN2
3	36119273	NA	NA	NA	NA	6.56527e-07	NA	NA	NA	NA	NA	NA	NA	NA	NA	NA	intronic	NTNG1
3	39585629	NA	NA	NA	7.46301e-07	9.88213e-08	3.41209e-07	NA	NA	NA	NA	9.49842e-07	NA	NA	NA	NA	intergenic	NONE,LOC539383
3	41061947	NA	NA	3.35299e-07	NA	NA	NA	NA	NA	NA	NA	NA	NA	NA	NA	NA	intergenic	COL11A1,OLFM3
3	41679167	NA	NA	NA	NA	NA	NA	NA	NA	NA	NA	NA	NA	8.24106e-07	NA	NA	intergenic	OLFM3,S1PR1
3	41679300	NA	NA	NA	NA	NA	NA	NA	NA	NA	NA	NA	NA	3.09036e-07	NA	NA	intergenic	OLFM3,S1PR1
3	54420492	1.35641e-07	NA	NA	NA	NA	NA	NA	NA	NA	NA	NA	NA	NA	NA	NA	intronic	GBP4,LOC781710
3	54467011	NA	NA	2.18342e-07	NA	NA	NA	NA	NA	NA	NA	NA	NA	NA	NA	NA	intronic	GBP4
3	54882806	NA	NA	NA	5.03812e-07	NA	NA	NA	NA	NA	NA	NA	NA	NA	NA	NA	intronic	LOC511531
3	61003392	NA	NA	NA	NA	NA	NA	NA	NA	NA	NA	NA	NA	NA	1.86878e-07	NA	intergenic	TTLL7,ADGRL2
3	61784296	NA	NA	NA	NA	NA	NA	NA	NA	NA	NA	NA	NA	NA	5.91979e-07	NA	intergenic	TTLL7,ADGRL2
3	63583457	NA	NA	NA	2.35907e-07	NA	NA	NA	NA	NA	NA	NA	NA	NA	NA	NA	intergenic	TRNAC-ACA,NONE
3	64269685	NA	NA	NA	NA	NA	NA	NA	NA	NA	NA	NA	NA	NA	4.94206e-07	NA	intergenic	TRNAC-ACA,ADGRL4
3	64278663	NA	NA	NA	NA	NA	NA	NA	NA	NA	NA	NA	NA	NA	5.69331e-09	NA	intergenic	TRNAC-ACA,ADGRL4
3	65814665	NA	NA	NA	NA	NA	NA	NA	NA	NA	NA	6.69971e-07	NA	NA	NA	NA	intergenic	ADGRL4,IFI44
3	65815818	NA	NA	NA	NA	4.17565e-07	NA	NA	NA	NA	1.25461e-07	6.16303e-08	NA	NA	NA	1.89048e-07	intergenic	ADGRL4,IFI44
3	65819790	NA	NA	NA	NA	NA	NA	NA	NA	NA	NA	4.26253e-07	NA	NA	NA	NA	intergenic	ADGRL4,IFI44
3	65819807	NA	NA	NA	NA	NA	NA	NA	NA	NA	NA	1.70827e-07	NA	NA	NA	NA	intergenic	ADGRL4,IFI44
3	65820454	NA	NA	NA	NA	NA	NA	NA	NA	NA	NA	8.02382e-07	NA	NA	NA	NA	intergenic	ADGRL4,IFI44
3	67195846	NA	NA	NA	5.96398e-07	1.87394e-08	7.1679e-07	NA	NA	NA	3.29662e-07	5.07827e-08	NA	NA	NA	NA	intronic	AK5
3	67195930	NA	NA	NA	NA	5.90048e-07	NA	NA	NA	NA	6.17755e-07	1.09279e-07	NA	NA	NA	NA	intronic	AK5
3	67365443	NA	NA	NA	4.19082e-07	2.91789e-07	NA	NA	NA	NA	NA	NA	NA	NA	NA	NA	intergenic	AK5,PIGK
3	67430658	2.33144e-07	NA	NA	NA	NA	NA	NA	NA	NA	NA	NA	NA	NA	NA	NA	intronic	PIGK
3	67481789	NA	NA	NA	NA	NA	NA	NA	NA	NA	NA	6.715e-07	NA	NA	NA	NA	intronic	PIGK
3	67482441	NA	NA	NA	5.28303e-07	NA	NA	NA	NA	NA	NA	NA	NA	NA	NA	NA	intronic	PIGK
3	67486549	NA	NA	NA	1.48867e-07	2.44229e-07	8.86041e-07	NA	NA	NA	3.5103e-07	1.91353e-07	NA	NA	NA	NA	intronic	PIGK
3	67486628	NA	NA	NA	1.04662e-08	3.25694e-09	2.26681e-08	NA	NA	NA	9.76495e-09	9.52995e-09	NA	NA	NA	1.42282e-07	intronic	PIGK
3	67486641	NA	NA	NA	1.99144e-09	5.20511e-10	4.58454e-09	NA	NA	NA	1.40637e-09	1.28447e-09	NA	NA	NA	3.19519e-08	intronic	PIGK
3	67487600	NA	NA	NA	2.4944e-07	9.52453e-09	3.07709e-07	NA	NA	NA	5.07982e-07	1.27628e-07	NA	NA	NA	NA	intronic	PIGK
3	67510054	4.87742e-07	NA	NA	NA	NA	NA	NA	NA	NA	NA	NA	NA	NA	NA	NA	intronic	PIGK
3	67511399	NA	NA	NA	NA	NA	NA	NA	NA	NA	NA	6.7199e-07	NA	NA	NA	NA	intronic	PIGK
3	67524524	1.05844e-07	NA	NA	NA	NA	NA	NA	NA	NA	NA	NA	NA	NA	NA	NA	intronic	PIGK
3	67527976	NA	NA	NA	7.48453e-07	9.39361e-08	NA	NA	NA	NA	NA	NA	NA	NA	NA	NA	intronic	PIGK
3	67530722	NA	NA	NA	6.28358e-08	2.56679e-08	1.92103e-07	NA	NA	NA	1.98408e-07	3.27244e-08	NA	NA	NA	1.28626e-07	intronic	PIGK
3	67539808	9.44707e-07	NA	NA	NA	NA	NA	NA	NA	NA	NA	NA	NA	NA	NA	NA	intronic	PIGK
3	67787334	NA	NA	NA	NA	NA	NA	NA	NA	NA	NA	NA	NA	NA	7.79881e-07	NA	intronic	ST6GALNAC5
3	68094779	NA	NA	NA	8.74002e-07	NA	NA	NA	NA	NA	NA	NA	NA	NA	NA	NA	intergenic	ST6GALNAC5,ST6GALNAC3
3	68787246	NA	NA	NA	NA	1.91141e-07	NA	NA	NA	NA	8.17283e-07	1.95329e-07	NA	NA	NA	NA	intergenic	ST6GALNAC3,TRNAC-GCA
3	70142324	NA	5.13897e-07	NA	NA	NA	NA	NA	NA	NA	NA	NA	NA	NA	NA	NA	intronic	ERICH3
3	70384852	NA	NA	NA	8.34064e-07	NA	NA	NA	NA	NA	NA	NA	NA	NA	NA	NA	intronic	TNNI3K
3	75465391	NA	NA	NA	NA	8.3018e-07	NA	NA	NA	NA	NA	NA	NA	NA	NA	NA	intronic	LRRC7
3	77001878	NA	2.88679e-07	NA	NA	NA	NA	NA	NA	NA	NA	NA	NA	NA	NA	NA	intergenic	RPE65,WLS
3	78411272	NA	3.92679e-07	NA	NA	NA	NA	NA	NA	NA	NA	NA	NA	NA	NA	NA	intronic	WDR78
3	78417861	NA	4.67856e-07	NA	NA	NA	NA	NA	NA	NA	NA	NA	NA	NA	NA	NA	intronic	WDR78
3	81466952	NA	8.45433e-07	NA	NA	NA	NA	NA	NA	NA	NA	NA	NA	NA	NA	NA	intronic	ROR1
3	81865000	NA	NA	NA	1.61504e-07	NA	NA	NA	NA	NA	NA	NA	NA	NA	NA	NA	intergenic	ROR1,PGM1
3	84808115	NA	NA	NA	NA	NA	NA	NA	NA	NA	NA	NA	NA	3.95942e-07	NA	NA	intergenic	NFIA,C3H1orf87
3	84808217	NA	NA	NA	NA	NA	NA	NA	NA	NA	NA	NA	NA	3.67282e-07	NA	NA	intergenic	NFIA,C3H1orf87
3	84878173	NA	NA	NA	NA	NA	NA	NA	NA	NA	NA	NA	NA	7.86162e-07	NA	NA	intergenic	NFIA,C3H1orf87
3	85789114	NA	NA	1.9086e-07	NA	NA	NA	NA	NA	NA	NA	NA	NA	NA	NA	NA	intergenic	C3H1orf87,LOC530929
3	92574392	NA	NA	NA	NA	NA	NA	9.0983e-07	NA	NA	NA	NA	NA	NA	NA	NA	intronic	GLIS1
3	105612257	NA	NA	NA	NA	NA	NA	NA	NA	NA	NA	NA	NA	NA	1.34733e-07	NA	intergenic	LOC511494,ZNF684
3	114993157	NA	NA	NA	NA	NA	NA	NA	NA	NA	NA	NA	9.70304e-08	NA	NA	NA	intergenic	SH3BP4,AGAP1
3	115000274	NA	NA	NA	NA	2.92905e-07	NA	NA	NA	NA	5.94667e-08	2.18268e-07	2.54515e-07	NA	NA	6.02982e-08	intergenic	SH3BP4,AGAP1
3	117920408	NA	NA	NA	NA	NA	NA	NA	NA	NA	NA	NA	NA	3.66271e-07	NA	NA	intergenic	ASB1,TWIST2
3	120685865	NA	6.3224e-08	NA	NA	NA	NA	NA	NA	NA	NA	NA	NA	NA	NA	NA	intronic	THAP4
3	120711938	NA	4.42055e-07	NA	NA	NA	NA	NA	NA	NA	NA	NA	NA	NA	NA	NA	intergenic	THAP4,ATG4B
3	120747721	NA	7.1884e-07	NA	NA	NA	NA	NA	NA	NA	NA	NA	NA	NA	NA	NA	intronic	ING5
3	120766812	NA	3.66333e-08	NA	NA	NA	NA	NA	NA	NA	NA	NA	NA	NA	NA	NA	intronic	D2HGDH
4	5351203	NA	NA	4.32509e-07	NA	NA	NA	NA	NA	NA	NA	NA	NA	NA	NA	NA	intronic	DDC
4	6002246	NA	NA	NA	NA	NA	NA	NA	NA	NA	NA	NA	NA	NA	5.97236e-07	NA	intronic	VWC2
4	6002259	NA	NA	NA	NA	NA	NA	NA	NA	NA	NA	NA	NA	NA	2.82508e-07	NA	intronic	VWC2
4	9885741	NA	NA	NA	NA	NA	NA	NA	NA	NA	NA	NA	NA	NA	4.2188e-07	NA	intronic	LOC524650
4	10543998	4.69927e-07	NA	NA	NA	NA	NA	NA	NA	NA	NA	NA	NA	NA	NA	NA	intronic	HEPACAM2
4	10782510	1.61287e-07	NA	NA	NA	NA	NA	NA	NA	NA	NA	NA	NA	NA	NA	NA	downstream	CALCR
4	15315413	NA	NA	NA	NA	3.51724e-07	NA	NA	NA	NA	NA	NA	NA	NA	NA	NA	intronic	C1GALT1
4	17279590	NA	NA	NA	NA	1.35779e-07	NA	NA	NA	NA	NA	NA	NA	NA	NA	NA	intergenic	TRNAC-GCA,NDUFA4
4	20856139	2.9479e-07	NA	NA	NA	NA	NA	NA	NA	NA	NA	NA	NA	NA	NA	NA	intergenic	ARL4A,ETV1
4	20989771	NA	NA	NA	NA	NA	NA	NA	NA	NA	NA	NA	NA	NA	1.54037e-08	NA	intergenic	ARL4A,ETV1
4	20995449	NA	NA	NA	NA	5.17245e-07	NA	NA	NA	NA	NA	NA	NA	NA	NA	NA	intergenic	ARL4A,ETV1
4	29179405	NA	NA	NA	NA	NA	NA	NA	NA	NA	NA	NA	NA	NA	4.31619e-07	NA	intergenic	ITGB8,ABCB5
4	33837860	NA	NA	NA	NA	NA	NA	NA	NA	NA	NA	NA	3.35975e-07	NA	NA	NA	intronic	GRM3
4	51342083	NA	8.59702e-07	NA	NA	NA	NA	NA	NA	NA	NA	NA	NA	NA	NA	NA	intronic	ST7
4	52084870	NA	6.85238e-08	NA	NA	NA	NA	NA	NA	NA	NA	NA	NA	NA	NA	NA	intergenic	CAV2,TES
4	52808876	NA	2.37496e-07	NA	NA	NA	NA	NA	NA	NA	NA	NA	NA	NA	NA	NA	intergenic	TFEC,MDFIC
4	54683162	NA	NA	NA	NA	NA	NA	NA	NA	NA	NA	NA	NA	NA	4.2303e-07	NA	intergenic	PPP1R3A,GPR85
4	55430147	NA	NA	NA	NA	NA	NA	NA	NA	NA	NA	NA	1.10822e-07	NA	NA	NA	intergenic	GPR85,BMT2
4	55433715	NA	NA	NA	NA	NA	NA	NA	NA	NA	NA	NA	9.9579e-07	NA	NA	NA	intergenic	GPR85,BMT2
4	55554275	NA	NA	NA	NA	NA	NA	NA	NA	NA	NA	8.17569e-07	NA	NA	NA	NA	intergenic	BMT2,TMEM168
4	56358518	NA	NA	NA	NA	NA	NA	NA	NA	NA	7.26163e-07	NA	4.73758e-07	NA	NA	4.10727e-07	intronic	DOCK4
4	56497827	NA	7.78264e-09	NA	7.90763e-08	3.20207e-07	3.76017e-08	NA	NA	NA	7.58665e-07	2.55761e-07	NA	NA	NA	3.814e-07	intronic	DOCK4
4	56708397	NA	NA	NA	2.09236e-08	1.65072e-07	8.73251e-08	NA	NA	NA	NA	9.98722e-07	NA	NA	NA	NA	intergenic	DOCK4,IMMP2L
4	57364119	2.08883e-10	NA	NA	NA	NA	NA	NA	NA	NA	NA	NA	NA	NA	NA	NA	intronic	IMMP2L
4	57364163	1.9004e-09	NA	NA	NA	NA	NA	NA	NA	NA	NA	NA	NA	NA	NA	NA	intronic	IMMP2L
4	61004773	NA	7.01238e-07	NA	NA	NA	NA	NA	NA	NA	NA	NA	NA	NA	NA	NA	intronic	EEPD1
4	61440435	NA	6.72458e-07	NA	NA	NA	NA	NA	NA	NA	NA	NA	NA	NA	NA	NA	intergenic	HERPUD2,LOC780968
4	61556848	NA	6.67115e-08	1.75662e-08	1.0273e-07	NA	6.83199e-08	NA	NA	NA	NA	NA	NA	NA	NA	7.16467e-07	intergenic	HERPUD2,LOC780968
4	61988087	NA	NA	NA	NA	NA	NA	NA	NA	NA	NA	NA	6.39353e-07	NA	NA	NA	intronic	DPY19L1
4	63902117	NA	3.27573e-07	NA	NA	NA	NA	NA	NA	NA	NA	NA	NA	NA	NA	NA	intergenic	FKBP9,KBTBD2
4	70618513	NA	NA	6.80217e-07	NA	NA	NA	NA	NA	NA	NA	NA	NA	NA	NA	NA	intergenic	MIR148A,NPVF
4	73374948	NA	1.08149e-08	1.48043e-07	4.06087e-07	NA	1.23508e-07	NA	NA	NA	NA	NA	NA	NA	NA	NA	intronic	ZNF804B
4	73380134	NA	3.83572e-07	2.82174e-07	NA	NA	NA	NA	NA	NA	NA	NA	NA	NA	NA	NA	intronic	ZNF804B
4	73411283	NA	NA	NA	9.26085e-07	NA	NA	NA	NA	NA	NA	NA	NA	NA	NA	NA	intronic	ZNF804B
4	74647715	NA	NA	NA	NA	NA	NA	NA	NA	NA	NA	9.95412e-07	NA	NA	NA	NA	intergenic	HUS1,TNS3
4	74737871	NA	NA	NA	NA	NA	NA	NA	5.15063e-07	NA	NA	NA	NA	NA	NA	NA	intergenic	HUS1,TNS3
4	74739541	NA	NA	NA	NA	NA	NA	NA	4.83625e-07	NA	NA	NA	NA	NA	NA	NA	intergenic	HUS1,TNS3
4	74774634	NA	NA	NA	NA	NA	NA	NA	NA	NA	NA	NA	1.73556e-07	NA	NA	NA	upstream	TNS3
4	74775609	NA	NA	NA	NA	NA	NA	NA	NA	NA	NA	NA	3.67803e-07	NA	NA	NA	intronic	TNS3
4	75873368	NA	NA	NA	NA	NA	NA	NA	NA	NA	NA	NA	NA	NA	2.27409e-07	NA	intergenic	TRNAR-ACG,MIR2420
4	75895448	NA	NA	NA	NA	NA	NA	NA	NA	NA	NA	NA	NA	NA	9.05706e-09	NA	intergenic	TRNAR-ACG,MIR2420
4	75906969	NA	NA	NA	NA	NA	NA	NA	NA	NA	NA	NA	NA	NA	8.26606e-07	NA	intergenic	TRNAR-ACG,MIR2420
4	75911199	NA	NA	NA	NA	NA	NA	NA	NA	NA	NA	NA	NA	NA	6.91295e-08	NA	intergenic	TRNAR-ACG,MIR2420
4	75986195	NA	NA	NA	NA	NA	NA	NA	NA	NA	NA	NA	NA	NA	9.72425e-07	NA	intergenic	TRNAR-ACG,MIR2420
4	76013398	NA	NA	NA	NA	NA	NA	NA	NA	NA	NA	NA	NA	NA	5.13463e-07	NA	intergenic	TRNAR-ACG,MIR2420
4	76310409	NA	NA	NA	NA	NA	NA	NA	NA	NA	NA	NA	NA	NA	4.57672e-07	NA	intergenic	ADCY1,RAMP3
4	76315767	NA	NA	NA	NA	NA	NA	NA	NA	NA	NA	NA	NA	NA	2.55117e-08	NA	intergenic	ADCY1,RAMP3
4	76519947	NA	NA	NA	NA	NA	NA	NA	NA	NA	NA	NA	9.46519e-07	NA	NA	NA	intergenic	RAMP3,TBRG4
4	76805629	NA	NA	NA	NA	NA	NA	NA	8.76481e-07	NA	NA	NA	3.61806e-08	NA	NA	NA	intronic	OGDH
4	79925758	NA	NA	NA	NA	NA	NA	NA	NA	NA	NA	NA	NA	NA	9.54457e-08	NA	intergenic	INHBA,SUGCT
4	82908015	NA	NA	NA	NA	NA	NA	NA	NA	NA	NA	NA	NA	NA	3.73478e-07	NA	intergenic	LSM8,LOC112446347
4	82909010	NA	NA	NA	NA	NA	NA	NA	NA	NA	NA	NA	NA	NA	7.4486e-08	NA	intergenic	LSM8,LOC112446347
4	82981899	NA	NA	NA	NA	NA	NA	NA	NA	NA	NA	NA	2.43646e-07	NA	NA	NA	intergenic	LSM8,LOC112446347
4	82988669	NA	NA	NA	NA	NA	NA	NA	NA	NA	NA	NA	7.99189e-07	NA	NA	NA	intergenic	LSM8,LOC112446347
4	84462433	NA	NA	NA	NA	NA	NA	NA	NA	NA	NA	NA	3.80054e-07	NA	NA	NA	intergenic	LSM8,LOC112446347
4	96274803	NA	NA	5.31766e-08	1.15172e-07	NA	4.43844e-07	NA	NA	NA	NA	NA	NA	NA	NA	NA	intergenic	PLXNA4,CHCHD3
4	105752986	1.28584e-07	NA	NA	NA	NA	NA	NA	NA	NA	NA	NA	NA	NA	NA	NA	intronic	LOC100300510
4	108884833	5.59424e-07	NA	NA	NA	NA	NA	NA	NA	NA	NA	NA	NA	NA	NA	NA	intergenic	TPK1,LOC112446342
5	1724619	NA	NA	1.36759e-07	NA	NA	NA	NA	NA	NA	NA	NA	NA	NA	NA	NA	intergenic	TPH2,LOC112446640
5	3292858	NA	NA	1.84076e-07	1.57555e-07	NA	8.67505e-07	NA	NA	NA	NA	NA	NA	NA	NA	NA	intergenic	TRHDE,ATXN7L3B
5	7766765	NA	NA	NA	NA	NA	NA	NA	NA	NA	NA	NA	NA	7.7845e-07	NA	NA	intergenic	NAV3,LOC101907549
5	7766770	NA	NA	NA	NA	NA	NA	NA	NA	NA	NA	NA	NA	7.7845e-07	NA	NA	intergenic	NAV3,LOC101907549
5	8959359	NA	2.48233e-07	1.69162e-08	3.75684e-09	1.04422e-07	1.18415e-08	NA	NA	NA	4.0527e-07	8.07097e-07	NA	NA	NA	2.97373e-07	intronic	SYT1
5	9546098	NA	6.63251e-07	NA	NA	NA	NA	NA	NA	NA	NA	NA	NA	NA	NA	NA	intergenic	PPP1R12A,OTOGL
5	9546106	NA	6.63251e-07	NA	NA	NA	NA	NA	NA	NA	NA	NA	NA	NA	NA	NA	intergenic	PPP1R12A,OTOGL
5	15710293	NA	NA	8.34067e-07	NA	NA	NA	NA	NA	NA	NA	NA	NA	NA	NA	NA	intronic	MGAT4C
5	16000512	NA	NA	NA	NA	NA	NA	NA	NA	NA	NA	NA	7.73147e-08	NA	NA	NA	intergenic	MGAT4C,LOC112446836
5	17148395	NA	NA	2.62371e-07	2.64813e-07	NA	6.30417e-07	NA	5.84827e-07	NA	4.26047e-07	1.3251e-07	8.8392e-07	NA	NA	4.58063e-08	intergenic	MGAT4C,LOC112446836
5	17148412	NA	NA	NA	9.63915e-07	NA	NA	NA	8.46893e-07	NA	9.8981e-07	2.72079e-07	5.65233e-07	NA	NA	8.69143e-08	intergenic	MGAT4C,LOC112446836
5	18408475	NA	7.11641e-07	NA	NA	NA	NA	NA	NA	NA	NA	NA	NA	NA	NA	NA	intergenic	KITLG,TRNAG-CCC
5	26682415	NA	9.66541e-07	NA	NA	NA	NA	NA	NA	NA	NA	NA	NA	NA	NA	NA	intergenic	SP1,SP7
5	38737361	NA	6.51659e-07	NA	NA	NA	NA	NA	NA	NA	NA	NA	NA	NA	NA	NA	intergenic	GXYLT1,PDZRN4
5	41919091	NA	3.41221e-07	1.406e-07	1.9031e-07	NA	2.23746e-07	NA	NA	NA	NA	NA	NA	NA	NA	NA	downstream	KIF21A
5	45245511	NA	1.92535e-08	5.19941e-07	NA	NA	NA	NA	NA	NA	NA	NA	NA	NA	NA	NA	intergenic	RAP1B,MDM1
5	50385063	NA	NA	NA	NA	NA	NA	NA	NA	7.67805e-07	NA	NA	NA	NA	NA	NA	intergenic	AVPR1A,PPM1H
5	61985725	9.16327e-07	NA	NA	NA	NA	NA	NA	NA	NA	NA	NA	NA	NA	NA	NA	intergenic	MIR135A-2,TRNAD-GUC
5	69130271	NA	NA	NA	NA	3.9105e-07	NA	NA	NA	NA	NA	NA	NA	NA	NA	NA	intergenic	C5H12orf75,NUAK1
5	75589009	NA	NA	NA	NA	6.76181e-07	NA	NA	NA	NA	NA	NA	NA	NA	NA	NA	intronic	LOC510185
5	75589032	NA	NA	NA	1.99483e-07	7.87613e-08	9.01275e-08	NA	NA	NA	NA	8.78083e-07	NA	NA	NA	NA	intronic	LOC510185
5	78852575	NA	NA	4.17703e-07	NA	NA	NA	NA	NA	NA	NA	NA	NA	NA	NA	NA	intergenic	CAPRIN2,IPO8
5	78958206	NA	NA	9.08614e-07	NA	NA	NA	NA	NA	NA	NA	NA	NA	NA	NA	NA	intergenic	IPO8,TMTC1
5	78976619	NA	9.81404e-07	NA	NA	NA	NA	NA	NA	NA	NA	NA	NA	NA	NA	NA	intergenic	IPO8,TMTC1
5	79505629	NA	NA	1.29676e-08	NA	NA	NA	NA	NA	NA	NA	NA	NA	NA	NA	NA	intergenic	IPO8,TMTC1
5	81030376	6.16669e-07	NA	NA	NA	NA	NA	NA	NA	NA	NA	NA	NA	NA	NA	NA	intergenic	FAR2,CCDC91
5	81061819	8.80517e-07	NA	NA	NA	NA	NA	NA	NA	NA	NA	NA	NA	NA	NA	NA	intergenic	FAR2,CCDC91
5	81529610	6.57242e-08	NA	NA	NA	NA	NA	NA	NA	NA	NA	NA	NA	NA	NA	NA	intronic	CCDC91
5	85076324	NA	NA	NA	NA	NA	NA	NA	NA	NA	NA	NA	NA	NA	5.79469e-07	NA	intronic	BCAT1
5	106481807	NA	NA	NA	NA	6.24368e-07	NA	NA	NA	NA	4.91318e-07	1.98316e-07	NA	NA	NA	NA	intergenic	PRMT8,TSPAN11
5	107036220	6.63456e-07	NA	NA	NA	NA	NA	NA	NA	NA	NA	NA	NA	NA	NA	NA	intergenic	WASHC1,IQSEC3
5	107498866	3.87947e-07	NA	NA	NA	NA	NA	NA	NA	NA	NA	NA	NA	NA	NA	NA	intronic	NINJ2
5	111950915	NA	NA	NA	NA	NA	NA	NA	NA	NA	NA	NA	NA	NA	2.35496e-07	NA	intronic	MKL1
5	111951427	NA	NA	NA	NA	NA	NA	NA	NA	NA	NA	NA	NA	NA	7.34331e-08	NA	upstream	MKL1
5	113618606	NA	NA	NA	NA	NA	NA	NA	NA	NA	NA	NA	NA	NA	1.82588e-07	NA	downstream	ARFGAP3
5	117030023	NA	NA	NA	NA	NA	NA	NA	NA	NA	NA	NA	NA	NA	7.60954e-07	NA	intronic	TBC1D22A
5	117596244	NA	NA	NA	NA	NA	NA	NA	NA	NA	NA	NA	NA	NA	4.16212e-07	NA	intergenic	MIR2285O-5,FAM19A5
5	119738200	NA	NA	NA	NA	NA	NA	NA	NA	NA	NA	NA	NA	1.47582e-07	NA	NA	intronic	PPP6R2
6	2753765	NA	NA	NA	NA	NA	NA	NA	NA	NA	NA	NA	NA	NA	5.80213e-07	NA	intergenic	NAF1,BBS7
6	15788638	NA	3.79059e-07	NA	NA	NA	NA	NA	NA	NA	NA	NA	NA	NA	NA	NA	intronic	MCUB
6	18879495	NA	NA	NA	4.56486e-07	NA	7.42274e-07	NA	NA	NA	NA	NA	NA	NA	NA	NA	intronic	TBCK
6	19790891	NA	NA	NA	NA	NA	NA	NA	NA	NA	NA	NA	NA	NA	2.403e-07	NA	intronic	PPA2
6	20247445	NA	NA	3.15881e-07	NA	NA	NA	NA	NA	NA	NA	NA	NA	NA	NA	NA	intergenic	TET2,CXXC4
6	23263471	NA	NA	NA	NA	NA	NA	NA	NA	NA	NA	NA	NA	NA	9.47793e-07	NA	intergenic	BANK1,PPP3CA
6	24296359	NA	NA	NA	NA	NA	NA	NA	NA	NA	NA	NA	NA	NA	9.92895e-07	NA	intronic	EMCN
6	24298928	NA	NA	NA	NA	NA	NA	NA	NA	NA	NA	NA	NA	NA	7.09427e-07	NA	intronic	EMCN
6	24397289	NA	NA	NA	NA	NA	NA	NA	NA	NA	NA	NA	NA	NA	1.79761e-09	NA	intergenic	EMCN,DDIT4L
6	24397510	NA	NA	NA	NA	NA	NA	NA	NA	NA	NA	NA	NA	NA	8.902e-07	NA	intergenic	EMCN,DDIT4L
6	25886589	NA	NA	NA	NA	NA	NA	NA	NA	NA	NA	NA	NA	NA	8.77009e-08	NA	intergenic	EIF4E,TSPAN5
6	27251496	NA	NA	NA	NA	NA	NA	NA	NA	NA	NA	NA	NA	NA	5.35567e-07	NA	intergenic	TRNAC-GCA,LOC530285
6	27410712	NA	NA	NA	NA	NA	NA	NA	NA	NA	NA	NA	NA	NA	2.39665e-07	NA	intergenic	TRNAC-GCA,LOC530285
6	33314836	NA	7.18363e-07	3.95065e-07	NA	NA	NA	NA	NA	NA	NA	NA	NA	NA	NA	NA	intronic	CCSER1
6	34161458	NA	7.13939e-07	NA	NA	NA	NA	NA	NA	NA	NA	NA	NA	NA	NA	NA	exonic	CCSER1
6	34300136	NA	1.13877e-07	NA	NA	NA	NA	NA	NA	NA	NA	NA	NA	NA	NA	NA	intronic	CCSER1
6	34507371	NA	NA	2.05129e-07	3.00147e-07	NA	NA	NA	NA	NA	NA	NA	NA	NA	NA	NA	intergenic	CCSER1,MMRN1
6	35487286	NA	7.70449e-09	4.37854e-07	5.0057e-07	NA	1.32065e-07	NA	NA	NA	NA	NA	NA	NA	NA	NA	intergenic	SNCA,GPRIN3
6	35513910	NA	NA	8.45165e-07	NA	NA	NA	NA	NA	NA	NA	NA	NA	NA	NA	NA	intronic	GPRIN3
6	35517005	NA	6.006e-07	2.08784e-07	3.81877e-07	NA	6.01142e-07	NA	NA	NA	NA	NA	NA	NA	NA	NA	intronic	GPRIN3
6	39266447	NA	8.57009e-07	1.91169e-07	NA	NA	NA	NA	NA	NA	NA	NA	NA	NA	NA	NA	intergenic	LCORL,SLIT2
6	39428294	NA	6.1212e-07	1.38451e-07	NA	NA	NA	NA	NA	NA	NA	NA	NA	NA	NA	NA	intergenic	LCORL,SLIT2
6	40057981	NA	NA	NA	NA	NA	NA	NA	NA	NA	NA	NA	NA	7.57044e-07	NA	NA	intronic	SLIT2
6	48746149	NA	NA	7.78888e-07	8.59083e-09	2.90977e-07	1.1486e-07	NA	NA	NA	NA	NA	NA	NA	NA	NA	intergenic	TRNAS-GGA,PCDH7
6	53183543	NA	NA	NA	NA	NA	NA	NA	NA	NA	NA	NA	NA	NA	5.34411e-07	NA	intergenic	TRNAC-GCA,NONE
6	53183584	NA	NA	NA	NA	NA	NA	NA	NA	NA	NA	NA	NA	NA	6.03515e-07	NA	intergenic	TRNAC-GCA,NONE
6	53745609	NA	NA	NA	NA	NA	NA	NA	NA	NA	NA	NA	NA	NA	1.17354e-10	NA	intergenic	TRNAC-GCA,ARAP2
6	53745625	NA	NA	NA	NA	NA	NA	NA	NA	NA	NA	NA	NA	NA	4.68002e-07	NA	intergenic	TRNAC-GCA,ARAP2
6	56028676	NA	8.17446e-07	6.93002e-07	NA	NA	NA	NA	NA	NA	NA	NA	NA	NA	NA	NA	intergenic	DTHD1,LOC525433
6	56230762	NA	3.78013e-07	7.92281e-08	NA	NA	8.75618e-07	NA	NA	NA	NA	NA	NA	NA	NA	NA	intergenic	DTHD1,LOC525433
6	57229243	NA	6.3975e-07	NA	NA	NA	NA	NA	NA	NA	NA	NA	NA	NA	NA	NA	intronic	TBC1D1
6	57245890	NA	2.53787e-07	NA	NA	NA	NA	NA	NA	NA	NA	NA	NA	NA	NA	NA	intronic	TBC1D1
6	57288155	NA	3.20359e-08	NA	2.59905e-07	NA	1.57994e-07	NA	NA	NA	NA	NA	NA	NA	NA	NA	intronic	TBC1D1
6	57289694	NA	1.60042e-07	NA	NA	NA	NA	NA	NA	NA	NA	NA	NA	NA	NA	NA	intronic	TBC1D1
6	57437315	NA	2.70022e-07	1.37751e-07	NA	NA	NA	NA	NA	NA	NA	NA	NA	NA	NA	NA	intergenic	TBC1D1,TRNAI-AAU
6	57486298	NA	NA	NA	2.94114e-07	4.28197e-07	2.08104e-07	NA	NA	NA	NA	NA	NA	NA	NA	NA	intergenic	TBC1D1,TRNAI-AAU
6	60259683	NA	NA	6.93988e-07	NA	NA	NA	NA	NA	NA	NA	NA	NA	NA	NA	NA	intronic	LIMCH1
6	60263698	NA	9.04429e-08	NA	NA	NA	NA	NA	NA	NA	NA	NA	NA	NA	NA	NA	intronic	LIMCH1
6	62071426	NA	2.14409e-07	NA	3.44336e-08	3.46883e-09	1.19176e-08	NA	NA	NA	1.51259e-08	3.63944e-08	NA	NA	NA	1.12015e-07	intergenic	GRXCR1,TRNAC-ACA
6	62071611	NA	NA	NA	NA	NA	NA	NA	NA	NA	7.23749e-07	NA	NA	NA	NA	NA	intergenic	GRXCR1,TRNAC-ACA
6	62153552	NA	4.42992e-07	NA	NA	NA	NA	NA	NA	NA	NA	NA	NA	NA	NA	NA	intergenic	GRXCR1,TRNAC-ACA
6	62171241	NA	7.46151e-07	NA	NA	NA	NA	NA	NA	NA	NA	NA	NA	NA	NA	NA	intergenic	GRXCR1,TRNAC-ACA
6	62171359	NA	3.02341e-09	2.14693e-07	2.19283e-08	7.9169e-07	3.18902e-08	NA	NA	NA	NA	NA	NA	NA	NA	NA	intergenic	GRXCR1,TRNAC-ACA
6	62171532	NA	3.78149e-11	9.20008e-09	5.27212e-10	3.80461e-08	7.02504e-10	NA	NA	NA	NA	NA	NA	NA	NA	1.24687e-07	intergenic	GRXCR1,TRNAC-ACA
6	62193451	NA	4.36673e-09	4.67365e-07	4.81537e-07	NA	3.38279e-07	NA	NA	NA	NA	NA	NA	NA	NA	NA	intergenic	GRXCR1,TRNAC-ACA
6	62195588	NA	7.30432e-07	NA	NA	NA	NA	NA	NA	NA	NA	NA	NA	NA	NA	NA	intergenic	GRXCR1,TRNAC-ACA
6	62197071	NA	1.59264e-10	9.42479e-09	2.15795e-07	NA	7.12193e-08	NA	NA	NA	NA	NA	NA	NA	NA	NA	intergenic	GRXCR1,TRNAC-ACA
6	62197160	NA	2.53407e-10	1.77741e-08	3.22295e-07	NA	1.05498e-07	NA	NA	NA	NA	NA	NA	NA	NA	NA	intergenic	GRXCR1,TRNAC-ACA
6	62197241	NA	1.07158e-08	4.23875e-07	NA	NA	NA	NA	NA	NA	NA	NA	NA	NA	NA	NA	intergenic	GRXCR1,TRNAC-ACA
6	62197297	NA	5.37516e-09	5.78658e-07	NA	NA	6.25871e-07	NA	NA	NA	NA	NA	NA	NA	NA	NA	intergenic	GRXCR1,TRNAC-ACA
6	62198689	NA	6.41879e-08	NA	3.58681e-07	NA	5.61549e-07	NA	NA	NA	NA	NA	NA	NA	NA	NA	intergenic	GRXCR1,TRNAC-ACA
6	62223934	NA	3.35384e-08	7.1536e-07	4.31238e-07	NA	6.8847e-07	NA	NA	NA	NA	NA	NA	NA	NA	NA	intergenic	GRXCR1,TRNAC-ACA
6	62226888	NA	7.15867e-08	NA	NA	NA	NA	NA	NA	NA	NA	NA	NA	NA	NA	NA	intergenic	GRXCR1,TRNAC-ACA
6	62231090	NA	5.46201e-08	NA	NA	NA	NA	NA	NA	NA	NA	NA	NA	NA	NA	NA	intergenic	GRXCR1,TRNAC-ACA
6	62231121	NA	9.75839e-10	1.15833e-07	2.26351e-07	NA	1.23957e-07	NA	NA	NA	NA	NA	NA	NA	NA	NA	intergenic	GRXCR1,TRNAC-ACA
6	62236934	NA	9.59141e-07	NA	NA	NA	NA	NA	NA	NA	NA	NA	NA	NA	NA	NA	intergenic	GRXCR1,TRNAC-ACA
6	62240183	NA	NA	NA	NA	NA	NA	NA	NA	NA	NA	NA	NA	NA	1.70912e-07	NA	intergenic	GRXCR1,TRNAC-ACA
6	62245709	NA	2.29531e-07	NA	NA	NA	NA	NA	NA	NA	NA	NA	NA	NA	NA	NA	intergenic	GRXCR1,TRNAC-ACA
6	62249401	NA	1.48518e-08	2.89484e-07	5.84901e-07	NA	5.50675e-07	NA	NA	NA	NA	NA	NA	NA	NA	NA	intergenic	GRXCR1,TRNAC-ACA
6	62256291	NA	1.30717e-10	1.08363e-08	1.74763e-09	6.19722e-07	3.40296e-09	NA	NA	NA	NA	NA	NA	NA	NA	NA	intergenic	GRXCR1,TRNAC-ACA
6	62300128	NA	1.89994e-07	NA	NA	NA	NA	NA	NA	NA	NA	NA	NA	NA	NA	NA	intergenic	GRXCR1,TRNAC-ACA
6	62350221	NA	NA	NA	9.4752e-08	NA	5.11878e-07	NA	NA	NA	NA	NA	NA	NA	NA	NA	ncRNA_exonic	TRNAC-ACA
6	63167207	NA	8.27659e-07	NA	NA	NA	NA	NA	NA	NA	NA	NA	NA	NA	NA	NA	intergenic	KCTD8,YIPF7
6	63168052	NA	3.66714e-09	2.20291e-08	6.1707e-09	NA	1.47905e-08	NA	NA	NA	NA	NA	NA	NA	NA	5.19175e-07	intergenic	KCTD8,YIPF7
6	63168057	NA	1.82611e-08	9.33345e-08	2.67937e-08	NA	5.9759e-08	NA	NA	NA	NA	NA	NA	NA	NA	NA	intergenic	KCTD8,YIPF7
6	63168165	NA	1.63054e-08	NA	NA	NA	NA	NA	NA	NA	NA	NA	NA	NA	NA	NA	intergenic	KCTD8,YIPF7
6	64121181	NA	2.6205e-07	5.96219e-08	NA	NA	NA	NA	NA	NA	NA	NA	NA	NA	NA	NA	intergenic	TRNAC-ACA,GABRG1
6	64337588	NA	1.99113e-08	NA	NA	NA	NA	NA	NA	NA	NA	NA	NA	NA	NA	NA	intergenic	TRNAC-ACA,GABRG1
6	64346884	NA	7.33063e-07	NA	NA	NA	NA	NA	NA	NA	NA	NA	NA	NA	NA	NA	intergenic	TRNAC-ACA,GABRG1
6	64939434	1.05018e-07	NA	NA	NA	NA	NA	NA	NA	NA	NA	NA	NA	NA	NA	NA	intronic	GABRA2
6	66759133	NA	7.24063e-08	NA	NA	NA	NA	NA	NA	NA	NA	NA	NA	NA	NA	NA	intronic	TXK
6	66806193	NA	NA	NA	NA	NA	NA	NA	NA	NA	NA	NA	NA	NA	6.02034e-08	NA	intronic	TXK
6	71890130	NA	2.83642e-07	NA	NA	NA	NA	NA	NA	NA	NA	NA	NA	NA	NA	NA	downstream	ARL9
6	83036645	4.0517e-07	NA	NA	NA	NA	NA	NA	NA	NA	NA	NA	NA	NA	NA	NA	intergenic	EPHA5,CENPC
6	86575906	NA	NA	NA	NA	NA	NA	NA	NA	NA	NA	NA	NA	3.66524e-07	NA	NA	intronic	SLC4A4
6	86577578	NA	NA	NA	NA	NA	NA	NA	NA	NA	NA	NA	NA	2.6721e-07	NA	NA	intronic	SLC4A4
6	86749356	1.12486e-07	NA	NA	NA	NA	NA	NA	NA	NA	NA	NA	NA	NA	NA	NA	intronic	SLC4A4
6	87568337	NA	5.97681e-08	NA	NA	NA	9.3914e-07	NA	NA	NA	NA	NA	NA	NA	NA	NA	intronic	ADAMTS3
6	89165796	NA	NA	NA	NA	NA	NA	NA	NA	NA	NA	NA	NA	5.68113e-07	NA	NA	intronic	MTHFD2L
6	90273030	NA	NA	NA	NA	NA	NA	NA	NA	NA	NA	NA	NA	8.13718e-07	NA	NA	intergenic	PARM1,RCHY1
6	98684019	NA	NA	NA	NA	NA	NA	NA	NA	NA	NA	NA	NA	NA	4.5905e-07	NA	intergenic	GPAT3,NKX6-1
6	105139677	NA	NA	NA	NA	NA	NA	NA	NA	NA	NA	NA	NA	NA	4.91457e-07	NA	intronic	SLC2A9
6	116889558	NA	NA	NA	2.77769e-07	NA	NA	NA	NA	NA	NA	NA	NA	NA	NA	NA	intronic	FAM53A
6	116906074	NA	NA	NA	8.41104e-07	NA	NA	NA	NA	NA	NA	NA	NA	NA	NA	NA	intergenic	FAM53A,LOC104972780
6	116906093	NA	NA	NA	1.22073e-07	NA	NA	NA	NA	NA	NA	NA	NA	NA	NA	NA	intergenic	FAM53A,LOC104972780
6	116906141	NA	NA	NA	6.23929e-07	NA	NA	NA	NA	NA	NA	NA	NA	NA	NA	NA	intergenic	FAM53A,LOC104972780
7	723083	NA	NA	NA	NA	NA	NA	NA	NA	NA	NA	NA	NA	NA	9.02845e-08	NA	intergenic	CNOT6,GFPT2
7	782962	NA	NA	NA	NA	NA	NA	NA	NA	NA	NA	NA	NA	NA	8.22852e-07	NA	intergenic	CNOT6,GFPT2
7	1670271	6.15964e-09	NA	NA	NA	NA	NA	NA	NA	NA	NA	NA	NA	NA	NA	NA	intergenic	CBY3,HNRNPH1
7	1670280	6.15964e-09	NA	NA	NA	NA	NA	NA	NA	NA	NA	NA	NA	NA	NA	NA	intergenic	CBY3,HNRNPH1
7	8713152	NA	NA	NA	NA	NA	NA	NA	NA	NA	NA	8.83633e-07	NA	NA	NA	NA	intergenic	LOC618007,LOC509410
7	8830366	NA	NA	NA	1.68559e-07	1.59893e-07	8.14119e-07	NA	NA	NA	NA	6.83387e-07	NA	NA	NA	NA	intergenic	LOC787882,LOC112447485
7	8897033	NA	NA	NA	3.07584e-07	5.58823e-08	NA	NA	NA	NA	NA	NA	NA	NA	NA	NA	intergenic	LOC783492,LOC512948
7	8973356	NA	NA	NA	8.95545e-07	NA	NA	NA	NA	NA	NA	NA	NA	NA	NA	NA	intergenic	LOC507378,LOC510625
7	9220280	NA	NA	NA	1.25398e-07	2.53317e-08	8.99428e-07	NA	NA	NA	NA	1.11234e-07	NA	NA	NA	NA	intergenic	LOC541022,LOC785624
7	9494177	NA	NA	NA	NA	NA	NA	NA	NA	NA	NA	3.19086e-07	NA	NA	NA	NA	intergenic	LOC789504,LOC100847301
7	9533105	NA	NA	NA	NA	2.56331e-07	NA	NA	NA	NA	NA	9.66132e-08	NA	NA	NA	NA	intergenic	LOC789504,LOC100847301
7	10261863	NA	NA	NA	3.92916e-07	2.08362e-07	NA	NA	NA	NA	NA	6.58578e-07	NA	NA	NA	NA	intergenic	LOC100138633,LOC786119
7	12045330	NA	NA	NA	NA	NA	NA	NA	NA	NA	8.64711e-07	6.43198e-07	NA	NA	NA	NA	intergenic	TRNAG-UCC,CACNA1A
7	12074851	NA	NA	NA	NA	NA	NA	NA	NA	NA	6.91928e-07	3.78977e-07	NA	NA	NA	NA	intergenic	TRNAG-UCC,CACNA1A
7	16251603	NA	4.82508e-07	3.36484e-07	NA	NA	NA	NA	NA	NA	NA	NA	NA	NA	NA	NA	intronic	ARHGEF18
7	17230686	NA	8.27547e-07	NA	NA	NA	NA	NA	NA	NA	NA	NA	NA	NA	NA	NA	UTR3	LOC101904824
7	20223982	NA	NA	NA	5.0529e-07	2.57172e-07	NA	NA	NA	NA	NA	2.92906e-07	NA	NA	NA	NA	intronic	TJP3
7	23472409	NA	NA	NA	NA	NA	NA	5.4102e-07	NA	NA	NA	NA	NA	NA	NA	NA	intergenic	HINT1,CHSY3
7	26133347	3.56685e-07	NA	NA	NA	NA	NA	NA	NA	NA	NA	NA	NA	NA	NA	NA	intergenic	SLC12A2,CCDC192
7	30115114	NA	NA	NA	NA	9.81806e-07	NA	NA	NA	NA	NA	NA	NA	NA	NA	NA	intergenic	LOC107132619,CSNK1G3
7	30138824	NA	NA	NA	9.93651e-07	NA	NA	NA	NA	NA	NA	NA	NA	NA	NA	NA	intronic	CSNK1G3
7	30601561	NA	NA	NA	9.46201e-07	NA	NA	NA	NA	NA	NA	NA	NA	NA	NA	NA	intergenic	CEP120,PRDM6
7	31190232	NA	NA	NA	NA	NA	NA	NA	NA	NA	NA	NA	NA	NA	8.43729e-09	NA	intergenic	SNX2,SNCAIP
7	31190267	NA	NA	NA	NA	NA	NA	NA	NA	NA	NA	NA	NA	NA	5.39988e-07	NA	intergenic	SNX2,SNCAIP
7	31190299	NA	NA	NA	NA	NA	NA	NA	NA	NA	NA	NA	NA	NA	7.05553e-09	NA	intergenic	SNX2,SNCAIP
7	31203939	NA	NA	NA	NA	NA	NA	NA	NA	NA	NA	NA	NA	NA	3.30187e-08	NA	intergenic	SNX2,SNCAIP
7	31204176	NA	NA	NA	NA	NA	NA	NA	NA	NA	NA	NA	NA	NA	3.35762e-08	NA	intergenic	SNX2,SNCAIP
7	31307250	6.65489e-07	NA	NA	NA	NA	NA	NA	NA	NA	NA	NA	NA	NA	NA	NA	intergenic	SNX2,SNCAIP
7	31325374	NA	7.68227e-07	NA	NA	NA	NA	NA	NA	NA	NA	NA	NA	NA	NA	NA	intergenic	SNX2,SNCAIP
7	33009486	NA	8.79375e-07	NA	NA	NA	NA	NA	NA	NA	NA	NA	NA	NA	NA	NA	intergenic	FAM170A,NONE
7	33327712	NA	NA	NA	NA	4.25698e-07	NA	NA	NA	NA	NA	NA	NA	NA	NA	NA	intronic	PRR16
7	34559441	NA	NA	4.22152e-07	3.91077e-07	NA	6.48489e-07	NA	NA	NA	NA	NA	NA	NA	NA	NA	intronic	TNFAIP8
7	35581420	NA	1.95728e-07	NA	NA	NA	NA	NA	NA	NA	NA	NA	NA	NA	NA	NA	intergenic	DTWD2,SEMA6A
7	35722727	NA	NA	NA	6.33247e-07	NA	NA	NA	NA	NA	NA	NA	NA	NA	NA	NA	intergenic	DTWD2,SEMA6A
7	35727767	NA	NA	NA	4.85946e-07	NA	NA	NA	NA	NA	NA	NA	NA	NA	NA	NA	intergenic	DTWD2,SEMA6A
7	35739806	NA	NA	NA	1.08004e-07	NA	3.82588e-07	NA	NA	NA	NA	NA	NA	NA	NA	NA	intergenic	DTWD2,SEMA6A
7	36025724	NA	NA	NA	NA	3.80531e-07	4.335e-07	NA	NA	NA	2.50572e-07	3.60508e-07	NA	NA	NA	NA	intergenic	DTWD2,SEMA6A
7	36445991	NA	2.71889e-07	5.66721e-07	NA	NA	NA	NA	NA	NA	NA	NA	NA	NA	NA	NA	intergenic	DTWD2,SEMA6A
7	39240351	5.39755e-07	NA	NA	NA	NA	NA	NA	NA	NA	NA	NA	NA	NA	NA	NA	intronic	RMND5B
7	48534462	NA	NA	NA	5.64073e-07	4.52978e-07	NA	NA	NA	NA	NA	NA	NA	NA	NA	NA	intronic	SPOCK1
7	48539635	NA	NA	NA	NA	1.25953e-07	NA	NA	NA	NA	NA	6.0935e-07	NA	NA	NA	NA	intronic	SPOCK1
7	48539781	NA	NA	NA	7.45791e-07	6.84511e-08	NA	NA	NA	NA	NA	9.73251e-08	NA	NA	NA	NA	intronic	SPOCK1
7	48539801	NA	NA	NA	NA	4.58722e-07	NA	NA	NA	NA	NA	7.76053e-07	NA	NA	NA	NA	intronic	SPOCK1
7	48553132	NA	NA	NA	4.70636e-07	3.24171e-07	NA	NA	NA	NA	NA	8.30515e-07	NA	NA	NA	NA	intronic	SPOCK1
7	51590324	NA	NA	NA	5.88754e-07	NA	NA	NA	NA	NA	NA	NA	NA	NA	NA	NA	intergenic	SLC4A9,TRNAE-CUC
7	52527670	NA	NA	NA	1.6363e-07	2.57435e-07	NA	NA	NA	NA	NA	7.15798e-07	NA	NA	NA	5.01542e-07	intronic	PCDHGA2,PCDHGA8,PCDHGB4
7	52548572	NA	NA	NA	7.33497e-07	3.24154e-07	NA	NA	NA	NA	NA	NA	NA	NA	NA	NA	intronic	PCDHGA2,PCDHGA8,PCDHGB4
7	52549387	NA	NA	NA	4.16398e-08	7.4674e-09	1.31223e-07	NA	NA	NA	9.0476e-07	3.16235e-07	6.41539e-07	NA	NA	5.14123e-07	intronic	PCDHGA2,PCDHGA8,PCDHGB4
7	52549452	NA	NA	NA	NA	2.67379e-07	NA	NA	NA	NA	NA	NA	NA	NA	NA	NA	intronic	PCDHGA2,PCDHGA8,PCDHGB4
7	52550767	NA	NA	NA	3.30802e-07	1.02484e-08	6.9422e-07	NA	NA	NA	1.44588e-07	2.15335e-08	8.21636e-08	NA	NA	4.27046e-07	intronic	PCDHGA2,PCDHGA8,PCDHGB4
7	52550798	NA	NA	NA	NA	8.80597e-08	NA	NA	NA	NA	6.53988e-07	3.19075e-08	2.30874e-08	NA	NA	7.42155e-07	intronic	PCDHGA2,PCDHGA8,PCDHGB4
7	52551835	NA	NA	NA	5.34279e-07	7.15599e-07	NA	NA	NA	NA	NA	NA	NA	NA	NA	NA	intronic	PCDHGA2,PCDHGA8,PCDHGB4
7	52552396	NA	NA	NA	NA	6.58746e-07	NA	NA	NA	NA	NA	NA	NA	NA	NA	NA	intronic	PCDHGA2,PCDHGA8,PCDHGB4
7	52552783	NA	NA	NA	3.32651e-07	1.26769e-07	NA	NA	NA	NA	NA	NA	NA	NA	NA	NA	intronic	PCDHGA2,PCDHGA8,PCDHGB4
7	52552860	NA	NA	NA	5.56677e-07	NA	NA	NA	NA	NA	NA	NA	NA	NA	NA	NA	intronic	PCDHGA2,PCDHGA8,PCDHGB4
7	52552999	NA	NA	NA	2.09175e-08	1.27334e-09	5.12251e-08	NA	NA	NA	3.38308e-08	1.27684e-08	4.22192e-07	NA	NA	3.32776e-08	intronic	PCDHGA2,PCDHGA8,PCDHGB4
7	52553561	NA	NA	NA	6.84829e-08	1.49439e-07	4.80947e-07	NA	NA	NA	NA	5.03159e-07	5.89942e-08	NA	NA	3.20465e-07	intronic	PCDHGA2,PCDHGA8,PCDHGB4
7	52711394	NA	NA	NA	7.98615e-08	1.13189e-07	5.12904e-07	NA	NA	NA	NA	9.46623e-08	NA	NA	NA	NA	intronic	DIAPH1
7	54733678	NA	NA	NA	7.03039e-07	NA	7.11814e-07	NA	NA	NA	NA	NA	NA	NA	NA	6.52807e-07	intergenic	NR3C1,TRNAC-GCA
7	54853109	NA	NA	3.27039e-07	NA	NA	NA	NA	NA	NA	NA	NA	NA	NA	NA	NA	intergenic	NR3C1,TRNAC-GCA
7	54853924	NA	NA	NA	NA	NA	NA	NA	NA	NA	NA	NA	NA	NA	NA	6.37525e-07	intergenic	NR3C1,TRNAC-GCA
7	54904627	NA	NA	NA	NA	1.81403e-07	4.66548e-07	NA	NA	NA	4.85664e-07	NA	NA	NA	NA	NA	intergenic	NR3C1,TRNAC-GCA
7	55266677	NA	NA	NA	1.23886e-07	4.44809e-07	4.80738e-07	NA	NA	NA	NA	NA	NA	NA	NA	NA	intronic	YIPF5
7	57801851	NA	NA	NA	NA	NA	NA	NA	NA	NA	NA	5.42181e-07	NA	NA	NA	NA	intronic	PPP2R2B
7	57904295	NA	NA	NA	NA	4.13009e-07	NA	NA	NA	NA	2.77543e-07	1.1871e-07	4.86853e-07	NA	NA	NA	intronic	PPP2R2B
7	57912224	NA	NA	NA	NA	6.75029e-07	NA	NA	NA	NA	1.01719e-07	1.04073e-07	NA	NA	NA	NA	intronic	PPP2R2B
7	57915690	NA	NA	NA	8.80696e-07	6.00791e-07	NA	NA	NA	NA	1.37532e-07	7.48908e-08	NA	NA	NA	9.67878e-07	intronic	PPP2R2B
7	57915691	NA	NA	NA	8.80696e-07	6.00791e-07	NA	NA	NA	NA	1.37532e-07	7.48908e-08	NA	NA	NA	9.67878e-07	intronic	PPP2R2B
7	57915793	NA	NA	NA	7.26094e-07	5.46612e-07	NA	NA	NA	NA	8.56397e-08	1.10475e-07	NA	NA	NA	NA	intronic	PPP2R2B
7	61140452	NA	NA	NA	NA	NA	NA	NA	NA	NA	3.29681e-07	NA	NA	NA	NA	NA	intronic	PPARGC1B
7	61140972	NA	NA	NA	NA	NA	NA	NA	NA	NA	7.89523e-07	NA	NA	NA	NA	NA	intronic	PPARGC1B
7	61142397	NA	NA	NA	2.33229e-07	1.19051e-07	8.94421e-07	NA	NA	NA	2.04808e-08	7.79717e-08	NA	NA	NA	7.26301e-07	intronic	PPARGC1B
7	61148378	NA	NA	NA	NA	NA	NA	NA	NA	NA	4.48467e-07	2.16078e-07	NA	NA	NA	9.2678e-07	intronic	PPARGC1B
7	61180687	NA	NA	NA	2.37754e-07	2.53966e-08	7.35325e-07	NA	NA	NA	1.47387e-07	2.24311e-08	NA	NA	NA	NA	intronic	PPARGC1B
7	61604791	1.9965e-07	NA	NA	NA	NA	NA	NA	NA	NA	NA	NA	NA	NA	NA	NA	intronic	CAMK2A
7	62736849	NA	NA	NA	NA	4.67586e-08	NA	NA	NA	NA	1.33147e-08	4.41745e-09	NA	NA	NA	5.37761e-07	intronic	FAT2
7	62737247	NA	NA	NA	NA	NA	NA	NA	NA	NA	7.13453e-07	9.27122e-07	NA	NA	NA	NA	intronic	FAT2
7	62742888	NA	NA	NA	NA	NA	NA	NA	NA	NA	NA	5.51136e-07	NA	NA	NA	NA	intronic	FAT2
7	62743333	NA	NA	NA	6.69857e-07	7.14502e-09	4.1548e-07	NA	NA	NA	1.71489e-08	3.54506e-09	NA	NA	NA	1.3244e-07	exonic	FAT2
7	62760561	NA	NA	NA	NA	NA	NA	NA	NA	NA	NA	9.64102e-07	NA	NA	NA	NA	exonic	FAT2
7	62761721	NA	NA	NA	NA	3.16518e-07	NA	NA	NA	NA	7.4689e-07	4.79856e-07	NA	NA	NA	NA	intronic	FAT2
7	62771122	NA	NA	NA	NA	2.65025e-07	NA	NA	NA	NA	1.34063e-07	1.44639e-07	NA	NA	NA	7.54069e-07	intronic	FAT2
7	62782217	NA	NA	NA	3.20071e-07	1.5804e-07	4.9702e-07	NA	NA	NA	NA	NA	NA	NA	NA	NA	intronic	FAT2
7	62795042	NA	NA	NA	NA	3.01231e-07	NA	NA	NA	NA	1.22953e-07	1.13787e-07	NA	NA	NA	2.26869e-07	intronic	FAT2
7	62804802	NA	NA	NA	NA	4.46049e-07	NA	NA	NA	NA	4.26911e-07	5.50497e-08	NA	NA	NA	NA	intergenic	FAT2,SPARC
7	62804840	NA	NA	NA	NA	2.80191e-07	NA	NA	NA	NA	2.21064e-07	4.74135e-08	NA	NA	NA	NA	intergenic	FAT2,SPARC
7	62805738	NA	NA	NA	NA	4.63299e-07	NA	NA	NA	NA	NA	5.10036e-07	NA	NA	NA	NA	intergenic	FAT2,SPARC
7	62806291	NA	NA	NA	NA	NA	NA	NA	NA	NA	NA	7.69337e-07	NA	NA	NA	NA	intergenic	FAT2,SPARC
7	62811379	NA	NA	NA	2.51547e-07	3.54542e-09	2.20574e-07	NA	NA	NA	4.88986e-09	1.23094e-08	8.02456e-07	NA	NA	2.66656e-07	intergenic	FAT2,SPARC
7	62811380	NA	NA	NA	2.51547e-07	3.54542e-09	2.20574e-07	NA	NA	NA	4.88986e-09	1.23094e-08	8.02456e-07	NA	NA	2.66656e-07	intergenic	FAT2,SPARC
7	62811928	NA	NA	NA	2.0783e-07	1.65541e-08	4.10247e-07	NA	NA	NA	2.49333e-07	2.75616e-07	NA	NA	NA	NA	intergenic	FAT2,SPARC
7	62832280	NA	NA	NA	NA	6.24298e-07	NA	NA	NA	NA	1.74062e-07	3.12443e-07	NA	NA	NA	NA	intergenic	FAT2,SPARC
7	62832293	NA	NA	NA	NA	NA	NA	NA	NA	NA	3.08636e-07	4.7324e-07	NA	NA	NA	NA	intergenic	FAT2,SPARC
7	62834873	NA	NA	NA	NA	5.52254e-07	NA	NA	NA	NA	NA	9.46091e-07	NA	NA	NA	NA	intergenic	FAT2,SPARC
7	63547947	NA	NA	NA	NA	NA	NA	NA	NA	NA	NA	5.95108e-07	NA	NA	NA	NA	intergenic	GLRA1,NMUR2
7	65280674	NA	NA	NA	NA	NA	NA	NA	NA	NA	7.12352e-07	4.6921e-07	7.36731e-07	NA	NA	3.20628e-07	intergenic	GRIA1,FAM114A2
7	66088847	NA	NA	6.67588e-07	3.77627e-07	NA	NA	NA	NA	NA	NA	NA	NA	NA	NA	NA	intronic	GEMIN5
7	67080666	NA	NA	NA	1.20519e-07	NA	5.18717e-07	NA	NA	NA	NA	NA	NA	NA	NA	NA	intronic	SGCD
7	67838835	4.247e-07	NA	NA	NA	NA	NA	NA	NA	NA	NA	NA	NA	NA	NA	NA	intronic	SGCD
7	67895523	7.69772e-07	NA	NA	NA	NA	NA	NA	NA	NA	NA	NA	NA	NA	NA	NA	intronic	SGCD
7	67909629	9.63362e-07	NA	NA	NA	NA	NA	NA	NA	NA	NA	NA	NA	NA	NA	NA	intronic	SGCD
7	69068989	NA	NA	NA	NA	NA	NA	NA	NA	NA	NA	NA	NA	NA	1.21176e-07	NA	intronic	CYFIP2
7	69069519	NA	NA	NA	NA	NA	NA	NA	NA	NA	NA	NA	NA	NA	1.86242e-08	NA	intronic	CYFIP2
7	69071302	NA	NA	NA	NA	NA	NA	NA	NA	NA	NA	NA	NA	NA	9.46223e-07	NA	intronic	CYFIP2
7	69071716	NA	NA	NA	NA	NA	NA	NA	NA	NA	NA	NA	NA	NA	5.7583e-07	NA	intronic	CYFIP2
7	69071883	NA	NA	NA	NA	NA	NA	NA	NA	NA	NA	NA	NA	NA	2.90848e-07	NA	exonic	CYFIP2
7	71698513	NA	NA	NA	NA	NA	NA	NA	NA	NA	NA	NA	NA	NA	6.68128e-08	NA	intergenic	PWWP2A,FABP6
7	71715508	NA	NA	NA	NA	NA	NA	NA	NA	NA	NA	NA	NA	NA	2.37439e-08	NA	intergenic	PWWP2A,FABP6
7	71946240	NA	NA	NA	NA	NA	NA	NA	NA	NA	NA	NA	NA	NA	2.91017e-09	NA	intergenic	C1QTNF2,ZBED8
7	71949079	NA	NA	NA	NA	NA	NA	NA	NA	NA	NA	NA	NA	NA	8.56697e-08	NA	intergenic	C1QTNF2,ZBED8
7	71982611	NA	NA	NA	NA	NA	NA	NA	NA	NA	NA	NA	NA	NA	2.50842e-11	NA	intronic	ZBED8
7	72019540	NA	NA	NA	NA	NA	NA	NA	NA	NA	NA	NA	NA	NA	4.97805e-07	NA	intergenic	PTTG1,MIR146A
7	72022832	NA	NA	NA	NA	NA	NA	NA	NA	NA	NA	NA	NA	NA	6.04677e-07	NA	intergenic	PTTG1,MIR146A
7	72032434	NA	NA	NA	NA	NA	NA	NA	NA	NA	NA	NA	NA	NA	7.2636e-07	NA	intergenic	PTTG1,MIR146A
7	72317572	NA	NA	NA	NA	NA	NA	NA	NA	NA	NA	NA	NA	NA	4.54458e-07	NA	intronic	ATP10B
7	73122446	NA	NA	NA	NA	NA	NA	NA	NA	NA	NA	NA	NA	NA	4.73056e-07	NA	intronic	GABRB2
7	74298618	NA	NA	NA	NA	NA	NA	NA	NA	NA	NA	NA	NA	NA	1.96383e-08	NA	intergenic	GABRG2,CCNG1
7	74328345	NA	NA	NA	NA	NA	NA	NA	NA	NA	NA	NA	NA	NA	7.51103e-07	NA	intergenic	GABRG2,CCNG1
7	74919886	NA	NA	NA	NA	NA	NA	NA	NA	NA	NA	NA	NA	NA	7.89525e-09	NA	intergenic	GABRG2,CCNG1
7	74935244	NA	NA	NA	NA	NA	NA	NA	NA	NA	NA	NA	NA	NA	2.06613e-09	NA	intergenic	GABRG2,CCNG1
7	74935609	NA	NA	NA	NA	NA	NA	NA	NA	NA	NA	NA	NA	NA	3.18479e-11	NA	intergenic	GABRG2,CCNG1
7	77614275	NA	NA	NA	NA	NA	NA	NA	NA	NA	NA	NA	NA	NA	5.1068e-07	NA	intergenic	TRNAC-ACA,LOC104968964
7	77619306	NA	NA	NA	NA	NA	NA	NA	NA	NA	NA	NA	NA	NA	1.16041e-07	NA	intergenic	TRNAC-ACA,LOC104968964
7	77619749	NA	NA	NA	NA	NA	NA	NA	NA	NA	NA	NA	NA	NA	5.2726e-07	NA	intergenic	TRNAC-ACA,LOC104968964
7	77808234	NA	NA	NA	NA	NA	NA	NA	NA	NA	NA	NA	NA	NA	5.11986e-08	NA	intergenic	TRNAC-ACA,LOC104968964
7	77837258	NA	NA	NA	NA	NA	NA	NA	NA	NA	NA	NA	NA	NA	4.60287e-09	NA	intergenic	TRNAC-ACA,LOC104968964
7	78777507	NA	NA	NA	9.06399e-08	NA	NA	NA	NA	NA	NA	NA	NA	NA	NA	NA	intergenic	LOC104968964,LOC112447478
7	79766171	NA	NA	NA	NA	NA	NA	NA	NA	NA	NA	NA	NA	NA	8.47853e-07	NA	intergenic	LOC112447478,TENM2
7	80903156	NA	NA	NA	NA	NA	NA	NA	NA	NA	NA	NA	NA	NA	1.67865e-07	NA	intronic	MSH3
7	82100729	NA	NA	NA	NA	NA	NA	NA	NA	NA	NA	NA	NA	NA	8.07542e-07	NA	intronic	ATG10
7	82101139	NA	NA	NA	NA	NA	NA	NA	NA	NA	NA	NA	NA	NA	1.70611e-07	NA	intronic	ATG10
7	83782478	NA	9.80694e-07	6.93645e-07	9.39141e-07	NA	NA	NA	NA	NA	NA	NA	NA	NA	NA	NA	intergenic	HAPLN1,EDIL3
7	86825491	NA	8.44924e-07	NA	NA	NA	NA	NA	NA	NA	NA	NA	NA	NA	NA	NA	intergenic	COX7C,RASA1
7	101780560	NA	NA	NA	NA	NA	NA	NA	NA	NA	5.55257e-07	NA	NA	NA	NA	NA	intronic	PAM
7	101795717	NA	NA	NA	NA	NA	NA	NA	NA	NA	4.77679e-07	NA	NA	NA	NA	NA	intronic	PAM
7	101826208	NA	NA	2.50578e-07	NA	NA	NA	NA	NA	NA	NA	NA	NA	NA	NA	NA	intronic	PAM
7	102368768	NA	NA	NA	NA	NA	NA	NA	4.29303e-07	NA	4.98879e-07	NA	NA	NA	NA	4.93579e-07	intergenic	C7H5orf30,LOC101906022
7	102402928	NA	NA	NA	NA	NA	NA	NA	NA	4.47438e-07	NA	NA	NA	NA	NA	NA	intergenic	C7H5orf30,LOC101906022
7	102422863	NA	NA	NA	NA	NA	NA	NA	NA	8.68437e-07	NA	NA	NA	NA	NA	NA	intergenic	C7H5orf30,LOC101906022
7	102426868	NA	NA	NA	NA	NA	NA	NA	NA	3.88576e-07	NA	NA	NA	NA	NA	NA	intergenic	C7H5orf30,LOC101906022
7	102427085	NA	NA	NA	NA	NA	NA	NA	NA	5.23589e-07	NA	NA	NA	NA	NA	NA	intergenic	C7H5orf30,LOC101906022
7	102427134	NA	NA	NA	NA	NA	NA	NA	NA	3.45484e-07	NA	NA	NA	NA	NA	NA	intergenic	C7H5orf30,LOC101906022
7	102427716	NA	NA	NA	NA	NA	NA	NA	NA	8.52278e-08	NA	NA	NA	NA	NA	NA	intergenic	C7H5orf30,LOC101906022
7	102427756	NA	NA	NA	NA	NA	NA	NA	3.53288e-07	1.3974e-08	1.58836e-07	NA	NA	NA	NA	4.14611e-07	intergenic	C7H5orf30,LOC101906022
7	102427767	NA	NA	NA	NA	NA	NA	NA	3.53288e-07	1.3974e-08	1.58836e-07	NA	NA	NA	NA	4.14611e-07	intergenic	C7H5orf30,LOC101906022
7	102457042	NA	NA	NA	NA	NA	NA	NA	NA	NA	4.07567e-07	6.64051e-07	NA	NA	NA	NA	intergenic	C7H5orf30,LOC101906022
7	103630265	NA	7.67769e-07	1.062e-07	NA	NA	NA	NA	NA	NA	NA	NA	NA	NA	NA	NA	intergenic	LOC787122,LOC112447533
7	103646723	NA	NA	3.37035e-07	NA	NA	NA	NA	NA	NA	NA	NA	NA	NA	NA	NA	intergenic	LOC787122,LOC112447533
7	103751073	NA	2.72341e-07	2.58245e-07	NA	NA	NA	NA	NA	NA	NA	NA	NA	NA	NA	NA	intergenic	LOC112447533,NONE
7	105560025	NA	3.47369e-07	3.73936e-08	4.63141e-07	NA	5.04995e-07	NA	NA	NA	NA	NA	NA	NA	NA	NA	intergenic	LOC112447533,TRNAC-ACA
7	106145098	NA	NA	NA	NA	NA	NA	NA	NA	NA	NA	NA	NA	5.5461e-07	NA	NA	intergenic	NONE,TRNAC-ACA
7	110302916	8.97509e-07	NA	NA	NA	NA	NA	NA	NA	NA	NA	NA	NA	NA	NA	NA	intronic	CAMK4
8	721629	NA	1.78567e-07	5.34266e-08	NA	NA	NA	NA	NA	NA	NA	NA	NA	NA	NA	NA	intronic	PALLD
8	4128789	NA	NA	NA	NA	NA	NA	NA	NA	NA	NA	NA	NA	NA	7.05507e-07	NA	intronic	GALNTL6
8	4128796	NA	NA	NA	NA	NA	NA	NA	NA	NA	NA	NA	NA	NA	8.58892e-07	NA	intronic	GALNTL6
8	5300759	NA	NA	NA	NA	NA	NA	NA	NA	NA	NA	NA	NA	NA	7.46506e-07	NA	intronic	GALNTL6
8	5802591	NA	NA	NA	NA	NA	NA	NA	NA	NA	NA	NA	NA	NA	1.35487e-07	NA	intronic	SCRG1
8	7149368	NA	NA	NA	NA	NA	NA	NA	NA	NA	NA	NA	NA	NA	1.03012e-08	NA	intronic	GLRA3
8	9993981	NA	8.15087e-07	NA	3.84921e-07	NA	NA	NA	NA	NA	NA	NA	NA	NA	NA	NA	intronic	EXTL3
8	11719931	NA	4.34393e-07	NA	NA	NA	NA	NA	NA	NA	NA	NA	NA	NA	NA	NA	intergenic	LOC112447866,TRNAC-ACA
8	13114497	NA	NA	8.61179e-07	NA	NA	NA	NA	NA	NA	NA	NA	NA	NA	NA	NA	intergenic	TRNAC-ACA,MIR2285M-5
8	13438793	NA	NA	NA	NA	NA	NA	NA	NA	NA	NA	NA	NA	NA	2.63744e-08	NA	intergenic	MIR2285M-5,LINGO2
8	13682337	NA	2.28604e-07	NA	4.03724e-07	NA	3.44668e-07	NA	NA	NA	NA	NA	NA	NA	NA	NA	intergenic	MIR2285M-5,LINGO2
8	14192766	NA	9.95986e-07	4.35003e-07	NA	NA	NA	NA	NA	NA	NA	NA	NA	NA	NA	NA	intergenic	MIR2285M-5,LINGO2
8	14458673	NA	NA	NA	4.85146e-08	2.01154e-07	1.97641e-07	NA	NA	NA	NA	NA	NA	NA	NA	NA	intergenic	MIR2285M-5,LINGO2
8	21877819	NA	NA	NA	NA	NA	NA	NA	NA	NA	NA	NA	NA	NA	1.78055e-07	NA	intergenic	DMRTA1,CDKN2B
8	21910290	NA	NA	NA	NA	NA	NA	NA	NA	NA	NA	NA	NA	NA	4.55717e-08	NA	intergenic	DMRTA1,CDKN2B
8	22447260	NA	NA	NA	NA	NA	NA	NA	NA	NA	NA	NA	NA	NA	1.79757e-07	NA	intergenic	MTAP,MIR31
8	25795784	NA	3.50331e-10	1.2117e-07	2.04346e-08	NA	2.7257e-08	NA	NA	NA	NA	NA	NA	NA	NA	NA	intronic	ADAMTSL1
8	31642766	NA	NA	NA	2.91605e-08	1.94589e-08	3.42365e-08	NA	NA	NA	NA	NA	NA	NA	NA	NA	exonic	TYRP1
8	31681725	NA	NA	NA	NA	1.87866e-07	NA	NA	NA	NA	NA	7.88459e-07	NA	NA	NA	NA	intergenic	TYRP1,NONE
8	31689118	NA	NA	NA	7.06863e-09	2.00179e-09	9.27136e-09	NA	NA	NA	4.77846e-07	1.89664e-07	NA	NA	NA	NA	intergenic	TYRP1,NONE
8	34130790	NA	NA	NA	NA	3.34904e-07	NA	NA	NA	NA	NA	NA	NA	NA	NA	NA	intergenic	NONE,PTPRD
8	35225732	NA	NA	6.48262e-08	1.58911e-09	4.25258e-10	1.79455e-09	NA	NA	NA	5.6132e-08	1.10496e-07	NA	NA	NA	1.32856e-07	intergenic	NONE,PTPRD
8	35317422	NA	NA	NA	8.22199e-08	1.03702e-08	1.12829e-07	NA	NA	NA	9.75545e-08	4.45681e-07	NA	NA	NA	6.74494e-07	intergenic	NONE,PTPRD
8	38296614	NA	NA	NA	NA	9.10472e-07	NA	NA	NA	NA	NA	NA	NA	NA	NA	NA	intronic	GLDC
8	40147771	NA	NA	NA	6.52683e-08	8.51937e-08	6.95102e-08	NA	NA	NA	NA	NA	NA	NA	NA	NA	intergenic	SLC1A1,GLIS3
8	40286566	NA	NA	NA	NA	8.90549e-07	NA	NA	NA	NA	NA	NA	NA	NA	NA	NA	intronic	GLIS3
8	42503990	NA	NA	NA	6.53544e-07	4.84272e-08	7.98825e-07	NA	NA	NA	NA	4.23136e-07	NA	NA	NA	NA	intronic	SMARCA2
8	42663407	NA	NA	NA	NA	9.24512e-07	NA	NA	NA	NA	NA	NA	NA	NA	NA	NA	intergenic	SMARCA2,TRNAE-UUC
8	42867405	NA	NA	NA	NA	2.7537e-07	NA	NA	NA	NA	NA	8.28152e-07	NA	NA	NA	NA	intergenic	TRNAC-GCA,DMRT2
8	42979390	NA	NA	NA	5.77802e-07	1.3919e-07	6.33221e-07	NA	NA	NA	NA	NA	NA	NA	NA	NA	intergenic	TRNAC-GCA,DMRT2
8	43019971	NA	NA	NA	3.95281e-07	1.41782e-07	2.2356e-07	NA	NA	NA	NA	NA	NA	NA	NA	NA	intergenic	TRNAC-GCA,DMRT2
8	43368312	NA	NA	NA	3.19553e-07	1.00249e-07	3.62353e-07	NA	NA	NA	NA	NA	NA	NA	NA	NA	intergenic	TRNAC-GCA,DMRT2
8	43877660	NA	NA	NA	NA	2.71847e-07	NA	NA	NA	NA	NA	NA	NA	NA	NA	NA	intronic	KANK1
8	43904223	NA	NA	NA	5.16155e-07	7.69863e-08	7.31753e-07	NA	NA	NA	NA	3.63108e-07	NA	NA	NA	NA	intronic	KANK1
8	44449401	NA	NA	NA	7.77833e-07	2.57723e-07	9.7444e-07	NA	NA	NA	NA	NA	NA	NA	NA	NA	intronic	PGM5
8	44510813	NA	NA	NA	4.28126e-07	NA	NA	NA	NA	NA	NA	NA	NA	NA	NA	NA	intronic	PGM5
8	45468810	NA	6.71588e-07	NA	NA	NA	NA	NA	NA	NA	NA	NA	NA	NA	NA	NA	intronic	FAM189A2
8	47319348	7.66526e-07	NA	NA	NA	NA	NA	NA	NA	NA	NA	NA	NA	NA	NA	NA	intergenic	TRPM3,CEMIP2
8	47319651	1.6743e-07	NA	NA	NA	NA	NA	NA	NA	NA	NA	NA	NA	NA	NA	NA	intergenic	TRPM3,CEMIP2
8	63289562	NA	NA	3.74889e-07	9.32739e-08	NA	7.95753e-07	NA	NA	NA	NA	NA	NA	NA	NA	NA	intronic	CORO2A
8	65196859	NA	NA	NA	NA	NA	NA	NA	NA	NA	NA	NA	NA	NA	3.26431e-07	NA	intronic	INVS
8	65204928	NA	NA	NA	NA	NA	NA	NA	NA	NA	NA	NA	NA	NA	4.64766e-08	NA	intronic	INVS
8	65204948	NA	NA	NA	NA	NA	NA	NA	NA	NA	NA	NA	NA	NA	3.49594e-07	NA	intronic	INVS
8	71190362	NA	NA	NA	NA	NA	NA	NA	NA	NA	NA	6.64726e-07	NA	NA	NA	NA	intergenic	STC1,LOC539009
8	71955248	NA	NA	NA	NA	NA	NA	NA	NA	NA	NA	NA	NA	NA	1.02463e-07	NA	intergenic	ADAM7,NEFM
8	71989215	NA	NA	NA	NA	NA	NA	NA	NA	NA	NA	NA	NA	NA	8.50453e-07	NA	intergenic	ADAM7,NEFM
8	74161411	NA	NA	NA	NA	NA	NA	NA	NA	NA	NA	NA	NA	NA	4.75099e-09	NA	intergenic	ADRA1A,STMN4
8	74672870	NA	NA	NA	NA	NA	NA	4.55326e-07	NA	NA	NA	NA	NA	NA	NA	NA	intronic	GULO
8	75103782	NA	NA	NA	NA	NA	NA	8.49062e-07	NA	NA	NA	NA	NA	NA	NA	NA	intronic	NFX1
8	91361297	NA	NA	NA	NA	NA	NA	NA	NA	NA	NA	NA	NA	NA	6.51224e-07	NA	intronic	GRIN3A
8	95840679	NA	NA	NA	NA	4.07843e-08	NA	NA	NA	NA	NA	5.99302e-07	NA	NA	NA	NA	intergenic	TMEM38B,ZNF462
8	105192833	NA	NA	NA	NA	NA	NA	NA	NA	NA	NA	NA	NA	NA	9.85332e-08	NA	intergenic	TRNAC-ACA,PAPPA
8	106753736	NA	NA	NA	2.1007e-07	7.76988e-07	7.60803e-07	NA	NA	NA	NA	NA	NA	NA	NA	NA	intergenic	ASTN2,TLR4
8	108386832	NA	NA	NA	NA	1.07113e-07	NA	NA	NA	NA	3.90999e-07	4.15408e-07	NA	NA	NA	4.50597e-07	intergenic	TLR4,BRINP1
9	3118777	NA	NA	NA	NA	5.89437e-07	NA	NA	NA	NA	3.17345e-07	NA	NA	NA	NA	9.03823e-07	intergenic	NONE,NONE
9	21847345	NA	NA	NA	NA	NA	NA	NA	NA	NA	NA	NA	NA	NA	4.11096e-07	NA	intergenic	FAM46A,TRNAG-CCC
9	28994976	NA	NA	NA	NA	NA	NA	NA	NA	NA	NA	NA	NA	NA	2.77498e-09	NA	intergenic	HSF2,GJA1
9	31640067	NA	NA	NA	NA	8.99749e-07	NA	NA	NA	NA	8.10049e-08	5.97846e-08	NA	NA	NA	NA	intergenic	TRNAK-UUU,MAN1A1
9	31657883	NA	NA	NA	NA	NA	NA	NA	NA	NA	4.0416e-07	NA	NA	NA	NA	NA	intergenic	TRNAK-UUU,MAN1A1
9	31689960	NA	NA	NA	NA	NA	NA	NA	NA	NA	6.95753e-07	NA	NA	NA	NA	NA	intronic	MAN1A1
9	33433243	NA	6.8537e-07	NA	NA	NA	NA	NA	NA	NA	NA	NA	NA	NA	NA	NA	intronic	ROS1
9	35893364	NA	NA	NA	NA	NA	NA	NA	NA	NA	6.66648e-07	NA	NA	NA	NA	NA	intergenic	FRK,HS3ST5
9	35917053	NA	2.34104e-07	NA	3.28188e-07	NA	3.92302e-07	NA	NA	NA	NA	NA	NA	NA	NA	NA	intergenic	FRK,HS3ST5
9	40589700	NA	NA	NA	NA	NA	NA	NA	NA	NA	NA	NA	NA	NA	4.5601e-07	NA	intronic	AK9
9	53319719	NA	NA	NA	NA	3.78853e-07	NA	NA	NA	NA	1.89956e-07	4.27993e-07	NA	NA	NA	NA	intergenic	UFL1,FUT9
9	65187394	NA	NA	NA	NA	NA	NA	NA	NA	NA	NA	NA	NA	NA	8.22794e-07	NA	intronic	CEP162
9	65187397	NA	NA	NA	NA	NA	NA	NA	NA	NA	NA	NA	NA	NA	8.22794e-07	NA	intronic	CEP162
9	72398323	NA	NA	NA	9.15257e-07	NA	NA	NA	NA	NA	NA	NA	NA	NA	NA	NA	intronic	SGK1
9	73499198	4.56155e-07	NA	NA	NA	NA	NA	NA	NA	NA	NA	NA	NA	NA	NA	NA	intronic	AHI1
9	75249433	NA	NA	NA	NA	NA	NA	NA	NA	NA	NA	NA	NA	NA	7.07672e-08	NA	intergenic	IFNGR1,TRNAC-GCA
9	76013004	1.99571e-08	NA	NA	NA	NA	NA	NA	NA	NA	NA	NA	NA	NA	NA	NA	intronic	ARFGEF3
9	76023352	4.68952e-08	NA	NA	NA	NA	NA	NA	NA	NA	NA	NA	NA	NA	NA	NA	intronic	ARFGEF3
9	76209389	5.51356e-09	NA	NA	NA	NA	NA	NA	NA	NA	NA	NA	NA	NA	NA	NA	intronic	NHSL1
9	83833106	NA	NA	NA	NA	NA	NA	NA	NA	NA	NA	NA	NA	NA	4.89592e-07	NA	intronic	RAB32
9	84868844	NA	NA	NA	NA	NA	NA	NA	NA	NA	NA	NA	NA	NA	4.40422e-07	NA	intronic	SAMD5
9	84868845	NA	NA	NA	NA	NA	NA	NA	NA	NA	NA	NA	NA	NA	4.40422e-07	NA	intronic	SAMD5
9	91868086	6.20285e-07	NA	NA	NA	NA	NA	NA	NA	NA	NA	NA	NA	NA	NA	NA	intronic	TFB1M,TIAM2
9	91868124	4.53376e-08	NA	NA	NA	NA	NA	NA	NA	NA	NA	NA	NA	NA	NA	NA	intronic	TFB1M,TIAM2
9	94396576	NA	NA	NA	NA	NA	NA	NA	NA	NA	NA	NA	NA	7.74158e-07	NA	NA	intergenic	ZDHHC14,SNX9
9	95300892	4.91664e-07	NA	NA	NA	NA	NA	NA	NA	NA	NA	NA	NA	NA	NA	NA	intronic	RSPH3
9	96892968	NA	NA	NA	NA	NA	NA	NA	NA	NA	NA	NA	2.98019e-07	NA	NA	NA	intronic	AGPAT4
9	97449948	NA	NA	NA	6.04205e-09	8.93179e-08	7.18292e-08	NA	NA	NA	NA	NA	NA	NA	NA	NA	intronic	PRKN
9	98193670	NA	NA	NA	NA	2.05393e-07	NA	NA	NA	NA	NA	NA	NA	NA	NA	NA	intronic	PACRG
9	104404484	NA	NA	NA	8.52659e-08	7.14299e-09	1.03818e-07	NA	NA	NA	5.49847e-08	1.03958e-07	NA	NA	NA	2.78645e-07	intergenic	LOC100301320,LOC100301231
9	104427346	NA	NA	NA	NA	5.46815e-07	NA	NA	NA	NA	NA	NA	NA	NA	NA	NA	intergenic	LOC100301231,TRNAY-GUA
9	104427585	NA	NA	NA	NA	2.7956e-08	4.11383e-07	NA	NA	NA	1.59124e-07	4.26738e-07	NA	NA	NA	NA	intergenic	LOC100301231,TRNAY-GUA
9	104427876	NA	1.03511e-10	2.49624e-07	2.53414e-08	3.47264e-10	7.72106e-10	NA	NA	NA	3.10855e-09	8.03315e-08	NA	NA	NA	7.69517e-08	intergenic	LOC100301231,TRNAY-GUA
9	104427965	NA	4.25832e-09	NA	2.02296e-07	3.57884e-09	9.71033e-09	NA	NA	NA	5.08429e-08	NA	NA	NA	NA	9.47243e-07	intergenic	LOC100301231,TRNAY-GUA
9	104428080	NA	3.61763e-09	NA	NA	1.73905e-08	3.93395e-08	NA	NA	NA	1.46659e-07	NA	NA	NA	NA	NA	intergenic	LOC100301231,TRNAY-GUA
9	104428207	NA	NA	NA	NA	7.84559e-08	NA	NA	NA	NA	9.51131e-09	1.41602e-07	NA	NA	NA	9.96836e-07	intergenic	LOC100301231,TRNAY-GUA
9	104428263	NA	6.46154e-07	NA	3.12546e-07	4.55836e-09	5.5041e-08	NA	NA	NA	1.01117e-08	1.45131e-08	NA	NA	NA	5.58445e-07	intergenic	LOC100301231,TRNAY-GUA
9	104428286	NA	9.21024e-07	NA	4.58625e-07	7.63638e-09	8.36625e-08	NA	NA	NA	1.7685e-08	2.29729e-08	NA	NA	NA	8.04211e-07	intergenic	LOC100301231,TRNAY-GUA
9	104430449	NA	NA	NA	5.72577e-08	4.50231e-08	6.74532e-07	NA	NA	NA	1.47204e-07	1.94366e-07	2.44846e-07	NA	NA	5.31272e-07	intergenic	LOC100301231,TRNAY-GUA
9	104431218	NA	NA	NA	NA	NA	NA	NA	NA	NA	9.53925e-07	NA	NA	NA	NA	NA	intergenic	LOC100301231,TRNAY-GUA
9	104432819	NA	1.66247e-07	NA	NA	NA	NA	NA	NA	NA	NA	NA	NA	NA	NA	NA	intergenic	LOC100301231,TRNAY-GUA
10	1818774	7.01725e-07	NA	NA	NA	NA	NA	NA	NA	NA	NA	NA	NA	NA	NA	NA	intergenic	EPB41L4A,NREP
10	1826598	6.5729e-08	NA	NA	NA	NA	NA	NA	NA	NA	NA	NA	NA	NA	NA	NA	intergenic	EPB41L4A,NREP
10	2882843	NA	NA	NA	NA	NA	NA	NA	NA	NA	NA	NA	NA	NA	2.0437e-07	NA	intergenic	LOC104973030,KCNN2
10	2882866	NA	NA	NA	NA	NA	NA	NA	NA	NA	NA	NA	NA	NA	2.59876e-07	NA	intergenic	LOC104973030,KCNN2
10	6045175	6.67237e-07	NA	NA	NA	NA	NA	NA	NA	NA	NA	NA	NA	NA	NA	NA	intergenic	DRD1,GCNT4
10	7068554	3.06123e-07	NA	NA	NA	NA	NA	NA	NA	NA	NA	NA	NA	NA	NA	NA	intronic	ANKDD1B
10	7441746	NA	NA	NA	NA	NA	NA	NA	NA	NA	NA	NA	NA	NA	4.18632e-09	NA	intronic	SV2C
10	8485114	2.36223e-07	NA	NA	NA	NA	NA	NA	NA	NA	NA	NA	NA	NA	NA	NA	intronic	PDE8B
10	8955649	NA	3.21772e-07	5.80207e-07	2.6746e-07	5.50502e-07	7.25111e-08	NA	NA	NA	NA	NA	NA	NA	NA	NA	intergenic	LOC512323,AP3B1
10	9025247	NA	NA	NA	NA	1.98312e-07	NA	NA	NA	NA	1.11653e-07	4.86479e-08	NA	NA	NA	NA	intergenic	LOC512323,AP3B1
10	9026819	NA	5.7523e-07	5.47949e-08	1.66949e-07	2.32018e-08	2.72297e-08	NA	NA	NA	1.32927e-07	6.02631e-07	NA	NA	NA	5.29759e-07	intergenic	LOC512323,AP3B1
10	9565222	NA	7.68539e-07	NA	NA	NA	NA	NA	NA	NA	NA	NA	NA	NA	NA	NA	intronic	LHFPL2
10	9679430	NA	7.88941e-09	9.62372e-09	NA	NA	2.29294e-07	NA	NA	NA	NA	NA	NA	NA	NA	NA	intronic	LHFPL2
10	11293518	2.80637e-07	NA	NA	NA	NA	NA	NA	NA	NA	NA	NA	NA	NA	NA	NA	intergenic	SERINC5,STYX
10	12080914	NA	NA	NA	9.47593e-08	NA	NA	NA	NA	NA	NA	NA	NA	NA	NA	NA	intronic	PDCD7
10	12080930	NA	NA	NA	1.42155e-08	3.16548e-08	8.12334e-08	NA	NA	NA	NA	NA	NA	NA	NA	NA	intronic	PDCD7
10	12087179	NA	9.95572e-07	3.83218e-08	8.00181e-07	NA	2.52348e-07	NA	NA	NA	NA	NA	NA	NA	NA	NA	intergenic	PDCD7,CLPX
10	12099828	NA	4.73411e-07	8.15807e-07	3.61738e-07	1.22753e-07	1.16872e-07	NA	NA	NA	NA	NA	NA	NA	NA	NA	intronic	CLPX
10	12099829	NA	4.73411e-07	8.15807e-07	3.61738e-07	1.22753e-07	1.16872e-07	NA	NA	NA	NA	NA	NA	NA	NA	NA	intronic	CLPX
10	12156483	NA	3.85441e-08	5.379e-08	9.7021e-08	1.05051e-08	1.52497e-08	NA	NA	NA	3.19e-07	NA	NA	NA	NA	NA	intronic	CILP
10	12161144	NA	3.45012e-07	NA	NA	NA	NA	NA	NA	NA	NA	NA	NA	NA	NA	NA	intronic	CILP
10	12241696	6.46436e-07	NA	NA	NA	NA	NA	NA	NA	NA	NA	NA	NA	NA	NA	NA	intergenic	PARP16,IGDCC3
10	13067639	NA	NA	2.13423e-07	1.18709e-07	NA	7.83494e-07	NA	NA	NA	NA	NA	NA	NA	NA	NA	intronic	MEGF11
10	18636842	NA	NA	NA	NA	NA	NA	NA	NA	NA	NA	NA	NA	NA	9.48405e-08	NA	intergenic	THSD4,NR2E3
10	20013996	NA	NA	NA	6.87027e-08	NA	4.4167e-07	NA	NA	NA	NA	NA	NA	NA	NA	NA	intronic	NEO1
10	22564347	4.38876e-07	NA	NA	NA	NA	NA	NA	NA	NA	NA	NA	NA	NA	NA	NA	intronic	LOC100336282
10	23406679	6.73686e-07	NA	NA	NA	NA	NA	NA	NA	NA	NA	NA	NA	NA	NA	NA	intergenic	LOC101906952,LOC407203
10	25522261	NA	9.76036e-07	NA	5.05631e-07	NA	8.32547e-07	NA	NA	NA	NA	NA	NA	NA	NA	NA	intergenic	LOC100296412,LOC522609
10	26513376	NA	1.01984e-07	NA	3.3931e-09	NA	5.21021e-08	NA	NA	NA	NA	NA	NA	NA	NA	NA	downstream	RNASE11
10	26529257	NA	NA	NA	9.67111e-07	NA	NA	NA	NA	NA	NA	NA	NA	NA	NA	NA	intergenic	RNASE11,RNASE10
10	27642440	NA	NA	NA	NA	NA	NA	NA	NA	9.44677e-07	NA	NA	NA	NA	NA	NA	intergenic	LOC781843,LOC100140382
10	27670519	NA	6.92243e-07	NA	NA	NA	NA	NA	NA	NA	NA	NA	NA	NA	NA	NA	intergenic	LOC781758,LOC781713
10	28749027	2.14825e-07	NA	NA	NA	NA	NA	NA	NA	NA	NA	NA	NA	NA	NA	NA	intronic	RYR3
10	29248581	NA	6.87352e-07	NA	NA	NA	NA	NA	NA	NA	NA	NA	NA	NA	NA	NA	intronic	RYR3
10	32640545	NA	NA	NA	NA	NA	NA	NA	NA	NA	NA	9.00727e-07	NA	NA	NA	NA	intronic	MEIS2
10	33253199	3.99853e-09	NA	NA	NA	NA	NA	NA	NA	NA	NA	NA	NA	NA	NA	NA	intergenic	MEIS2,TMCO5A
10	34214918	3.64382e-07	NA	NA	NA	NA	NA	NA	NA	NA	NA	NA	NA	NA	NA	NA	intronic	RASGRP1
10	34710605	NA	7.3396e-07	NA	NA	NA	NA	NA	NA	NA	NA	NA	NA	NA	NA	NA	intergenic	RASGRP1,THBS1
10	35932254	NA	NA	NA	NA	NA	NA	NA	NA	NA	NA	NA	NA	NA	NA	6.21064e-07	intergenic	PLCB2,INAFM2
10	37482542	5.51501e-07	NA	NA	NA	NA	NA	NA	NA	NA	NA	NA	NA	NA	NA	NA	intergenic	PLA2G4E,PLA2G4D
10	37500625	3.33936e-07	NA	NA	NA	NA	NA	NA	NA	NA	NA	NA	NA	NA	NA	NA	intronic	PLA2G4D
10	37646593	6.2847e-08	NA	NA	NA	NA	NA	NA	NA	NA	NA	NA	NA	NA	NA	NA	intronic	GANC
10	38105834	1.80541e-07	NA	NA	NA	NA	NA	NA	NA	NA	NA	NA	NA	NA	NA	NA	intronic	TTBK2
10	38113155	2.31499e-07	NA	NA	NA	NA	NA	NA	NA	NA	NA	NA	NA	NA	NA	NA	intronic	TTBK2
10	38127273	3.98812e-10	NA	NA	NA	NA	NA	NA	NA	NA	NA	NA	NA	NA	NA	NA	intronic	TTBK2
10	38132496	1.95248e-09	NA	NA	NA	NA	NA	NA	NA	NA	NA	NA	NA	NA	NA	NA	intronic	TTBK2
10	38195757	9.72066e-07	NA	NA	NA	NA	NA	NA	NA	NA	NA	NA	NA	NA	NA	NA	intronic	UBR1
10	38231945	9.96814e-08	NA	NA	NA	NA	NA	NA	NA	NA	NA	NA	NA	NA	NA	NA	intronic	UBR1
10	38254713	1.81173e-08	NA	NA	NA	NA	NA	NA	NA	NA	NA	NA	NA	NA	NA	NA	intronic	UBR1
10	38254720	1.75631e-08	NA	NA	NA	NA	NA	NA	NA	NA	NA	NA	NA	NA	NA	NA	intronic	UBR1
10	38419097	NA	7.48206e-08	NA	NA	NA	NA	NA	NA	NA	NA	NA	NA	NA	NA	NA	intronic	EPB42
10	38665097	NA	NA	NA	6.52594e-08	1.14983e-08	1.78834e-07	NA	NA	NA	9.19893e-09	2.11197e-10	NA	NA	NA	1.42403e-08	intergenic	EPB42,RPL10L
10	38670588	NA	NA	NA	7.176e-11	1.84814e-11	6.56958e-10	NA	NA	NA	1.33449e-09	2.56284e-11	NA	NA	NA	5.72806e-09	intergenic	EPB42,RPL10L
10	38674684	NA	NA	NA	9.82175e-07	9.88776e-07	NA	NA	NA	NA	NA	NA	NA	NA	NA	NA	intergenic	EPB42,RPL10L
10	38691007	NA	NA	NA	NA	NA	NA	NA	NA	NA	5.31022e-07	8.29297e-09	NA	NA	NA	3.14574e-07	intergenic	EPB42,RPL10L
10	38691081	NA	NA	NA	1.2344e-08	2.39171e-08	1.3198e-07	NA	NA	NA	5.79375e-07	9.27252e-09	NA	NA	NA	1.87881e-07	intergenic	EPB42,RPL10L
10	38696013	NA	NA	NA	NA	NA	NA	NA	NA	NA	NA	4.19328e-07	NA	NA	NA	NA	intergenic	EPB42,RPL10L
10	38696384	NA	NA	NA	9.0898e-07	2.03813e-07	NA	NA	NA	NA	2.50762e-07	2.33299e-08	NA	NA	NA	2.43024e-07	intergenic	EPB42,RPL10L
10	38698347	NA	NA	NA	3.8814e-07	NA	NA	NA	NA	NA	NA	1.43534e-07	NA	NA	NA	NA	intergenic	EPB42,RPL10L
10	38698589	NA	NA	NA	6.64659e-07	NA	NA	NA	NA	NA	NA	NA	NA	NA	NA	NA	intergenic	EPB42,RPL10L
10	38948197	NA	8.9105e-07	4.55608e-07	1.39059e-08	NA	2.03324e-07	NA	NA	NA	NA	NA	NA	NA	NA	NA	intergenic	EPB42,RPL10L
10	39125659	NA	NA	NA	1.41508e-07	NA	6.10396e-07	NA	NA	NA	NA	NA	NA	NA	NA	NA	intergenic	EPB42,RPL10L
10	39205883	NA	NA	NA	1.15214e-07	1.05436e-07	9.00738e-07	NA	NA	NA	NA	2.90545e-07	NA	NA	NA	NA	intergenic	EPB42,RPL10L
10	39256420	NA	NA	NA	3.24442e-07	NA	NA	NA	NA	NA	NA	NA	NA	NA	NA	NA	intergenic	EPB42,RPL10L
10	39286659	NA	1.48036e-10	2.00645e-07	3.24724e-09	9.34404e-09	4.01654e-10	NA	NA	NA	3.5694e-08	3.88313e-09	NA	NA	NA	2.31254e-07	intergenic	EPB42,RPL10L
10	39286694	NA	NA	NA	2.92487e-08	2.70284e-08	2.83882e-08	NA	NA	NA	9.31405e-08	1.66041e-09	NA	NA	NA	NA	intergenic	EPB42,RPL10L
10	39332090	NA	NA	NA	7.53889e-07	NA	NA	NA	NA	NA	NA	NA	NA	NA	NA	NA	intergenic	EPB42,RPL10L
10	39335010	NA	NA	NA	NA	5.66639e-07	NA	NA	NA	NA	NA	9.9061e-07	NA	NA	NA	NA	intergenic	EPB42,RPL10L
10	39340378	NA	NA	NA	NA	9.1929e-07	NA	NA	NA	NA	NA	NA	NA	NA	NA	NA	intergenic	EPB42,RPL10L
10	39389788	NA	NA	NA	NA	6.24819e-08	NA	NA	NA	NA	NA	8.95222e-08	NA	NA	NA	NA	intergenic	EPB42,RPL10L
10	39418893	NA	NA	NA	3.5055e-07	NA	NA	NA	NA	NA	NA	7.105e-07	NA	NA	NA	NA	intergenic	EPB42,RPL10L
10	39429257	NA	NA	NA	NA	1.24742e-07	NA	NA	NA	NA	NA	7.55867e-07	NA	NA	NA	NA	intergenic	EPB42,RPL10L
10	40050655	NA	NA	NA	1.94148e-08	3.04686e-08	1.89876e-07	NA	NA	NA	2.86853e-07	8.52693e-08	NA	NA	NA	NA	intronic	MDGA2
10	42368448	NA	NA	7.58785e-07	NA	NA	NA	NA	NA	NA	NA	NA	NA	NA	NA	NA	intergenic	MDGA2,RPS29
10	43317493	NA	6.06866e-08	1.82672e-07	6.70376e-07	9.59036e-07	9.08432e-08	NA	NA	NA	NA	NA	NA	NA	NA	NA	intronic	MAP4K5
10	43376109	NA	2.88245e-08	1.17492e-07	5.93336e-08	1.19955e-07	1.68672e-08	NA	NA	NA	NA	3.82259e-07	NA	NA	NA	4.3467e-07	intronic	MAP4K5
10	44270832	NA	NA	NA	NA	NA	NA	NA	NA	NA	NA	8.86986e-07	NA	NA	NA	NA	intergenic	TMX1,FRMD6
10	47024236	1.90019e-07	NA	NA	NA	NA	NA	NA	NA	NA	NA	NA	NA	NA	NA	NA	intergenic	TPM1,TLN2
10	47168619	3.63775e-07	NA	NA	NA	NA	NA	NA	NA	NA	NA	NA	NA	NA	NA	NA	intergenic	TPM1,TLN2
10	47186565	7.3552e-09	NA	NA	NA	NA	NA	NA	NA	NA	NA	NA	NA	NA	NA	NA	intergenic	TPM1,TLN2
10	47217916	NA	1.21009e-08	2.46157e-08	4.42667e-07	NA	2.51102e-07	NA	NA	NA	NA	NA	NA	NA	NA	NA	intergenic	TPM1,TLN2
10	47604915	NA	NA	NA	NA	NA	NA	NA	NA	8.89961e-07	NA	NA	NA	NA	NA	NA	intronic	TLN2
10	52893653	NA	NA	NA	6.24001e-08	3.60841e-07	2.22675e-07	NA	NA	NA	NA	NA	NA	NA	NA	NA	intronic	CGNL1
10	56761876	2.79483e-08	NA	NA	NA	NA	NA	NA	NA	NA	NA	NA	NA	NA	NA	NA	intronic	WDR72
10	56761970	2.86379e-08	NA	NA	NA	NA	NA	NA	NA	NA	NA	NA	NA	NA	NA	NA	intronic	WDR72
10	60843198	NA	NA	NA	8.89763e-07	NA	NA	NA	NA	NA	NA	NA	NA	NA	NA	NA	intronic	FAM227B,FGF7
10	60934766	NA	1.03152e-07	NA	NA	NA	NA	NA	NA	NA	NA	NA	NA	NA	NA	NA	intronic	GALK2
10	61129054	NA	1.25226e-08	3.2801e-07	NA	NA	5.30119e-07	NA	NA	NA	NA	NA	NA	NA	NA	NA	intergenic	COPS2,SECISBP2L
10	61130638	NA	NA	NA	NA	NA	NA	NA	2.54792e-07	NA	NA	NA	NA	NA	NA	NA	intergenic	COPS2,SECISBP2L
10	61451748	NA	NA	NA	NA	NA	NA	NA	NA	9.45579e-07	NA	NA	NA	NA	NA	NA	intronic	CEP152
10	63911271	NA	4.40399e-07	NA	NA	NA	NA	NA	NA	NA	NA	NA	NA	NA	NA	NA	intergenic	SEMA6D,SQOR
10	66428222	NA	NA	NA	NA	NA	NA	NA	NA	NA	NA	8.29255e-07	NA	NA	NA	NA	intergenic	DDHD1,BMP4
10	67940288	NA	7.31999e-07	1.76372e-07	NA	NA	NA	NA	NA	NA	NA	NA	NA	NA	NA	NA	intergenic	TBPL2,KTN1
10	70232522	NA	NA	6.79365e-07	NA	NA	NA	NA	NA	NA	NA	NA	NA	NA	NA	NA	intergenic	SLC35F4,ARMH4
10	71159804	NA	NA	4.3397e-07	NA	NA	NA	NA	NA	NA	NA	NA	NA	NA	NA	NA	intergenic	DACT1,LOC112448581
10	71824112	NA	2.69121e-07	NA	1.20164e-07	3.87077e-07	2.28598e-07	NA	NA	NA	NA	NA	NA	NA	NA	NA	intronic	CCDC175
10	72717467	NA	5.54988e-08	7.91926e-08	5.95439e-08	NA	1.21626e-07	NA	NA	NA	NA	NA	NA	NA	NA	NA	intergenic	SIX6,SIX1
10	77816785	NA	NA	9.16984e-07	NA	NA	NA	NA	NA	NA	NA	NA	NA	NA	NA	NA	intronic	FUT8
10	77940254	NA	NA	NA	NA	NA	NA	NA	NA	NA	5.12305e-07	7.03129e-07	NA	NA	NA	4.52259e-07	intergenic	FUT8,TRNAR-CCU
10	78049398	NA	NA	7.05952e-07	NA	NA	NA	NA	NA	NA	NA	NA	NA	NA	NA	NA	intergenic	FUT8,TRNAR-CCU
10	78052521	NA	4.92429e-07	8.63491e-08	NA	NA	NA	NA	NA	NA	NA	NA	NA	NA	NA	NA	intergenic	FUT8,TRNAR-CCU
10	84307167	NA	6.44992e-07	NA	NA	NA	NA	NA	NA	NA	NA	NA	NA	NA	NA	NA	intronic	DPF3
10	86664577	4.58085e-07	NA	NA	NA	NA	NA	NA	NA	NA	NA	NA	NA	NA	NA	NA	intergenic	JDP2,BATF
10	93090486	NA	NA	NA	NA	NA	NA	NA	NA	NA	NA	NA	NA	NA	1.88465e-07	NA	intergenic	TRNAK-CUU,LOC112448582
10	93177981	NA	NA	1.97092e-07	2.97686e-07	NA	9.38061e-07	NA	NA	NA	NA	NA	NA	NA	NA	NA	intergenic	TRNAK-CUU,LOC112448582
10	93178651	NA	4.08429e-07	3.18568e-08	NA	NA	NA	NA	NA	NA	NA	NA	NA	NA	NA	NA	intergenic	TRNAK-CUU,LOC112448582
10	94689262	NA	NA	8.20839e-07	NA	NA	NA	NA	NA	NA	NA	NA	NA	NA	NA	NA	intergenic	LOC100140640,MIR2293
10	95894132	NA	NA	2.34987e-07	4.03827e-07	NA	NA	NA	NA	NA	NA	NA	NA	NA	NA	NA	intergenic	LOC100140640,MIR2293
10	95975707	8.48341e-08	NA	NA	NA	NA	NA	NA	NA	NA	NA	NA	NA	NA	NA	NA	intergenic	LOC100140640,MIR2293
10	97185625	NA	NA	6.54172e-07	NA	NA	NA	NA	NA	NA	NA	NA	NA	NA	NA	NA	intronic	FLRT2
10	97201556	NA	NA	2.73274e-07	NA	NA	NA	NA	NA	NA	NA	NA	NA	NA	NA	NA	intronic	FLRT2
11	6277482	NA	5.8707e-07	NA	NA	NA	NA	NA	NA	NA	NA	NA	NA	NA	NA	NA	downstream	RFX8
11	6291971	NA	9.26981e-07	NA	NA	NA	NA	NA	NA	NA	NA	NA	NA	NA	NA	NA	intronic	RFX8
11	8183720	NA	2.79889e-07	NA	NA	NA	NA	NA	NA	NA	NA	NA	NA	NA	NA	NA	intergenic	TMEM182,POU3F3
11	9523216	NA	3.49469e-07	NA	NA	NA	NA	NA	NA	NA	NA	NA	NA	NA	NA	NA	intronic	TACR1
11	10338231	NA	NA	9.61718e-07	7.18217e-07	NA	NA	NA	NA	NA	NA	NA	NA	NA	NA	NA	intronic	SLC4A5
11	12651161	NA	9.08186e-07	NA	NA	NA	NA	NA	NA	NA	NA	NA	NA	NA	NA	NA	intergenic	CYP26B1,DYSF
11	15407701	NA	NA	NA	5.53654e-07	NA	NA	NA	NA	NA	NA	NA	NA	NA	NA	NA	intergenic	TTC27,LTBP1
11	15551738	NA	1.66819e-07	5.48811e-08	6.13226e-07	NA	5.20292e-07	NA	NA	NA	NA	NA	NA	NA	NA	NA	intronic	LTBP1
11	15551741	NA	1.75006e-07	6.56629e-08	7.87982e-07	NA	6.43847e-07	NA	NA	NA	NA	NA	NA	NA	NA	NA	intronic	LTBP1
11	15560533	NA	NA	NA	7.74292e-07	NA	NA	NA	NA	NA	NA	NA	NA	NA	NA	NA	intronic	LTBP1
11	18032919	NA	4.32774e-07	NA	NA	NA	NA	NA	NA	NA	NA	NA	NA	NA	NA	NA	intergenic	FAM98A,TRNAM-CAU
11	18091183	NA	6.33167e-08	NA	3.41248e-07	NA	5.90227e-07	NA	NA	NA	NA	NA	NA	NA	NA	NA	intergenic	FAM98A,TRNAM-CAU
11	19201559	NA	4.00601e-07	8.13587e-07	NA	NA	NA	NA	NA	NA	NA	NA	NA	NA	NA	NA	intronic	VIT
11	20472826	NA	NA	1.33244e-07	NA	NA	NA	NA	NA	NA	NA	NA	NA	NA	NA	NA	intronic	CYP1B1
11	21505465	NA	NA	9.53093e-07	NA	NA	NA	NA	NA	NA	NA	NA	NA	NA	NA	NA	intronic	CDKL4
11	22011747	NA	2.44476e-07	9.1799e-08	1.58397e-07	NA	2.70732e-07	NA	NA	NA	NA	NA	NA	NA	NA	NA	intronic	TMEM178A
11	22011809	NA	1.38456e-08	8.80965e-09	1.6835e-08	7.65442e-07	2.8752e-08	NA	NA	NA	NA	NA	NA	NA	NA	5.28583e-08	intronic	TMEM178A
11	22025060	NA	NA	NA	6.53137e-07	NA	NA	NA	NA	NA	NA	NA	NA	NA	NA	NA	intergenic	TMEM178A,THUMPD2
11	22036456	NA	5.20463e-07	NA	5.78405e-07	NA	NA	NA	NA	NA	NA	NA	NA	NA	NA	NA	intergenic	TMEM178A,THUMPD2
11	22776910	6.11101e-08	NA	NA	NA	NA	NA	NA	NA	NA	NA	NA	NA	NA	NA	NA	intronic	SLC8A1
11	23450042	NA	NA	NA	6.11535e-07	NA	NA	NA	NA	NA	NA	NA	NA	NA	NA	NA	intergenic	SLC8A1,PKDCC
11	23542759	NA	NA	NA	2.00684e-07	NA	NA	NA	NA	NA	NA	NA	NA	NA	NA	NA	intergenic	SLC8A1,PKDCC
11	23542783	NA	NA	NA	7.05514e-07	NA	NA	NA	NA	NA	NA	NA	NA	NA	NA	NA	intergenic	SLC8A1,PKDCC
11	30809370	NA	4.68668e-07	2.75179e-07	NA	NA	NA	NA	NA	NA	NA	NA	NA	NA	NA	NA	intronic	PPP1R21
11	31510823	NA	NA	NA	3.01301e-07	NA	NA	NA	NA	NA	NA	NA	NA	NA	NA	NA	intergenic	FSHR,NRXN1
11	32074388	NA	NA	NA	9.21771e-09	8.67015e-07	1.87341e-07	NA	NA	NA	NA	NA	NA	NA	NA	NA	intergenic	FSHR,NRXN1
11	32074423	NA	NA	NA	6.05437e-07	NA	NA	NA	NA	NA	NA	NA	NA	NA	NA	NA	intergenic	FSHR,NRXN1
11	32080305	NA	NA	NA	4.03441e-07	NA	NA	NA	NA	NA	NA	NA	NA	NA	NA	NA	intergenic	FSHR,NRXN1
11	32081537	NA	NA	NA	4.05193e-08	NA	5.49661e-07	NA	NA	NA	NA	NA	NA	NA	NA	NA	intergenic	FSHR,NRXN1
11	33847158	NA	NA	NA	4.58747e-07	NA	NA	NA	NA	NA	NA	NA	NA	NA	NA	NA	intergenic	TRNAH-GUG,NONE
11	35212923	9.27741e-08	NA	NA	NA	NA	NA	NA	NA	NA	NA	NA	NA	NA	NA	NA	intergenic	TRNAH-GUG,ASB3
11	35236527	6.72997e-09	NA	NA	NA	NA	NA	NA	NA	NA	NA	NA	NA	NA	NA	NA	intergenic	TRNAH-GUG,ASB3
11	35251268	6.25004e-09	NA	NA	NA	NA	NA	NA	NA	NA	NA	NA	NA	NA	NA	NA	intergenic	TRNAH-GUG,ASB3
11	35497834	NA	NA	NA	8.35831e-07	NA	NA	NA	NA	NA	NA	NA	NA	NA	NA	NA	intergenic	TRNAH-GUG,ASB3
11	47778388	NA	NA	NA	4.07461e-07	NA	NA	NA	NA	NA	NA	NA	NA	NA	NA	NA	intergenic	FOXI3,THNSL2
11	49854640	NA	7.595e-09	NA	6.15902e-08	1.30747e-07	1.39388e-08	NA	NA	NA	9.72849e-07	1.50309e-07	NA	NA	NA	NA	intronic	TCF7L1
11	49854662	NA	1.1046e-08	NA	1.2128e-07	2.54001e-07	2.59569e-08	NA	NA	NA	NA	2.9748e-07	NA	NA	NA	NA	intronic	TCF7L1
11	50329170	NA	7.68055e-07	NA	NA	NA	NA	NA	NA	NA	NA	NA	NA	NA	NA	NA	intronic	DNAH6
11	50345421	NA	2.04517e-07	NA	NA	NA	NA	NA	2.63878e-07	NA	NA	NA	NA	NA	NA	3.66471e-07	intronic	DNAH6
11	50677678	NA	3.68825e-07	NA	NA	NA	NA	NA	NA	NA	NA	NA	NA	NA	NA	NA	intergenic	SUCLG1,NONE
11	51909932	NA	NA	NA	9.36961e-07	NA	NA	NA	NA	NA	NA	NA	NA	NA	NA	NA	intergenic	SUCLG1,NONE
11	51910501	NA	NA	NA	9.24985e-07	NA	NA	NA	NA	NA	NA	NA	NA	NA	NA	NA	intergenic	SUCLG1,NONE
11	51933466	NA	NA	NA	4.48998e-07	4.16563e-07	NA	NA	NA	NA	NA	1.7154e-07	NA	NA	NA	NA	intergenic	SUCLG1,NONE
11	52016131	NA	NA	NA	2.25429e-07	NA	9.46274e-07	NA	NA	NA	NA	NA	NA	NA	NA	NA	intergenic	SUCLG1,NONE
11	52965467	NA	NA	NA	NA	NA	NA	NA	NA	NA	NA	NA	NA	NA	1.92339e-08	NA	intergenic	NONE,CTNNA2
11	53015665	NA	NA	NA	NA	NA	NA	NA	NA	NA	NA	NA	NA	NA	2.80666e-07	NA	intergenic	NONE,CTNNA2
11	53392812	NA	NA	1.33815e-07	8.72643e-07	NA	NA	NA	NA	NA	NA	NA	NA	NA	NA	NA	intergenic	NONE,CTNNA2
11	53584141	NA	NA	NA	6.20068e-07	NA	4.74497e-07	NA	NA	NA	NA	NA	NA	NA	NA	NA	intergenic	NONE,CTNNA2
11	54130145	NA	1.90855e-07	NA	NA	NA	NA	NA	NA	NA	NA	NA	NA	NA	NA	NA	intergenic	NONE,CTNNA2
11	54132174	NA	1.17417e-09	2.78357e-07	NA	NA	8.22849e-07	NA	NA	NA	NA	NA	NA	NA	NA	NA	intergenic	NONE,CTNNA2
11	54171570	NA	1.53565e-07	NA	NA	NA	NA	NA	NA	NA	NA	NA	NA	NA	NA	NA	intergenic	NONE,CTNNA2
11	54172271	NA	5.17942e-07	NA	NA	NA	NA	NA	NA	NA	NA	NA	NA	NA	NA	NA	intergenic	NONE,CTNNA2
11	54173908	NA	1.48948e-07	NA	NA	NA	NA	NA	NA	NA	NA	NA	NA	NA	NA	NA	intergenic	NONE,CTNNA2
11	54177095	NA	9.20552e-07	NA	NA	NA	NA	NA	NA	NA	NA	NA	NA	NA	NA	NA	intergenic	NONE,CTNNA2
11	54181390	NA	1.00294e-07	NA	NA	NA	NA	NA	NA	NA	NA	NA	NA	NA	NA	NA	intergenic	NONE,CTNNA2
11	54181768	NA	4.68637e-08	NA	NA	NA	NA	NA	NA	NA	NA	NA	NA	NA	NA	NA	intergenic	NONE,CTNNA2
11	54181802	NA	5.94904e-07	NA	NA	NA	NA	NA	NA	NA	NA	NA	NA	NA	NA	NA	intergenic	NONE,CTNNA2
11	54201256	NA	8.83104e-07	NA	NA	NA	NA	NA	NA	NA	NA	NA	NA	NA	NA	NA	intergenic	NONE,CTNNA2
11	54201328	NA	8.79953e-07	NA	NA	NA	NA	NA	NA	NA	NA	NA	NA	NA	NA	NA	intergenic	NONE,CTNNA2
11	54204877	NA	6.16363e-07	NA	NA	NA	NA	NA	NA	NA	NA	NA	NA	NA	NA	NA	intergenic	NONE,CTNNA2
11	54211768	NA	2.14231e-07	NA	NA	NA	NA	NA	NA	NA	NA	NA	NA	NA	NA	NA	intergenic	NONE,CTNNA2
11	54693778	NA	NA	NA	8.9857e-07	NA	NA	NA	NA	NA	NA	NA	NA	NA	NA	NA	intergenic	NONE,CTNNA2
11	54783449	NA	NA	NA	6.6524e-07	NA	NA	NA	NA	NA	NA	NA	NA	NA	NA	NA	intergenic	NONE,CTNNA2
11	54888864	NA	NA	NA	NA	NA	NA	NA	NA	NA	NA	NA	NA	NA	1.83666e-09	NA	intronic	CTNNA2
11	55079927	NA	8.34904e-07	NA	NA	NA	NA	NA	NA	NA	NA	NA	NA	NA	NA	NA	intronic	CTNNA2
11	55343666	NA	NA	NA	9.0825e-07	NA	NA	NA	NA	NA	NA	NA	NA	NA	NA	NA	intronic	CTNNA2
11	55531731	NA	NA	NA	NA	NA	NA	NA	NA	NA	NA	NA	NA	NA	7.45823e-07	NA	intronic	CTNNA2
11	56022916	NA	2.58265e-07	NA	5.68956e-08	NA	4.11621e-07	NA	NA	NA	NA	NA	NA	NA	NA	NA	intronic	CTNNA2
11	56123747	NA	1.97043e-07	NA	9.25677e-07	NA	NA	NA	NA	NA	NA	NA	NA	NA	NA	NA	intronic	CTNNA2
11	56268083	NA	4.11599e-08	NA	1.6398e-07	NA	1.88599e-07	NA	NA	NA	NA	NA	NA	NA	NA	NA	intergenic	CTNNA2,LOC107132934
11	56272519	NA	3.99001e-07	NA	NA	NA	NA	NA	NA	NA	NA	NA	NA	NA	NA	NA	intergenic	CTNNA2,LOC107132934
11	56272765	NA	3.77063e-07	NA	NA	NA	7.8274e-07	NA	NA	NA	NA	NA	NA	NA	NA	NA	intergenic	CTNNA2,LOC107132934
11	56274130	NA	2.51056e-07	NA	NA	NA	NA	NA	NA	NA	NA	NA	NA	NA	NA	NA	intergenic	CTNNA2,LOC107132934
11	56274200	NA	8.27524e-07	NA	NA	NA	NA	NA	NA	NA	NA	NA	NA	NA	NA	NA	intergenic	CTNNA2,LOC107132934
11	56275231	NA	4.46096e-07	NA	NA	NA	NA	NA	NA	NA	NA	NA	NA	NA	NA	NA	intergenic	CTNNA2,LOC107132934
11	56276416	NA	5.93866e-07	NA	NA	NA	NA	NA	NA	NA	NA	NA	NA	NA	NA	NA	intergenic	CTNNA2,LOC107132934
11	56276475	NA	2.27783e-07	NA	NA	NA	NA	NA	NA	NA	NA	NA	NA	NA	NA	NA	intergenic	CTNNA2,LOC107132934
11	56280531	NA	3.9958e-07	NA	NA	NA	NA	NA	NA	NA	NA	NA	NA	NA	NA	NA	intergenic	CTNNA2,LOC107132934
11	56280551	NA	1.64719e-07	NA	NA	NA	NA	NA	NA	NA	NA	NA	NA	NA	NA	NA	intergenic	CTNNA2,LOC107132934
11	56281447	NA	4.67422e-10	1.95194e-08	2.32513e-09	NA	8.8642e-09	NA	NA	NA	NA	NA	NA	NA	NA	NA	intergenic	CTNNA2,LOC107132934
11	56288481	NA	7.68196e-07	NA	NA	NA	NA	NA	NA	NA	NA	NA	NA	NA	NA	NA	intergenic	CTNNA2,LOC107132934
11	56316669	NA	5.89054e-08	NA	1.14527e-07	NA	1.73889e-07	NA	NA	NA	NA	NA	NA	NA	NA	NA	intergenic	CTNNA2,LOC107132934
11	56323544	NA	2.01367e-07	NA	NA	NA	NA	NA	NA	NA	NA	NA	NA	NA	NA	NA	intergenic	CTNNA2,LOC107132934
11	56359395	NA	6.45592e-08	NA	9.20799e-07	NA	6.76503e-07	NA	NA	NA	NA	NA	NA	NA	NA	NA	intergenic	CTNNA2,LOC107132934
11	56361840	NA	1.26149e-10	1.39515e-08	5.41343e-09	NA	7.33078e-09	NA	NA	NA	NA	NA	NA	NA	NA	NA	intergenic	CTNNA2,LOC107132934
11	56441608	NA	5.24383e-07	NA	NA	NA	NA	NA	NA	NA	NA	NA	NA	NA	NA	NA	intergenic	CTNNA2,LOC107132934
11	56507222	NA	1.15104e-07	NA	NA	NA	NA	NA	NA	NA	NA	NA	NA	NA	NA	NA	intergenic	CTNNA2,LOC107132934
11	56507248	NA	1.58465e-07	NA	NA	NA	6.7248e-07	NA	NA	NA	NA	NA	NA	NA	NA	NA	intergenic	CTNNA2,LOC107132934
11	56508691	NA	4.03152e-07	NA	5.23338e-07	NA	3.54748e-07	NA	NA	NA	NA	NA	NA	NA	NA	NA	intergenic	CTNNA2,LOC107132934
11	56681417	NA	3.27593e-07	NA	NA	NA	NA	NA	NA	NA	NA	NA	NA	NA	NA	NA	intergenic	REG3G,REG3A
11	56681532	NA	5.36901e-07	NA	NA	NA	NA	NA	NA	NA	NA	NA	NA	NA	NA	NA	intergenic	REG3G,REG3A
11	56724823	NA	6.94516e-09	2.42323e-07	NA	NA	NA	NA	NA	NA	NA	NA	NA	NA	NA	NA	intergenic	REG3A,TRNAC-GCA
11	56725129	NA	4.89857e-08	NA	6.29626e-07	NA	6.32139e-07	NA	NA	NA	NA	NA	NA	NA	NA	NA	intergenic	REG3A,TRNAC-GCA
11	56742964	NA	2.25237e-07	NA	NA	NA	NA	NA	NA	NA	NA	NA	NA	NA	NA	NA	intergenic	REG3A,TRNAC-GCA
11	58261734	NA	7.49076e-07	NA	9.89429e-07	NA	5.42592e-07	NA	NA	NA	NA	NA	NA	NA	NA	NA	intergenic	TRNAC-GCA,LRRTM4
11	58300529	NA	NA	NA	NA	4.33834e-07	NA	NA	NA	NA	4.65684e-07	7.35009e-07	NA	NA	NA	NA	intergenic	TRNAC-GCA,LRRTM4
11	59474857	NA	NA	NA	NA	NA	NA	NA	NA	NA	NA	NA	NA	NA	9.18558e-07	NA	intronic	LRRTM4
11	59848479	NA	NA	NA	NA	NA	NA	NA	NA	NA	NA	NA	NA	NA	5.55269e-08	NA	intronic	AHSA2
11	60954762	NA	4.97665e-08	NA	NA	NA	NA	NA	NA	NA	NA	NA	NA	NA	NA	NA	intergenic	B3GNT2,TMEM17
11	60959674	NA	7.2075e-07	NA	NA	NA	NA	NA	NA	NA	NA	NA	NA	NA	NA	NA	intergenic	B3GNT2,TMEM17
11	62531499	NA	NA	NA	NA	9.44791e-07	NA	NA	NA	NA	NA	NA	NA	NA	NA	NA	intronic	PELI1
11	62535910	NA	5.70489e-07	NA	NA	8.87622e-07	7.39152e-07	NA	NA	NA	NA	NA	NA	NA	NA	NA	intronic	PELI1
11	75464438	1.61268e-08	NA	NA	NA	NA	NA	NA	NA	NA	NA	NA	NA	NA	NA	NA	intronic	KLHL29
11	78758402	NA	NA	NA	5.20661e-07	NA	NA	NA	NA	NA	NA	NA	NA	NA	NA	NA	intergenic	SDC1,LAPTM4A
11	80566674	NA	NA	NA	8.49939e-07	NA	NA	NA	NA	NA	NA	NA	NA	NA	NA	NA	intergenic	RDH14,KCNS3
11	81018101	NA	5.38671e-07	NA	NA	NA	NA	NA	NA	NA	NA	NA	NA	NA	NA	NA	intronic	VSNL1
11	81976179	NA	NA	NA	6.05512e-07	NA	NA	NA	NA	NA	NA	NA	NA	NA	NA	NA	intergenic	FAM49A,MYCN
11	82348190	NA	NA	NA	NA	NA	NA	NA	NA	NA	NA	NA	NA	NA	1.38485e-07	NA	intergenic	FAM49A,MYCN
11	82356485	NA	NA	NA	NA	NA	NA	NA	NA	NA	NA	NA	NA	NA	1.88237e-07	NA	intergenic	FAM49A,MYCN
11	82361360	NA	NA	NA	NA	NA	NA	NA	NA	NA	NA	NA	NA	NA	5.05661e-09	NA	intergenic	FAM49A,MYCN
11	82846220	NA	4.9407e-07	NA	NA	NA	NA	NA	NA	NA	NA	NA	NA	NA	NA	NA	intronic	NBAS
11	85668532	NA	3.32422e-07	NA	NA	NA	NA	NA	NA	NA	NA	NA	NA	NA	NA	NA	intergenic	TRIB2,LPIN1
11	86702847	NA	NA	NA	2.21139e-07	NA	NA	NA	NA	NA	NA	NA	NA	NA	NA	NA	intergenic	C11H2orf50,KCNF1
11	93578243	NA	NA	2.74583e-08	3.97541e-08	NA	3.01709e-07	NA	NA	NA	NA	NA	NA	NA	NA	NA	intergenic	LOC100851523,LOC514546
11	93578264	NA	NA	1.10241e-07	1.58719e-07	NA	9.5454e-07	NA	NA	NA	NA	NA	NA	NA	NA	NA	intergenic	LOC100851523,LOC514546
11	97212673	NA	NA	NA	NA	NA	NA	NA	NA	NA	NA	NA	6.19261e-07	NA	NA	NA	intronic	MVB12B
11	103199821	NA	4.80561e-07	NA	7.60579e-08	NA	3.96565e-07	NA	NA	NA	NA	NA	NA	NA	NA	NA	intergenic	GBGT1,LOC618559
11	104669883	8.11288e-07	NA	NA	NA	NA	NA	NA	NA	NA	NA	NA	NA	NA	NA	NA	intronic	VAV2
12	5065047	4.39559e-07	NA	NA	NA	NA	NA	NA	NA	NA	NA	NA	NA	NA	NA	NA	intergenic	TRNAS-GGA,PCDH17
12	5074313	8.99071e-07	NA	NA	NA	NA	NA	NA	NA	NA	NA	NA	NA	NA	NA	NA	intergenic	TRNAS-GGA,PCDH17
12	5559952	NA	2.84964e-07	NA	NA	NA	NA	NA	NA	NA	NA	NA	NA	NA	NA	NA	intergenic	PCDH17,NONE
12	7590480	NA	NA	NA	2.36235e-07	NA	NA	NA	NA	NA	NA	NA	NA	NA	NA	NA	intergenic	NONE,LOC101905933
12	7590483	NA	NA	NA	2.36235e-07	NA	NA	NA	NA	NA	NA	NA	NA	NA	NA	NA	intergenic	NONE,LOC101905933
12	7649862	NA	NA	NA	1.86087e-07	NA	6.36972e-07	NA	NA	NA	NA	NA	NA	NA	NA	NA	intergenic	NONE,LOC101905933
12	8628260	NA	NA	NA	NA	NA	NA	NA	NA	NA	NA	NA	NA	1.019e-07	NA	NA	intergenic	NONE,LOC101905933
12	9243970	NA	NA	NA	NA	NA	NA	NA	NA	NA	NA	NA	NA	NA	6.66461e-07	NA	intronic	LOC100141168
12	13051015	NA	8.45613e-07	NA	NA	NA	NA	NA	NA	NA	NA	NA	NA	NA	NA	NA	intronic	EPSTI1
12	13535903	NA	NA	3.52627e-07	1.30379e-08	NA	1.62074e-07	NA	NA	NA	NA	NA	NA	NA	NA	NA	intronic	ENOX1
12	14578902	NA	NA	NA	NA	NA	NA	NA	NA	NA	NA	NA	NA	NA	7.13945e-07	NA	intergenic	SMIM2,SERP2
12	15447098	NA	NA	NA	NA	NA	NA	NA	NA	NA	NA	NA	NA	NA	9.04655e-07	NA	intergenic	GTF2F2,TPT1
12	16772827	2.07992e-07	NA	NA	NA	NA	NA	NA	NA	NA	NA	NA	NA	NA	NA	NA	intergenic	ESD,HTR2A
12	16937058	NA	NA	7.47299e-07	3.87967e-07	NA	NA	NA	NA	NA	NA	NA	NA	NA	NA	NA	intergenic	HTR2A,SUCLA2
12	16937060	NA	NA	3.00234e-07	9.30369e-08	NA	7.02837e-07	NA	NA	NA	NA	NA	NA	NA	NA	NA	intergenic	HTR2A,SUCLA2
12	16945378	NA	5.51502e-07	5.57209e-08	NA	NA	NA	NA	NA	NA	NA	NA	NA	NA	NA	NA	intergenic	HTR2A,SUCLA2
12	16949770	5.20981e-07	NA	NA	NA	NA	NA	NA	NA	NA	NA	NA	NA	NA	NA	NA	intergenic	HTR2A,SUCLA2
12	17343700	NA	NA	NA	NA	NA	NA	NA	NA	NA	NA	NA	NA	9.46343e-07	NA	NA	intergenic	HTR2A,SUCLA2
12	17927799	NA	NA	NA	6.37504e-07	4.24767e-07	NA	NA	NA	NA	NA	NA	NA	NA	NA	NA	intronic	MED4
12	18776690	NA	NA	2.94425e-07	6.4541e-07	NA	4.72322e-07	NA	NA	NA	NA	NA	NA	NA	NA	NA	intronic	FNDC3A
12	18782376	NA	3.38057e-09	6.51567e-11	5.90367e-12	2.81562e-08	1.13821e-10	NA	NA	NA	NA	NA	NA	NA	NA	8.63874e-07	intronic	FNDC3A
12	18808825	NA	NA	NA	3.02158e-07	NA	NA	NA	NA	NA	NA	NA	NA	NA	NA	NA	intronic	FNDC3A
12	18808826	NA	NA	NA	3.02158e-07	NA	NA	NA	NA	NA	NA	NA	NA	NA	NA	NA	intronic	FNDC3A
12	18812371	NA	NA	1.86563e-08	1.71738e-07	NA	4.95623e-07	NA	NA	NA	NA	NA	NA	NA	NA	NA	intronic	FNDC3A
12	18867220	NA	NA	6.43439e-07	1.27454e-09	8.72903e-07	1.16356e-07	NA	NA	NA	NA	NA	NA	NA	NA	NA	UTR5	CDADC1
12	18904936	NA	NA	NA	6.50765e-07	4.4893e-07	NA	NA	NA	NA	NA	NA	NA	NA	NA	NA	intergenic	CDADC1,CAB39L
12	18907436	NA	NA	3.78329e-07	1.86151e-08	1.72408e-07	1.86648e-07	NA	NA	NA	NA	NA	NA	NA	NA	NA	intergenic	CDADC1,CAB39L
12	19097212	NA	NA	NA	5.37398e-07	NA	NA	NA	NA	NA	NA	NA	NA	NA	NA	NA	downstream	RCBTB1
12	19101501	NA	NA	NA	5.79433e-07	NA	NA	NA	NA	NA	NA	NA	NA	NA	NA	NA	intronic	RCBTB1
12	19164421	NA	NA	NA	4.59445e-08	9.88479e-08	7.98921e-07	NA	NA	NA	NA	1.07524e-07	NA	NA	NA	NA	intergenic	RCBTB1,ARL11
12	21202069	NA	NA	NA	6.61505e-07	NA	NA	NA	NA	NA	NA	NA	NA	NA	NA	NA	UTR3	WDFY2
12	21360929	NA	NA	NA	NA	9.01957e-07	NA	NA	NA	NA	NA	NA	NA	NA	NA	NA	intronic	ATP7B
12	22216261	NA	NA	NA	5.21743e-08	2.85239e-08	1.50903e-07	NA	NA	NA	NA	5.80394e-07	NA	NA	NA	NA	intergenic	FOXO1,COG6
12	23017772	NA	NA	NA	NA	NA	8.44838e-07	NA	NA	NA	NA	NA	NA	NA	NA	NA	intronic	LHFPL6
12	23241991	NA	NA	NA	1.69836e-07	1.92458e-07	2.69955e-07	NA	NA	NA	NA	NA	NA	NA	NA	NA	intronic	PROSER1
12	23251505	NA	NA	NA	3.11407e-09	1.71425e-09	1.79708e-08	NA	NA	NA	4.09905e-07	4.42445e-08	NA	NA	NA	3.84654e-07	downstream	PROSER1
12	23308719	NA	NA	5.78928e-07	7.51947e-09	3.29199e-09	2.33106e-08	NA	NA	NA	7.4044e-07	3.7438e-07	NA	NA	NA	NA	intronic	FREM2
12	23319648	NA	NA	NA	2.25409e-09	4.8463e-09	1.56849e-08	NA	NA	NA	NA	6.52841e-07	NA	NA	NA	NA	intronic	FREM2
12	23319796	NA	NA	NA	NA	2.03953e-07	NA	NA	NA	NA	NA	NA	NA	NA	NA	NA	intronic	FREM2
12	23330791	NA	NA	NA	NA	6.6041e-07	NA	NA	NA	NA	NA	1.44601e-07	NA	NA	NA	NA	exonic	FREM2
12	23955474	NA	NA	NA	NA	6.36017e-07	NA	NA	NA	NA	NA	NA	NA	NA	NA	NA	intergenic	UFM1,TRPC4
12	23959167	NA	2.55945e-07	9.30376e-07	3.90756e-07	NA	2.88791e-07	NA	NA	NA	NA	NA	NA	NA	NA	NA	intergenic	UFM1,TRPC4
12	25853917	NA	8.30945e-08	3.99449e-07	NA	NA	NA	NA	NA	NA	NA	NA	NA	NA	NA	NA	intronic	NBEA
12	25854013	NA	1.04068e-07	4.04143e-09	6.2362e-09	2.60207e-07	8.20414e-09	NA	NA	NA	NA	NA	NA	NA	NA	5.04389e-07	intronic	NBEA
12	40380521	3.96028e-08	NA	NA	NA	NA	NA	NA	NA	NA	NA	NA	NA	NA	NA	NA	intronic	PCDH9
12	43300132	9.61404e-07	NA	NA	NA	NA	NA	NA	NA	NA	NA	NA	NA	NA	NA	NA	intergenic	NONE,KLHL1
12	43303678	5.17603e-07	NA	NA	NA	NA	NA	NA	NA	NA	NA	NA	NA	NA	NA	NA	intergenic	NONE,KLHL1
12	43397430	2.38953e-08	NA	NA	NA	NA	NA	NA	NA	NA	NA	NA	NA	NA	NA	NA	intergenic	NONE,KLHL1
12	43400400	2.09285e-09	NA	NA	NA	NA	NA	NA	NA	NA	NA	NA	NA	NA	NA	NA	intergenic	NONE,KLHL1
12	43400451	9.92655e-10	NA	NA	NA	NA	NA	NA	NA	NA	NA	NA	NA	NA	NA	NA	intergenic	NONE,KLHL1
12	43430081	9.23886e-09	NA	NA	NA	NA	NA	NA	NA	NA	NA	NA	NA	NA	NA	NA	intergenic	NONE,KLHL1
12	43430097	2.20396e-09	NA	NA	NA	NA	NA	NA	NA	NA	NA	NA	NA	NA	NA	NA	intergenic	NONE,KLHL1
12	43430341	5.69085e-07	NA	NA	NA	NA	NA	NA	NA	NA	NA	NA	NA	NA	NA	NA	intergenic	NONE,KLHL1
12	43438200	1.20377e-09	NA	NA	NA	NA	NA	NA	NA	NA	NA	NA	NA	NA	NA	NA	intergenic	NONE,KLHL1
12	43520267	7.89848e-07	NA	NA	NA	NA	NA	NA	NA	NA	NA	NA	NA	NA	NA	NA	intergenic	NONE,KLHL1
12	44258765	8.76429e-08	NA	NA	NA	NA	NA	NA	NA	NA	NA	NA	NA	NA	NA	NA	intronic	KLHL1
12	45750596	2.97934e-07	NA	NA	NA	NA	NA	NA	NA	NA	NA	NA	NA	NA	NA	NA	intergenic	TRNAC-GCA,DACH1
12	45985797	4.08692e-08	NA	NA	NA	NA	NA	NA	NA	NA	NA	NA	NA	NA	NA	NA	intergenic	TRNAC-GCA,DACH1
12	47390011	2.10321e-08	NA	NA	NA	NA	NA	NA	NA	NA	NA	NA	NA	NA	NA	NA	intergenic	TRNAC-ACA,MZT1
12	47390122	4.23134e-09	NA	NA	NA	NA	NA	NA	NA	NA	NA	NA	NA	NA	NA	NA	intergenic	TRNAC-ACA,MZT1
12	47390392	1.93965e-09	NA	NA	NA	NA	NA	NA	NA	NA	NA	NA	NA	NA	NA	NA	intergenic	TRNAC-ACA,MZT1
12	47390418	5.10277e-09	NA	NA	NA	NA	NA	NA	NA	NA	NA	NA	NA	NA	NA	NA	intergenic	TRNAC-ACA,MZT1
12	47390480	5.78214e-08	NA	NA	NA	NA	NA	NA	NA	NA	NA	NA	NA	NA	NA	NA	intergenic	TRNAC-ACA,MZT1
12	50118341	NA	NA	NA	NA	NA	NA	NA	8.30469e-08	2.65674e-07	NA	NA	NA	NA	NA	NA	intergenic	KLF12,TRNAY-AUA
12	51735192	6.037e-07	NA	NA	NA	NA	NA	NA	NA	NA	NA	NA	NA	NA	NA	NA	intergenic	LMO7,KCTD12
12	51735199	6.037e-07	NA	NA	NA	NA	NA	NA	NA	NA	NA	NA	NA	NA	NA	NA	intergenic	LMO7,KCTD12
12	51735222	3.56671e-07	NA	NA	NA	NA	NA	NA	NA	NA	NA	NA	NA	NA	NA	NA	intergenic	LMO7,KCTD12
12	51857527	5.59605e-07	NA	NA	NA	NA	NA	NA	NA	NA	NA	NA	NA	NA	NA	NA	intergenic	LMO7,KCTD12
12	53012746	8.31428e-07	NA	NA	NA	NA	NA	NA	NA	NA	NA	NA	NA	NA	NA	NA	intergenic	TRNAC-GCA,EDNRB
12	53012751	2.95619e-07	NA	NA	NA	NA	NA	NA	NA	NA	NA	NA	NA	NA	NA	NA	intergenic	TRNAC-GCA,EDNRB
12	53135880	2.31179e-07	NA	NA	NA	NA	NA	NA	NA	NA	NA	NA	NA	NA	NA	NA	intergenic	EDNRB,POU4F1
12	54061258	NA	NA	NA	NA	NA	NA	NA	NA	NA	NA	7.53681e-07	NA	NA	NA	NA	intergenic	RNF219,RBM26
12	54224317	9.11568e-08	NA	NA	NA	NA	NA	NA	NA	NA	NA	NA	NA	NA	NA	NA	intergenic	RNF219,RBM26
12	55796366	6.69353e-07	NA	NA	NA	NA	NA	NA	NA	NA	NA	NA	NA	NA	NA	NA	intergenic	TRNAG-UCC,MIR1256
12	55886023	NA	NA	NA	NA	NA	NA	NA	NA	NA	NA	NA	NA	NA	8.41586e-07	NA	intergenic	TRNAG-UCC,MIR1256
12	58509787	NA	NA	NA	NA	NA	NA	NA	NA	NA	NA	NA	NA	NA	8.37809e-07	NA	intergenic	TRNAC-GCA,SLITRK1
12	58510107	NA	NA	NA	NA	NA	NA	NA	NA	NA	NA	NA	NA	NA	3.58588e-07	NA	intergenic	TRNAC-GCA,SLITRK1
12	60532142	2.59508e-07	NA	NA	NA	NA	NA	NA	NA	NA	NA	NA	NA	NA	NA	NA	intergenic	TRNAC-GCA,TRNAC-GCA
12	70631531	NA	NA	NA	1.07027e-07	NA	NA	NA	NA	NA	NA	NA	NA	NA	NA	NA	intronic	LOC101906567
12	72954043	NA	NA	NA	6.50619e-07	NA	NA	NA	NA	NA	NA	NA	NA	NA	NA	NA	intronic	CLDN10
12	77542565	8.09531e-07	NA	NA	NA	NA	NA	NA	NA	NA	NA	NA	NA	NA	NA	NA	intergenic	MIR2892,NALCN
12	78012824	NA	9.26451e-08	NA	NA	NA	NA	NA	NA	NA	NA	NA	NA	NA	NA	NA	intronic	ITGBL1
12	78302130	NA	NA	NA	NA	NA	NA	NA	NA	NA	NA	NA	NA	NA	5.25353e-11	NA	intronic	FGF14
12	79202380	1.37376e-07	NA	NA	NA	NA	NA	NA	NA	NA	NA	NA	NA	NA	NA	NA	intergenic	METTL21E,SLC10A2
12	80776221	NA	6.25635e-07	NA	NA	NA	NA	NA	NA	NA	NA	NA	NA	NA	NA	NA	intergenic	TRNAF-GAA,EFNB2
12	80776243	NA	5.67075e-10	8.35206e-09	4.35938e-09	5.5648e-08	1.50784e-09	NA	NA	NA	2.37636e-07	2.62051e-07	NA	NA	NA	2.91364e-08	intergenic	TRNAF-GAA,EFNB2
12	80776258	NA	1.31051e-10	1.92415e-09	1.49075e-09	2.13666e-08	4.58556e-10	NA	NA	NA	7.75553e-08	1.05249e-07	NA	NA	NA	1.03649e-08	intergenic	TRNAF-GAA,EFNB2
12	81309612	NA	2.20913e-07	NA	8.66304e-07	NA	4.69778e-07	NA	NA	NA	NA	NA	NA	NA	NA	NA	intergenic	TRNAF-GAA,EFNB2
12	81721687	NA	NA	NA	6.08791e-07	NA	7.85178e-07	NA	NA	NA	6.5183e-07	6.6652e-07	NA	NA	NA	8.72323e-07	intergenic	TRNAF-GAA,EFNB2
12	81777350	NA	4.48607e-07	NA	NA	NA	NA	NA	NA	NA	NA	NA	NA	NA	NA	NA	intergenic	TRNAF-GAA,EFNB2
12	85191333	NA	NA	NA	NA	NA	NA	NA	1.99581e-07	NA	NA	NA	NA	NA	NA	NA	intronic	RAB20
12	85191336	NA	NA	NA	NA	NA	NA	NA	2.23645e-07	NA	NA	NA	NA	NA	NA	NA	intronic	RAB20
13	2345677	NA	NA	NA	6.90936e-07	NA	NA	NA	NA	NA	NA	NA	NA	NA	NA	NA	intronic	PLCB4
13	3583713	NA	NA	NA	NA	NA	NA	NA	NA	NA	NA	NA	NA	NA	8.17686e-07	NA	intergenic	SNAP25,MKKS
13	6547937	NA	NA	NA	NA	NA	NA	NA	NA	NA	NA	NA	NA	NA	7.60992e-07	NA	intergenic	LOC107133022,SPTLC3
13	7542205	NA	NA	NA	1.6215e-07	NA	NA	NA	NA	NA	NA	NA	NA	NA	NA	NA	intergenic	SEL1L2,MACROD2
13	10795863	NA	NA	NA	NA	NA	NA	NA	NA	NA	NA	NA	NA	NA	1.62537e-10	NA	intronic	NINL
13	12740431	NA	NA	NA	NA	NA	NA	NA	NA	NA	NA	6.01777e-07	9.97854e-07	NA	NA	NA	intronic	USP6NL
13	12740532	NA	NA	NA	4.30864e-07	NA	NA	NA	NA	NA	NA	NA	NA	NA	NA	NA	intronic	USP6NL
13	13199365	NA	NA	NA	NA	NA	NA	NA	NA	NA	NA	NA	NA	NA	5.25108e-07	NA	intergenic	CELF2,NONE
13	14937752	NA	6.94501e-07	NA	2.91568e-07	NA	1.86952e-07	NA	NA	NA	NA	NA	NA	NA	NA	NA	intergenic	CELF2,GATA3
13	16605523	NA	NA	NA	NA	NA	NA	NA	NA	NA	NA	NA	6.3416e-07	NA	NA	NA	intergenic	SFMBT2,PRKCQ
13	21369880	NA	NA	4.36439e-07	9.7677e-07	NA	6.67227e-07	NA	NA	NA	NA	NA	NA	NA	NA	NA	intronic	PLXDC2
13	21369895	NA	NA	3.59613e-08	2.30117e-07	NA	3.21433e-07	NA	NA	NA	NA	NA	NA	NA	NA	NA	intronic	PLXDC2
13	21370084	NA	NA	6.54465e-07	NA	NA	NA	NA	NA	NA	NA	NA	NA	NA	NA	NA	intronic	PLXDC2
13	21572671	NA	NA	NA	1.70311e-07	NA	NA	NA	NA	NA	NA	NA	NA	NA	NA	NA	intronic	PLXDC2
13	24141616	NA	NA	NA	NA	NA	NA	NA	NA	NA	NA	9.25218e-07	NA	NA	NA	NA	downstream	MSRB2
13	24144869	NA	NA	NA	NA	NA	NA	NA	NA	NA	7.01131e-07	4.33199e-08	NA	NA	NA	NA	intergenic	MSRB2,PTF1A
13	30841988	NA	NA	8.51616e-07	NA	NA	NA	NA	NA	NA	NA	NA	NA	NA	NA	NA	intergenic	MINDY3,PTER
13	31296845	NA	8.95751e-07	NA	NA	NA	NA	NA	NA	NA	NA	NA	NA	NA	NA	NA	intronic	CUBN
13	31475784	NA	1.60019e-07	NA	NA	NA	NA	NA	NA	NA	NA	NA	NA	NA	NA	NA	intronic	CUBN
13	31475876	NA	8.25353e-08	NA	NA	NA	NA	NA	NA	NA	NA	NA	NA	NA	NA	NA	intronic	CUBN
13	31511978	NA	8.23448e-07	NA	NA	NA	NA	NA	NA	NA	NA	NA	NA	NA	NA	NA	intronic	CUBN
13	34629799	NA	NA	NA	9.95933e-08	NA	NA	NA	NA	NA	NA	NA	NA	NA	NA	NA	intronic	SVIL
13	36316872	NA	NA	NA	4.99899e-07	NA	NA	NA	NA	NA	NA	NA	NA	NA	NA	NA	intronic	MPP7
13	36681488	NA	NA	NA	NA	NA	NA	NA	NA	NA	8.71128e-07	9.68621e-08	NA	NA	NA	NA	intronic	ARMC4
13	37306306	NA	NA	NA	8.19729e-07	NA	NA	NA	NA	NA	NA	NA	NA	NA	NA	NA	intergenic	PTCHD3,PCSK2
13	38518086	NA	NA	NA	NA	NA	NA	7.27234e-07	NA	NA	NA	NA	NA	NA	NA	NA	intronic	DZANK1
13	39222461	NA	NA	NA	8.08615e-07	5.86666e-07	NA	NA	NA	NA	NA	NA	NA	NA	NA	NA	intronic	SLC24A3
13	39253751	NA	NA	NA	8.85614e-07	NA	NA	NA	NA	NA	NA	NA	NA	NA	NA	NA	intronic	SLC24A3
13	45530617	NA	NA	NA	NA	5.01389e-07	NA	NA	NA	NA	NA	NA	NA	NA	NA	NA	intergenic	PFKP,ADARB2
13	47107678	NA	NA	NA	NA	8.42951e-07	NA	NA	NA	NA	7.01693e-07	3.95418e-07	NA	NA	NA	NA	intergenic	PRND,RASSF2
13	51154104	3.82411e-07	NA	NA	NA	NA	NA	NA	NA	NA	NA	NA	NA	NA	NA	NA	intergenic	LOC104973937,RNF24
13	57913589	2.02947e-07	NA	NA	NA	NA	NA	NA	NA	NA	NA	NA	NA	NA	NA	NA	intergenic	APCDD1L,VAPB
13	60175903	NA	NA	NA	NA	NA	NA	NA	7.96493e-07	NA	NA	NA	NA	NA	NA	NA	intergenic	RSPO4,ANGPT4
13	64440498	NA	NA	NA	NA	NA	NA	NA	NA	3.65183e-07	NA	NA	NA	NA	NA	NA	intergenic	EDEM2,PROCR
13	64773441	NA	7.98586e-08	8.56018e-07	NA	NA	NA	NA	NA	NA	NA	NA	NA	NA	NA	NA	intergenic	C13H20orf173,ERGIC3
13	64795187	NA	3.8327e-07	NA	NA	NA	NA	NA	NA	NA	NA	NA	NA	NA	NA	NA	intronic	LOC526745
13	64795242	NA	6.78722e-07	NA	NA	NA	NA	NA	NA	NA	NA	NA	NA	NA	NA	NA	intronic	LOC526745
13	64830253	NA	2.96185e-07	4.72731e-07	NA	NA	NA	NA	NA	NA	NA	NA	NA	NA	NA	NA	exonic	LOC526745
13	65484574	7.62763e-07	NA	NA	NA	NA	NA	NA	NA	NA	NA	NA	NA	NA	NA	NA	intergenic	AAR2,DLGAP4
13	67272034	NA	NA	NA	NA	NA	NA	NA	NA	9.70491e-07	NA	NA	NA	NA	NA	NA	intergenic	LBP,LOC514978
13	67342810	NA	NA	NA	NA	NA	NA	NA	2.94589e-07	NA	NA	NA	NA	NA	NA	NA	intronic	LOC100847118
13	68043501	NA	NA	NA	4.28568e-07	NA	NA	NA	NA	NA	NA	NA	NA	NA	NA	NA	intergenic	DHX35,TRNAR-UCU
13	68099505	NA	NA	NA	NA	NA	NA	NA	NA	NA	NA	NA	NA	NA	1.58992e-09	NA	intergenic	DHX35,TRNAR-UCU
13	78415272	NA	NA	1.50334e-07	NA	NA	NA	NA	NA	NA	NA	NA	NA	NA	NA	NA	intergenic	CEBPB,PTPN1
13	78424430	NA	5.84016e-07	3.46775e-08	NA	NA	NA	NA	NA	NA	NA	NA	NA	NA	NA	NA	intergenic	CEBPB,PTPN1
13	78424703	NA	2.36736e-07	9.58348e-08	NA	NA	NA	NA	NA	NA	NA	NA	NA	NA	NA	NA	intergenic	CEBPB,PTPN1
13	78424707	NA	5.54119e-07	1.86275e-07	NA	NA	NA	NA	NA	NA	NA	NA	NA	NA	NA	NA	intergenic	CEBPB,PTPN1
13	78426788	NA	NA	3.83309e-09	1.20085e-07	NA	2.7468e-07	NA	NA	NA	NA	NA	NA	NA	NA	NA	intergenic	CEBPB,PTPN1
13	78433838	NA	NA	6.37986e-07	NA	NA	NA	NA	NA	NA	NA	NA	NA	NA	NA	NA	intergenic	CEBPB,PTPN1
13	78469792	NA	NA	5.72947e-07	NA	NA	NA	NA	NA	NA	NA	NA	NA	NA	NA	NA	intergenic	CEBPB,PTPN1
13	78760931	NA	7.80006e-07	6.4828e-07	NA	NA	3.79091e-07	NA	NA	NA	NA	NA	NA	NA	NA	NA	intronic	BCAS4
13	78965788	NA	NA	NA	7.05733e-07	NA	NA	NA	NA	NA	NA	NA	NA	NA	NA	NA	intergenic	KCNG1,TRNAR-UCU
13	79000277	NA	2.031e-08	1.11858e-08	NA	NA	5.56518e-07	NA	NA	NA	NA	NA	NA	NA	NA	NA	intergenic	KCNG1,TRNAR-UCU
13	79150897	NA	NA	NA	NA	NA	NA	NA	NA	NA	NA	NA	NA	NA	1.08675e-08	NA	intergenic	TRNAR-UCU,NFATC2
13	79462940	NA	NA	NA	NA	NA	NA	NA	NA	NA	NA	NA	NA	NA	7.38523e-07	NA	intronic	ATP9A
13	79511272	NA	NA	9.89375e-07	NA	NA	NA	NA	NA	NA	NA	NA	NA	NA	NA	NA	intronic	ATP9A
13	79515909	NA	NA	5.00932e-07	3.94754e-07	NA	NA	NA	NA	NA	NA	NA	NA	NA	NA	NA	intronic	ATP9A
13	80180600	NA	NA	8.07894e-07	NA	NA	NA	NA	NA	NA	NA	NA	NA	NA	NA	NA	intergenic	ZFP64,TSHZ2
13	80204635	NA	NA	3.12273e-07	NA	NA	NA	NA	NA	NA	NA	NA	NA	NA	NA	NA	intergenic	ZFP64,TSHZ2
13	80294543	NA	NA	NA	NA	NA	NA	NA	NA	NA	NA	NA	NA	NA	4.52183e-09	NA	intergenic	ZFP64,TSHZ2
13	80977162	NA	NA	NA	1.96237e-07	NA	NA	NA	NA	NA	NA	NA	NA	NA	NA	NA	intronic	TSHZ2
13	81353546	NA	NA	3.13085e-07	NA	NA	NA	NA	NA	NA	NA	NA	NA	NA	NA	NA	intergenic	ZNF217,BCAS1
13	83001953	NA	NA	NA	2.6242e-08	NA	1.7605e-07	NA	NA	NA	NA	NA	NA	NA	NA	NA	intergenic	TRNAG-GCC,CBLN4
13	83318562	NA	NA	NA	NA	NA	NA	NA	NA	NA	NA	NA	NA	NA	5.81703e-07	NA	intergenic	CBLN4,LOC100298309
14	8290664	1.01313e-07	NA	NA	NA	NA	NA	NA	NA	NA	NA	NA	NA	NA	NA	NA	intronic	SLA,TG
14	8449450	8.34846e-07	NA	NA	NA	NA	NA	NA	NA	NA	NA	NA	NA	NA	NA	NA	exonic	TG
14	10245530	6.84497e-08	NA	NA	NA	NA	NA	NA	NA	NA	NA	NA	NA	NA	NA	NA	intergenic	ADCY8,ASAP1
14	10252590	7.16231e-07	NA	NA	NA	NA	NA	NA	NA	NA	NA	NA	NA	NA	NA	NA	intergenic	ADCY8,ASAP1
14	10402143	NA	NA	NA	NA	NA	NA	NA	NA	NA	NA	NA	4.59582e-07	NA	NA	NA	intronic	ASAP1
14	13311752	NA	NA	NA	NA	NA	NA	NA	NA	NA	NA	NA	NA	NA	4.18115e-07	NA	intergenic	MYC,MIR2310
14	13801340	NA	NA	NA	NA	NA	NA	NA	NA	NA	NA	NA	NA	NA	9.5358e-07	NA	intergenic	LOC112449613,FAM84B
14	14036037	NA	NA	NA	NA	NA	NA	NA	NA	NA	NA	NA	NA	NA	2.08286e-07	NA	intergenic	FAM84B,TRIB1
14	14048741	NA	NA	NA	NA	NA	NA	NA	NA	NA	NA	NA	NA	NA	9.43485e-07	NA	intergenic	FAM84B,TRIB1
14	14050498	NA	NA	NA	NA	NA	NA	NA	NA	NA	NA	NA	NA	NA	5.23244e-07	NA	intergenic	FAM84B,TRIB1
14	15368650	NA	NA	NA	NA	NA	NA	NA	NA	NA	NA	NA	NA	NA	9.68976e-07	NA	intergenic	ZNF572,MTSS1
14	15507974	NA	NA	NA	NA	NA	NA	NA	NA	NA	NA	NA	NA	4.65895e-07	NA	NA	intronic	MTSS1
14	17315756	NA	1.48609e-07	NA	NA	NA	NA	NA	2.84753e-07	NA	NA	NA	NA	NA	NA	NA	intergenic	ZHX2,LOC522769
14	17666204	NA	NA	NA	NA	NA	NA	NA	NA	NA	NA	NA	NA	NA	8.86276e-07	NA	intergenic	ZHX2,LOC522769
14	17934672	NA	NA	NA	NA	NA	NA	NA	NA	NA	NA	NA	NA	NA	7.04426e-07	NA	intergenic	LOC522769,HAS2
14	19416497	4.10707e-07	NA	NA	NA	NA	NA	NA	NA	NA	NA	NA	NA	NA	NA	NA	intergenic	SPIDR,H3F3C
14	19416542	1.35564e-07	NA	NA	NA	NA	NA	NA	NA	NA	NA	NA	NA	NA	NA	NA	intergenic	SPIDR,H3F3C
14	19416593	4.37041e-07	NA	NA	NA	NA	NA	NA	NA	NA	NA	NA	NA	NA	NA	NA	intergenic	SPIDR,H3F3C
14	19423159	8.23002e-07	NA	NA	NA	NA	NA	NA	NA	NA	NA	NA	NA	NA	NA	NA	intergenic	H3F3C,PRKDC
14	19424059	3.23617e-07	NA	NA	NA	NA	NA	NA	NA	NA	NA	NA	NA	NA	NA	NA	downstream	PRKDC
14	19424816	2.98762e-07	NA	NA	NA	NA	NA	NA	NA	NA	NA	NA	NA	NA	NA	NA	UTR3	PRKDC
14	19425058	2.149e-07	NA	NA	NA	NA	NA	NA	NA	NA	NA	NA	NA	NA	NA	NA	UTR3	PRKDC
14	19529394	NA	3.5561e-07	3.67096e-08	6.82214e-07	NA	5.5317e-07	NA	NA	NA	NA	NA	NA	NA	NA	NA	intronic	PRKDC
14	19611427	NA	NA	2.26077e-07	NA	NA	NA	NA	NA	NA	NA	NA	NA	NA	NA	NA	intronic	UBE2V2
14	19673315	NA	3.83797e-09	8.68064e-09	4.09898e-07	NA	1.17866e-07	NA	NA	NA	NA	NA	NA	NA	NA	NA	intergenic	UBE2V2,EFCAB1
14	19756839	NA	NA	4.29161e-07	8.5723e-07	NA	NA	NA	NA	NA	NA	NA	NA	NA	NA	NA	intergenic	UBE2V2,EFCAB1
14	19818884	NA	NA	7.51454e-07	NA	NA	NA	NA	NA	NA	NA	NA	NA	NA	NA	NA	intronic	EFCAB1
14	19835609	NA	NA	NA	NA	NA	NA	NA	NA	NA	NA	NA	9.40781e-07	NA	NA	NA	intergenic	EFCAB1,SNAI2
14	19846075	NA	8.47191e-07	2.97843e-07	NA	NA	NA	NA	NA	NA	NA	NA	NA	NA	NA	NA	intergenic	EFCAB1,SNAI2
14	19859164	NA	NA	5.64022e-07	NA	NA	NA	NA	9.82144e-07	NA	NA	NA	NA	NA	NA	3.11315e-07	intergenic	EFCAB1,SNAI2
14	20005227	NA	NA	6.56597e-07	NA	NA	NA	NA	NA	NA	NA	NA	NA	NA	NA	NA	intergenic	PPDPFL,SNTG1
14	20219701	NA	NA	5.97573e-07	NA	NA	NA	NA	NA	NA	NA	NA	NA	NA	NA	NA	intergenic	PPDPFL,SNTG1
14	20309927	NA	NA	7.47155e-07	NA	NA	NA	NA	NA	NA	NA	NA	NA	NA	NA	NA	intronic	SNTG1
14	20359093	NA	NA	4.5062e-07	NA	NA	NA	NA	NA	NA	NA	NA	NA	NA	NA	NA	intronic	SNTG1
14	20462897	NA	NA	9.00342e-07	NA	NA	NA	NA	NA	NA	NA	NA	NA	NA	NA	NA	intronic	SNTG1
14	20772428	NA	NA	3.99338e-08	8.24233e-08	NA	1.86375e-07	NA	NA	NA	NA	NA	NA	NA	NA	NA	intergenic	SNTG1,PCMTD1
14	20818886	NA	NA	NA	NA	NA	NA	NA	NA	NA	NA	NA	NA	NA	8.91683e-07	NA	intergenic	SNTG1,PCMTD1
14	41197585	NA	NA	2.62679e-07	NA	NA	NA	NA	NA	NA	NA	NA	NA	NA	NA	NA	intergenic	LOC782385,PKIA
14	41199404	NA	NA	2.86848e-07	NA	NA	NA	NA	NA	NA	NA	NA	NA	NA	NA	NA	intergenic	LOC782385,PKIA
14	41208212	NA	NA	7.91371e-07	NA	NA	NA	NA	NA	NA	NA	NA	NA	NA	NA	NA	intergenic	LOC782385,PKIA
14	42427334	4.25719e-07	NA	NA	NA	NA	NA	NA	NA	NA	NA	NA	NA	NA	NA	NA	intergenic	IL7,STMN2
14	42628228	NA	NA	2.6667e-07	NA	NA	NA	NA	NA	NA	NA	NA	NA	NA	NA	NA	intergenic	IL7,STMN2
14	43384679	3.11686e-07	NA	NA	NA	NA	NA	NA	NA	NA	NA	NA	NA	NA	NA	NA	intergenic	TPD52,ZBTB10
14	46645459	NA	NA	4.48167e-07	NA	NA	NA	NA	NA	NA	NA	NA	NA	NA	NA	NA	intergenic	EXT1,MED30
14	46645560	NA	3.0925e-08	1.1504e-10	NA	NA	3.58356e-07	NA	NA	NA	NA	NA	NA	NA	NA	NA	intergenic	EXT1,MED30
14	52811519	NA	NA	NA	4.39895e-07	NA	NA	NA	NA	NA	NA	NA	NA	NA	NA	NA	intergenic	LOC112449524,TRNAE-UUC
14	55213585	NA	NA	NA	NA	NA	NA	NA	NA	NA	NA	NA	NA	NA	5.41644e-07	NA	intergenic	NUDCD1,TRHR
14	57548749	NA	NA	NA	NA	NA	NA	NA	NA	NA	NA	7.46219e-07	NA	NA	NA	NA	intergenic	ANGPT1,ABRA
14	62280914	NA	NA	1.81729e-07	1.00275e-07	NA	5.4898e-07	NA	NA	NA	NA	NA	NA	NA	NA	NA	intronic	NCALD
14	62284951	NA	NA	NA	8.08426e-07	NA	NA	NA	NA	NA	NA	NA	NA	NA	NA	NA	intronic	NCALD
14	63506416	NA	NA	NA	NA	NA	NA	NA	NA	6.90105e-07	NA	NA	NA	NA	NA	NA	intergenic	YWHAZ,TRNAY-AUA
14	63681456	NA	5.6012e-07	NA	NA	NA	NA	NA	NA	NA	NA	NA	NA	NA	NA	NA	intergenic	PABPC1,SNX31
14	64282819	NA	NA	NA	6.02052e-07	NA	NA	NA	NA	NA	NA	NA	NA	NA	NA	NA	intronic	RGS22
14	65726230	NA	NA	NA	NA	NA	NA	NA	NA	NA	6.40292e-07	8.58917e-07	NA	NA	NA	NA	intronic	STK3
14	66044894	NA	NA	NA	NA	NA	NA	NA	NA	NA	NA	NA	NA	NA	NA	6.5238e-07	intronic	NIPAL2
14	66049056	NA	8.5278e-07	6.66708e-07	1.60054e-08	6.12311e-07	5.51051e-08	NA	NA	NA	NA	NA	NA	NA	NA	2.87353e-07	exonic	NIPAL2
14	66050555	NA	9.54794e-07	6.64253e-08	5.49887e-09	1.33859e-07	1.72953e-08	NA	NA	NA	NA	5.97701e-07	NA	NA	NA	1.46309e-07	intronic	NIPAL2
14	66052817	NA	7.10895e-07	3.17897e-08	5.84082e-09	1.87715e-07	1.69945e-08	NA	NA	NA	NA	9.89832e-07	NA	NA	NA	7.07625e-08	UTR3	NIPAL2
14	66053496	NA	NA	NA	7.09765e-07	NA	NA	NA	NA	NA	NA	NA	NA	NA	NA	NA	UTR3	NIPAL2
14	68595934	NA	NA	NA	2.61094e-07	NA	NA	NA	NA	NA	NA	NA	NA	NA	NA	NA	intergenic	GDF6,TRNAS-AGA
14	68647833	NA	NA	NA	NA	NA	NA	NA	NA	7.9447e-07	NA	NA	NA	NA	NA	NA	intergenic	GDF6,TRNAS-AGA
14	70714038	NA	NA	NA	NA	NA	NA	NA	NA	NA	6.07202e-07	2.67017e-07	NA	NA	NA	NA	intergenic	FAM92A,TRIQK
14	70916823	NA	NA	NA	NA	NA	NA	NA	9.25769e-07	NA	3.55075e-07	NA	NA	NA	NA	4.69115e-07	intergenic	FAM92A,TRIQK
14	71461304	NA	NA	NA	NA	NA	NA	NA	NA	NA	NA	9.7038e-07	NA	NA	NA	NA	intronic	TRIQK
14	71461709	NA	NA	9.99378e-08	NA	3.73464e-07	2.26947e-07	NA	NA	NA	2.7236e-07	1.27451e-07	NA	NA	NA	8.6234e-08	intronic	TRIQK
14	77650591	NA	NA	NA	NA	NA	NA	NA	NA	NA	NA	NA	NA	NA	7.52982e-07	NA	intergenic	LOC506670,RALYL
14	77653228	NA	NA	NA	NA	NA	NA	NA	NA	NA	NA	NA	NA	NA	5.70686e-07	NA	intergenic	LOC506670,RALYL
14	77653265	NA	NA	NA	NA	NA	NA	NA	NA	NA	NA	NA	NA	NA	1.91229e-07	NA	intergenic	LOC506670,RALYL
14	77663112	NA	NA	NA	NA	NA	NA	NA	NA	NA	NA	NA	NA	NA	6.08889e-07	NA	intergenic	LOC506670,RALYL
14	77663668	NA	NA	NA	NA	NA	NA	NA	NA	NA	NA	NA	NA	NA	2.09272e-07	NA	intergenic	LOC506670,RALYL
14	77671147	NA	NA	NA	NA	NA	NA	NA	NA	NA	NA	NA	NA	NA	8.77726e-08	NA	intronic	RALYL
14	79230188	NA	NA	NA	NA	NA	NA	NA	NA	1.40374e-08	NA	NA	NA	NA	NA	NA	intergenic	TRNAS-GGA,LOC784458
14	79685422	NA	NA	NA	NA	NA	NA	NA	NA	9.0433e-07	NA	NA	NA	NA	NA	NA	intergenic	TRNAS-GGA,LOC784458
14	79878078	NA	NA	NA	NA	NA	NA	NA	NA	1.4281e-08	NA	NA	NA	NA	NA	NA	intergenic	TRNAS-GGA,LOC784458
14	79925735	NA	NA	7.99354e-07	NA	NA	NA	NA	NA	NA	NA	NA	NA	NA	NA	NA	intergenic	TRNAS-GGA,LOC784458
14	80012680	NA	NA	NA	NA	4.57503e-07	NA	NA	NA	NA	3.33052e-08	9.76928e-08	NA	NA	NA	NA	intergenic	TRNAS-GGA,LOC784458
15	287122	NA	NA	NA	NA	NA	NA	NA	NA	NA	NA	NA	NA	NA	6.51588e-07	NA	intergenic	LOC100299084,LOC781264
15	531131	NA	NA	NA	NA	NA	NA	NA	NA	NA	NA	NA	NA	NA	2.86712e-07	NA	intergenic	LOC518869,LOC618523
15	856604	NA	NA	NA	NA	NA	NA	NA	NA	NA	NA	NA	NA	NA	7.21403e-07	NA	intergenic	LOC532486,LOC515790
15	856682	NA	NA	NA	NA	NA	NA	NA	NA	NA	NA	NA	NA	NA	6.70121e-07	NA	intergenic	LOC532486,LOC515790
15	856877	NA	NA	NA	NA	NA	NA	NA	NA	NA	NA	NA	NA	NA	5.96899e-07	NA	intergenic	LOC532486,LOC515790
15	857707	NA	NA	NA	NA	NA	NA	NA	NA	NA	NA	NA	NA	NA	1.15036e-07	NA	intergenic	LOC532486,LOC515790
15	857817	NA	NA	NA	NA	NA	NA	NA	NA	NA	NA	NA	NA	NA	1.38662e-07	NA	intergenic	LOC532486,LOC515790
15	6045825	NA	NA	2.85782e-07	NA	NA	NA	NA	NA	NA	NA	NA	NA	NA	NA	NA	intronic	MMP20
15	7576672	NA	NA	NA	NA	7.4895e-07	NA	NA	NA	NA	NA	NA	NA	NA	NA	NA	intergenic	TRPC6,PGR
15	8772182	NA	NA	NA	8.73443e-07	NA	9.21091e-07	NA	NA	NA	NA	NA	NA	NA	NA	NA	intergenic	ARHGAP42,CNTN5
15	11734307	NA	1.14868e-07	9.94703e-07	NA	NA	NA	NA	NA	NA	NA	NA	NA	NA	NA	NA	intergenic	TRNAW-CCA,TRNAW-CCA
15	17438061	NA	NA	NA	NA	7.60106e-07	NA	NA	NA	NA	NA	NA	NA	NA	NA	NA	intronic	SLC35F2
15	18706596	NA	NA	NA	NA	NA	NA	NA	NA	NA	NA	NA	NA	NA	2.7501e-07	NA	intergenic	DDX10,C15H11orf87
15	23608783	NA	NA	NA	NA	NA	NA	NA	NA	NA	NA	5.04187e-07	NA	NA	NA	NA	intronic	NCAM1
15	24053183	NA	NA	NA	NA	NA	NA	NA	NA	NA	NA	NA	NA	NA	6.22008e-08	NA	intergenic	DRD2,NONE
15	24937314	NA	NA	NA	NA	NA	NA	NA	NA	NA	8.89966e-07	3.53232e-07	NA	NA	NA	NA	intergenic	RBM7,REXO2
15	26391884	NA	1.18966e-07	NA	NA	NA	5.66104e-07	NA	NA	NA	NA	NA	NA	NA	NA	NA	intergenic	CADM1,BUD13
15	26438884	NA	NA	NA	NA	4.39168e-07	NA	NA	NA	NA	NA	NA	NA	NA	NA	NA	intergenic	CADM1,BUD13
15	26841976	NA	2.80271e-07	6.98812e-07	5.6175e-07	3.70967e-07	2.79291e-07	NA	NA	NA	NA	NA	NA	NA	NA	7.96226e-07	intergenic	CADM1,BUD13
15	33955335	NA	NA	NA	NA	NA	NA	NA	NA	NA	NA	NA	NA	NA	7.51454e-07	NA	intergenic	CLMP,GRAMD1B
15	34278735	NA	NA	NA	NA	NA	NA	NA	NA	NA	NA	NA	NA	NA	4.44783e-07	NA	intergenic	SCN3B,ZNF202
15	38140448	NA	NA	NA	NA	NA	NA	NA	NA	NA	NA	NA	NA	NA	1.33879e-08	NA	intergenic	PDE3B,PSMA1
15	38565580	NA	NA	NA	NA	NA	NA	NA	NA	NA	NA	NA	NA	NA	1.60612e-07	NA	intronic	SPON1
15	49936019	NA	NA	NA	NA	NA	NA	NA	NA	NA	NA	NA	NA	NA	1.76262e-07	NA	intergenic	LOC112441578,OR52J3
15	65960074	NA	NA	9.28145e-07	NA	NA	NA	NA	NA	NA	NA	NA	NA	NA	NA	NA	intronic	PAMR1
15	68217032	NA	NA	NA	NA	NA	NA	NA	NA	NA	NA	NA	9.11791e-07	NA	NA	NA	intergenic	C15H11orf74,NONE
15	73067325	NA	NA	NA	NA	NA	NA	NA	NA	NA	NA	NA	NA	6.74937e-07	NA	NA	intergenic	NONE,API5
15	73204929	NA	NA	NA	NA	NA	NA	NA	NA	NA	NA	NA	NA	NA	3.68575e-07	NA	intergenic	NONE,API5
15	74541540	NA	NA	NA	NA	8.93566e-07	NA	NA	NA	NA	NA	NA	NA	NA	NA	NA	intergenic	ALX4,CD82
15	74541957	NA	9.72614e-08	5.82835e-07	NA	NA	NA	NA	NA	NA	NA	NA	NA	NA	NA	NA	intergenic	ALX4,CD82
15	74945250	NA	NA	NA	NA	NA	NA	NA	3.38711e-07	NA	NA	NA	NA	NA	NA	1.35937e-07	intronic	TSPAN18
15	74945251	NA	NA	NA	NA	NA	NA	NA	3.38711e-07	NA	NA	NA	NA	NA	NA	1.35937e-07	intronic	TSPAN18
15	74956437	NA	NA	7.47506e-07	NA	NA	NA	NA	NA	NA	NA	NA	NA	NA	NA	NA	intronic	TSPAN18
15	75135335	NA	NA	NA	NA	6.04879e-07	9.27551e-07	NA	NA	NA	NA	NA	NA	NA	NA	NA	intergenic	TP53I11,PRDM11
15	75184108	NA	NA	1.49731e-07	NA	7.58951e-08	1.8167e-07	NA	NA	NA	NA	NA	NA	NA	NA	NA	intergenic	TP53I11,PRDM11
15	75186325	NA	NA	9.51896e-07	NA	5.27206e-08	2.30517e-07	NA	NA	NA	6.5758e-07	NA	NA	NA	NA	9.61234e-07	intergenic	TP53I11,PRDM11
15	75190771	NA	NA	NA	NA	9.05143e-07	NA	NA	NA	NA	NA	NA	NA	NA	NA	NA	intergenic	TP53I11,PRDM11
15	75445824	NA	NA	9.54739e-07	NA	NA	NA	NA	NA	NA	NA	NA	NA	NA	NA	NA	intergenic	SYT13,LOC112441655
15	75670650	NA	NA	NA	NA	4.40827e-07	NA	NA	NA	NA	NA	NA	NA	NA	NA	NA	intergenic	LOC112441655,CHST1
15	75761696	NA	NA	NA	NA	6.48005e-07	NA	NA	NA	NA	NA	NA	NA	NA	NA	NA	intergenic	CHST1,SLC35C1
15	76257974	NA	NA	NA	NA	9.00721e-07	NA	NA	NA	NA	NA	NA	NA	NA	NA	NA	intergenic	PHF21A,CREB3L1
15	76274681	NA	NA	NA	1.7451e-07	6.97143e-09	1.9386e-07	NA	NA	NA	NA	9.71575e-07	NA	NA	NA	3.63077e-07	intergenic	PHF21A,CREB3L1
15	76292092	NA	6.75446e-07	5.67351e-07	NA	3.98524e-07	3.62259e-07	NA	NA	NA	NA	NA	NA	NA	NA	NA	intronic	CREB3L1
15	76748707	NA	NA	4.78948e-08	NA	NA	NA	NA	NA	NA	NA	NA	NA	NA	NA	NA	intronic	CKAP5
15	77255183	NA	8.03954e-07	NA	NA	2.36461e-07	5.66524e-07	NA	NA	NA	6.06928e-07	NA	NA	NA	NA	1.3897e-07	exonic	PSMC3
15	77961617	6.26338e-08	NA	NA	NA	NA	NA	NA	NA	NA	NA	NA	NA	NA	NA	NA	intergenic	OR4X1,LOC107131315
15	78211022	NA	NA	1.43865e-07	NA	NA	NA	NA	NA	NA	NA	NA	NA	NA	NA	NA	upstream	LOC100336921
15	78267499	NA	5.99437e-07	7.05381e-08	NA	4.16405e-07	1.68439e-07	NA	NA	NA	NA	NA	NA	NA	NA	NA	intergenic	LOC789193,LOC789201
15	78320844	NA	NA	NA	NA	9.82379e-07	NA	NA	NA	NA	NA	NA	NA	NA	NA	NA	intergenic	LOC531097,LOC100294956
15	78320862	NA	NA	NA	NA	1.77776e-07	NA	NA	NA	NA	6.92516e-07	6.97042e-07	NA	NA	NA	6.43271e-07	intergenic	LOC531097,LOC100294956
15	80144852	1.74536e-07	NA	NA	NA	NA	NA	NA	NA	NA	NA	NA	NA	NA	NA	NA	intergenic	LOC521081,LOC782792
15	80168013	1.71158e-09	NA	NA	NA	NA	NA	NA	NA	NA	NA	NA	NA	NA	NA	NA	intergenic	LOC782792,LOC100139408
15	80172372	3.04183e-09	NA	NA	NA	NA	NA	NA	NA	NA	NA	NA	NA	NA	NA	NA	intergenic	LOC782792,LOC100139408
15	80194285	6.7695e-07	NA	NA	NA	NA	NA	NA	NA	NA	NA	NA	NA	NA	NA	NA	exonic	LOC782830
15	80333657	NA	NA	NA	NA	3.05171e-07	4.85705e-07	NA	NA	NA	NA	NA	NA	NA	NA	NA	intergenic	TRNAG-UCC,TRNAG-UCC
15	80366114	NA	NA	NA	8.49656e-07	2.81018e-07	4.32716e-07	NA	NA	NA	NA	NA	NA	NA	NA	NA	intergenic	TRNAG-UCC,TRNAG-UCC
15	80403521	3.48034e-07	NA	NA	NA	NA	NA	NA	NA	NA	NA	NA	NA	NA	NA	NA	intergenic	LRRC55,APLNR
15	80435279	NA	NA	NA	NA	NA	8.31877e-07	NA	NA	NA	NA	NA	NA	NA	NA	NA	intergenic	LRRC55,APLNR
15	80436477	NA	2.2249e-08	NA	8.95668e-08	8.04283e-08	2.02089e-08	NA	NA	NA	7.79167e-07	2.1134e-07	NA	NA	NA	8.32817e-07	intergenic	LRRC55,APLNR
15	80723630	NA	3.18921e-07	4.1769e-07	NA	NA	9.05062e-07	NA	NA	NA	NA	NA	NA	NA	NA	NA	intronic	RTN4RL2
15	81101759	NA	NA	NA	1.15005e-07	8.07917e-08	8.32153e-08	NA	NA	NA	6.3383e-07	4.39948e-07	NA	NA	NA	7.40854e-07	intergenic	CTNND1,LOC101905743
15	81152914	NA	1.81286e-08	4.02682e-08	1.71123e-07	7.75187e-09	6.54815e-09	NA	NA	NA	1.70701e-07	NA	NA	NA	NA	5.05551e-07	intergenic	CTNND1,LOC101905743
15	81271170	NA	5.806e-08	4.10693e-10	1.80483e-07	2.07188e-07	2.52826e-08	NA	NA	NA	NA	NA	NA	NA	NA	NA	intergenic	LOC101905743,LOC524304
15	81343828	NA	NA	NA	NA	NA	NA	NA	NA	NA	NA	NA	NA	NA	4.35085e-07	NA	intergenic	LOC615808,OR9Q2
15	81356598	NA	NA	NA	NA	NA	NA	NA	NA	NA	NA	NA	NA	NA	1.5556e-07	NA	intergenic	LOC615808,OR9Q2
15	81356668	NA	NA	NA	NA	NA	NA	NA	NA	NA	NA	NA	NA	NA	2.75919e-07	NA	intergenic	LOC615808,OR9Q2
15	81414749	NA	NA	NA	NA	NA	NA	NA	NA	NA	NA	NA	NA	NA	5.26116e-07	NA	intronic	LOC104974344
15	81511699	NA	9.69464e-10	1.06358e-08	1.88076e-08	4.89888e-08	1.61048e-09	NA	NA	NA	NA	4.34778e-07	NA	NA	NA	4.50868e-07	intergenic	TRNAE-UUC,OR5B2
15	81630721	NA	7.0938e-07	NA	NA	NA	NA	NA	NA	NA	NA	NA	NA	NA	NA	NA	exonic	LOC513948
15	82745699	NA	NA	NA	NA	NA	NA	NA	NA	3.04667e-07	NA	NA	NA	NA	NA	NA	UTR5	OR4D9
15	83099914	NA	NA	NA	NA	NA	NA	NA	NA	8.32204e-08	NA	NA	NA	NA	NA	NA	intronic	OOSP2
15	83214460	NA	NA	NA	NA	NA	NA	NA	NA	NA	NA	9.16785e-07	NA	NA	NA	2.90062e-07	intronic	MS4A14
15	83216010	NA	NA	NA	NA	NA	NA	NA	NA	NA	NA	8.25239e-07	NA	NA	NA	4.89778e-07	intronic	MS4A14
15	83223083	NA	6.21041e-07	NA	1.52523e-07	1.34142e-07	7.82641e-08	NA	NA	NA	4.8664e-07	2.90119e-07	NA	NA	NA	1.98811e-07	intronic	MS4A14
15	83227249	NA	4.95758e-07	NA	5.84386e-07	NA	3.40364e-07	NA	NA	NA	NA	NA	NA	NA	NA	NA	intronic	MS4A14
15	83228720	NA	1.58783e-08	1.91295e-07	3.66705e-08	5.94866e-09	4.91218e-09	NA	NA	NA	6.57108e-08	1.65417e-07	NA	NA	NA	3.79385e-08	intronic	MS4A14
15	83238828	NA	NA	NA	NA	NA	5.66805e-07	NA	NA	NA	NA	NA	NA	NA	NA	NA	intronic	MS4A14
15	83240076	NA	NA	NA	8.07466e-07	2.72164e-07	2.22218e-07	NA	NA	NA	NA	NA	NA	NA	NA	6.66862e-07	exonic	MS4A14
15	83240215	NA	5.10133e-07	7.34532e-08	4.14406e-09	1.94914e-08	8.65627e-09	NA	NA	NA	NA	NA	NA	NA	NA	4.7443e-07	exonic	MS4A14
15	83240527	NA	1.61036e-07	4.22007e-07	3.73186e-10	3.64251e-11	3.95618e-10	NA	NA	NA	4.43513e-09	1.22972e-09	5.42393e-07	NA	NA	4.07328e-09	exonic	MS4A14
15	83242002	NA	5.4624e-07	3.94385e-07	2.48282e-08	7.55034e-10	7.09571e-09	NA	NA	NA	2.12145e-07	2.59153e-07	NA	NA	NA	4.00028e-08	downstream	MS4A14
15	83376006	NA	NA	NA	NA	4.2788e-07	NA	NA	NA	NA	NA	9.6466e-07	NA	NA	NA	NA	intergenic	MIR6519,LOC101908134
15	83376171	NA	NA	NA	NA	NA	NA	NA	NA	NA	NA	2.12905e-07	NA	NA	NA	NA	intergenic	MIR6519,LOC101908134
15	83376283	NA	NA	NA	1.01432e-07	8.84288e-09	1.30862e-07	NA	NA	NA	4.06389e-07	1.34614e-07	NA	NA	NA	2.16881e-07	intergenic	MIR6519,LOC101908134
15	83637012	NA	NA	3.54011e-07	NA	NA	NA	NA	NA	NA	NA	NA	NA	NA	NA	NA	intronic	LOC519145
15	83639788	NA	3.92755e-07	NA	NA	4.94432e-07	2.39806e-07	NA	NA	NA	NA	NA	NA	NA	NA	NA	intronic	LOC519145
15	84443704	NA	NA	NA	NA	NA	NA	NA	NA	NA	3.13906e-07	2.09837e-07	NA	NA	NA	3.91988e-07	intergenic	OR4A16,LOC100299117
15	84443705	NA	NA	NA	NA	NA	NA	NA	NA	NA	3.13906e-07	2.09837e-07	NA	NA	NA	3.91988e-07	intergenic	OR4A16,LOC100299117
16	2353382	NA	NA	NA	NA	NA	NA	NA	NA	NA	NA	NA	NA	NA	6.2141e-08	NA	intergenic	MDM4,LRRN2
16	2706518	NA	NA	NA	NA	NA	NA	NA	NA	NA	NA	NA	NA	NA	4.13295e-07	NA	intronic	NFASC
16	14777114	NA	NA	NA	NA	6.21017e-07	NA	NA	NA	NA	NA	NA	NA	NA	NA	NA	intergenic	RGS18,BRINP3
16	17726371	NA	NA	NA	NA	NA	NA	NA	NA	NA	2.24093e-07	1.23058e-07	7.36084e-07	NA	NA	3.16708e-07	intronic	LOC529930
16	19959522	NA	1.1001e-07	NA	NA	NA	NA	NA	NA	NA	NA	NA	NA	NA	NA	NA	intronic	ESRRG
16	23392547	NA	NA	NA	NA	9.50094e-07	NA	NA	NA	NA	NA	NA	NA	NA	NA	NA	intergenic	LYPLAL1,SLC30A10
16	26911112	NA	NA	NA	4.01555e-07	4.84664e-07	NA	NA	NA	NA	NA	NA	NA	NA	NA	NA	intergenic	CCDC185,CAPN8
16	26943949	NA	NA	NA	6.04697e-07	NA	NA	NA	NA	NA	NA	NA	NA	NA	NA	NA	intergenic	CCDC185,CAPN8
16	27219229	NA	NA	NA	7.73228e-08	NA	9.92452e-07	NA	NA	NA	NA	NA	NA	NA	NA	NA	intergenic	TP53BP2,FBXO28
16	29072823	NA	2.65442e-10	4.47047e-09	1.50869e-08	5.00497e-08	3.50429e-09	NA	2.13525e-07	NA	3.14885e-07	2.46016e-07	NA	NA	NA	9.26339e-10	intergenic	SDE2,H3F3A
16	29093654	NA	NA	NA	NA	NA	NA	NA	6.8366e-07	NA	NA	NA	NA	NA	NA	NA	intergenic	H3F3A,LOC112441807
16	31393239	NA	NA	NA	NA	NA	NA	NA	NA	NA	NA	NA	NA	9.4553e-07	NA	NA	intronic	SMYD3
16	31712851	NA	NA	NA	NA	NA	NA	NA	NA	NA	NA	NA	NA	NA	2.74925e-07	NA	intronic	KIF26B
16	33057598	NA	NA	NA	NA	8.58583e-07	NA	NA	NA	NA	NA	NA	NA	NA	NA	NA	intergenic	C16H1orf100,ZBTB18
16	35142882	NA	NA	8.06454e-08	NA	NA	NA	NA	NA	NA	NA	NA	NA	NA	NA	NA	intronic	CHML
16	38906030	NA	NA	8.23946e-07	NA	NA	NA	NA	NA	NA	NA	NA	NA	NA	NA	NA	intergenic	FMO4,PRRC2C
16	40301155	NA	NA	NA	NA	7.66703e-07	NA	NA	NA	NA	NA	NA	NA	NA	NA	NA	intergenic	TRNAC-ACA,TNFSF18
16	40419315	NA	1.70522e-07	2.95362e-07	NA	NA	4.00461e-07	NA	NA	NA	NA	NA	NA	NA	NA	NA	intergenic	TRNAC-ACA,TNFSF18
16	40946706	NA	NA	6.63177e-07	NA	NA	NA	NA	NA	NA	NA	NA	NA	NA	NA	NA	intergenic	TNFSF4,AADACL4
16	40946767	NA	2.40359e-09	9.70163e-10	5.8303e-07	NA	1.10485e-07	NA	NA	NA	NA	NA	NA	NA	NA	NA	intergenic	TNFSF4,AADACL4
16	40982776	NA	NA	9.1816e-07	NA	NA	NA	NA	NA	NA	NA	NA	NA	NA	NA	NA	intergenic	TNFSF4,AADACL4
16	41092411	NA	NA	8.01747e-07	NA	NA	NA	NA	NA	NA	NA	NA	NA	NA	NA	NA	intergenic	AADACL4,DHRS3
16	41099558	NA	7.86518e-07	4.19472e-07	NA	NA	NA	NA	NA	NA	NA	NA	NA	NA	NA	NA	intergenic	AADACL4,DHRS3
16	41120297	NA	8.78524e-07	5.4569e-07	NA	NA	NA	NA	NA	NA	NA	NA	NA	NA	NA	NA	intronic	DHRS3
16	41181453	NA	NA	8.06153e-07	NA	NA	NA	NA	NA	NA	NA	NA	NA	NA	NA	NA	intergenic	DHRS3,VPS13D
16	41203357	NA	5.36963e-09	2.70577e-09	NA	NA	9.22366e-08	NA	NA	NA	NA	NA	NA	NA	NA	NA	intergenic	DHRS3,VPS13D
16	41205244	NA	NA	1.31225e-07	NA	NA	NA	NA	NA	NA	NA	NA	NA	NA	NA	NA	downstream	VPS13D
16	41282190	NA	NA	5.00449e-07	NA	NA	NA	NA	NA	NA	NA	NA	NA	NA	NA	NA	intronic	VPS13D
16	41414352	NA	NA	7.03338e-07	NA	NA	NA	NA	NA	NA	NA	NA	NA	NA	NA	NA	intronic	VPS13D
16	42768628	NA	NA	NA	NA	NA	NA	NA	NA	NA	NA	NA	NA	NA	5.03754e-07	NA	intergenic	TARDBP,CASZ1
16	42770072	NA	NA	NA	8.5293e-07	NA	NA	NA	NA	NA	NA	NA	NA	NA	NA	NA	intergenic	TARDBP,CASZ1
16	42818525	NA	NA	NA	7.51511e-07	9.56417e-08	3.31518e-07	NA	NA	NA	NA	NA	NA	NA	NA	NA	intronic	CASZ1
16	43028651	NA	NA	NA	NA	3.07016e-07	NA	NA	NA	NA	NA	NA	NA	NA	NA	NA	intronic	PEX14
16	43044691	NA	3.83676e-07	NA	NA	NA	NA	NA	NA	NA	NA	NA	NA	NA	NA	NA	intronic	PEX14
16	44181084	NA	5.11881e-07	NA	NA	NA	NA	NA	NA	NA	NA	NA	NA	NA	NA	NA	intronic	SPSB1
16	44230228	NA	9.7007e-07	3.82202e-07	NA	NA	NA	NA	NA	NA	NA	NA	NA	NA	NA	NA	intronic	SPSB1
16	44505864	NA	6.31054e-08	5.78523e-07	NA	NA	NA	NA	NA	NA	NA	NA	NA	NA	NA	NA	intergenic	CA6,ENO1
16	44506801	NA	5.62925e-08	NA	NA	NA	NA	NA	NA	NA	NA	NA	NA	NA	NA	NA	intergenic	CA6,ENO1
16	44508663	NA	3.67632e-07	NA	NA	NA	NA	NA	NA	NA	NA	NA	NA	NA	NA	NA	intergenic	CA6,ENO1
16	45089167	NA	6.88621e-07	8.8287e-07	NA	NA	NA	NA	NA	NA	NA	NA	NA	NA	NA	NA	intergenic	SLC45A1,LOC786597
16	45191257	NA	3.85996e-08	NA	NA	NA	NA	NA	NA	NA	NA	NA	NA	NA	NA	NA	intergenic	LOC786597,ERRFI1
16	45236633	NA	6.46317e-09	3.61295e-08	NA	NA	2.59988e-07	NA	NA	NA	NA	NA	NA	NA	NA	NA	intergenic	LOC786597,ERRFI1
16	45249158	NA	4.8648e-07	NA	NA	NA	NA	NA	NA	NA	NA	NA	NA	NA	NA	NA	intergenic	LOC786597,ERRFI1
16	45249575	NA	NA	NA	NA	9.4845e-07	NA	NA	NA	NA	NA	NA	NA	NA	NA	NA	intergenic	LOC786597,ERRFI1
16	45819687	NA	NA	NA	7.60436e-07	8.83944e-07	NA	NA	NA	NA	NA	NA	NA	NA	NA	NA	intronic	CAMTA1
16	45850578	NA	NA	4.77485e-07	2.43071e-08	1.21383e-07	1.03307e-07	NA	NA	NA	NA	NA	NA	NA	NA	NA	intronic	CAMTA1
16	45861296	NA	NA	NA	3.6191e-07	NA	NA	NA	NA	NA	NA	NA	NA	NA	NA	NA	intronic	CAMTA1
16	45868151	NA	NA	NA	7.1791e-07	9.32316e-07	NA	NA	NA	NA	NA	NA	NA	NA	NA	NA	intronic	CAMTA1
16	46139288	NA	NA	NA	1.95657e-07	1.47688e-09	1.59961e-07	NA	NA	NA	4.18814e-07	1.86274e-07	NA	NA	NA	NA	intronic	CAMTA1
16	46172906	NA	NA	7.62112e-07	NA	NA	NA	NA	NA	NA	NA	NA	NA	NA	NA	NA	intronic	CAMTA1
16	46191404	NA	NA	4.13523e-07	1.7984e-08	8.82987e-09	1.15888e-08	NA	NA	NA	5.2749e-07	1.70557e-07	NA	NA	NA	NA	intronic	CAMTA1
16	46649602	NA	NA	NA	3.2546e-08	5.25787e-07	2.04505e-07	NA	NA	NA	NA	NA	NA	NA	NA	NA	intergenic	CAMTA1,DNAJC11
16	46683324	NA	NA	NA	NA	NA	NA	NA	NA	NA	NA	NA	NA	NA	3.9039e-07	NA	intergenic	CAMTA1,DNAJC11
16	46689412	NA	NA	NA	NA	NA	NA	NA	NA	NA	NA	NA	NA	NA	1.36221e-07	NA	intergenic	CAMTA1,DNAJC11
16	47466518	NA	NA	NA	8.20596e-08	NA	8.07307e-07	NA	NA	NA	NA	NA	NA	NA	NA	NA	intergenic	NPHP4,AJAP1
16	47467909	NA	6.07655e-07	9.22388e-07	9.49971e-07	NA	3.79968e-07	NA	NA	NA	NA	NA	NA	NA	NA	NA	intergenic	NPHP4,AJAP1
16	47492952	NA	NA	NA	2.2808e-07	NA	NA	NA	NA	NA	NA	NA	NA	NA	NA	NA	intergenic	NPHP4,AJAP1
16	47622731	NA	NA	NA	NA	NA	NA	4.61683e-07	NA	NA	NA	NA	NA	NA	NA	NA	intergenic	NPHP4,AJAP1
16	47625587	NA	NA	NA	3.80278e-07	2.42156e-07	7.46628e-07	NA	NA	NA	NA	NA	NA	NA	NA	NA	intergenic	NPHP4,AJAP1
16	47760925	NA	NA	NA	5.59178e-08	8.47163e-07	5.74732e-07	NA	NA	NA	NA	NA	NA	NA	NA	NA	intergenic	NPHP4,AJAP1
16	47770620	NA	NA	NA	NA	3.48961e-07	NA	NA	NA	NA	NA	NA	NA	NA	NA	NA	intergenic	NPHP4,AJAP1
16	48274724	NA	NA	NA	NA	NA	NA	NA	NA	NA	NA	NA	NA	NA	6.19083e-07	NA	intergenic	NPHP4,AJAP1
16	48276308	NA	NA	NA	2.84464e-07	NA	NA	NA	NA	NA	NA	NA	NA	NA	NA	NA	intergenic	NPHP4,AJAP1
16	48283822	NA	NA	1.30426e-07	4.83896e-08	8.08203e-07	6.77645e-08	NA	NA	NA	NA	NA	NA	NA	NA	NA	intergenic	NPHP4,AJAP1
16	48306301	NA	NA	NA	8.68706e-08	NA	7.53806e-07	NA	NA	NA	NA	NA	NA	NA	NA	NA	intergenic	NPHP4,AJAP1
16	48430595	NA	NA	NA	NA	NA	7.29799e-07	NA	NA	NA	NA	NA	NA	NA	NA	NA	intergenic	NPHP4,AJAP1
16	48998857	NA	NA	NA	7.54878e-07	NA	NA	NA	NA	NA	NA	NA	NA	NA	NA	NA	intergenic	AJAP1,C16H1orf174
16	50371968	NA	NA	6.95387e-07	NA	NA	NA	NA	NA	NA	NA	NA	NA	NA	NA	NA	intronic	PLCH2
16	50820793	NA	NA	NA	NA	NA	NA	NA	NA	NA	NA	NA	NA	5.84481e-08	NA	NA	intronic	CFAP74
16	50827373	NA	NA	NA	NA	NA	NA	NA	NA	NA	NA	NA	NA	7.148e-08	NA	NA	intronic	CFAP74
16	50832938	NA	NA	NA	NA	NA	NA	NA	NA	NA	NA	NA	NA	5.97311e-07	NA	NA	upstream	TMEM52
16	51481342	NA	NA	NA	8.2835e-07	NA	NA	NA	NA	NA	NA	NA	NA	NA	NA	NA	downstream	HES4
16	52113408	NA	NA	NA	7.15294e-09	3.17521e-08	5.3435e-08	NA	NA	NA	NA	NA	NA	NA	NA	NA	intronic	FHAD1
16	52308318	NA	3.668e-07	NA	6.90749e-07	NA	2.05036e-07	NA	NA	NA	NA	NA	NA	NA	NA	NA	intronic	TMEM51
16	52341837	NA	NA	8.77364e-07	NA	NA	NA	NA	NA	NA	NA	NA	NA	NA	NA	NA	intronic	TMEM51
16	52463025	NA	NA	NA	NA	7.9525e-08	NA	NA	NA	NA	NA	NA	NA	NA	NA	NA	intronic	KAZN
16	53062749	NA	NA	6.61404e-07	2.0194e-07	NA	3.09688e-07	NA	NA	NA	NA	NA	NA	NA	NA	NA	intergenic	KAZN,LOC112441849
16	53177613	NA	NA	NA	NA	NA	NA	NA	NA	NA	NA	NA	NA	NA	6.06966e-09	NA	intergenic	KAZN,LOC112441849
16	53551316	NA	NA	NA	1.90652e-07	NA	6.06266e-07	NA	NA	NA	NA	NA	NA	NA	NA	NA	intronic	LOC112441849
16	54150080	NA	1.08636e-07	2.45498e-08	6.71698e-07	NA	4.31021e-07	NA	NA	NA	NA	NA	NA	NA	NA	NA	intergenic	LRRC38,LOC529969
16	54182287	NA	6.72474e-07	1.73229e-07	6.2647e-07	NA	NA	NA	NA	NA	NA	NA	NA	NA	NA	NA	intergenic	LRRC38,LOC529969
16	54183880	NA	NA	9.15101e-07	NA	NA	NA	NA	NA	NA	NA	NA	NA	NA	NA	NA	intergenic	LRRC38,LOC529969
16	54316464	NA	1.50207e-07	1.77736e-08	1.6209e-07	NA	1.62494e-07	NA	NA	NA	NA	NA	NA	NA	NA	NA	upstream	LOC107133242
16	54322700	NA	4.96424e-07	2.14221e-07	NA	NA	NA	NA	NA	NA	NA	NA	NA	NA	NA	NA	intergenic	LOC107133242,LOC530668
16	54325553	NA	1.72605e-07	8.11078e-08	1.57738e-07	9.2934e-07	9.80508e-08	NA	NA	NA	NA	NA	NA	NA	NA	NA	intergenic	LOC107133242,LOC530668
16	54334310	NA	2.3062e-07	9.73612e-08	NA	NA	NA	NA	NA	NA	NA	NA	NA	NA	NA	NA	exonic	LOC530668
16	54367611	NA	8.77076e-08	1.05646e-07	NA	NA	2.57704e-07	NA	NA	NA	NA	NA	NA	NA	NA	NA	intergenic	LOC530668,LOC789138
16	54382192	NA	NA	9.34706e-07	NA	NA	NA	NA	NA	NA	NA	NA	NA	NA	NA	NA	intergenic	LOC789138,LOC517884
16	54382431	NA	3.00167e-07	3.86848e-07	NA	NA	8.80433e-07	NA	NA	NA	NA	NA	NA	NA	NA	NA	intergenic	LOC789138,LOC517884
16	55853318	NA	NA	7.27604e-07	NA	NA	NA	NA	NA	NA	NA	NA	NA	NA	NA	NA	intergenic	GPR52,RABGAP1L
16	55996830	NA	9.58669e-07	7.3435e-07	NA	NA	NA	NA	NA	NA	NA	NA	NA	NA	NA	NA	intergenic	GPR52,RABGAP1L
16	56372848	NA	NA	NA	NA	4.70345e-07	5.92878e-07	NA	NA	NA	NA	NA	NA	NA	NA	NA	intronic	TNN
16	56372860	NA	NA	NA	NA	4.70345e-07	5.92878e-07	NA	NA	NA	NA	NA	NA	NA	NA	NA	intronic	TNN
16	58629014	NA	NA	NA	NA	NA	NA	NA	NA	NA	NA	NA	NA	7.51094e-07	NA	NA	intergenic	BRINP2,TRNAG-CCC
16	60800322	NA	NA	NA	NA	NA	NA	NA	NA	NA	NA	NA	NA	3.94264e-07	NA	NA	intronic	NPHS2
16	61494773	NA	NA	NA	NA	NA	NA	NA	NA	NA	NA	NA	NA	7.71079e-07	NA	NA	intronic	ACBD6
16	62091299	NA	NA	NA	NA	NA	NA	NA	NA	NA	NA	NA	NA	9.03358e-07	NA	NA	intergenic	KIAA1614,STX6
16	62484523	NA	NA	NA	NA	NA	NA	NA	NA	NA	NA	NA	NA	4.4467e-07	NA	NA	intergenic	IER5,CACNA1E
16	62498715	NA	NA	NA	NA	NA	NA	NA	NA	NA	NA	NA	NA	3.21315e-07	NA	NA	intergenic	IER5,CACNA1E
16	64134822	NA	3.16123e-07	NA	NA	NA	NA	NA	NA	NA	NA	NA	NA	NA	NA	NA	intronic	LAMC1
16	64347221	NA	9.89906e-07	NA	NA	NA	NA	NA	NA	NA	NA	NA	NA	NA	NA	NA	intronic	NMNAT2
16	64348574	NA	7.38657e-07	NA	NA	NA	NA	NA	NA	NA	NA	NA	NA	NA	NA	NA	intronic	NMNAT2
16	67181219	NA	4.37967e-07	NA	NA	NA	NA	NA	NA	NA	NA	NA	NA	NA	NA	NA	intronic	HMCN1
16	67268082	NA	1.69019e-07	NA	NA	NA	NA	NA	NA	NA	NA	NA	NA	NA	NA	NA	intergenic	HMCN1,PRG4
16	70283775	NA	4.57579e-07	NA	NA	NA	NA	NA	NA	NA	NA	NA	NA	NA	NA	NA	intergenic	PROX1,RPS6KC1
16	70286984	NA	9.25242e-08	1.10052e-08	8.38752e-09	NA	3.92478e-08	NA	NA	NA	NA	NA	NA	NA	NA	NA	intergenic	PROX1,RPS6KC1
16	70287839	NA	NA	7.11642e-07	NA	NA	NA	NA	NA	NA	NA	NA	NA	NA	NA	NA	intergenic	PROX1,RPS6KC1
16	70290119	NA	4.68126e-08	1.48725e-07	NA	NA	NA	NA	NA	NA	NA	NA	NA	NA	NA	NA	intergenic	PROX1,RPS6KC1
16	71994395	NA	NA	NA	2.41567e-07	NA	NA	NA	NA	NA	NA	NA	NA	NA	NA	NA	intergenic	RD3,TRAF5
16	72230737	NA	4.41855e-08	3.95549e-08	1.49666e-08	4.00505e-08	1.64225e-08	NA	NA	NA	NA	NA	NA	NA	NA	NA	intronic	KCNH1
16	72290017	NA	NA	NA	2.83916e-07	NA	NA	NA	NA	NA	NA	NA	NA	NA	NA	NA	intronic	KCNH1
16	73283910	NA	NA	NA	NA	NA	NA	NA	NA	NA	8.87449e-07	NA	NA	NA	NA	NA	intronic	SYT14
16	73293073	NA	NA	NA	3.71462e-07	1.3389e-08	5.70241e-07	NA	NA	NA	3.65671e-07	1.84831e-07	NA	NA	NA	NA	intronic	SYT14
16	73293116	NA	NA	NA	6.07329e-08	9.56396e-09	7.92117e-08	NA	NA	NA	5.33948e-07	4.40733e-07	NA	NA	NA	NA	intronic	SYT14
16	73296955	NA	NA	NA	NA	7.1815e-07	NA	NA	NA	NA	NA	NA	NA	NA	NA	NA	intronic	SYT14
16	73304620	NA	NA	NA	NA	NA	NA	NA	NA	NA	1.73061e-07	NA	NA	NA	NA	8.52973e-07	intronic	SYT14
16	73304679	NA	NA	NA	NA	NA	NA	NA	NA	NA	4.8894e-07	NA	NA	NA	NA	NA	intronic	SYT14
16	73307313	NA	NA	NA	7.4668e-07	NA	NA	NA	NA	NA	NA	NA	NA	NA	NA	NA	intronic	SYT14
16	73307958	NA	NA	NA	NA	9.48456e-07	NA	NA	NA	NA	NA	NA	NA	NA	NA	NA	intronic	SYT14
16	73411966	NA	NA	NA	4.21258e-07	1.97176e-08	6.27082e-07	NA	NA	NA	5.33491e-07	2.53905e-07	NA	NA	NA	NA	intergenic	SYT14,UTP25
16	73413649	NA	NA	NA	NA	2.85402e-07	NA	NA	NA	NA	NA	6.56662e-07	NA	NA	NA	NA	intergenic	SYT14,UTP25
16	73417513	NA	NA	NA	NA	4.90306e-07	NA	NA	NA	NA	NA	NA	NA	NA	NA	NA	intergenic	SYT14,UTP25
16	73420129	NA	NA	NA	1.50488e-07	5.73373e-09	2.30346e-07	NA	NA	NA	9.92125e-08	3.13885e-08	NA	NA	NA	NA	intergenic	SYT14,UTP25
16	73427688	NA	NA	NA	NA	4.67252e-07	NA	NA	NA	NA	NA	NA	NA	NA	NA	NA	intergenic	SYT14,UTP25
16	73681313	NA	NA	NA	5.20846e-07	NA	NA	NA	NA	NA	NA	NA	NA	NA	NA	NA	intronic	LAMB3
16	73717109	NA	NA	NA	NA	7.63113e-07	NA	NA	NA	NA	4.09828e-07	NA	NA	NA	NA	7.07644e-07	intronic	CAMK1G
16	73719779	NA	NA	NA	NA	NA	NA	NA	NA	NA	2.66657e-07	NA	NA	NA	NA	NA	intronic	CAMK1G
16	73720449	NA	NA	NA	NA	3.87237e-07	NA	NA	NA	NA	NA	NA	NA	NA	NA	NA	intronic	CAMK1G
16	73721141	NA	NA	7.56499e-07	NA	8.43006e-08	2.7483e-07	NA	NA	NA	3.83465e-07	1.67166e-07	NA	NA	NA	2.8587e-07	intronic	CAMK1G
16	73722229	NA	NA	NA	8.96396e-07	NA	NA	NA	NA	NA	NA	NA	NA	NA	NA	NA	intronic	CAMK1G
16	73725811	NA	NA	1.31111e-09	2.89593e-09	2.41485e-07	8.90464e-09	NA	NA	NA	8.52252e-07	NA	NA	NA	NA	NA	intronic	CAMK1G
16	73732982	NA	NA	NA	NA	NA	NA	NA	NA	NA	3.51224e-07	NA	NA	NA	NA	NA	intronic	CAMK1G
16	73733047	NA	NA	NA	NA	4.53893e-07	NA	NA	NA	NA	2.02211e-07	5.75785e-07	NA	NA	NA	NA	intronic	CAMK1G
16	73866835	NA	NA	NA	NA	NA	NA	NA	NA	NA	NA	2.67274e-07	NA	NA	NA	NA	intergenic	CAMK1G,MIR205
16	73872280	NA	NA	NA	NA	NA	NA	NA	NA	NA	NA	NA	1.50566e-07	NA	NA	NA	intergenic	CAMK1G,MIR205
16	73889292	NA	NA	NA	NA	NA	NA	NA	NA	NA	5.1388e-07	NA	NA	NA	NA	NA	intergenic	CAMK1G,MIR205
16	73894131	NA	4.757e-07	NA	NA	NA	NA	NA	NA	NA	NA	NA	NA	NA	NA	NA	intergenic	CAMK1G,MIR205
16	73975559	NA	NA	7.99546e-07	NA	NA	NA	NA	NA	NA	9.3681e-08	NA	NA	NA	NA	NA	intergenic	MIR205,TRNAW-CCA
16	73984078	NA	7.35753e-07	8.51676e-07	NA	NA	NA	NA	NA	NA	NA	NA	NA	NA	NA	NA	intergenic	MIR205,TRNAW-CCA
16	74254032	NA	7.32894e-08	2.2854e-07	NA	NA	4.49482e-07	NA	6.6864e-07	NA	8.28363e-09	NA	NA	NA	NA	1.66617e-07	intergenic	MIR205,TRNAW-CCA
16	74254046	NA	NA	NA	NA	NA	NA	NA	NA	NA	5.89993e-08	NA	NA	NA	NA	NA	intergenic	MIR205,TRNAW-CCA
16	74274991	NA	NA	NA	NA	NA	NA	NA	NA	NA	NA	NA	NA	NA	7.15653e-07	NA	intergenic	MIR205,TRNAW-CCA
16	74453258	NA	5.34195e-07	NA	NA	NA	NA	NA	NA	NA	NA	NA	NA	NA	NA	NA	intergenic	TRNAW-CCA,PLXNA2
16	74459395	NA	NA	NA	4.29809e-07	4.32106e-07	2.69389e-07	NA	NA	NA	3.10522e-07	6.67849e-07	NA	NA	NA	NA	intergenic	TRNAW-CCA,PLXNA2
16	74770674	NA	NA	NA	6.85749e-07	NA	NA	NA	NA	NA	NA	NA	NA	NA	NA	NA	intergenic	TRNAW-CCA,PLXNA2
16	74774554	NA	NA	NA	5.03251e-07	NA	NA	NA	NA	NA	NA	NA	NA	NA	NA	NA	intergenic	TRNAW-CCA,PLXNA2
16	76064579	NA	NA	NA	NA	NA	NA	NA	NA	NA	NA	8.52344e-07	NA	NA	NA	NA	intronic	ASPM
16	76180673	NA	6.96429e-09	3.28449e-09	NA	NA	8.35588e-07	NA	NA	NA	NA	NA	NA	NA	NA	NA	intergenic	ZBTB41,CRB1
16	76189849	NA	4.49351e-09	1.00507e-08	7.50518e-07	NA	6.05662e-08	NA	NA	NA	1.93344e-07	NA	NA	NA	NA	4.27146e-07	intronic	CRB1
16	76189902	NA	3.97071e-08	3.97781e-07	NA	NA	2.09206e-07	NA	NA	NA	4.3283e-08	2.88195e-07	NA	NA	NA	4.1117e-07	intronic	CRB1
16	76193868	NA	9.91827e-07	NA	NA	NA	NA	NA	NA	NA	1.83069e-07	NA	NA	NA	NA	NA	intronic	CRB1
16	76202968	NA	NA	NA	NA	NA	NA	NA	NA	NA	3.84187e-07	NA	NA	NA	NA	NA	intronic	CRB1
16	76205561	NA	6.77336e-07	NA	NA	NA	6.68364e-07	NA	NA	NA	2.11236e-07	4.02039e-07	NA	NA	NA	NA	intronic	CRB1
16	76226332	NA	1.24831e-07	1.51183e-07	NA	NA	6.97235e-07	NA	NA	NA	5.9792e-07	NA	NA	NA	NA	NA	intronic	CRB1
16	76519839	NA	NA	NA	NA	NA	NA	NA	NA	NA	7.81792e-07	NA	NA	NA	NA	NA	intronic	DENND1B
17	1870914	NA	5.45951e-07	NA	4.22543e-07	5.53496e-07	2.85732e-07	NA	NA	NA	1.38108e-07	1.43967e-07	NA	NA	NA	NA	intergenic	TLL1,MAP9
17	4020343	NA	NA	NA	NA	NA	NA	6.7683e-07	NA	NA	NA	NA	NA	NA	NA	NA	intronic	TMEM131L
17	4078257	NA	NA	NA	NA	1.71877e-07	6.38783e-07	NA	NA	NA	3.50489e-07	4.33182e-07	NA	NA	NA	NA	intronic	TMEM131L
17	4527144	NA	8.81918e-07	NA	NA	NA	NA	NA	NA	NA	NA	NA	NA	NA	NA	NA	intergenic	TRIM2,FHDC1
17	4529331	NA	8.9341e-07	NA	NA	NA	NA	NA	NA	NA	NA	NA	NA	NA	NA	NA	intergenic	TRIM2,FHDC1
17	6324027	NA	NA	8.74249e-07	NA	NA	NA	NA	NA	NA	NA	NA	NA	NA	NA	NA	intronic	FAM160A1
17	6324032	NA	NA	8.74249e-07	NA	NA	NA	NA	NA	NA	NA	NA	NA	NA	NA	NA	intronic	FAM160A1
17	7026851	NA	NA	NA	NA	NA	NA	NA	NA	NA	NA	NA	NA	NA	7.38959e-08	NA	intronic	LRBA
17	7199205	NA	3.42414e-07	NA	NA	NA	NA	NA	NA	NA	NA	NA	NA	NA	NA	NA	intronic	LRBA
17	9080745	NA	5.56778e-07	NA	NA	NA	NA	NA	NA	NA	NA	NA	NA	NA	NA	NA	intergenic	TRNAC-GCA,NR3C2
17	9619622	NA	3.7359e-07	NA	6.09961e-08	8.04823e-08	5.51902e-08	NA	NA	NA	2.17303e-07	3.57721e-08	NA	NA	NA	4.19482e-07	intronic	NR3C2
17	9644709	NA	NA	NA	NA	3.82238e-07	7.14207e-07	NA	NA	NA	6.72235e-07	5.43918e-08	NA	NA	NA	NA	intronic	NR3C2
17	10245458	NA	9.15542e-07	NA	NA	NA	NA	NA	NA	NA	NA	NA	NA	NA	NA	NA	intronic	ARHGAP10
17	10256841	NA	NA	7.5788e-07	NA	NA	NA	NA	NA	NA	NA	NA	NA	NA	NA	NA	intronic	ARHGAP10
17	12547592	NA	NA	NA	3.56799e-07	NA	NA	NA	NA	NA	NA	NA	NA	NA	NA	NA	intronic	ZNF827
17	12642219	NA	5.39087e-07	NA	NA	NA	NA	NA	NA	NA	NA	NA	NA	NA	NA	NA	intergenic	C17H4orf51,MMAA
17	12642226	NA	9.12715e-08	2.89206e-07	NA	NA	NA	NA	NA	NA	NA	NA	NA	NA	NA	NA	intergenic	C17H4orf51,MMAA
17	12643638	NA	6.95849e-07	NA	NA	NA	NA	NA	NA	NA	NA	NA	NA	NA	NA	NA	intergenic	C17H4orf51,MMAA
17	12734105	NA	2.60381e-07	7.26252e-07	NA	NA	NA	NA	NA	NA	NA	NA	NA	NA	NA	NA	intergenic	MMAA,SMAD1
17	12738890	NA	NA	1.04502e-07	7.5639e-07	NA	NA	NA	NA	NA	NA	NA	NA	NA	NA	NA	intergenic	MMAA,SMAD1
17	12753063	NA	NA	8.74555e-07	NA	NA	NA	NA	NA	NA	NA	NA	NA	NA	NA	NA	intronic	SMAD1
17	12756090	NA	9.39188e-08	7.16061e-08	2.76135e-07	NA	1.08089e-07	NA	NA	NA	NA	NA	NA	NA	NA	NA	intronic	SMAD1
17	12757761	NA	3.69329e-08	NA	NA	7.49789e-07	2.08296e-07	NA	NA	NA	NA	NA	NA	NA	NA	NA	intronic	SMAD1
17	12757808	NA	6.60815e-08	NA	NA	NA	2.69231e-07	NA	NA	NA	NA	NA	NA	NA	NA	NA	exonic	SMAD1
17	15232531	NA	NA	NA	NA	7.96607e-08	NA	NA	NA	NA	NA	NA	NA	NA	NA	NA	intronic	LOC112442091
17	30153537	1.72673e-07	NA	NA	NA	NA	NA	NA	NA	NA	NA	NA	NA	NA	NA	NA	intergenic	INTU,NONE
17	31508855	NA	NA	NA	NA	NA	NA	NA	NA	NA	NA	NA	NA	NA	8.41848e-07	NA	intergenic	INTU,FAT4
17	33477656	NA	4.63155e-07	NA	2.52324e-07	5.16012e-07	3.2819e-07	NA	NA	NA	NA	NA	NA	NA	NA	NA	intergenic	ANKRD50,SPRY1
17	34237910	NA	1.54055e-07	NA	NA	NA	NA	NA	NA	NA	NA	NA	NA	NA	NA	NA	intergenic	ANKRD50,SPRY1
17	36353822	NA	1.03721e-07	NA	2.12318e-07	NA	2.56297e-07	NA	NA	NA	NA	NA	NA	NA	NA	NA	intronic	FSTL5
17	37006124	NA	8.33394e-07	NA	NA	NA	NA	NA	NA	NA	NA	NA	NA	NA	NA	NA	intronic	FSTL5
17	37506791	NA	NA	NA	NA	NA	NA	NA	NA	NA	NA	NA	NA	NA	2.15413e-07	NA	intergenic	FSTL5,NONE
17	37648967	NA	2.33789e-07	2.9637e-07	6.71269e-08	NA	7.32875e-08	NA	NA	NA	NA	NA	NA	NA	NA	NA	intergenic	FSTL5,RAPGEF2
17	37664204	NA	9.42147e-07	5.88154e-08	2.838e-08	3.06768e-07	6.87998e-08	NA	NA	NA	NA	NA	NA	NA	NA	5.82621e-07	intergenic	FSTL5,RAPGEF2
17	38388589	NA	NA	NA	2.46881e-07	NA	7.87503e-07	NA	NA	NA	NA	NA	NA	NA	NA	NA	intergenic	FSTL5,RAPGEF2
17	38687472	NA	NA	5.39383e-07	NA	NA	NA	NA	NA	NA	NA	NA	NA	NA	NA	NA	intergenic	FSTL5,RAPGEF2
17	38706260	NA	NA	NA	7.88622e-07	NA	NA	NA	NA	NA	NA	NA	NA	NA	NA	NA	intergenic	FSTL5,RAPGEF2
17	38855525	NA	NA	NA	NA	NA	NA	NA	NA	NA	NA	NA	NA	NA	7.49662e-07	NA	intergenic	FSTL5,RAPGEF2
17	48226698	NA	NA	NA	NA	NA	NA	NA	NA	NA	NA	NA	NA	NA	5.86547e-07	NA	intronic	GLT1D1
17	50054438	NA	NA	NA	8.06513e-07	7.98236e-07	NA	NA	NA	NA	NA	NA	NA	NA	NA	NA	intergenic	TRNAC-GCA,TMEM132B
17	50155761	NA	NA	NA	NA	NA	NA	NA	NA	NA	NA	NA	NA	NA	5.37415e-07	NA	intergenic	TRNAC-GCA,TMEM132B
17	52163585	NA	4.56413e-07	NA	NA	NA	NA	NA	NA	NA	NA	NA	NA	NA	NA	NA	intergenic	SNRNP35,RILPL2
17	57619565	1.93909e-08	NA	NA	NA	NA	NA	NA	NA	NA	NA	NA	NA	NA	NA	NA	intronic	KSR2
17	65123159	NA	NA	NA	NA	NA	NA	NA	NA	NA	NA	NA	NA	NA	7.55623e-07	NA	intronic	KIAA1671
17	65196864	7.55258e-07	NA	NA	NA	NA	NA	NA	NA	NA	NA	NA	NA	NA	NA	NA	intronic	KIAA1671
17	71765340	5.78976e-07	NA	NA	NA	NA	NA	NA	NA	NA	NA	NA	NA	NA	NA	NA	intronic	BCR
18	934377	NA	NA	NA	NA	5.49786e-07	NA	NA	NA	NA	NA	NA	NA	NA	NA	NA	intergenic	LOC789753,UQCRFS1
18	4856976	NA	1.48527e-09	7.66528e-07	NA	NA	NA	NA	NA	NA	NA	NA	NA	NA	NA	NA	intergenic	ADAMTS18,NUDT7
18	7920232	NA	1.56874e-07	NA	NA	NA	NA	NA	NA	NA	NA	NA	NA	NA	NA	NA	intronic	BCO1
18	7947197	NA	NA	NA	NA	NA	NA	NA	NA	NA	NA	NA	NA	NA	6.59921e-07	NA	upstream	GAN
18	8037542	NA	NA	NA	NA	NA	NA	NA	NA	NA	NA	NA	NA	NA	3.05247e-07	NA	intergenic	GAN,CMIP
18	8998608	NA	NA	NA	NA	NA	NA	NA	NA	NA	NA	NA	NA	NA	3.0362e-07	NA	intergenic	MPHOSPH6,CDH13
18	10458868	NA	NA	NA	NA	NA	NA	8.76322e-07	NA	NA	NA	NA	NA	NA	NA	NA	intronic	DNAAF1
18	12072123	NA	NA	NA	NA	2.90591e-07	NA	NA	NA	NA	NA	7.63587e-07	NA	NA	NA	NA	intergenic	MIR2326,FOXF1
18	14125655	NA	NA	NA	4.48761e-08	1.2838e-09	2.23338e-08	NA	NA	NA	5.81317e-09	5.62994e-09	NA	NA	NA	1.07728e-07	intronic	CBFA2T3
18	14174277	NA	5.94998e-08	1.71355e-07	1.28382e-09	1.41371e-09	2.92286e-09	NA	NA	NA	9.10728e-08	7.3132e-08	NA	NA	NA	3.14181e-07	intergenic	CBFA2T3,ACSF3
18	14262108	NA	NA	NA	4.63894e-07	2.20147e-08	2.46966e-07	NA	NA	NA	4.41729e-07	1.89924e-07	NA	NA	NA	NA	intronic	CDH15
18	14280940	NA	NA	NA	NA	6.95723e-08	5.08974e-07	NA	NA	NA	2.25121e-07	2.57798e-07	NA	NA	NA	NA	intronic	SLC22A31
18	17646788	NA	NA	NA	NA	NA	NA	NA	NA	NA	NA	NA	6.42121e-07	NA	NA	NA	intergenic	N4BP1,CBLN1
18	23774149	8.95069e-07	NA	NA	NA	NA	NA	NA	NA	NA	NA	NA	NA	NA	NA	NA	intronic	MMP2
18	26924077	NA	5.78242e-07	NA	NA	NA	8.07712e-07	NA	NA	NA	NA	NA	NA	NA	NA	NA	intergenic	MIR2285N-4,TRNAW-CCA
18	26931114	NA	9.71252e-07	NA	NA	NA	NA	NA	NA	NA	NA	NA	NA	NA	NA	NA	intergenic	MIR2285N-4,TRNAW-CCA
18	39160809	NA	NA	NA	NA	5.29927e-07	NA	NA	NA	NA	NA	NA	NA	NA	NA	NA	intronic	IST1
18	41531300	NA	NA	NA	2.89819e-07	NA	NA	NA	NA	NA	NA	NA	NA	NA	NA	NA	intergenic	ZNF536,TSHZ3
18	58634011	NA	6.88689e-07	NA	NA	NA	NA	NA	NA	NA	NA	NA	NA	NA	NA	NA	intronic	LOC101904435
19	48153	NA	NA	NA	NA	NA	NA	NA	NA	2.16313e-07	NA	NA	NA	NA	NA	NA	intergenic	NONE,LOC531039
19	50278	NA	NA	NA	NA	NA	NA	NA	NA	NA	NA	4.53556e-07	NA	NA	NA	NA	intergenic	NONE,LOC531039
19	404845	NA	NA	NA	NA	NA	NA	NA	NA	NA	NA	NA	7.10678e-07	NA	NA	NA	intergenic	LOC524702,CA10
19	660430	NA	NA	NA	NA	NA	NA	NA	NA	NA	NA	NA	9.89937e-07	NA	NA	NA	intronic	CA10
19	5573905	NA	NA	NA	NA	NA	NA	NA	NA	NA	NA	NA	2.29153e-07	NA	NA	NA	intronic	MMD
19	5574985	NA	NA	NA	NA	NA	NA	NA	NA	NA	NA	NA	3.67671e-07	NA	NA	NA	intronic	MMD
19	5578892	NA	NA	NA	NA	NA	NA	NA	NA	NA	NA	NA	1.20797e-08	NA	NA	NA	intronic	MMD
19	5583013	NA	NA	NA	NA	NA	NA	NA	NA	NA	NA	NA	7.22883e-07	NA	NA	NA	intronic	MMD
19	5583778	NA	NA	NA	NA	NA	NA	NA	NA	NA	NA	NA	3.46782e-07	NA	NA	NA	intronic	MMD
19	5585758	NA	NA	NA	NA	NA	NA	NA	NA	NA	NA	NA	5.8476e-07	NA	NA	NA	intronic	MMD
19	5585771	NA	NA	NA	NA	NA	NA	NA	NA	NA	NA	NA	1.24117e-07	NA	NA	NA	intronic	MMD
19	5603673	NA	NA	NA	NA	NA	NA	NA	NA	NA	NA	NA	9.7183e-07	NA	NA	NA	intronic	MMD
19	5623869	NA	NA	NA	NA	NA	NA	NA	NA	NA	NA	NA	2.6537e-07	NA	NA	NA	intronic	MMD
19	5626280	NA	NA	NA	NA	NA	NA	NA	NA	NA	NA	NA	8.89431e-07	NA	NA	NA	intronic	MMD
19	5645102	NA	NA	NA	NA	NA	NA	NA	NA	NA	NA	NA	2.59309e-07	NA	NA	NA	intergenic	MMD,TMEM100
19	5645868	NA	NA	NA	NA	NA	NA	NA	NA	9.3282e-07	NA	NA	1.32521e-08	NA	NA	7.7093e-07	intergenic	MMD,TMEM100
19	5645886	NA	NA	NA	NA	NA	NA	NA	NA	NA	NA	NA	3.38895e-08	NA	NA	NA	intergenic	MMD,TMEM100
19	5645933	NA	NA	NA	NA	NA	NA	NA	NA	NA	NA	NA	2.04804e-08	NA	NA	NA	intergenic	MMD,TMEM100
19	5646009	NA	NA	NA	NA	NA	NA	NA	NA	NA	NA	3.63762e-07	1.19701e-09	NA	NA	6.63589e-07	intergenic	MMD,TMEM100
19	5646047	NA	NA	NA	NA	NA	NA	NA	NA	NA	NA	NA	3.72439e-07	NA	NA	NA	intergenic	MMD,TMEM100
19	5646130	NA	NA	NA	NA	NA	NA	NA	NA	NA	NA	NA	5.11443e-07	NA	NA	NA	intergenic	MMD,TMEM100
19	5647463	NA	NA	NA	NA	NA	NA	NA	NA	NA	NA	NA	1.66967e-07	NA	NA	NA	intergenic	MMD,TMEM100
19	5651107	NA	NA	NA	NA	NA	NA	NA	NA	NA	NA	NA	9.32053e-07	NA	NA	NA	intergenic	MMD,TMEM100
19	5652698	NA	NA	NA	NA	NA	NA	NA	NA	NA	NA	NA	2.25918e-07	NA	NA	NA	intergenic	MMD,TMEM100
19	5652699	NA	NA	NA	NA	NA	NA	NA	NA	NA	NA	NA	2.25918e-07	NA	NA	NA	intergenic	MMD,TMEM100
19	5652769	NA	NA	NA	NA	NA	NA	NA	NA	NA	NA	NA	4.8611e-09	NA	NA	NA	intergenic	MMD,TMEM100
19	5653354	NA	NA	NA	NA	NA	NA	NA	NA	NA	NA	NA	2.45014e-07	NA	NA	NA	intergenic	MMD,TMEM100
19	5655678	NA	NA	NA	NA	NA	NA	NA	NA	NA	NA	NA	8.37765e-07	NA	NA	NA	intergenic	MMD,TMEM100
19	5657671	NA	NA	NA	NA	NA	NA	NA	NA	NA	NA	NA	8.76012e-07	NA	NA	NA	intergenic	MMD,TMEM100
19	5686318	NA	NA	NA	NA	NA	NA	NA	NA	NA	NA	NA	3.16437e-07	NA	NA	NA	intergenic	MMD,TMEM100
19	5686320	NA	NA	NA	NA	NA	NA	NA	NA	NA	NA	NA	2.80965e-07	NA	NA	NA	intergenic	MMD,TMEM100
19	5691296	NA	NA	NA	NA	NA	NA	NA	NA	NA	NA	NA	8.27932e-07	NA	NA	NA	intergenic	MMD,TMEM100
19	5691298	NA	NA	NA	NA	NA	NA	NA	NA	NA	NA	NA	8.27932e-07	NA	NA	NA	intergenic	MMD,TMEM100
19	5691307	NA	NA	NA	NA	NA	NA	NA	NA	NA	NA	NA	8.27932e-07	NA	NA	NA	intergenic	MMD,TMEM100
19	5691454	NA	NA	NA	NA	NA	NA	NA	NA	NA	NA	NA	8.98229e-07	NA	NA	NA	intergenic	MMD,TMEM100
19	5851705	NA	NA	NA	2.59786e-07	8.59516e-08	8.26166e-07	NA	NA	NA	4.25843e-07	7.9812e-07	NA	NA	NA	NA	intergenic	MMD,TMEM100
19	6260562	NA	NA	NA	NA	NA	NA	NA	NA	NA	NA	NA	4.42969e-07	NA	NA	NA	intergenic	PCTP,LOC616574
19	6355044	NA	NA	NA	NA	NA	NA	NA	NA	NA	NA	NA	6.68728e-07	NA	NA	NA	intronic	LOC616574
19	6359097	NA	NA	NA	NA	NA	NA	NA	NA	NA	NA	4.49025e-07	1.15714e-09	NA	NA	8.66912e-07	intronic	LOC616574
19	6794725	NA	NA	NA	NA	NA	NA	NA	NA	NA	NA	NA	NA	NA	1.56715e-07	NA	intergenic	LOC528282,LOC527335
19	16002454	7.2291e-07	NA	NA	NA	NA	NA	NA	NA	NA	NA	NA	NA	NA	NA	NA	intergenic	CCL2,ASIC2
19	16459256	9.37768e-07	NA	NA	NA	NA	NA	NA	NA	NA	NA	NA	NA	NA	NA	NA	intronic	ASIC2
19	23340118	NA	NA	NA	NA	NA	NA	NA	NA	NA	NA	NA	NA	NA	3.61076e-08	NA	intronic	SGSM2
19	26032915	NA	NA	NA	NA	NA	NA	NA	NA	NA	NA	NA	3.70632e-07	NA	NA	NA	exonic	NLRP1
19	28302793	NA	2.77716e-07	5.12687e-07	2.44106e-07	NA	6.24773e-07	NA	NA	NA	NA	NA	NA	NA	NA	NA	exonic	PIK3R6
19	30211513	NA	NA	NA	NA	4.76339e-07	NA	NA	NA	NA	NA	2.37737e-07	1.19107e-08	NA	NA	6.25568e-07	intronic	SHISA6
19	35522507	NA	NA	NA	1.93751e-08	NA	1.70783e-07	NA	NA	NA	NA	NA	NA	NA	NA	NA	intronic	MBTD1
19	39522191	NA	NA	NA	NA	NA	NA	NA	NA	NA	NA	NA	NA	5.49226e-07	NA	NA	intronic	FBXO47
19	39555764	NA	NA	NA	NA	NA	NA	NA	NA	NA	NA	NA	NA	5.32094e-08	NA	NA	intergenic	FBXO47,PLXDC1
19	41159839	NA	2.16497e-07	4.30147e-09	2.47e-08	3.61095e-07	2.64741e-08	NA	NA	NA	NA	NA	NA	NA	NA	NA	intergenic	KRT23,KRT39
19	41159967	NA	NA	1.49318e-08	2.60924e-07	NA	4.14158e-07	NA	NA	NA	NA	NA	NA	NA	NA	NA	intergenic	KRT23,KRT39
19	41165935	NA	NA	3.48799e-07	6.51683e-07	NA	NA	NA	NA	NA	NA	NA	NA	NA	NA	NA	intronic	KRT39
19	46085878	NA	NA	NA	9.01207e-07	NA	NA	NA	NA	NA	NA	NA	NA	NA	NA	NA	intronic	KANSL1
19	46976208	NA	NA	NA	1.97464e-07	NA	NA	NA	NA	NA	NA	NA	NA	NA	NA	NA	intronic	TLK2
19	47443597	NA	NA	1.2381e-07	7.49938e-07	NA	NA	NA	NA	NA	NA	NA	NA	NA	NA	NA	intronic	TANC2
19	47531824	NA	NA	NA	9.27508e-07	8.97696e-07	NA	NA	NA	NA	NA	NA	NA	NA	NA	5.63159e-07	intronic	TANC2
19	59183658	NA	NA	NA	1.24733e-07	3.06244e-07	1.78805e-07	NA	NA	NA	NA	NA	NA	NA	NA	NA	intergenic	TRNAG-UCC,KCNJ2
19	59193348	NA	NA	NA	NA	NA	NA	NA	NA	NA	NA	NA	9.47077e-07	NA	NA	NA	intergenic	TRNAG-UCC,KCNJ2
19	59207580	NA	NA	NA	5.27887e-07	NA	NA	NA	NA	NA	NA	NA	NA	NA	NA	NA	intergenic	TRNAG-UCC,KCNJ2
19	60041785	NA	NA	NA	NA	NA	NA	NA	NA	NA	NA	4.78004e-07	NA	NA	NA	NA	intergenic	TRNAG-UCC,KCNJ2
20	550503	NA	NA	NA	1.56358e-07	NA	8.06741e-07	NA	NA	NA	NA	NA	NA	NA	NA	NA	intronic	SLIT3
20	868282	NA	NA	NA	NA	NA	NA	NA	NA	NA	NA	NA	NA	NA	9.44164e-07	NA	intronic	SLIT3
20	2235579	NA	9.38214e-07	NA	NA	NA	NA	NA	NA	NA	NA	NA	NA	NA	NA	NA	intronic	KCNIP1
20	2619088	NA	NA	NA	NA	NA	NA	NA	NA	NA	NA	3.89776e-07	NA	NA	NA	NA	intronic	KCNIP1
20	2636985	NA	2.78447e-09	4.44099e-07	NA	NA	1.26935e-07	NA	NA	NA	NA	NA	NA	NA	NA	NA	intronic	KCNIP1
20	2655587	NA	8.47378e-10	2.59674e-07	1.43161e-07	1.65339e-07	7.81335e-09	NA	NA	NA	5.4419e-07	3.09012e-07	NA	NA	NA	NA	intergenic	KCNIP1,GABRP
20	4435241	NA	NA	NA	5.96818e-07	NA	9.85292e-07	NA	NA	NA	NA	NA	NA	NA	NA	NA	intronic	NEURL1B
20	4460420	NA	7.00699e-07	NA	NA	NA	NA	NA	NA	NA	NA	NA	NA	NA	NA	NA	intergenic	NEURL1B,DUSP1
20	4967355	NA	1.04034e-07	8.58837e-07	2.20767e-08	4.04711e-07	2.55199e-08	NA	NA	NA	NA	NA	NA	NA	NA	NA	intergenic	NKX2-5,STC2
20	4991330	NA	2.35061e-08	NA	9.20674e-08	NA	8.46016e-08	NA	NA	NA	NA	NA	NA	NA	NA	NA	intergenic	NKX2-5,STC2
20	6749048	NA	NA	NA	NA	NA	NA	NA	NA	NA	NA	NA	NA	NA	2.81353e-10	NA	intronic	NSA2
20	6789017	NA	NA	NA	NA	NA	NA	NA	NA	NA	NA	NA	NA	NA	2.40856e-07	NA	intronic	GFM2
20	6808381	NA	NA	NA	NA	NA	NA	NA	NA	NA	NA	NA	NA	NA	7.86227e-08	NA	intronic	GFM2,HEXB
20	6819247	NA	NA	NA	NA	NA	NA	NA	NA	NA	NA	NA	NA	NA	4.75568e-08	NA	intronic	GFM2,HEXB
20	6819248	NA	NA	NA	NA	NA	NA	NA	NA	NA	NA	NA	NA	NA	4.75568e-08	NA	intronic	GFM2,HEXB
20	6826707	NA	NA	NA	NA	NA	NA	NA	NA	NA	NA	NA	NA	NA	5.91714e-08	NA	exonic	HEXB
20	11310346	NA	NA	NA	NA	NA	NA	NA	NA	NA	NA	3.61365e-07	NA	NA	NA	NA	intergenic	SLC30A5,PIK3R1
20	11323104	NA	NA	NA	NA	NA	NA	NA	NA	NA	NA	9.49396e-07	NA	NA	NA	NA	intergenic	SLC30A5,PIK3R1
20	11455583	NA	NA	NA	NA	NA	NA	NA	NA	NA	4.92827e-07	1.70158e-07	NA	NA	NA	NA	intronic	PIK3R1
20	12215800	NA	NA	NA	NA	4.43493e-07	NA	NA	NA	NA	NA	NA	NA	NA	NA	NA	intergenic	LOC101902172,CD180
20	12373062	NA	NA	NA	NA	2.87196e-07	NA	NA	NA	NA	4.89897e-07	NA	NA	NA	NA	NA	intergenic	LOC101902172,CD180
20	12561478	NA	NA	NA	8.00382e-08	8.75597e-08	3.09842e-07	NA	NA	NA	NA	1.73568e-07	NA	NA	NA	NA	intronic	MAST4
20	12562883	NA	NA	NA	8.07298e-07	3.51031e-07	NA	NA	NA	NA	NA	7.82565e-08	NA	NA	NA	NA	intronic	MAST4
20	12563558	NA	NA	NA	NA	NA	NA	NA	NA	NA	NA	1.78024e-07	NA	NA	NA	NA	intronic	MAST4
20	12563571	NA	NA	NA	NA	NA	NA	NA	NA	NA	NA	6.07473e-07	NA	NA	NA	NA	intronic	MAST4
20	12563986	NA	NA	NA	NA	NA	NA	NA	NA	NA	NA	7.02727e-07	NA	NA	NA	NA	intronic	MAST4
20	12565335	NA	NA	NA	NA	7.20616e-07	NA	NA	NA	NA	5.44226e-07	3.06225e-08	5.75777e-08	NA	NA	NA	intronic	MAST4
20	12565376	NA	NA	NA	NA	NA	NA	NA	NA	NA	NA	2.47095e-07	NA	NA	NA	NA	intronic	MAST4
20	12577443	NA	NA	NA	NA	3.54005e-07	NA	NA	NA	NA	NA	7.97545e-07	NA	NA	NA	NA	intronic	MAST4
20	12577444	NA	NA	NA	NA	3.54005e-07	NA	NA	NA	NA	NA	7.97545e-07	NA	NA	NA	NA	intronic	MAST4
20	12577456	NA	NA	NA	NA	5.49656e-07	NA	NA	NA	NA	NA	9.79682e-07	NA	NA	NA	NA	intronic	MAST4
20	12577958	NA	NA	NA	NA	NA	NA	NA	NA	NA	NA	8.3832e-07	NA	NA	NA	NA	intronic	MAST4
20	12609354	NA	NA	NA	NA	NA	NA	NA	NA	NA	NA	8.62371e-07	NA	NA	NA	NA	intronic	MAST4
20	14994972	NA	1.13361e-07	NA	3.72538e-09	5.02097e-09	2.41358e-09	NA	NA	NA	2.72648e-08	2.90219e-09	NA	NA	NA	5.03853e-07	intergenic	RGS7BP,RNF180
20	15141139	NA	8.84627e-07	NA	NA	NA	6.80689e-07	NA	NA	NA	NA	NA	NA	NA	NA	NA	intronic	RNF180
20	15147122	NA	NA	NA	3.26025e-07	1.4905e-07	4.99896e-07	NA	NA	NA	NA	NA	NA	NA	NA	NA	intronic	RNF180
20	15206464	NA	NA	NA	9.675e-07	9.06585e-07	NA	NA	NA	NA	NA	NA	NA	NA	NA	NA	intronic	RNF180
20	15258987	NA	NA	NA	NA	NA	NA	NA	NA	NA	NA	8.14014e-07	NA	NA	NA	NA	intronic	RNF180
20	15393739	NA	NA	NA	NA	NA	NA	NA	NA	NA	6.76201e-07	4.77291e-07	NA	NA	NA	NA	intergenic	RNF180,HTR1A
20	17412813	NA	NA	NA	NA	NA	NA	NA	NA	NA	NA	5.60129e-07	NA	NA	NA	NA	intergenic	KIF2A,TRNAR-GCG
20	17961391	NA	NA	NA	NA	7.23638e-07	NA	NA	NA	NA	3.18191e-07	3.80961e-07	NA	NA	NA	NA	intronic	ZSWIM6
20	19686828	NA	NA	NA	NA	NA	NA	NA	NA	NA	NA	NA	NA	NA	4.74397e-07	NA	intronic	PDE4D
20	19882060	NA	NA	NA	7.8469e-07	2.42094e-07	7.27196e-07	NA	NA	NA	NA	NA	NA	NA	NA	NA	intronic	PDE4D
20	24827872	NA	NA	NA	NA	NA	NA	NA	NA	NA	NA	NA	NA	NA	8.18639e-09	NA	intronic	ARL15
20	27040759	NA	NA	NA	NA	NA	NA	NA	NA	NA	NA	NA	NA	NA	9.46891e-08	NA	intergenic	ITGA1,ISL1
20	27967761	NA	NA	NA	NA	NA	NA	NA	NA	NA	NA	NA	NA	NA	9.20203e-07	NA	intergenic	ISL1,PARP8
20	27968134	NA	NA	NA	NA	NA	NA	NA	NA	NA	NA	NA	NA	NA	9.01894e-09	NA	intergenic	ISL1,PARP8
20	27968208	NA	NA	NA	NA	NA	NA	NA	NA	NA	NA	NA	NA	NA	9.09722e-07	NA	intergenic	ISL1,PARP8
20	31590114	NA	NA	NA	NA	NA	NA	NA	NA	NA	NA	NA	NA	NA	3.52004e-07	NA	intergenic	ZNF131,SELENOP
20	34484519	NA	NA	NA	NA	NA	NA	6.89543e-07	NA	NA	NA	NA	NA	NA	NA	NA	intergenic	TRNAE-CUC,DAB2
20	35639859	NA	NA	NA	NA	NA	NA	3.76568e-07	NA	NA	NA	NA	NA	NA	NA	NA	intergenic	OSMR,LIFR
20	57404130	NA	NA	NA	NA	NA	NA	NA	NA	NA	NA	NA	NA	NA	2.18165e-07	NA	intronic	FBXL7
20	57811632	2.37659e-08	NA	NA	NA	NA	NA	NA	NA	NA	NA	NA	NA	NA	NA	NA	intergenic	FBXL7,ANKH
20	69085841	NA	NA	NA	NA	NA	NA	NA	NA	NA	NA	NA	NA	NA	5.30334e-08	NA	intergenic	LOC101902976,IRX1
20	69085859	NA	NA	NA	NA	NA	NA	NA	NA	NA	NA	NA	NA	NA	4.7468e-09	NA	intergenic	LOC101902976,IRX1
20	71350218	NA	NA	NA	NA	NA	NA	NA	NA	NA	NA	NA	NA	8.34437e-07	NA	NA	intergenic	NKD2,TRIP13
21	4334989	NA	NA	NA	NA	NA	NA	NA	NA	NA	NA	2.2576e-07	NA	NA	NA	NA	intronic	GABRA5
21	4334996	NA	NA	NA	NA	NA	NA	NA	NA	NA	NA	1.96967e-07	NA	NA	NA	NA	intronic	GABRA5
21	4335169	NA	NA	NA	NA	5.88643e-07	6.10217e-07	NA	NA	NA	NA	2.8488e-07	NA	NA	NA	NA	intronic	GABRA5
21	9393608	NA	NA	NA	NA	NA	NA	NA	NA	NA	8.43942e-07	8.11029e-07	NA	NA	NA	NA	intergenic	ARRDC4,NR2F2
21	11723926	NA	4.67225e-08	1.12942e-07	9.3902e-08	NA	2.2032e-07	NA	NA	NA	NA	NA	NA	NA	NA	NA	intergenic	LOC101907985,MCTP2
21	12512252	NA	NA	NA	NA	NA	NA	NA	7.98924e-07	NA	NA	NA	NA	NA	NA	NA	intergenic	LOC101907985,MCTP2
21	13025562	NA	5.81121e-09	7.60832e-10	2.09994e-08	NA	3.27245e-08	NA	NA	NA	NA	NA	NA	NA	NA	NA	intergenic	MCTP2,RGMA
21	13025777	NA	2.36094e-07	1.9105e-08	6.75633e-07	NA	7.63978e-07	NA	NA	NA	NA	NA	NA	NA	NA	NA	intergenic	MCTP2,RGMA
21	13025864	NA	NA	NA	NA	NA	8.95321e-07	NA	NA	NA	NA	NA	NA	NA	NA	NA	intergenic	MCTP2,RGMA
21	13129275	NA	6.63953e-08	6.67299e-10	2.27709e-09	NA	9.71351e-09	NA	NA	NA	NA	NA	NA	NA	NA	NA	intergenic	MCTP2,RGMA
21	13203852	NA	NA	NA	6.27559e-07	NA	NA	NA	NA	NA	NA	NA	NA	NA	NA	NA	intergenic	MCTP2,RGMA
21	13238961	NA	NA	2.22112e-07	2.17212e-08	NA	2.09792e-07	NA	NA	NA	NA	NA	NA	NA	NA	NA	intergenic	MCTP2,RGMA
21	14139327	NA	NA	NA	NA	NA	NA	NA	NA	NA	NA	NA	NA	NA	3.89653e-08	NA	intergenic	CHD2,LOC112443130
21	14282229	NA	NA	NA	8.73211e-07	NA	NA	NA	NA	NA	NA	NA	NA	NA	NA	NA	intergenic	LOC112443130,FAM174B
21	14298706	NA	NA	NA	NA	NA	NA	NA	NA	NA	NA	NA	NA	NA	2.48418e-07	NA	intergenic	LOC112443130,FAM174B
21	14408004	8.60693e-09	NA	NA	NA	NA	NA	NA	NA	NA	NA	NA	NA	NA	NA	NA	intergenic	FAM174B,ST8SIA2
21	14983928	NA	NA	NA	4.18525e-08	NA	NA	NA	NA	NA	NA	NA	NA	NA	NA	NA	intronic	SLCO3A1
21	14984222	NA	NA	NA	9.76928e-08	NA	NA	NA	NA	NA	NA	NA	NA	NA	NA	NA	intronic	SLCO3A1
21	14984281	NA	NA	NA	2.74087e-09	2.89974e-07	1.39278e-07	NA	NA	NA	NA	NA	NA	NA	NA	NA	intronic	SLCO3A1
21	14984289	NA	NA	NA	9.07707e-10	1.25043e-07	5.68367e-08	NA	NA	NA	NA	NA	NA	NA	NA	NA	intronic	SLCO3A1
21	14984384	NA	NA	NA	1.6492e-07	NA	NA	NA	NA	NA	NA	NA	NA	NA	NA	NA	intronic	SLCO3A1
21	14984395	NA	NA	NA	2.09878e-08	NA	7.23366e-07	NA	NA	NA	NA	NA	NA	NA	NA	NA	intronic	SLCO3A1
21	14984400	NA	NA	NA	2.09878e-08	NA	7.23366e-07	NA	NA	NA	NA	NA	NA	NA	NA	NA	intronic	SLCO3A1
21	14984957	NA	NA	NA	1.35907e-07	NA	NA	NA	NA	NA	NA	NA	NA	NA	NA	NA	intronic	SLCO3A1
21	14985180	NA	NA	NA	1.18801e-08	NA	6.20957e-07	NA	NA	NA	NA	NA	NA	NA	NA	NA	intronic	SLCO3A1
21	14985341	NA	NA	NA	6.6387e-07	NA	NA	NA	NA	NA	NA	NA	NA	NA	NA	NA	intronic	SLCO3A1
21	14985932	NA	NA	NA	1.47168e-07	NA	NA	NA	NA	NA	NA	NA	NA	NA	NA	NA	intronic	SLCO3A1
21	15579585	NA	NA	2.76639e-07	9.65011e-08	NA	7.7775e-07	NA	NA	NA	NA	NA	NA	NA	NA	NA	intergenic	SLCO3A1,SV2B
21	15865051	NA	NA	NA	1.97283e-07	NA	NA	NA	NA	NA	NA	NA	NA	NA	NA	NA	intronic	SV2B
21	17135880	NA	NA	2.19687e-07	4.63762e-08	NA	3.82725e-07	NA	NA	NA	NA	NA	NA	NA	NA	NA	intronic	AGBL1
21	17135889	NA	NA	4.12907e-08	7.53829e-09	NA	7.96077e-08	NA	NA	NA	NA	NA	NA	NA	NA	NA	intronic	AGBL1
21	17522654	NA	1.24244e-07	4.1308e-08	7.03042e-07	NA	6.53955e-07	NA	NA	NA	NA	NA	NA	NA	NA	NA	intronic	AGBL1
21	18138673	NA	NA	NA	NA	9.06186e-07	NA	NA	NA	NA	NA	NA	NA	NA	NA	NA	intergenic	AGBL1,NTRK3
21	20357110	NA	5.81399e-07	NA	NA	NA	NA	NA	NA	NA	NA	NA	NA	NA	NA	NA	intergenic	LOC101906604,ACAN
21	20755079	NA	NA	NA	2.89184e-07	NA	NA	NA	NA	NA	NA	NA	NA	NA	NA	NA	intronic	FANCI
21	20787647	NA	NA	NA	9.92017e-07	NA	NA	NA	NA	NA	NA	NA	NA	NA	NA	NA	intronic	POLG
21	20787648	NA	NA	NA	9.92017e-07	NA	NA	NA	NA	NA	NA	NA	NA	NA	NA	NA	intronic	POLG
21	24013719	NA	NA	NA	4.63982e-07	NA	NA	NA	NA	NA	NA	NA	NA	NA	NA	NA	intronic	EFL1
21	24015210	NA	7.37307e-07	NA	1.981e-07	NA	NA	NA	NA	NA	NA	NA	NA	NA	NA	NA	intronic	EFL1
21	24579585	9.98201e-07	NA	NA	NA	NA	NA	NA	NA	NA	NA	NA	NA	NA	NA	NA	intronic	SH3GL3
21	32116193	NA	NA	NA	2.72433e-07	NA	NA	NA	NA	NA	NA	NA	NA	NA	NA	NA	UTR5	PSTPIP1
21	37084329	NA	NA	NA	9.62695e-08	NA	9.68836e-07	NA	NA	NA	NA	NA	NA	NA	NA	NA	intergenic	NOVA1,LOC785745
21	39392525	NA	6.92216e-08	1.54462e-07	2.1623e-09	NA	2.07949e-08	NA	NA	NA	NA	NA	NA	NA	NA	NA	intergenic	LOC101905308,PRKD1
21	39411267	NA	NA	NA	2.8957e-07	NA	NA	NA	NA	NA	NA	NA	NA	NA	NA	NA	intergenic	LOC101905308,PRKD1
21	39436103	NA	NA	NA	3.35433e-07	NA	NA	NA	NA	NA	NA	NA	NA	NA	NA	NA	intergenic	LOC101905308,PRKD1
21	39491897	NA	NA	NA	1.7988e-07	NA	NA	NA	NA	NA	NA	NA	NA	NA	NA	NA	intergenic	LOC101905308,PRKD1
21	39626257	NA	NA	NA	NA	NA	NA	NA	NA	4.55188e-07	NA	NA	NA	NA	NA	NA	intergenic	LOC101905308,PRKD1
21	40378012	NA	NA	NA	NA	NA	NA	NA	3.85082e-07	8.24769e-07	NA	NA	NA	NA	NA	2.17624e-07	intronic	PRKD1
21	55275420	NA	NA	NA	NA	5.40257e-07	NA	NA	NA	NA	NA	NA	NA	NA	NA	NA	UTR3	MAP1A
21	56956678	NA	NA	3.14135e-07	NA	NA	NA	NA	NA	NA	NA	NA	NA	NA	NA	NA	intergenic	CPSF2,SLC24A4
21	57865295	NA	3.98569e-07	NA	NA	NA	NA	NA	NA	NA	NA	NA	NA	NA	NA	NA	intronic	BTBD7
22	1713667	NA	NA	NA	NA	9.77502e-07	NA	NA	NA	NA	NA	4.08169e-07	NA	NA	NA	NA	intronic	NEK10
22	4247838	NA	NA	NA	NA	NA	NA	NA	NA	5.02476e-07	NA	NA	NA	NA	NA	NA	intronic	RBMS3
22	4327355	NA	NA	NA	NA	NA	NA	NA	NA	6.43138e-07	NA	NA	NA	NA	NA	NA	intronic	RBMS3
22	4372880	NA	NA	NA	NA	NA	NA	NA	NA	1.63234e-07	NA	NA	NA	NA	NA	NA	intronic	RBMS3
22	4471435	NA	NA	NA	NA	NA	NA	NA	NA	1.94476e-07	NA	NA	NA	NA	NA	NA	intronic	RBMS3
22	5882262	NA	NA	NA	NA	NA	NA	NA	NA	5.04636e-07	NA	NA	NA	NA	NA	NA	intergenic	GADL1,STT3B
22	14194760	3.63133e-07	NA	NA	NA	NA	NA	NA	NA	NA	NA	NA	NA	NA	NA	NA	intronic	ULK4
22	14194776	5.7617e-08	NA	NA	NA	NA	NA	NA	NA	NA	NA	NA	NA	NA	NA	NA	intronic	ULK4
22	14194795	8.99465e-08	NA	NA	NA	NA	NA	NA	NA	NA	NA	NA	NA	NA	NA	NA	intronic	ULK4
22	18704315	NA	NA	NA	NA	NA	NA	NA	NA	NA	NA	NA	9.12965e-07	NA	NA	NA	intronic	GRM7
22	23233050	NA	NA	NA	NA	NA	NA	NA	NA	NA	NA	NA	NA	NA	7.95054e-07	NA	intronic	IL5RA
22	26381931	6.38489e-07	NA	NA	NA	NA	NA	NA	NA	NA	NA	NA	NA	NA	NA	NA	intergenic	CHL1,CNTN3
22	27562072	NA	3.44617e-07	NA	NA	NA	NA	NA	NA	NA	NA	NA	NA	NA	NA	NA	intergenic	CNTN3,PDZRN3
22	27879045	NA	NA	NA	NA	NA	NA	NA	NA	NA	NA	NA	NA	NA	7.67855e-07	NA	intergenic	CNTN3,PDZRN3
22	29004149	NA	NA	NA	NA	NA	NA	NA	NA	NA	NA	NA	NA	NA	4.48745e-07	NA	intergenic	SHQ1,RYBP
22	29049208	NA	NA	NA	NA	NA	NA	NA	NA	NA	NA	NA	NA	NA	3.01058e-07	NA	intergenic	SHQ1,RYBP
22	29085606	NA	NA	NA	NA	NA	NA	NA	NA	NA	NA	NA	NA	NA	1.90812e-07	NA	intergenic	SHQ1,RYBP
22	29166911	NA	NA	NA	NA	NA	NA	NA	NA	NA	NA	NA	NA	NA	1.08158e-07	NA	intergenic	SHQ1,RYBP
22	29180350	NA	NA	NA	NA	NA	NA	NA	NA	NA	NA	NA	NA	NA	3.20282e-07	NA	intergenic	SHQ1,RYBP
22	29231035	NA	NA	NA	NA	NA	NA	NA	NA	NA	NA	NA	NA	NA	3.21851e-07	NA	intronic	RYBP
22	29741302	NA	NA	NA	NA	NA	NA	NA	NA	NA	NA	NA	NA	NA	2.64957e-09	NA	intergenic	RYBP,TRNAC-GCA
22	29764859	NA	NA	NA	NA	NA	NA	NA	NA	NA	NA	NA	NA	NA	9.61211e-07	NA	intergenic	RYBP,TRNAC-GCA
22	31299720	NA	NA	NA	NA	NA	NA	NA	NA	NA	NA	NA	NA	NA	4.67637e-07	NA	intergenic	FOXP1,MDFIC2
22	31304707	NA	NA	NA	NA	NA	NA	NA	NA	NA	NA	NA	NA	NA	8.63315e-07	NA	intergenic	FOXP1,MDFIC2
22	32538891	NA	NA	NA	NA	NA	NA	NA	NA	NA	NA	NA	NA	NA	8.94631e-07	NA	intronic	EOGT
22	32606923	NA	NA	NA	NA	NA	NA	NA	NA	NA	NA	NA	NA	NA	6.61116e-07	NA	intronic	FAM19A4
22	32961470	NA	NA	NA	NA	NA	NA	NA	NA	NA	NA	NA	NA	NA	1.21698e-07	NA	intergenic	FAM19A4,FAM19A1
22	32961479	NA	NA	NA	NA	NA	NA	NA	NA	NA	NA	NA	NA	NA	1.21698e-07	NA	intergenic	FAM19A4,FAM19A1
22	33692409	NA	NA	NA	NA	NA	NA	NA	NA	NA	NA	5.39537e-07	NA	NA	NA	NA	intergenic	FAM19A1,SUCLG2
22	34591239	5.23642e-07	NA	NA	NA	NA	NA	NA	NA	NA	NA	NA	NA	NA	NA	NA	intergenic	KBTBD8,LRIG1
22	35832273	NA	NA	NA	NA	NA	NA	NA	NA	NA	NA	NA	8.71857e-07	NA	NA	NA	intronic	MAGI1
22	37699352	7.03469e-07	NA	NA	NA	NA	NA	NA	NA	NA	NA	NA	NA	NA	NA	NA	intronic	C22H3orf49
22	37699476	3.97763e-08	NA	NA	NA	NA	NA	NA	NA	NA	NA	NA	NA	NA	NA	NA	intronic	C22H3orf49
22	37699638	8.9526e-08	NA	NA	NA	NA	NA	NA	NA	NA	NA	NA	NA	NA	NA	NA	intronic	C22H3orf49
22	37703028	7.35079e-07	NA	NA	NA	NA	NA	NA	NA	NA	NA	NA	NA	NA	NA	NA	intronic	C22H3orf49
22	37813903	NA	NA	NA	NA	NA	NA	NA	NA	NA	NA	NA	3.74631e-07	NA	NA	NA	intronic	SYNPR
22	37865556	NA	NA	NA	NA	4.50025e-07	NA	NA	NA	NA	NA	NA	NA	NA	NA	NA	intronic	SYNPR
22	38274585	NA	NA	NA	NA	NA	NA	NA	NA	NA	NA	NA	NA	NA	1.48606e-07	NA	intergenic	SYNPR,CADPS
22	38485906	NA	NA	NA	NA	NA	NA	NA	NA	NA	6.02226e-07	2.57184e-07	1.72112e-07	NA	NA	NA	intronic	CADPS
22	38486012	NA	NA	NA	NA	NA	NA	NA	NA	NA	NA	NA	3.80869e-07	NA	NA	NA	intronic	CADPS
22	38499373	NA	NA	NA	9.37879e-07	NA	NA	NA	NA	NA	3.03797e-07	NA	NA	NA	NA	3.87717e-07	intronic	CADPS
22	38515853	NA	NA	NA	2.25241e-07	5.17429e-07	NA	NA	NA	NA	1.5281e-07	3.86861e-07	NA	NA	NA	9.53596e-07	intronic	CADPS
22	40192319	NA	NA	NA	NA	NA	NA	NA	NA	NA	NA	7.44295e-07	NA	NA	NA	NA	intronic	FHIT
22	40244208	NA	NA	NA	NA	NA	NA	NA	NA	NA	2.43369e-07	1.31534e-07	NA	NA	NA	NA	intronic	FHIT
22	40244212	NA	NA	NA	NA	NA	NA	NA	NA	NA	2.43369e-07	1.31534e-07	NA	NA	NA	NA	intronic	FHIT
22	40929409	NA	NA	NA	5.57385e-07	NA	NA	NA	NA	NA	NA	NA	NA	NA	NA	NA	intronic	FHIT
22	40929419	NA	NA	NA	7.82757e-08	NA	NA	NA	NA	NA	NA	NA	NA	NA	NA	NA	intronic	FHIT
22	41171654	NA	NA	NA	NA	NA	NA	NA	NA	NA	6.36359e-07	3.62167e-07	NA	NA	NA	NA	intronic	FHIT
22	41281287	NA	NA	NA	5.3943e-07	NA	NA	NA	NA	NA	NA	NA	NA	NA	NA	NA	intronic	FHIT
22	41848199	NA	NA	NA	NA	NA	NA	NA	NA	NA	NA	NA	NA	NA	5.23961e-07	NA	intergenic	FHIT,C22H3orf67
22	42073327	NA	NA	NA	7.63915e-07	NA	NA	NA	NA	NA	NA	NA	NA	NA	NA	NA	intergenic	FHIT,C22H3orf67
22	42080788	NA	NA	NA	NA	NA	NA	NA	NA	NA	2.81672e-07	1.21409e-07	NA	NA	NA	NA	intergenic	FHIT,C22H3orf67
22	42080789	NA	NA	NA	NA	NA	NA	NA	NA	NA	2.81672e-07	1.21409e-07	NA	NA	NA	NA	intergenic	FHIT,C22H3orf67
22	42083555	NA	NA	NA	NA	NA	NA	NA	NA	NA	NA	6.30438e-07	NA	NA	NA	NA	intergenic	FHIT,C22H3orf67
22	42091604	NA	NA	NA	5.50626e-07	3.2754e-07	NA	NA	NA	NA	8.58198e-07	4.334e-07	NA	NA	NA	NA	intergenic	FHIT,C22H3orf67
22	42152497	NA	2.18979e-08	4.12838e-07	3.14519e-08	2.53639e-07	3.15453e-08	NA	NA	NA	NA	NA	NA	NA	NA	NA	intergenic	FHIT,C22H3orf67
22	42153807	NA	NA	NA	6.24302e-07	NA	NA	NA	NA	NA	NA	NA	NA	NA	NA	NA	intergenic	FHIT,C22H3orf67
22	42182039	NA	NA	NA	4.16173e-08	1.38315e-08	1.3703e-07	NA	NA	NA	2.265e-09	1.10262e-09	NA	NA	NA	4.22572e-08	intergenic	FHIT,C22H3orf67
22	42186143	NA	NA	NA	NA	NA	NA	NA	NA	NA	NA	7.49148e-07	NA	NA	NA	NA	intergenic	FHIT,C22H3orf67
22	42187402	NA	NA	NA	NA	NA	NA	NA	NA	NA	NA	9.1728e-07	NA	NA	NA	NA	intergenic	FHIT,C22H3orf67
22	42187944	NA	NA	NA	NA	3.01047e-07	NA	NA	NA	NA	NA	9.5937e-07	NA	NA	NA	NA	intergenic	FHIT,C22H3orf67
22	42190505	NA	NA	NA	NA	5.68379e-07	NA	NA	NA	NA	7.01966e-07	1.17635e-07	NA	NA	NA	NA	intergenic	FHIT,C22H3orf67
22	42190714	NA	NA	NA	5.52686e-07	1.5495e-08	NA	NA	NA	NA	5.89883e-08	6.03398e-09	NA	NA	NA	7.94131e-07	intergenic	FHIT,C22H3orf67
22	42190936	NA	NA	NA	NA	8.86063e-07	NA	NA	NA	NA	5.57448e-07	2.86453e-07	NA	NA	NA	NA	intergenic	FHIT,C22H3orf67
22	42190945	NA	NA	NA	NA	8.86063e-07	NA	NA	NA	NA	5.57448e-07	2.86453e-07	NA	NA	NA	NA	intergenic	FHIT,C22H3orf67
22	42234384	NA	NA	NA	NA	NA	NA	NA	NA	NA	NA	5.60125e-07	NA	NA	NA	NA	intergenic	FHIT,C22H3orf67
22	42234538	NA	NA	NA	NA	NA	NA	NA	NA	NA	NA	1.76384e-07	NA	NA	NA	NA	intergenic	FHIT,C22H3orf67
22	42240244	NA	NA	NA	5.21123e-07	3.97488e-07	NA	NA	NA	NA	NA	5.13465e-07	NA	NA	NA	NA	intergenic	FHIT,C22H3orf67
22	42243712	NA	NA	NA	NA	7.28265e-07	NA	NA	NA	NA	NA	1.37698e-07	NA	NA	NA	NA	intergenic	FHIT,C22H3orf67
22	42287644	NA	NA	NA	NA	3.84969e-07	NA	NA	NA	NA	6.60038e-07	7.13738e-07	NA	NA	NA	NA	intergenic	FHIT,C22H3orf67
22	42294884	NA	NA	NA	NA	2.89292e-07	NA	NA	NA	NA	8.4101e-08	5.0585e-08	NA	NA	NA	5.06425e-07	intergenic	FHIT,C22H3orf67
22	42313804	NA	NA	NA	NA	NA	NA	NA	NA	NA	2.49253e-07	1.14388e-07	NA	NA	NA	8.64486e-07	intergenic	FHIT,C22H3orf67
22	42324704	NA	NA	NA	NA	NA	NA	NA	NA	NA	4.10386e-07	1.74876e-07	NA	NA	NA	NA	intergenic	FHIT,C22H3orf67
22	42377682	NA	NA	NA	NA	NA	NA	NA	NA	NA	8.99294e-07	6.86704e-07	NA	NA	NA	NA	intronic	C22H3orf67
22	42387949	NA	NA	NA	NA	6.21258e-08	NA	NA	NA	NA	2.1181e-07	4.41641e-08	NA	NA	NA	NA	intronic	C22H3orf67
22	42577110	NA	NA	NA	6.71986e-07	NA	NA	NA	NA	NA	NA	NA	NA	NA	NA	NA	intronic	C22H3orf67
22	42611860	NA	NA	NA	NA	NA	NA	NA	NA	NA	4.35417e-07	5.63284e-07	NA	NA	NA	NA	intronic	C22H3orf67
22	42631044	NA	NA	NA	2.05966e-07	5.0462e-09	3.60812e-07	NA	NA	NA	1.64251e-10	2.21499e-10	NA	NA	NA	4.57373e-08	intergenic	C22H3orf67,FAM3D
22	42631059	NA	NA	NA	NA	2.9726e-07	NA	NA	NA	NA	4.19519e-08	4.7049e-08	NA	NA	NA	NA	intergenic	C22H3orf67,FAM3D
22	42650930	NA	NA	NA	NA	NA	NA	NA	NA	NA	NA	2.6844e-07	NA	NA	NA	NA	intergenic	C22H3orf67,FAM3D
22	42656355	NA	NA	NA	6.43507e-07	NA	NA	NA	NA	NA	NA	NA	NA	NA	NA	NA	intergenic	C22H3orf67,FAM3D
22	42656387	NA	NA	NA	5.55895e-07	NA	NA	NA	NA	NA	NA	NA	NA	NA	NA	NA	intergenic	C22H3orf67,FAM3D
22	42692014	NA	NA	NA	NA	NA	NA	NA	NA	NA	NA	5.03658e-07	NA	NA	NA	NA	intronic	FAM3D
22	43030012	NA	NA	NA	5.67635e-07	5.71965e-07	NA	NA	NA	NA	4.33793e-08	5.19173e-08	NA	NA	NA	1.73179e-07	intronic	ABHD6
22	53609591	NA	NA	NA	NA	NA	NA	NA	NA	NA	NA	6.50244e-07	NA	NA	NA	NA	intronic	SACM1L
22	57581966	NA	NA	NA	NA	NA	NA	NA	NA	NA	NA	NA	NA	NA	3.13431e-07	NA	intronic	C22H3orf20
22	58469144	NA	NA	NA	NA	NA	NA	NA	NA	NA	NA	NA	NA	NA	7.82076e-07	NA	intergenic	HDAC11,NUP210
22	59710780	7.72315e-07	NA	NA	NA	NA	NA	NA	NA	NA	NA	NA	NA	NA	NA	NA	intergenic	KBTBD12,MGLL
23	3435124	NA	8.4704e-08	NA	8.86665e-07	NA	4.85263e-07	NA	NA	1.72751e-07	2.6432e-07	1.58658e-08	NA	NA	NA	5.10684e-08	intronic	DST
23	3479229	NA	NA	NA	NA	NA	NA	NA	NA	NA	6.83003e-08	7.76205e-10	6.99627e-07	NA	NA	5.4214e-07	intronic	DST
23	3479319	NA	NA	NA	NA	NA	NA	NA	NA	NA	3.91193e-07	2.44431e-09	NA	NA	NA	NA	intronic	DST
23	3488267	NA	NA	NA	NA	NA	NA	NA	NA	NA	NA	2.5528e-07	NA	NA	NA	NA	intronic	DST
23	3561710	NA	6.70838e-07	NA	NA	NA	NA	NA	NA	NA	NA	NA	NA	NA	NA	NA	intronic	DST
23	4502268	NA	NA	NA	NA	NA	NA	NA	NA	NA	NA	3.5115e-07	NA	NA	NA	NA	intronic	BMP5
23	5374890	NA	4.85823e-08	NA	NA	4.31298e-07	1.65423e-07	NA	NA	NA	NA	NA	NA	NA	NA	NA	intergenic	TRNAG-CCC,FAM83B
23	5382977	NA	NA	NA	NA	7.95847e-07	NA	NA	NA	NA	NA	NA	NA	NA	NA	NA	intergenic	TRNAG-CCC,FAM83B
23	5429220	NA	7.6915e-07	NA	NA	NA	NA	NA	NA	NA	NA	NA	NA	NA	NA	NA	intergenic	TRNAG-CCC,FAM83B
23	6785080	NA	NA	NA	NA	NA	NA	NA	NA	NA	NA	5.86076e-07	NA	NA	NA	NA	intergenic	LOC112443853,KLHL31
23	6790981	NA	NA	NA	NA	NA	NA	NA	NA	NA	3.35058e-07	6.44027e-08	NA	NA	NA	NA	intergenic	LOC112443853,KLHL31
23	7043693	NA	NA	NA	NA	NA	NA	NA	NA	NA	NA	6.18934e-07	NA	NA	NA	NA	intronic	DSB
23	7150942	NA	NA	NA	2.94853e-07	1.16285e-08	4.15649e-07	NA	NA	NA	6.66678e-09	1.23987e-09	NA	NA	NA	3.90298e-08	intergenic	TAP2,LOC618733
23	7155313	NA	NA	NA	NA	NA	NA	NA	NA	NA	NA	4.04516e-07	NA	NA	NA	NA	intergenic	TAP2,LOC618733
23	7189450	NA	NA	NA	NA	NA	NA	NA	NA	NA	NA	4.91708e-07	NA	NA	NA	NA	intronic	PSMB9
23	7206180	NA	NA	NA	NA	NA	NA	NA	NA	NA	5.01554e-07	1.49328e-07	NA	NA	NA	NA	intergenic	PSMB9,H2B
23	7206284	NA	NA	NA	NA	NA	NA	NA	NA	NA	9.76119e-07	2.81343e-07	NA	NA	NA	NA	intergenic	PSMB9,H2B
23	11404457	NA	NA	NA	NA	NA	NA	NA	NA	NA	NA	NA	NA	NA	3.8648e-07	NA	intergenic	CCDC167,MDGA1
23	13802130	NA	NA	NA	NA	5.71916e-07	NA	NA	NA	NA	3.01425e-07	9.35469e-07	NA	NA	NA	NA	intronic	DAAM2
23	15435164	NA	NA	NA	NA	NA	NA	NA	NA	6.02918e-07	NA	NA	NA	NA	NA	NA	intergenic	FOXP4,MDFI
23	28190155	NA	NA	NA	3.69265e-07	NA	NA	NA	NA	NA	NA	NA	NA	NA	NA	NA	intergenic	DDR1,IER3
23	28914938	NA	NA	NA	4.9282e-07	2.98883e-07	NA	NA	NA	NA	4.62256e-07	1.17923e-07	NA	NA	NA	NA	intergenic	PPP1R11,ZNRD1
23	28914944	NA	NA	NA	NA	6.42904e-07	NA	NA	NA	NA	2.0113e-07	1.23236e-07	NA	NA	NA	NA	intergenic	PPP1R11,ZNRD1
23	28914975	NA	NA	NA	NA	NA	NA	NA	NA	NA	9.76887e-07	7.47931e-07	NA	NA	NA	NA	intergenic	PPP1R11,ZNRD1
23	28915017	NA	NA	NA	NA	NA	NA	NA	NA	NA	2.42012e-07	1.63329e-07	NA	NA	NA	NA	intergenic	PPP1R11,ZNRD1
23	28915018	NA	NA	NA	NA	NA	NA	NA	NA	NA	2.42012e-07	1.63329e-07	NA	NA	NA	NA	intergenic	PPP1R11,ZNRD1
23	28915272	NA	NA	NA	6.91112e-08	3.96191e-07	5.51002e-07	NA	NA	NA	NA	3.69625e-07	NA	NA	NA	NA	intergenic	PPP1R11,ZNRD1
23	28915304	NA	NA	NA	5.68328e-07	NA	NA	NA	NA	NA	NA	NA	NA	NA	NA	NA	intergenic	PPP1R11,ZNRD1
23	28915341	NA	4.44488e-07	2.13417e-07	8.59948e-10	6.76882e-10	1.00329e-09	NA	NA	NA	2.87545e-09	1.05206e-09	NA	NA	NA	1.74395e-08	intergenic	PPP1R11,ZNRD1
23	28915388	NA	NA	NA	6.12927e-08	4.5415e-08	2.4367e-07	NA	NA	NA	9.06306e-07	1.20628e-07	NA	NA	NA	NA	intergenic	PPP1R11,ZNRD1
23	28916062	NA	NA	NA	4.14375e-07	NA	7.22472e-07	NA	NA	NA	1.77534e-07	9.56585e-08	NA	NA	NA	NA	downstream	ZNRD1
23	28916204	NA	NA	NA	NA	NA	NA	NA	NA	NA	NA	5.66622e-07	NA	NA	NA	NA	downstream	ZNRD1
23	34070733	NA	NA	NA	NA	NA	NA	NA	NA	8.20755e-07	NA	8.19746e-07	NA	NA	NA	NA	intergenic	NRSN1,LOC788801
23	34070754	NA	NA	NA	NA	NA	NA	NA	NA	3.40696e-07	8.44831e-07	4.16645e-07	NA	NA	NA	NA	intergenic	NRSN1,LOC788801
23	34464555	NA	NA	NA	NA	NA	NA	NA	NA	1.95628e-07	1.25446e-07	6.70945e-07	NA	NA	NA	3.96417e-07	intergenic	LOC788801,PRP4
23	34590619	NA	NA	NA	NA	NA	NA	NA	NA	NA	7.13305e-07	7.17936e-07	NA	NA	NA	NA	intergenic	LOC788801,PRP4
23	47743196	NA	NA	NA	NA	NA	NA	NA	NA	NA	NA	NA	NA	7.38393e-09	NA	NA	intergenic	BMP6,SNRNP48
23	47753520	NA	NA	NA	NA	NA	NA	NA	NA	NA	NA	NA	NA	3.68933e-08	NA	NA	intergenic	BMP6,SNRNP48
23	47767924	NA	NA	NA	NA	NA	NA	NA	NA	NA	NA	NA	NA	6.08764e-07	NA	NA	intergenic	BMP6,SNRNP48
23	47767968	NA	NA	NA	NA	NA	NA	NA	NA	NA	NA	NA	NA	3.84144e-07	NA	NA	intergenic	BMP6,SNRNP48
23	47768090	NA	NA	NA	NA	NA	NA	NA	NA	NA	NA	NA	NA	3.89824e-07	NA	NA	intergenic	BMP6,SNRNP48
23	47768103	NA	NA	NA	NA	NA	NA	NA	NA	NA	NA	NA	NA	8.18432e-07	NA	NA	intergenic	BMP6,SNRNP48
23	47884047	NA	NA	NA	NA	NA	NA	NA	NA	NA	NA	NA	NA	4.46308e-07	NA	NA	intergenic	DSP,RIOK1
23	48074850	NA	NA	NA	NA	NA	NA	NA	NA	NA	NA	NA	NA	9.32542e-09	NA	NA	intronic	RREB1
23	48082958	NA	NA	NA	NA	NA	NA	NA	NA	NA	NA	NA	NA	2.27892e-08	NA	NA	intronic	RREB1
23	48085231	NA	NA	NA	NA	NA	NA	NA	NA	NA	NA	NA	NA	6.71905e-07	NA	NA	intronic	RREB1
23	48292248	NA	NA	NA	NA	NA	NA	NA	NA	NA	NA	NA	NA	NA	6.71267e-07	NA	intergenic	RREB1,LY86
23	49527722	4.10352e-08	NA	NA	NA	NA	NA	NA	NA	NA	NA	NA	NA	NA	NA	NA	intergenic	PPP1R3G,RPP40
23	49527729	4.10352e-08	NA	NA	NA	NA	NA	NA	NA	NA	NA	NA	NA	NA	NA	NA	intergenic	PPP1R3G,RPP40
24	614840	NA	NA	5.15486e-07	NA	NA	NA	NA	NA	NA	NA	NA	NA	NA	NA	NA	exonic	KCNG2
24	635007	NA	NA	1.17072e-07	NA	NA	NA	NA	NA	NA	NA	NA	NA	NA	NA	NA	intronic	KCNG2
24	640297	NA	NA	3.68586e-07	NA	NA	NA	NA	NA	NA	NA	NA	NA	NA	NA	NA	intergenic	KCNG2,CTDP1
24	646054	NA	7.71274e-10	1.9845e-11	1.16555e-09	2.39803e-07	1.12597e-09	NA	NA	NA	NA	NA	NA	NA	NA	NA	intergenic	KCNG2,CTDP1
24	650720	NA	NA	7.08348e-07	NA	NA	NA	NA	NA	NA	NA	NA	NA	NA	NA	NA	intergenic	KCNG2,CTDP1
24	651542	NA	9.17931e-07	5.57758e-08	8.65548e-07	NA	8.95105e-07	NA	NA	NA	NA	NA	NA	NA	NA	NA	intergenic	KCNG2,CTDP1
24	652415	NA	3.0021e-07	8.96325e-09	NA	NA	NA	NA	NA	NA	NA	NA	NA	NA	NA	NA	intergenic	KCNG2,CTDP1
24	655776	NA	4.74828e-07	9.32795e-09	NA	NA	NA	NA	NA	NA	NA	NA	NA	NA	NA	NA	intergenic	KCNG2,CTDP1
24	666311	NA	NA	5.16531e-08	NA	NA	NA	NA	NA	NA	NA	NA	NA	NA	NA	NA	intergenic	KCNG2,CTDP1
24	666339	NA	NA	2.62371e-07	NA	NA	NA	NA	NA	NA	NA	NA	NA	NA	NA	NA	intergenic	KCNG2,CTDP1
24	753567	NA	1.94836e-07	2.74713e-08	6.18964e-07	NA	2.95086e-07	NA	NA	NA	NA	NA	NA	NA	NA	NA	intergenic	LOC101902808,NFATC1
24	767397	NA	NA	5.52328e-07	NA	NA	NA	NA	NA	NA	NA	NA	NA	NA	NA	NA	intergenic	LOC101902808,NFATC1
24	769952	NA	NA	9.70068e-08	NA	NA	NA	NA	NA	NA	NA	NA	NA	NA	NA	NA	intergenic	LOC101902808,NFATC1
24	945386	NA	NA	NA	4.46236e-07	NA	7.90477e-07	NA	NA	NA	NA	NA	NA	NA	NA	NA	intronic	ATP9B
24	949649	NA	3.01328e-07	4.4857e-08	3.09113e-09	1.4568e-08	4.84059e-09	NA	NA	NA	NA	9.49987e-07	NA	NA	NA	NA	intronic	ATP9B
24	960786	NA	NA	2.73104e-07	1.33094e-08	5.2752e-07	4.4112e-08	NA	NA	NA	NA	NA	NA	NA	NA	NA	intronic	ATP9B
24	960794	NA	NA	1.35193e-07	6.6704e-09	3.19513e-07	2.35596e-08	NA	NA	NA	NA	NA	NA	NA	NA	NA	intronic	ATP9B
24	963356	NA	1.75196e-08	6.03687e-10	4.21259e-08	NA	3.40548e-08	NA	NA	NA	NA	NA	NA	NA	NA	NA	intronic	ATP9B
24	963622	NA	2.3462e-10	6.24778e-11	1.32043e-09	1.45071e-07	4.18817e-10	NA	NA	NA	NA	NA	NA	NA	NA	NA	intronic	ATP9B
24	964061	NA	NA	7.96331e-07	1.03109e-07	1.93996e-08	5.6255e-08	NA	NA	NA	NA	NA	NA	NA	NA	NA	intronic	ATP9B
24	964178	NA	NA	NA	NA	NA	8.79979e-07	NA	NA	NA	NA	NA	NA	NA	NA	NA	intronic	ATP9B
24	964270	NA	NA	NA	9.02492e-07	4.6228e-07	7.33422e-07	NA	NA	NA	NA	NA	NA	NA	NA	NA	intronic	ATP9B
24	969385	NA	NA	2.00305e-07	NA	NA	NA	NA	NA	NA	NA	NA	NA	NA	NA	NA	intronic	ATP9B
24	974089	NA	NA	7.87633e-07	NA	NA	NA	NA	NA	NA	NA	NA	NA	NA	NA	NA	intronic	ATP9B
24	991473	NA	NA	1.77554e-07	3.59654e-08	2.44685e-07	5.53126e-08	NA	NA	NA	NA	NA	NA	NA	NA	NA	intronic	ATP9B
24	991618	NA	NA	2.1187e-07	NA	NA	NA	NA	NA	NA	NA	NA	NA	NA	NA	NA	intronic	ATP9B
24	991619	NA	NA	2.1187e-07	NA	NA	NA	NA	NA	NA	NA	NA	NA	NA	NA	NA	intronic	ATP9B
24	996294	NA	NA	8.56277e-07	1.75467e-07	NA	3.03389e-07	NA	NA	NA	NA	NA	NA	NA	NA	NA	intronic	ATP9B
24	996336	NA	NA	8.68038e-07	7.03088e-08	2.87221e-07	1.1752e-07	NA	NA	NA	NA	NA	NA	NA	NA	NA	intronic	ATP9B
24	996337	NA	NA	8.68038e-07	7.03088e-08	2.87221e-07	1.1752e-07	NA	NA	NA	NA	NA	NA	NA	NA	NA	intronic	ATP9B
24	998163	NA	8.59503e-07	1.68767e-07	2.90068e-09	3.80664e-08	9.62014e-09	NA	NA	NA	NA	NA	NA	NA	NA	NA	intronic	ATP9B
24	998346	NA	4.59803e-07	8.16557e-08	1.198e-09	1.70678e-08	4.17237e-09	NA	NA	NA	NA	NA	NA	NA	NA	NA	intronic	ATP9B
24	1001337	NA	3.99879e-07	NA	NA	NA	NA	NA	NA	NA	NA	NA	NA	NA	NA	NA	intronic	ATP9B
24	1003157	NA	NA	3.25213e-07	NA	NA	NA	NA	NA	NA	NA	NA	NA	NA	NA	NA	intronic	ATP9B
24	1005575	NA	5.21611e-07	6.35926e-08	2.47795e-08	NA	1.58879e-07	NA	NA	NA	NA	NA	NA	NA	NA	NA	intronic	ATP9B
24	1008438	NA	7.78068e-07	2.61069e-07	NA	NA	NA	NA	NA	NA	NA	NA	NA	NA	NA	NA	intronic	ATP9B
24	1040883	NA	2.22538e-08	1.70145e-07	2.18117e-07	NA	1.02035e-07	NA	NA	NA	NA	NA	NA	NA	NA	NA	intergenic	ATP9B,SALL3
24	1040889	NA	2.22538e-08	1.70145e-07	2.18117e-07	NA	1.02035e-07	NA	NA	NA	NA	NA	NA	NA	NA	NA	intergenic	ATP9B,SALL3
24	1040968	NA	9.29791e-07	NA	NA	NA	NA	NA	NA	NA	NA	NA	NA	NA	NA	NA	intergenic	ATP9B,SALL3
24	1519586	NA	NA	NA	NA	NA	NA	NA	NA	NA	NA	NA	NA	NA	5.12655e-09	NA	intergenic	SALL3,TRNAK-UUU
24	1561163	1.99094e-07	NA	NA	NA	NA	NA	NA	NA	NA	NA	NA	NA	NA	NA	NA	intergenic	SALL3,TRNAK-UUU
24	1769982	NA	NA	NA	NA	NA	NA	NA	NA	NA	NA	NA	NA	NA	7.63546e-08	NA	intergenic	SALL3,TRNAK-UUU
24	1817388	NA	9.25044e-07	NA	NA	NA	NA	NA	NA	NA	NA	NA	NA	NA	NA	NA	intergenic	TRNAK-UUU,GALR1
24	1826795	NA	NA	NA	6.5279e-07	4.71996e-08	7.68353e-07	NA	NA	NA	NA	NA	NA	NA	NA	NA	intergenic	TRNAK-UUU,GALR1
24	3430374	NA	NA	NA	NA	NA	NA	NA	NA	NA	NA	NA	NA	NA	6.33904e-12	NA	intronic	TSHZ1
24	3432502	NA	NA	NA	NA	NA	NA	NA	NA	NA	NA	NA	NA	NA	3.59309e-10	NA	intronic	TSHZ1
24	3438218	NA	NA	NA	NA	NA	NA	NA	NA	NA	NA	NA	NA	NA	9.40812e-08	NA	intronic	TSHZ1
24	3443803	NA	NA	NA	NA	NA	NA	NA	NA	NA	NA	NA	NA	NA	1.66746e-07	NA	intronic	TSHZ1
24	3463336	NA	NA	NA	NA	NA	NA	NA	NA	NA	NA	NA	NA	NA	1.32541e-11	NA	intronic	TSHZ1
24	3463969	NA	NA	NA	NA	NA	NA	NA	NA	NA	NA	NA	NA	NA	5.83753e-07	NA	intronic	TSHZ1
24	3465392	NA	NA	NA	NA	NA	NA	NA	NA	NA	NA	NA	NA	NA	8.15531e-07	NA	intronic	TSHZ1
24	3477515	NA	NA	NA	NA	NA	NA	NA	NA	NA	NA	NA	NA	NA	7.60576e-09	NA	intronic	TSHZ1
24	3480645	NA	NA	NA	NA	NA	NA	NA	NA	NA	NA	NA	NA	NA	4.76967e-11	NA	intronic	TSHZ1
24	4256544	NA	NA	NA	NA	NA	NA	NA	NA	NA	NA	NA	NA	NA	3.73927e-07	NA	intronic	FBXO15
24	4256935	NA	NA	NA	NA	NA	NA	NA	NA	NA	NA	NA	NA	NA	5.71383e-07	NA	intronic	FBXO15
24	4627708	NA	NA	NA	NA	NA	NA	NA	NA	NA	NA	NA	NA	NA	9.82071e-07	NA	intergenic	FBXO15,TRNAA-CGC
24	6664783	NA	NA	NA	NA	NA	NA	NA	NA	NA	NA	NA	NA	NA	3.2459e-07	NA	intergenic	CBLN2,SOCS6
24	7777027	NA	NA	NA	NA	NA	NA	NA	NA	NA	NA	NA	NA	NA	8.7655e-08	NA	intronic	DOK6
24	7845948	NA	NA	NA	NA	NA	NA	NA	NA	NA	NA	NA	NA	NA	1.21466e-07	NA	intergenic	DOK6,CCDC102B
24	7897669	NA	NA	NA	NA	NA	NA	NA	NA	NA	NA	NA	NA	NA	5.24031e-07	NA	intergenic	DOK6,CCDC102B
24	10964071	NA	7.63001e-07	NA	NA	NA	NA	NA	NA	NA	NA	NA	NA	NA	NA	NA	intergenic	CDH7,TRNAC-GCA
24	16487991	1.85619e-07	NA	NA	NA	NA	NA	NA	NA	NA	NA	NA	NA	NA	NA	NA	intergenic	TRNAC-GCA,TRNAK-UUU
24	28044733	NA	NA	NA	NA	NA	NA	NA	NA	NA	NA	NA	NA	NA	4.29506e-07	NA	intergenic	DSC3,TRNAW-CCA
24	35949693	NA	NA	NA	6.34527e-07	3.92542e-07	4.63879e-07	NA	NA	NA	5.18616e-08	7.80201e-07	NA	NA	NA	NA	intergenic	ADCYAP1,METTL4
24	35959170	NA	5.99508e-07	NA	NA	NA	NA	NA	NA	NA	NA	NA	NA	NA	NA	NA	intergenic	ADCYAP1,METTL4
24	35992741	NA	NA	9.20064e-07	1.70081e-07	NA	6.17592e-07	NA	NA	NA	NA	NA	NA	NA	NA	NA	intergenic	ADCYAP1,METTL4
24	36209959	NA	NA	NA	NA	NA	NA	NA	NA	NA	NA	NA	NA	NA	4.14849e-07	NA	intergenic	ADCYAP1,METTL4
24	36673205	NA	7.21246e-07	NA	NA	NA	NA	NA	NA	NA	NA	NA	NA	NA	NA	NA	intergenic	ADCYAP1,METTL4
24	37791388	NA	5.42684e-07	NA	NA	NA	NA	NA	NA	NA	NA	NA	NA	NA	NA	NA	intronic	DLGAP1
24	52397938	NA	8.33495e-07	NA	NA	NA	NA	NA	NA	NA	NA	NA	NA	NA	NA	NA	intergenic	LOC112444158,DCC
24	53643562	NA	NA	NA	NA	NA	NA	NA	NA	NA	NA	NA	NA	NA	7.69143e-07	NA	intronic	MBD2
24	53967572	NA	NA	NA	NA	NA	NA	NA	NA	NA	NA	NA	NA	NA	2.98022e-07	NA	intergenic	LOC101904580,LOC100137989
24	54911703	NA	NA	NA	NA	NA	NA	NA	NA	NA	NA	NA	NA	NA	6.05066e-07	NA	intronic	TCF4
24	56133035	NA	NA	NA	6.53294e-07	NA	NA	NA	NA	NA	NA	NA	NA	NA	NA	NA	intronic	WDR7
24	56461128	NA	8.40624e-09	7.76488e-09	3.18719e-08	4.89512e-07	8.99238e-09	NA	NA	NA	NA	NA	NA	NA	NA	NA	intergenic	WDR7,ST8SIA3
24	56462511	NA	NA	9.16573e-07	NA	NA	NA	NA	NA	NA	NA	NA	NA	NA	NA	NA	intergenic	WDR7,ST8SIA3
24	56501282	NA	3.66956e-07	2.59326e-07	NA	NA	NA	NA	NA	NA	NA	NA	NA	NA	NA	NA	intergenic	WDR7,ST8SIA3
24	56736422	NA	9.85672e-07	6.59252e-07	NA	NA	NA	NA	NA	NA	NA	NA	NA	NA	NA	NA	UTR3	ONECUT2
24	57097215	NA	NA	7.54249e-07	NA	NA	NA	NA	NA	NA	NA	NA	NA	NA	NA	NA	intergenic	ATP8B1,NEDD4L
24	57219749	NA	2.44999e-07	NA	NA	NA	NA	NA	NA	NA	NA	NA	NA	NA	NA	NA	intronic	NEDD4L
24	59582771	NA	3.79513e-09	8.67577e-10	4.5403e-07	NA	1.73265e-07	NA	NA	NA	NA	NA	NA	NA	NA	NA	intergenic	LOC529488,LOC112444177
24	59710707	NA	3.43018e-07	NA	NA	NA	NA	NA	NA	NA	NA	NA	NA	NA	NA	NA	intergenic	LOC529488,LOC112444177
24	59711156	NA	1.2113e-07	1.09072e-07	NA	NA	NA	NA	NA	NA	NA	NA	NA	NA	NA	NA	intergenic	LOC529488,LOC112444177
24	60019794	2.62217e-07	NA	NA	NA	NA	NA	NA	NA	NA	NA	NA	NA	NA	NA	NA	intronic	CDH20
24	61413927	NA	6.90154e-07	NA	NA	NA	NA	NA	NA	NA	NA	NA	NA	NA	NA	NA	intronic	BCL2
24	62020383	NA	2.48964e-07	1.24459e-07	NA	NA	NA	NA	NA	NA	NA	NA	NA	NA	NA	NA	UTR5	LOC522479
24	62131802	NA	NA	NA	5.00861e-07	NA	NA	NA	NA	NA	NA	NA	NA	NA	NA	NA	intergenic	SERPINB10,LOC100298064
24	62178621	NA	NA	NA	NA	NA	NA	NA	NA	NA	NA	NA	NA	NA	6.39385e-07	NA	intergenic	SERPINB10,LOC100298064
25	5635618	9.37055e-07	NA	NA	NA	NA	NA	NA	NA	NA	NA	NA	NA	NA	NA	NA	intronic	RBFOX1
25	7411644	NA	NA	NA	NA	NA	NA	NA	NA	NA	NA	NA	NA	NA	6.33804e-07	NA	intergenic	RBFOX1,TRNAD-GUC
25	9905812	NA	NA	5.6556e-07	NA	NA	NA	NA	NA	NA	NA	NA	NA	NA	NA	NA	intergenic	CLEC16A,SOCS1
25	9905814	NA	NA	5.6556e-07	NA	NA	NA	NA	NA	NA	NA	NA	NA	NA	NA	NA	intergenic	CLEC16A,SOCS1
25	9922589	NA	NA	4.97332e-07	NA	NA	NA	NA	NA	NA	NA	NA	NA	NA	NA	NA	intergenic	SOCS1,TNP2
25	12512845	NA	NA	NA	NA	NA	NA	NA	NA	NA	NA	NA	NA	NA	1.91029e-07	NA	intergenic	SHISA9,ERCC4
25	12512901	NA	NA	NA	NA	NA	NA	NA	NA	NA	NA	NA	NA	NA	2.36356e-07	NA	intergenic	SHISA9,ERCC4
25	12512903	NA	NA	NA	NA	NA	NA	NA	NA	NA	NA	NA	NA	NA	2.36356e-07	NA	intergenic	SHISA9,ERCC4
25	12512916	NA	NA	NA	NA	NA	NA	NA	NA	NA	NA	NA	NA	NA	7.28431e-08	NA	intergenic	SHISA9,ERCC4
25	12512933	NA	NA	NA	NA	NA	NA	NA	NA	NA	NA	NA	NA	NA	1.8905e-07	NA	intergenic	SHISA9,ERCC4
25	14071988	NA	NA	NA	NA	NA	NA	NA	NA	NA	NA	NA	NA	NA	5.35184e-08	NA	intronic	MARF1
25	14217931	NA	6.38747e-07	3.16605e-07	NA	NA	NA	NA	NA	NA	NA	NA	NA	NA	NA	NA	intronic	MYH11
25	15175680	NA	2.0976e-07	3.778e-07	NA	NA	NA	NA	NA	NA	NA	NA	NA	NA	NA	NA	intergenic	TRNAG-CCC,LOC100296255
25	16242465	NA	7.83694e-08	3.19685e-08	NA	NA	2.26911e-07	NA	NA	NA	NA	NA	NA	NA	NA	NA	intergenic	XYLT1,RPS15A
25	16244066	NA	6.86014e-07	NA	NA	NA	NA	NA	NA	NA	NA	NA	NA	NA	NA	NA	intergenic	XYLT1,RPS15A
25	16340736	NA	NA	NA	NA	NA	NA	NA	NA	NA	NA	9.3774e-07	6.83034e-07	NA	NA	NA	intergenic	XYLT1,RPS15A
25	16355842	NA	5.3836e-07	3.66697e-08	NA	NA	NA	NA	NA	NA	NA	NA	NA	NA	NA	NA	intergenic	XYLT1,RPS15A
25	24629926	NA	2.9043e-07	2.67167e-08	2.80118e-07	NA	4.54687e-07	NA	NA	NA	NA	NA	NA	NA	NA	NA	intergenic	HS3ST4,C25H16orf82
25	24629991	NA	2.16904e-07	8.30262e-08	NA	NA	NA	NA	NA	NA	NA	NA	NA	NA	NA	NA	intergenic	HS3ST4,C25H16orf82
25	31395441	6.11544e-07	NA	NA	NA	NA	NA	NA	NA	NA	NA	NA	NA	NA	NA	NA	intergenic	AUTS2,CASTOR2
25	31514544	5.12634e-07	NA	NA	NA	NA	NA	NA	NA	NA	NA	NA	NA	NA	NA	NA	intergenic	AUTS2,CASTOR2
26	3925826	NA	9.4496e-08	NA	NA	NA	NA	NA	NA	NA	NA	NA	NA	NA	NA	NA	intergenic	LOC104975936,PCDH15
26	8216357	NA	NA	NA	NA	NA	NA	NA	NA	NA	NA	NA	NA	1.35524e-07	NA	NA	intronic	PRKG1
26	8228651	NA	NA	NA	NA	NA	NA	NA	NA	NA	NA	NA	NA	4.01758e-07	NA	NA	intronic	PRKG1
26	8230319	NA	NA	NA	NA	NA	NA	NA	NA	NA	NA	NA	NA	4.91742e-07	NA	NA	intronic	PRKG1
26	8232646	NA	NA	NA	NA	NA	NA	NA	NA	NA	NA	NA	NA	9.75064e-07	NA	NA	intronic	PRKG1
26	10064350	NA	NA	NA	NA	NA	NA	NA	NA	NA	NA	NA	8.3029e-07	NA	NA	NA	intronic	RNLS
26	15522708	NA	7.81206e-09	1.06428e-08	2.33843e-07	NA	2.44003e-07	NA	NA	NA	NA	NA	NA	NA	NA	NA	intronic	PLCE1
26	25368227	NA	NA	NA	NA	9.00596e-07	NA	NA	NA	NA	NA	NA	NA	NA	NA	NA	intronic	SORCS3
26	25368905	NA	NA	NA	NA	4.04631e-07	NA	NA	NA	NA	8.20505e-08	NA	NA	NA	NA	NA	intronic	SORCS3
26	27046379	NA	NA	NA	NA	5.66248e-07	NA	NA	NA	NA	NA	NA	NA	NA	NA	NA	intergenic	TRNAA-AGC,SORCS1
26	34610428	NA	NA	NA	NA	NA	NA	NA	NA	NA	NA	NA	NA	NA	2.84921e-08	NA	intronic	CCDC186
26	34621811	NA	NA	NA	NA	NA	NA	NA	NA	NA	NA	NA	NA	NA	2.01531e-07	NA	intronic	CCDC186
26	34641004	NA	NA	NA	NA	NA	NA	NA	NA	NA	NA	NA	NA	NA	1.16972e-07	NA	intronic	TDRD1
26	37545901	NA	NA	NA	NA	NA	NA	NA	NA	NA	NA	NA	NA	NA	4.76752e-07	NA	intergenic	KCNK18,SLC18A2
26	39722319	9.07859e-07	NA	NA	NA	NA	NA	NA	NA	NA	NA	NA	NA	NA	NA	NA	intergenic	TIAL1,TRNAG-CCC
26	40225943	NA	NA	NA	NA	NA	NA	NA	NA	NA	NA	NA	NA	NA	1.11833e-07	NA	intergenic	SEC23IP,PLPP4
26	40341584	NA	NA	NA	NA	NA	NA	NA	NA	NA	NA	NA	NA	NA	3.88778e-07	NA	intergenic	SEC23IP,PLPP4
26	40730058	NA	NA	NA	NA	NA	NA	NA	NA	NA	NA	NA	NA	NA	9.89616e-07	NA	intergenic	PLPP4,WDR11
26	40730121	NA	NA	NA	NA	NA	NA	NA	NA	NA	NA	NA	NA	NA	2.98385e-07	NA	intergenic	PLPP4,WDR11
26	43499894	NA	NA	NA	NA	NA	NA	NA	NA	NA	NA	NA	NA	NA	9.43148e-07	NA	intronic	CPXM2
26	45440419	NA	NA	NA	NA	NA	NA	NA	NA	2.51039e-07	NA	NA	NA	NA	NA	NA	intronic	FANK1
26	45578204	NA	NA	NA	3.33197e-07	NA	NA	NA	NA	NA	NA	NA	NA	NA	NA	NA	intronic	ADAM12
26	45584518	NA	NA	NA	2.72988e-07	NA	NA	NA	NA	NA	NA	NA	NA	NA	NA	NA	intronic	ADAM12
26	45616334	NA	NA	NA	3.98284e-07	3.80908e-07	NA	NA	NA	NA	NA	NA	NA	NA	NA	NA	intronic	ADAM12
26	46043378	5.09603e-07	NA	NA	NA	NA	NA	NA	NA	NA	NA	NA	NA	NA	NA	NA	intronic	C26H10orf90
26	46747224	NA	NA	NA	NA	NA	8.8889e-07	NA	NA	NA	NA	NA	NA	NA	NA	NA	intronic	DOCK1
26	46763015	NA	1.75051e-07	1.77865e-08	1.70256e-07	1.76148e-07	5.3907e-08	NA	NA	NA	NA	NA	NA	NA	NA	1.44832e-07	intronic	DOCK1
26	46808610	NA	NA	NA	NA	NA	NA	NA	NA	NA	NA	NA	7.62966e-07	NA	NA	NA	intronic	DOCK1
26	46808615	NA	NA	NA	NA	NA	NA	NA	NA	NA	NA	NA	9.76412e-07	NA	NA	8.369e-07	intronic	DOCK1
26	46808851	NA	5.45915e-07	3.20448e-07	NA	NA	9.63788e-07	NA	NA	NA	NA	NA	NA	NA	NA	NA	intronic	DOCK1
26	46958149	NA	NA	NA	NA	8.01976e-07	NA	NA	NA	NA	NA	NA	NA	NA	NA	NA	intergenic	DOCK1,NPS
27	2003307	NA	NA	NA	NA	NA	NA	NA	NA	NA	NA	NA	NA	NA	5.26907e-07	NA	intergenic	MYOM2,CSMD1
27	2457794	NA	NA	NA	NA	NA	NA	NA	NA	NA	NA	NA	NA	2.63649e-07	NA	NA	exonic	CSMD1
27	5068939	NA	NA	3.75235e-07	NA	NA	NA	NA	NA	NA	NA	NA	NA	NA	NA	NA	intergenic	LOC782601,TRNAG-CCC
27	5823613	NA	NA	NA	NA	NA	NA	6.9408e-07	NA	NA	NA	NA	NA	NA	NA	NA	intronic	AGPAT5
27	6568391	NA	NA	NA	5.67357e-08	2.92745e-07	1.66474e-07	NA	NA	NA	2.289e-07	4.5218e-08	NA	NA	NA	5.91889e-08	intergenic	LOC107131528,LOC112444640
27	12423437	NA	NA	NA	4.81529e-07	NA	NA	NA	NA	NA	NA	NA	NA	NA	NA	NA	intergenic	TRNAW-CCA,TENM3
27	13641639	NA	NA	NA	3.15023e-07	NA	NA	NA	NA	NA	NA	NA	NA	NA	NA	NA	intronic	TENM3
27	13746618	NA	NA	NA	NA	NA	NA	NA	1.22338e-08	4.99097e-09	7.38788e-08	2.00265e-07	NA	NA	NA	2.91549e-08	intronic	TENM3
27	13746855	NA	7.30462e-07	NA	NA	NA	NA	NA	NA	NA	NA	NA	NA	NA	NA	NA	intronic	TENM3
27	13746863	NA	3.31072e-07	NA	NA	NA	NA	NA	NA	NA	NA	NA	NA	NA	NA	NA	intronic	TENM3
27	15404976	NA	2.53706e-07	1.60327e-07	6.47758e-07	NA	5.43511e-07	NA	NA	NA	NA	NA	NA	NA	NA	NA	intergenic	HELT,SLC25A4
27	15479434	NA	5.21691e-07	NA	NA	NA	NA	NA	NA	NA	NA	NA	NA	NA	NA	NA	intergenic	HELT,SLC25A4
27	16312536	NA	5.35643e-09	7.39377e-08	4.4345e-07	NA	2.00895e-07	NA	NA	NA	NA	NA	NA	NA	NA	NA	intronic	F11
27	16321262	NA	2.62414e-08	1.8918e-07	NA	NA	NA	NA	NA	NA	NA	NA	NA	NA	NA	NA	intergenic	F11,MTNR1A
27	16323990	NA	4.08273e-07	NA	NA	NA	NA	NA	NA	NA	NA	NA	NA	NA	NA	NA	intergenic	F11,MTNR1A
27	16324553	NA	4.3394e-09	2.99237e-10	3.30629e-07	NA	1.15893e-07	NA	NA	NA	NA	NA	NA	NA	NA	NA	intergenic	F11,MTNR1A
27	16669925	NA	NA	9.30302e-07	9.28622e-08	5.27248e-07	2.37336e-07	NA	NA	NA	NA	NA	NA	NA	NA	NA	intergenic	LOC112444595,ZFP42
27	16669948	NA	NA	NA	8.26408e-07	NA	NA	NA	NA	NA	NA	NA	NA	NA	NA	NA	intergenic	LOC112444595,ZFP42
27	17124774	NA	NA	6.75017e-07	NA	NA	NA	NA	NA	NA	NA	NA	NA	NA	NA	NA	intergenic	LOC112444595,ZFP42
27	17759067	2.34281e-07	NA	NA	NA	NA	NA	NA	NA	NA	NA	NA	NA	NA	NA	NA	intergenic	TRIML1,FRG1
27	17925011	NA	NA	3.10424e-07	NA	NA	NA	NA	NA	NA	NA	NA	NA	NA	NA	NA	intergenic	TRIML1,FRG1
27	18395883	NA	2.83338e-07	4.97799e-07	NA	NA	NA	NA	NA	NA	NA	NA	NA	NA	NA	NA	intergenic	TRIML1,FRG1
27	19143541	1.11449e-07	NA	NA	NA	NA	NA	NA	NA	NA	NA	NA	NA	NA	NA	NA	intergenic	TRIML1,FRG1
27	27142850	NA	2.8161e-07	5.84068e-07	NA	NA	NA	NA	NA	NA	NA	NA	NA	NA	NA	NA	intronic	WRN
27	38165162	3.82832e-07	NA	NA	NA	NA	NA	NA	NA	NA	NA	NA	NA	NA	NA	NA	intronic	CSGALNACT1
27	38165769	2.72288e-07	NA	NA	NA	NA	NA	NA	NA	NA	NA	NA	NA	NA	NA	NA	intronic	CSGALNACT1
27	38165878	2.44007e-11	NA	NA	NA	NA	NA	NA	NA	NA	NA	NA	NA	NA	NA	NA	intronic	CSGALNACT1
27	38165892	1.78746e-09	NA	NA	NA	NA	NA	NA	NA	NA	NA	NA	NA	NA	NA	NA	intronic	CSGALNACT1
27	38165907	2.44007e-11	NA	NA	NA	NA	NA	NA	NA	NA	NA	NA	NA	NA	NA	NA	intronic	CSGALNACT1
27	38166186	7.10419e-07	NA	NA	NA	NA	NA	NA	NA	NA	NA	NA	NA	NA	NA	NA	intronic	CSGALNACT1
27	38166225	6.59498e-07	NA	NA	NA	NA	NA	NA	NA	NA	NA	NA	NA	NA	NA	NA	intronic	CSGALNACT1
27	38199590	7.75826e-07	NA	NA	NA	NA	NA	NA	NA	NA	NA	NA	NA	NA	NA	NA	intronic	CSGALNACT1
28	2091503	9.0041e-07	NA	NA	NA	NA	NA	NA	NA	NA	NA	NA	NA	NA	NA	NA	intergenic	URB2,GALNT2
28	2308485	7.67381e-07	NA	NA	NA	NA	NA	NA	NA	NA	NA	NA	NA	NA	NA	NA	intergenic	GALNT2,PGBD5
28	2373850	7.01279e-07	NA	NA	NA	NA	NA	NA	NA	NA	NA	NA	NA	NA	NA	NA	intronic	PGBD5
28	2373855	3.31504e-07	NA	NA	NA	NA	NA	NA	NA	NA	NA	NA	NA	NA	NA	NA	intronic	PGBD5
28	3215274	8.51626e-07	NA	NA	NA	NA	NA	NA	NA	NA	NA	NA	NA	NA	NA	NA	intronic	LOC614741
28	4276111	1.85316e-07	NA	NA	NA	NA	NA	NA	NA	NA	NA	NA	NA	NA	NA	NA	intergenic	LOC533307,TSNAX
28	4289069	6.2819e-07	NA	NA	NA	NA	NA	NA	NA	NA	NA	NA	NA	NA	NA	NA	intergenic	LOC533307,TSNAX
28	4290606	8.25051e-07	NA	NA	NA	NA	NA	NA	NA	NA	NA	NA	NA	NA	NA	NA	intergenic	LOC533307,TSNAX
[truncated: 207 more rows]

## Sheet: loci for NOT in Yunling
Associated loci	Leading SNP	Trait	Pvalue	Overlap for GWAS in Brahman and Yunling
1:11862858-12396906	1:12124417	LFN, PON, VFN	5.01681e-09	NO
1:13028963-14519572	1:14070464	DUR	5.01912e-09	YES
1:23366965-24559570	1:23382297	LFN, VFN	1.2936e-10	YES
1:96021243-96031129	1:96031129	DUR	2.37941e-08	NO
1:98692141-99537890	1:98692141	DUR	5.40959e-08	NO
1:102251827-102348123	1:102256715	LFN	1.30184e-07	NO
1:102650046-102680270	1:102680224	DUR	2.64771e-10	NO
1:105605339-106777572	1:105662595	LFN, PON, UFN, VFN	2.34783e-11	NO
1:116905083-117406275	1:116905234	UFN	1.98362e-10	NO
1:142608979-142767966	1:142755190	HFN, LFN, PON, UFN	4.82322e-09	NO
2:11541944-12535489	2:12196716	APN, HFN, LFN, PC1, PON, RMN, UFN	6.12412e-09	YES
2:13864488-16410692	2:15697518	APN, HFN, LFN, PON, RMN	7.35536e-09	NO
2:17654048-24278145	2:17909630	APN, HFN, LFN, PC1, PON, RMN, VFN	6.37188e-11	YES
3:3840124-3842596	3:3840124	UFN	1.55159e-07	NO
3:65814665-65820454	3:65815818	APN	6.16303e-08	NO
3:67195846-68094779	3:67486641	APN, HFN, LFN, LHN, PC1, PON, RMN	5.20511e-10	NO
3:84808115-84878173	3:84808217	LAT	3.67282e-07	NO
3:120685865-120766812	3:120766812	UFN	3.66333e-08	NO
4:51342083-52808876	4:52084870	UFN	6.85238e-08	NO
4:55430147-56708397	4:55430147	APN, FDN	1.10822e-07	NO
4:61004773-61556848	4:61556848	UFN	6.67115e-08	NO
4:75873368-76315767	4:75895448	DUR	9.05706e-09	NO
5:78852575-79505629	5:79505629	VFN	1.29676e-08	NO
5:81030376-81529610	5:81529610	LHN	6.57242e-08	NO
6:24296359-24397510	6:24397289	DUR	1.79761e-09	NO
6:33314836-34300136	6:34300136	UFN	1.13877e-07	NO
6:35487286-35517005	6:35517005	VFN	2.08784e-07	NO
6:53183543-53745625	6:53745609	DUR	1.17354e-10	YES
6:57229243-57437315	6:57288155	UFN	3.20359e-08	NO
6:62153552-63168165	6:62171532	HFN, LFN, PON, UFN, VFN	3.78149e-11	NO
6:64121181-64346884	6:64337588	UFN	1.99113e-08	NO
6:116889558-116906141	6:116906093	LFN	1.22073e-07	NO
7:8830366-10261863	7:9220280	APN, HFN, LFN	2.53317e-08	NO
7:31190232-31204176	7:31190299	DUR	7.05553e-09	NO
7:35722727-35739806	7:35739806	LFN	1.08004e-07	NO
7:48534462-48553132	7:48539781	APN, HFN, LFN	6.84511e-08	NO
7:51590324-52711394	7:52552999	APN, FDN, HFN, LFN, PC1, PON, RMN	1.27334e-09	YES
7:57801851-57915793	7:57915691	APN, HFN, LFN, RMN	7.48908e-08	NO
7:61140452-61180687	7:61142397	APN, RMN	2.04808e-08	NO
7:62736849-62834873	7:62743333	APN, HFN, LFN, PC1, PON, RMN	3.54506e-09	NO
7:67838835-67909629	7:67838835	LHN	4.247e-07	NO
7:69068989-69071883	7:69069519	DUR	1.86242e-08	NO
7:71698513-72032434	7:71982611	DUR	2.50842e-11	NO
7:74298618-74935609	7:74935609	DUR	3.18479e-11	YES
7:77614275-77808234	7:77808234	DUR	5.11986e-08	YES
7:101780560-102457042	7:102427767	PNN, RMN	1.3974e-08	NO
7:103630265-103751073	7:103630265	VFN	1.062e-07	NO
8:21877819-22447260	8:21910290	DUR	4.55717e-08	NO
8:31642766-31689118	8:31689118	HFN	2.00179e-09	NO
8:42503990-44449401	8:42503990	HFN, LFN, PON	4.84272e-08	NO
8:65196859-65204948	8:65204928	DUR	4.64766e-08	NO
9:31640067-31689960	9:31640067	RMN	8.10049e-08	NO
9:76013004-76209389	9:76209389	LHN	5.51356e-09	NO
9:104404484-104432819	9:104427876	APN, HFN, LFN, PC1, PON, RMN, UFN	1.03511e-10	NO
10:8955649-9026819	10:9026819	HFN	2.32018e-08	NO
10:12080914-12161144	10:12156483	HFN, LFN, PON, UFN, VFN	1.05051e-08	NO
10:25522261-26529257	10:26513376	LFN	3.3931e-09	NO
10:37482542-38254720	10:38127273	LHN	3.98812e-10	NO
10:38665097-40050655	10:38670588	APN, HFN, LFN, PC1, PON, RMN	1.84814e-11	NO
10:47024236-47186565	10:47186565	LHN	7.3552e-09	NO
10:77816785-78052521	10:78052521	VFN	8.63491e-08	NO
11:15551738-15560533	11:15551738	LFN	6.13226e-07	YES
11:22011747-22036456	11:22011809	LFN, UFN	1.38456e-08	NO
11:23450042-23542783	11:23542759	LFN	2.00684e-07	NO
11:31510823-32081537	11:32074388	LFN	9.21771e-09	NO
11:35212923-35251268	11:35251268	LHN	6.25004e-09	YES
11:50329170-50677678	11:50345421	UFN	2.04517e-07	NO
11:51909932-52016131	11:52016131	LFN	2.25429e-07	NO
11:54130145-55079927	11:54132174	UFN	1.17417e-09	NO
11:56022916-56742964	11:56361840	LFN, PON, UFN, VFN	1.26149e-10	NO
11:82348190-82361360	11:82361360	DUR	5.05661e-09	NO
12:16937058-16945378	12:16945378	VFN	5.57209e-08	NO
12:18776690-19164421	12:18782376	HFN, LFN, PON, VFN	5.90367e-12	NO
12:22216261-23330791	12:23251505	APN, HFN, LFN, PON	1.71425e-09	NO
12:43300132-44258765	12:43400451	LHN	9.92655e-10	YES
12:51735192-51857527	12:51735222	LHN	3.56671e-07	YES
12:80776221-81721687	12:80776258	APN, LFN, PC1, PON, RMN, UFN	1.31051e-10	NO
13:31296845-31511978	13:31475876	UFN	8.25353e-08	NO
13:64773441-64830253	13:64773441	UFN	7.98586e-08	NO
13:78415272-79000277	13:78426788	PON, UFN, VFN	3.83309e-09	NO
14:13311752-14050498	14:14036037	DUR	2.08286e-07	YES
14:19416497-19425058	14:19416542	LHN	1.35564e-07	YES
14:19529394-20772428	14:19673315	LFN, UFN, VFN	3.83797e-09	NO
14:41197585-41208212	14:41197585	VFN	2.62679e-07	NO
14:65726230-66053496	14:66050555	APN, HFN, LFN, PC1, PON, UFN, VFN	5.49887e-09	NO
14:77650591-77671147	14:77671147	DUR	8.77726e-08	NO
15:287122-857817	15:857707	DUR	1.15036e-07	NO
15:74541540-77255183	15:76274681	HFN, PC1, PON, VFN	6.97143e-09	YES
15:80144852-81630721	15:81271170	APN, DUR, HFN, LFN, LHN, PC1, PON, RMN, UFN, VFN	4.10693e-10	NO
15:83214460-83639788	15:83240527	APN, HFN, LFN, PC1, PON, RMN, UFN, VFN	3.64251e-11	NO
16:40419315-41414352	16:40946767	PON, UFN, VFN	9.70163e-10	NO
16:44181084-48998857	16:46139288	HFN, LFN, PON, UFN, VFN	1.47688e-09	NO
16:50820793-50832938	16:50820793	LAT	5.84481e-08	YES
16:54150080-54382431	16:54316464	LFN, PON, UFN, VFN	1.77736e-08	NO
16:61494773-62498715	16:62498715	LAT	3.21315e-07	NO
16:70283775-70290119	16:70286984	UFN, VFN	1.10052e-08	NO
16:71994395-72290017	16:72230737	LFN	1.49666e-08	NO
16:73283910-74459395	16:73725811	APN, HFN, LFN, PC1, PON, RMN, UFN, VFN	2.89593e-09	YES
16:76064579-76226332	16:76180673	APN, PON, RMN, UFN, VFN	3.28449e-09	NO
17:12547592-12757808	17:12757761	LFN, PON, UFN, VFN	3.69329e-08	NO
17:37006124-38388589	17:37664204	LFN, PON, UFN	2.838e-08	NO
18:14125655-14280940	18:14125655	APN, HFN, LFN, PON, RMN	1.2838e-09	YES
19:5573905-6359097	19:6359097	FDN, PC1	1.15714e-09	NO
19:41159839-41165935	19:41159839	LFN, VFN	4.30147e-09	NO
19:46085878-47531824	19:46976208	LFN	1.97464e-07	NO
20:2235579-2655587	20:2655587	UFN	8.47378e-10	NO
20:6749048-6826707	20:6749048	DUR	2.81353e-10	NO
20:11310346-11455583	20:11455583	APN	1.70158e-07	NO
20:12215800-12609354	20:12565335	APN, HFN	3.06225e-08	NO
20:14994972-15393739	20:14994972	APN, HFN, LFN, PON	2.41358e-09	YES
21:13025562-13238961	21:13129275	LFN, PON, UFN, VFN	6.67299e-10	NO
21:14282229-15865051	21:14984289	LFN, PON	9.07707e-10	NO
21:17135880-17522654	21:17135889	LFN, PON, VFN	7.53829e-09	NO
21:20755079-20787648	21:20755079	LFN	2.89184e-07	NO
21:39392525-39491897	21:39392525	LFN	2.1623e-09	NO
22:4247838-4471435	22:4372880	PNN	1.63234e-07	NO
22:29004149-29764859	22:29741302	DUR	2.64957e-09	NO
22:32538891-32961479	22:32961479	DUR	1.21698e-07	NO
22:37699352-37703028	22:37699476	LHN	3.97763e-08	NO
22:38485906-38515853	22:38515853	RMN	1.5281e-07	NO
22:40192319-43030012	22:42631044	APN, HFN, LFN, PC1, PON, RMN	1.64251e-10	NO
23:3435124-3488267	23:3479229	APN, RMN	7.76205e-10	NO
23:6785080-7206284	23:7150942	APN, RMN	1.23987e-09	NO
23:28914938-28916204	23:28915341	APN, HFN, LFN, PON, RMN	6.76882e-10	NO
23:34070733-34590619	23:34464555	APN, PNN, RMN	1.25446e-07	NO
23:47743196-48085231	23:47743196	LAT	7.38393e-09	YES
24:614840-1817388	24:646054	HFN, LFN, PON, UFN, VFN	1.9845e-11	NO
24:3430374-4256935	24:3430374	DUR	6.33904e-12	YES
24:7777027-7897669	24:7777027	DUR	8.7655e-08	NO
24:53643562-54911703	24:53967572	DUR	2.98022e-07	NO
24:56461128-57219749	24:56461128	UFN, VFN	7.76488e-09	NO
24:59582771-59711156	24:59582771	UFN	3.79513e-09	NO
25:9905812-9922589	25:9922589	VFN	4.97332e-07	NO
25:16242465-16355842	25:16242465	UFN	7.83694e-08	NO
26:8216357-8230319	26:8216357	LAT	1.35524e-07	NO
26:34610428-34641004	26:34610428	DUR	2.84921e-08	NO
26:40225943-40730121	26:40225943	DUR	1.11833e-07	NO
26:45578204-45616334	26:45584518	LFN	2.72988e-07	NO
26:46747224-46808851	26:46763015	PON	5.3907e-08	NO
27:15404976-18395883	27:16324553	LFN, PON, UFN, VFN	2.99237e-10	NO
27:38165162-38199590	27:38165907	LHN	2.44007e-11	NO
28:2091503-3215274	28:2373855	LHN	3.31504e-07	NO
28:4276111-4290606	28:4276111	LHN	1.85316e-07	NO
28:28696290-29857223	28:28696290	LHN	4.62517e-09	NO
28:38894610-39457068	28:39457068	UFN, VFN	1.7613e-08	NO
29:8081737-8183341	29:8178332	UFN	2.16426e-08	NO
29:10564432-11405222	29:10575977	UFN	1.64702e-14	NO
29:22286638-29106212	29:27988363	APN, HFN, LFN, PC1, PON, RMN, UFN, VFN	9.26844e-11	NO
29:31069132-31112125	29:31112125	LHN	1.89399e-07	NO
29:31346341-32740271	29:31722524	LFN, PON, UFN	4.25669e-08	NO
29:40784919-41794951	29:41794932	LHN	4.98894e-08	YES
29:47761818-47814243	29:47761818	LHN	5.95859e-08	NO
