# Supplementary material for: Genome-wide Association Studies Identify Quantitative Trait Loci Affecting Cattle Temperament
Source: Research Square preprint supplement (doi:10.21203/rs.3.rs-107748/v1), 2020-11-19
Supplement: Supplementary file 3 [file cf4fe66435545c6ab9293697.xlsx]

## Sheet: Sheet1
Trait	SNP marker	minor allele	major allele	beta	se	Pward	Func.refGene	Gene.refGene	GeneDetail.refGene
LHO	4:56579086	*	G	-0.303716	0.0567925	3.1847e-07	intronic	DOCK4	.
LHO	4:62737059	A	T	0.307659	0.058416	4.63663e-07	intronic	BMPER	.
LHO	4:64755925	A	G	0.317609	0.0582594	1.95915e-07	intergenic	PDE1C,PPP1R17	dist\x3d40234\x3bdist\x3d3406
LHO	4:66065780	G	A	-0.301592	0.0591301	9.89553e-07	intergenic	LOC107132410,MTURN	dist\x3d10043\x3bdist\x3d115192
LHO	5:15413462	A	G	-0.313176	0.0594687	4.64608e-07	intergenic	ALX1,RASSF9	dist\x3d474265\x3bdist\x3d54931
LHO	5:73689469	C	T	0.302398	0.0588023	8.1771e-07	intergenic	MCM5,RASD2	dist\x3d37620\x3bdist\x3d59576
LHO	8:42321507	T	C	0.523007	0.0972589	2.77364e-07	intergenic	NONE,SMARCA2	dist\x3dNONE\x3bdist\x3d48267
LHO	12:44958542	C	T	0.437933	0.0802941	1.93633e-07	intergenic	TRNAC-GCA,DACH1	dist\x3d313822\x3bdist\x3d1111712
LHO	14:7741659	T	C	0.435356	0.0815682	3.34392e-07	intergenic	ZFAT,ST3GAL1	dist\x3d474933\x3bdist\x3d122985
LHO	14:9310223	G	A	0.493215	0.0906669	2.07071e-07	intergenic	EFR3A,ADCY8	dist\x3d156205\x3bdist\x3d443968
LHO	14:9319895	G	A	0.443627	0.0847294	5.34398e-07	intergenic	EFR3A,ADCY8	dist\x3d165877\x3bdist\x3d434296
LHO	14:9320878	T	C	0.47598	0.0931127	9.39905e-07	intergenic	EFR3A,ADCY8	dist\x3d166860\x3bdist\x3d433313
LHO	14:16208223	A	G	0.412491	0.080604	9.16271e-07	intergenic	LOC112449619,KLHL38	dist\x3d7641\x3bdist\x3d20731
LHO	14:67713628	A	G	0.305853	0.0593907	7.91327e-07	intergenic	SDC2,PTDSS1	dist\x3d5743\x3bdist\x3d179673
LHO	14:67719370	G	T	-0.3443	0.0595025	3.93626e-08	intergenic	SDC2,PTDSS1	dist\x3d11485\x3bdist\x3d173931
LHO	14:78155654	G	A	0.387506	0.0732884	4.21389e-07	intronic	RALYL	.
LHO	15:3713562	C	T	0.359879	0.0644688	1.05459e-07	intergenic	CASP4,PDGFD	dist\x3d443872\x3bdist\x3d545869
LHO	15:3741549	C	T	0.356052	0.0655501	2.1511e-07	intergenic	CASP4,PDGFD	dist\x3d471859\x3bdist\x3d517882
LHO	16:18802515	T	C	0.480886	0.0922634	5.95766e-07	intergenic	LOC529930,KCTD3	dist\x3d1012082\x3bdist\x3d16294
LHO	22:48692707	A	G	0.531031	0.100181	3.96215e-07	intronic	ALAS1	.
LHO	22:52888589	T	G	0.441949	0.0850778	6.45235e-07	intronic	LRRC2	.
LHO	23:49151800	T	C	0.455883	0.0888214	8.55791e-07	intronic	FARS2	.
LHO	24:983288	A	G	0.334976	0.0641475	5.69457e-07	intronic	ATP9B	.
LHO	24:1272971	C	G	0.333977	0.0630733	4.06749e-07	intergenic	SALL3,TRNAK-UUU	dist\x3d193782\x3bdist\x3d507349
LHO	24:1274870	T	C	0.394632	0.0683138	4.12436e-08	intergenic	SALL3,TRNAK-UUU	dist\x3d195681\x3bdist\x3d505450
LHO	24:1286105	C	T	0.35561	0.0634629	9.5286e-08	intergenic	SALL3,TRNAK-UUU	dist\x3d206916\x3bdist\x3d494215
LHO	27:11609979	T	C	0.30899	0.0539594	5.26999e-08	intergenic	TRNAS-ACU,TRNAC-GCA	dist\x3d169225\x3bdist\x3d505096
LHO	27:11610004	C	T	0.302947	0.0550661	1.54802e-07	intergenic	TRNAS-ACU,TRNAC-GCA	dist\x3d169250\x3bdist\x3d505071
LHO	27:11610048	A	G	0.291655	0.0529029	1.46588e-07	intergenic	TRNAS-ACU,TRNAC-GCA	dist\x3d169294\x3bdist\x3d505027
LHO	28:39267170	A	G	0.34768	0.0681199	9.74213e-07	intergenic	RGR,CCSER2	dist\x3d39802\x3bdist\x3d4539
UFO	1:75739044	C	T	19526.5	3751.83	6.16751e-07	intergenic	FGF12,LOC112448255	dist\x3d450716\x3bdist\x3d30052
UFO	1:101803778	G	C	25162	4640.88	2.25376e-07	intergenic	BCHE,SLITRK3	dist\x3d202623\x3bdist\x3d375521
UFO	1:116941369	G	T	31743.2	5086.92	4.08971e-09	intronic	MED12L	.
UFO	1:117385622	A	G	26484.9	5188.96	9.73538e-07	intergenic	SIAH2,TRNAR-CCU	dist\x3d4878\x3bdist\x3d7004
UFO	1:117388179	G	C	23037.4	4427	6.18676e-07	intergenic	SIAH2,TRNAR-CCU	dist\x3d7435\x3bdist\x3d4447
UFO	1:117429634	A	C	24380.3	4500.6	2.30396e-07	intergenic	TRNAR-CCU,ERICH6	dist\x3d36936\x3bdist\x3d3461
UFO	1:117429668	G	A	27871.6	4818.89	3.98436e-08	intergenic	TRNAR-CCU,ERICH6	dist\x3d36970\x3bdist\x3d3427
UFO	1:117429775	T	C	28032.7	5053.95	1.24932e-07	intergenic	TRNAR-CCU,ERICH6	dist\x3d37077\x3bdist\x3d3320
UFO	1:117429938	A	G	31126.5	5050.34	6.0432e-09	intergenic	TRNAR-CCU,ERICH6	dist\x3d37240\x3bdist\x3d3157
UFO	1:136473881	C	G	30633	5433.31	8.07347e-08	intergenic	TMEM108,NPHP3	dist\x3d54911\x3bdist\x3d340909
UFO	1:141536993	G	T	25545.6	4992.2	9.17924e-07	intergenic	BACE2,FAM3B	dist\x3d49846\x3bdist\x3d14085
UFO	1:142343942	C	T	29934.5	5207.87	4.74541e-08	intronic	UMODL1	.
UFO	1:142360920	C	T	23096.7	4251.81	2.1466e-07	intronic	UMODL1	.
UFO	1:144581108	G	T	27714.9	5108.56	2.21846e-07	intronic	TSPEAR	.
UFO	1:147127854	T	C	31416.8	5104.98	6.3279e-09	intronic	RUNX1	.
UFO	1:147379983	C	T	28822.8	5647.2	9.74271e-07	intergenic	RUNX1,SETD4	dist\x3d135254\x3bdist\x3d936052
UFO	1:155812588	A	G	29439.6	5621.67	5.3195e-07	intergenic	SATB1,KCNH8	dist\x3d281341\x3bdist\x3d527805
UFO	1:156934066	T	C	28759.6	4755.19	1.07923e-08	intergenic	KCNH8,EFHB	dist\x3d90127\x3bdist\x3d190971
UFO	1:156939828	A	G	27505.3	5198.73	4.14861e-07	intergenic	KCNH8,EFHB	dist\x3d95889\x3bdist\x3d185209
UFO	2:1477642	T	C	29303.3	5464.98	2.98095e-07	downstream	AMER3	.
UFO	2:3330933	A	G	31081.2	5806.97	3.11749e-07	intergenic	PLEKHB2,HS6ST1	dist\x3d1361136\x3bdist\x3d856455
UFO	2:3383402	A	G	29980.9	5477.57	1.76808e-07	intergenic	PLEKHB2,HS6ST1	dist\x3d1413605\x3bdist\x3d803986
UFO	2:3383440	G	A	30612.2	5679.52	2.61677e-07	intergenic	PLEKHB2,HS6ST1	dist\x3d1413643\x3bdist\x3d803948
UFO	2:3387146	C	T	31178.9	5663.06	1.51795e-07	intergenic	PLEKHB2,HS6ST1	dist\x3d1417349\x3bdist\x3d800242
UFO	2:3390633	A	G	27669.9	4960.39	1.07522e-07	intergenic	PLEKHB2,HS6ST1	dist\x3d1420836\x3bdist\x3d796755
UFO	2:3390647	A	G	28351.6	5078.23	1.05089e-07	intergenic	PLEKHB2,HS6ST1	dist\x3d1420850\x3bdist\x3d796741
UFO	2:3390653	G	C	28215.3	4997.39	7.76853e-08	intergenic	PLEKHB2,HS6ST1	dist\x3d1420856\x3bdist\x3d796735
UFO	2:3390659	G	A	27589.6	4973.64	1.24644e-07	intergenic	PLEKHB2,HS6ST1	dist\x3d1420862\x3bdist\x3d796729
UFO	2:4910664	T	C	26813.1	5124.1	5.41955e-07	intronic	MYO7B	.
UFO	2:7768793	G	A	27474	5274.27	6.04073e-07	intergenic	DIRC1,GULP1	dist\x3d79036\x3bdist\x3d117984
UFO	2:12304166	A	G	23926.7	4554.24	4.92177e-07	intergenic	ZNF804A,TRNAC-GCA	dist\x3d384444\x3bdist\x3d1087101
UFO	2:17198573	C	T	23751.5	4378.12	2.21987e-07	intronic	ZNF385B	.
UFO	2:83411550	A	G	28567.9	5010.21	5.93143e-08	intergenic	NONE,SLC39A10	dist\x3dNONE\x3bdist\x3d802786
UFO	2:135912788	T	C	31210.7	5514.23	7.26105e-08	intergenic	ARHGEF19,EPHA2	dist\x3d1568\x3bdist\x3d32429
UFO	3:11484897	T	C	27900.5	5196.44	2.88345e-07	intergenic	LOC529950,LOC508806	dist\x3d5963\x3bdist\x3d7795
UFO	3:12265843	T	C	28491.7	5269.47	2.4167e-07	intergenic	LOC512286,KIRREL1	dist\x3d111788\x3bdist\x3d1362
UFO	3:12814891	C	G	24012	4618.71	6.32943e-07	intronic	FCRL5	.
UFO	3:30616094	A	G	25854.1	4945.66	5.54834e-07	downstream	PPM1J	.
UFO	3:35457663	A	G	25621.7	4841.94	4.13265e-07	intronic	VAV3	.
UFO	3:35648857	A	G	30152.8	4955.77	8.99426e-09	intronic	VAV3	.
UFO	3:35863644	A	G	27016.7	4936.98	1.77718e-07	intronic	NTNG1	.
UFO	3:39559373	C	T	27610.1	5369.79	8.20934e-07	intergenic	NONE,LOC539383	dist\x3dNONE\x3bdist\x3d183781
UFO	3:39562407	G	T	33246.1	5090.03	9.09445e-10	intergenic	NONE,LOC539383	dist\x3dNONE\x3bdist\x3d180747
UFO	3:40550285	*	G	22834.5	4319.02	4.22266e-07	intergenic	COL11A1,OLFM3	dist\x3d19614\x3bdist\x3d721430
UFO	3:40588372	G	T	24982.5	4484.45	1.11308e-07	intergenic	COL11A1,OLFM3	dist\x3d57701\x3bdist\x3d683343
UFO	3:40589928	T	C	22471.7	4391.31	9.17034e-07	intergenic	COL11A1,OLFM3	dist\x3d59257\x3bdist\x3d681787
UFO	3:40604796	C	A	30046.1	4568.77	7.19444e-10	intergenic	COL11A1,OLFM3	dist\x3d74125\x3bdist\x3d666919
UFO	3:42191734	G	T	17877.1	3489.03	8.90451e-07	intergenic	S1PR1,DPH5	dist\x3d152410\x3bdist\x3d67087
UFO	3:49282042	T	C	26361.5	5146.36	8.96357e-07	intronic	ARHGAP29	.
UFO	3:49400945	A	G	29365.3	5654.96	6.5062e-07	intronic	ABCA4	.
UFO	3:53270169	T	A	31631.8	5140.6	6.35432e-09	intergenic	ZNF326,LRRC8D	dist\x3d10437\x3bdist\x3d43018
UFO	3:94710560	G	T	26322.5	5029.17	5.38931e-07	intergenic	OSBPL9,EPS15	dist\x3d7972\x3bdist\x3d92138
UFO	3:105835869	C	T	30534.5	5768.98	4.10895e-07	intronic	ZMPSTE24	.
UFO	3:109104355	T	C	27377.5	5172.95	4.11701e-07	intergenic	GRIK3,MRPS15	dist\x3d28058\x3bdist\x3d326876
UFO	4:4366753	C	A	30019.5	5832.06	8.00421e-07	intergenic	NONE,COBL	dist\x3dNONE\x3bdist\x3d215817
UFO	4:13075234	C	T	31821.3	4967.64	1.74886e-09	intronic	DYNC1I1	.
UFO	4:26207771	G	T	27511.2	5391.35	9.79039e-07	intergenic	AHR,SNX13	dist\x3d351870\x3bdist\x3d113647
UFO	4:26240364	G	C	28110.2	5223.95	2.72799e-07	intergenic	AHR,SNX13	dist\x3d384463\x3bdist\x3d81054
UFO	4:51857060	C	T	27368.1	5082.97	2.68687e-07	intergenic	MET,CAV1	dist\x3d121413\x3bdist\x3d8691
UFO	4:60623398	A	C	25526.2	4926.01	6.83846e-07	intronic	AOAH	.
UFO	4:79113017	A	G	30815.4	5853.11	4.67703e-07	intergenic	GLI3,INHBA	dist\x3d47755\x3bdist\x3d166897
UFO	4:79124807	C	T	30234.9	5770.42	5.25072e-07	intergenic	GLI3,INHBA	dist\x3d59545\x3bdist\x3d155107
UFO	4:79124965	A	G	30823.5	5905.86	5.76856e-07	intergenic	GLI3,INHBA	dist\x3d59703\x3bdist\x3d154949
UFO	4:79167415	T	C	30220.2	5682.16	3.65021e-07	intergenic	GLI3,INHBA	dist\x3d102153\x3bdist\x3d112499
UFO	4:79174803	A	G	30114.9	5072.42	1.87642e-08	intergenic	GLI3,INHBA	dist\x3d109541\x3bdist\x3d105111
UFO	4:79174862	G	A	32780.6	5622.51	3.1753e-08	intergenic	GLI3,INHBA	dist\x3d109600\x3bdist\x3d105052
UFO	4:79174883	T	C	30011	5787.31	6.72264e-07	intergenic	GLI3,INHBA	dist\x3d109621\x3bdist\x3d105031
UFO	4:84061686	A	G	28961.1	5502.81	4.71678e-07	intergenic	LSM8,LOC112446347	dist\x3d1254664\x3bdist\x3d622372
UFO	5:64591015	A	G	27730.7	5437.54	9.92257e-07	intronic	ANO4	.
UFO	5:118912193	A	T	24802.9	4829.12	8.42223e-07	intergenic	FAM19A5,LOC531175	dist\x3d430525\x3bdist\x3d230858
UFO	6:5360205	G	A	24416	4531.46	2.63925e-07	intergenic	PRDM5,TRNAG-CCC	dist\x3d578216\x3bdist\x3d355551
UFO	6:37930955	*	A	28858.1	5254.64	1.61989e-07	intergenic	LCORL,SLIT2	dist\x3d373810\x3bdist\x3d1848320
UFO	6:37930956	*	G	28858.1	5254.64	1.61989e-07	intergenic	LCORL,SLIT2	dist\x3d373811\x3bdist\x3d1848319
UFO	6:37932891	G	A	28262.4	5284.41	3.17822e-07	intergenic	LCORL,SLIT2	dist\x3d375746\x3bdist\x3d1846384
UFO	6:40159515	A	G	30248.6	5750.99	4.7877e-07	intronic	SLIT2	.
UFO	6:40355542	A	G	27297.8	5035.01	2.25597e-07	intronic	KCNIP4	.
UFO	6:45319883	A	T	26077.7	4752.84	1.66e-07	intronic	SEL1L3	.
UFO	6:45916479	G	A	34796.4	5271.95	6.34773e-10	intergenic	RBPJ,CCKAR	dist\x3d28496\x3bdist\x3d3157
UFO	6:49174063	T	A	28484.1	5422.09	4.93043e-07	intergenic	TRNAS-GGA,PCDH7	dist\x3d656046\x3bdist\x3d780323
UFO	6:58754692	T	A	29762.4	5129.81	3.64858e-08	intronic	SMIM14	.
UFO	6:76396401	C	T	21962.8	4032.33	2.00535e-07	intergenic	TRNAC-GCA,ADGRL3	dist\x3d28793\x3bdist\x3d319905
UFO	6:94998535	T	C	29938.3	5292.49	7.37647e-08	intergenic	FGF5,CFAP299	dist\x3d20833\x3bdist\x3d27640
UFO	6:95051277	A	G	28900.5	5546.87	6.0087e-07	intronic	CFAP299	.
UFO	6:100638541	C	G	19624.6	3848.23	9.93247e-07	intronic	ARHGAP24	.
UFO	6:103687313	C	G	26212.3	5056.89	6.78996e-07	intergenic	TRNAG-CCC,STK32B	dist\x3d22757\x3bdist\x3d20250
UFO	7:26012209	A	G	30976.6	5362.32	4.1249e-08	intergenic	SLC12A2,CCDC192	dist\x3d159151\x3bdist\x3d165468
UFO	7:27835819	T	C	26861.7	5004.31	2.90295e-07	intergenic	GRAMD2B,ZNF608	dist\x3d358352\x3bdist\x3d1180710
UFO	7:43507138	G	T	27803.5	5423.95	8.8145e-07	intronic	WDR18	.
UFO	7:57741416	A	G	28720.2	5276.42	2.03913e-07	intergenic	GPR151,PPP2R2B	dist\x3d37110\x3bdist\x3d54778
UFO	7:68534469	G	A	27199.2	5067.75	2.91103e-07	intergenic	LOC100294726,TRNAG-CCC	dist\x3d77368\x3bdist\x3d44185
UFO	7:73988843	G	C	29013.8	4746.37	7.79481e-09	intergenic	GABRG2,CCNG1	dist\x3d87384\x3bdist\x3d1127102
UFO	7:74004065	G	T	29371	5370.12	1.80231e-07	intergenic	GABRG2,CCNG1	dist\x3d102606\x3bdist\x3d1111880
UFO	7:74004172	C	G	27586.9	5261.77	5.17296e-07	intergenic	GABRG2,CCNG1	dist\x3d102713\x3bdist\x3d1111773
UFO	7:94939154	A	G	29790.3	5692.72	5.41219e-07	downstream	GPR150	.
UFO	7:110480733	G	A	31800.8	5389.29	2.24475e-08	intronic	CAMK4	.
UFO	8:12738620	G	A	26512.7	4952.33	3.10046e-07	intergenic	TRNAC-ACA,MIR2285M-5	dist\x3d524613\x3bdist\x3d443395
UFO	8:34464604	T	G	22937.3	4459.4	8.1412e-07	intergenic	NONE,PTPRD	dist\x3dNONE\x3bdist\x3d1564043
UFO	8:34700252	A	G	33072.9	4699.3	6.14754e-11	intergenic	NONE,PTPRD	dist\x3dNONE\x3bdist\x3d1328395
UFO	8:67492507	T	C	27239.8	5221.34	5.8252e-07	intergenic	LZTS1,TRNAC-GCA	dist\x3d63628\x3bdist\x3d367011
UFO	8:74106889	T	G	23213.4	4227.53	1.62684e-07	intergenic	ADRA1A,STMN4	dist\x3d35510\x3bdist\x3d233368
UFO	8:112482674	A	G	27926.1	4926.19	6.9569e-08	intergenic	TMEM18,ALKAL2	dist\x3d5347\x3bdist\x3d256777
UFO	9:13164036	A	G	30728.4	5550.55	1.31379e-07	intergenic	SLC17A5,CD109	dist\x3d2604\x3bdist\x3d37746
UFO	9:13628450	A	G	26530.7	5101.98	6.29441e-07	intergenic	CD109,COL12A1	dist\x3d287423\x3bdist\x3d1032814
UFO	9:13628451	T	C	26530.7	5101.98	6.29441e-07	intergenic	CD109,COL12A1	dist\x3d287424\x3bdist\x3d1032813
UFO	9:14397060	C	T	26805.5	5099.81	4.86655e-07	intergenic	CD109,COL12A1	dist\x3d1056033\x3bdist\x3d264204
UFO	9:14397086	G	A	29011.1	5210.64	1.13045e-07	intergenic	CD109,COL12A1	dist\x3d1056059\x3bdist\x3d264178
UFO	9:26940602	C	T	27326.6	4975.22	1.61524e-07	intronic	NKAIN2	.
UFO	9:36047412	C	T	23910.4	4577.43	5.65339e-07	intergenic	FRK,HS3ST5	dist\x3d1353959\x3bdist\x3d33715
UFO	9:37308510	*	A	31297.1	4809.98	1.03554e-09	intergenic	MIR2479,LAMA4	dist\x3d266535\x3bdist\x3d867572
UFO	9:37308511	*	A	31297.1	4809.98	1.03554e-09	intergenic	MIR2479,LAMA4	dist\x3d266536\x3bdist\x3d867571
UFO	9:37341565	T	G	27292.2	5111.17	3.30673e-07	intergenic	MIR2479,LAMA4	dist\x3d299590\x3bdist\x3d834517
UFO	9:37342800	T	C	28937	4796.57	1.16445e-08	intergenic	MIR2479,LAMA4	dist\x3d300825\x3bdist\x3d833282
UFO	9:37346676	T	C	22398	4372.1	8.94014e-07	intergenic	MIR2479,LAMA4	dist\x3d304701\x3bdist\x3d829406
UFO	9:37358938	C	A	24001.7	4625	6.60392e-07	intergenic	MIR2479,LAMA4	dist\x3d316963\x3bdist\x3d817144
UFO	9:37359049	G	A	26249.8	4912.26	3.24579e-07	intergenic	MIR2479,LAMA4	dist\x3d317074\x3bdist\x3d817033
UFO	9:37401598	T	C	27952.8	4826.09	3.82791e-08	intergenic	MIR2479,LAMA4	dist\x3d359623\x3bdist\x3d774484
UFO	9:37407903	T	C	26579.6	4868.01	1.88285e-07	intergenic	MIR2479,LAMA4	dist\x3d365928\x3bdist\x3d768179
UFO	9:37408283	A	C	25061.9	4723.62	3.87284e-07	intergenic	MIR2479,LAMA4	dist\x3d366308\x3bdist\x3d767799
UFO	9:37424376	G	T	28932.2	5299.18	1.88569e-07	intergenic	MIR2479,LAMA4	dist\x3d382401\x3bdist\x3d751706
UFO	9:37431145	G	T	24187.1	4627.59	5.57193e-07	intergenic	MIR2479,LAMA4	dist\x3d389170\x3bdist\x3d744937
UFO	9:42815953	A	G	25712	4940.83	6.18262e-07	intronic	PDSS2	.
UFO	9:49997974	G	T	21801.3	4096.34	3.58781e-07	intergenic	MCHR2,PRDM13	dist\x3d49607\x3bdist\x3d199345
UFO	9:52577478	G	A	25296	4951.62	9.53802e-07	intronic	MMS22L	.
UFO	9:52598935	T	G	30018.6	5132.37	2.89768e-08	intronic	MMS22L	.
UFO	9:54077643	T	C	30964.3	5524.96	9.48267e-08	intergenic	FUT9,MANEA	dist\x3d431343\x3bdist\x3d219148
UFO	9:54077660	T	C	30860.3	5359.5	4.51732e-08	intergenic	FUT9,MANEA	dist\x3d431360\x3bdist\x3d219131
UFO	9:54107048	G	A	31209.5	5702.22	1.76957e-07	intergenic	FUT9,MANEA	dist\x3d460748\x3bdist\x3d189743
UFO	9:81237484	T	G	28897.1	5041.02	5.11752e-08	intronic	PHACTR2	.
UFO	9:81247038	T	G	33107.6	5561.6	1.73419e-08	intronic	PHACTR2	.
UFO	9:100131142	T	C	31582.9	5301.57	1.69684e-08	intergenic	TRNAC-GCA,C9H6orf118	dist\x3d475320\x3bdist\x3d293008
UFO	9:104428207	T	C	26356.4	4781.68	1.47324e-07	intergenic	LOC100301231,TRNAY-GUA	dist\x3d4879\x3bdist\x3d43885
UFO	10:56898788	T	A	31522.8	5777.44	1.91752e-07	intergenic	WDR72,ONECUT1	dist\x3d118249\x3bdist\x3d707687
UFO	11:25986082	A	G	27737.2	4925.52	8.33606e-08	intronic	PLEKHH2	.
UFO	11:25991670	A	C	26702.8	4872.97	1.71553e-07	intronic	PLEKHH2	.
UFO	11:56936481	C	G	25281.2	4863.23	6.34161e-07	intergenic	REG3A,TRNAC-GCA	dist\x3d216862\x3bdist\x3d253789
UFO	11:63740413	G	C	21628.9	4219.21	8.80553e-07	intronic	SPRED2	.
UFO	11:76776398	C	T	29372.7	5387.97	1.96005e-07	intergenic	LOC112448894,MIR2285AF-1	dist\x3d1202336\x3bdist\x3d621699
UFO	11:84085122	G	A	30797.7	5263.16	2.85993e-08	intergenic	FAM84A,LOC782101	dist\x3d408867\x3bdist\x3d4773
UFO	12:8095291	C	T	27738.8	5434.65	9.73643e-07	intergenic	NONE,LOC101905933	dist\x3dNONE\x3bdist\x3d945345
UFO	12:16720336	G	C	23801.2	4571.33	6.10883e-07	intergenic	LRCH1,ESD	dist\x3d12125\x3bdist\x3d3530
UFO	12:23339851	A	G	24935	4795.84	6.31679e-07	intronic	FREM2	.
UFO	12:23339866	T	C	27926.8	4608.04	1.01412e-08	intronic	FREM2	.
UFO	12:26516038	C	T	24499.9	4742.81	7.36278e-07	intergenic	NBEA,TRNAC-GCA	dist\x3d74373\x3bdist\x3d59519
UFO	12:49812303	A	T	21609.4	4191.37	7.70584e-07	intergenic	KLF12,TRNAY-AUA	dist\x3d1009466\x3bdist\x3d373906
UFO	12:49813938	C	T	23200.2	4519.19	8.51372e-07	intergenic	KLF12,TRNAY-AUA	dist\x3d1011101\x3bdist\x3d372271
UFO	12:49814626	T	C	23112.8	4121.01	9.29859e-08	intergenic	KLF12,TRNAY-AUA	dist\x3d1011789\x3bdist\x3d371583
UFO	12:49814863	C	T	22266.5	4362.33	9.72794e-07	intergenic	KLF12,TRNAY-AUA	dist\x3d1012026\x3bdist\x3d371346
UFO	12:49840204	G	A	29825.2	5595.16	3.45085e-07	intergenic	KLF12,TRNAY-AUA	dist\x3d1037367\x3bdist\x3d346005
UFO	12:49866012	G	A	25765.9	4566.18	7.89022e-08	intergenic	KLF12,TRNAY-AUA	dist\x3d1063175\x3bdist\x3d320197
UFO	12:49866022	T	C	25765.9	4566.18	7.89022e-08	intergenic	KLF12,TRNAY-AUA	dist\x3d1063185\x3bdist\x3d320187
UFO	12:50427639	A	G	30126	5281.02	5.85564e-08	intronic	TBC1D4	.
UFO	12:50498106	G	C	25621.7	4794.07	3.23475e-07	intronic	TBC1D4	.
UFO	12:71016425	C	G	27929.7	5176.35	2.54781e-07	intergenic	LOC100336232,LOC522174	dist\x3d20695\x3bdist\x3d125498
UFO	12:74190258	A	G	26668.1	5200.38	8.73338e-07	intergenic	HS6ST3,OXGR1	dist\x3d113917\x3bdist\x3d1707
UFO	12:74190273	T	C	27672.6	5210.1	3.77248e-07	intergenic	HS6ST3,OXGR1	dist\x3d113932\x3bdist\x3d1692
UFO	12:77347248	G	T	28464.5	5562.81	9.18669e-07	intergenic	MIR2892,NALCN	dist\x3d49400\x3bdist\x3d218924
UFO	13:25208380	G	T	28704.5	5423.12	4.10667e-07	intronic	KIAA1217	.
UFO	13:38099825	C	A	31680.8	5916.99	3.09127e-07	intergenic	BANF2,SNX5	dist\x3d19637\x3bdist\x3d115285
UFO	13:38117163	A	G	27133	5264.42	7.76422e-07	intergenic	BANF2,SNX5	dist\x3d36975\x3bdist\x3d97947
UFO	13:44741391	T	C	29102.6	5101.61	5.8556e-08	intergenic	KLF6,LOC112449302	dist\x3d135346\x3bdist\x3d78541
UFO	13:45281649	C	T	22654	4231.94	3.10751e-07	intergenic	PFKP,ADARB2	dist\x3d120833\x3bdist\x3d758044
UFO	13:45281835	A	C	22932.7	4224.63	2.18605e-07	intergenic	PFKP,ADARB2	dist\x3d121019\x3bdist\x3d757858
UFO	13:45281950	G	A	25139.3	4277.73	2.5262e-08	intergenic	PFKP,ADARB2	dist\x3d121134\x3bdist\x3d757743
UFO	13:45281964	C	T	25139.3	4277.73	2.5262e-08	intergenic	PFKP,ADARB2	dist\x3d121148\x3bdist\x3d757729
UFO	13:45282046	T	C	25008.4	4308.32	3.59848e-08	intergenic	PFKP,ADARB2	dist\x3d121230\x3bdist\x3d757647
UFO	13:45282095	T	C	22787.8	4201.45	2.23291e-07	intergenic	PFKP,ADARB2	dist\x3d121279\x3bdist\x3d757598
UFO	13:45282591	C	T	22582	4178.74	2.44992e-07	intergenic	PFKP,ADARB2	dist\x3d121775\x3bdist\x3d757102
UFO	13:47249564	C	G	25359.2	4779.02	3.86041e-07	intronic	SLC23A2	.
UFO	13:47524610	A	G	32040.1	4986.55	1.5803e-09	intergenic	CDS2,LOC787679	dist\x3d25894\x3bdist\x3d21707
UFO	13:47535028	T	C	23302.5	4388.8	3.80402e-07	intergenic	CDS2,LOC787679	dist\x3d36312\x3bdist\x3d11289
UFO	13:47535029	G	A	23302.5	4388.8	3.80402e-07	intergenic	CDS2,LOC787679	dist\x3d36313\x3bdist\x3d11288
UFO	13:47545559	T	C	33027.2	5028.53	7.51986e-10	downstream	LOC787679	.
UFO	13:47549044	A	T	26397.3	4890.23	2.52021e-07	UTR3	PROKR2	XM_005214437.4:c.*1231A>T
UFO	13:47572546	T	C	29963	5101.56	2.56985e-08	intergenic	PROKR2,GPCPD1	dist\x3d11925\x3bdist\x3d144811
UFO	13:48671839	C	T	30224.2	5891.26	8.64481e-07	intergenic	TRNAC-GCA,BMP2	dist\x3d261479\x3bdist\x3d480324
UFO	13:48671844	A	G	30224.2	5891.26	8.64481e-07	intergenic	TRNAC-GCA,BMP2	dist\x3d261484\x3bdist\x3d480319
UFO	13:51792885	G	A	27128.2	5302.95	9.23833e-07	intronic	C13H20orf194	.
UFO	13:62031491	A	T	26881.9	5058.6	3.72436e-07	intergenic	NOL4L,COMMD7	dist\x3d25876\x3bdist\x3d70929
UFO	13:62032512	G	A	28618.7	5185.25	1.42319e-07	intergenic	NOL4L,COMMD7	dist\x3d26897\x3bdist\x3d69908
UFO	13:65093568	T	C	26194.1	5070.36	7.34854e-07	intergenic	SCAND1,CNBD2	dist\x3d7181\x3bdist\x3d6674
UFO	13:74147801	T	C	32991.7	5219.41	2.7055e-09	intronic	TKDP2	.
UFO	13:76889008	A	G	29713.5	5786.82	8.47688e-07	intronic	PREX1	.
UFO	13:79005564	T	C	28286.2	5419.15	5.75453e-07	intergenic	KCNG1,TRNAR-UCU	dist\x3d70602\x3bdist\x3d24288
UFO	13:79888340	A	T	23070.5	4433.01	6.17522e-07	intergenic	ZFP64,TSHZ2	dist\x3d6146\x3bdist\x3d692151
UFO	14:9799801	T	G	28052.5	5350.84	5.1793e-07	intronic	ADCY8	.
UFO	14:50477166	G	T	28423.3	5462.24	6.1938e-07	intergenic	TRPS1,CSMD3	dist\x3d1568167\x3bdist\x3d328615
UFO	14:74236851	G	T	24323.5	4755.8	9.28788e-07	intergenic	RIPK2,MMP16	dist\x3d300397\x3bdist\x3d145107
UFO	14:76710154	G	C	25600.3	4903.67	5.7293e-07	intergenic	PSKH2,TRNAS-GGA	dist\x3d71289\x3bdist\x3d32786
UFO	14:76710165	T	C	27241.2	4862.03	9.55577e-08	intergenic	PSKH2,TRNAS-GGA	dist\x3d71300\x3bdist\x3d32775
UFO	14:76710169	C	T	27241.2	4862.03	9.55577e-08	intergenic	PSKH2,TRNAS-GGA	dist\x3d71304\x3bdist\x3d32771
UFO	14:81849683	A	G	28852.2	5280.3	1.84705e-07	intronic	MTBP	.
UFO	14:81890611	C	T	29763.3	5594.38	3.62005e-07	intronic	SNTB1	.
UFO	14:82126737	A	G	29729.8	5089.09	2.99917e-08	intergenic	SNTB1,SLC2A5	dist\x3d116856\x3bdist\x3d231764
UFO	15:18503838	T	C	27966.6	5227.33	3.15135e-07	intronic	DDX10	.
UFO	15:37298507	*	T	27166.2	5018.44	2.34583e-07	intergenic	TRNAW-CCA,INSC	dist\x3d379993\x3bdist\x3d43901
UFO	15:37298508	*	A	27166.2	5018.44	2.34583e-07	intergenic	TRNAW-CCA,INSC	dist\x3d379994\x3bdist\x3d43900
UFO	15:37298533	A	G	26389.3	5014.24	4.71854e-07	intergenic	TRNAW-CCA,INSC	dist\x3d380019\x3bdist\x3d43875
UFO	15:57378708	A	T	26880.9	5172.64	6.39047e-07	intronic	SLC5A12	.
UFO	16:72697905	T	C	30397.7	5193.02	2.83162e-08	intronic	HHAT	.
UFO	17:8624439	T	C	25907.9	5060.18	9.06168e-07	intergenic	IQCM,TRNAC-GCA	dist\x3d80037\x3bdist\x3d65739
UFO	17:8835439	A	G	28464.2	5532.26	8.08465e-07	intergenic	TRNAC-GCA,NR3C2	dist\x3d145190\x3bdist\x3d745945
UFO	17:15429970	A	G	27012.2	5258.28	8.38484e-07	intronic	INPP4B	.
UFO	18:30862071	G	C	25255.8	4951.08	9.86867e-07	intergenic	TRNAC-ACA,CDH11	dist\x3d30506\x3bdist\x3d1820813
UFO	18:35509767	T	C	31568	5696.76	1.28115e-07	intronic	DUS2	.
UFO	18:35737619	G	T	28155.4	5498.65	9.04225e-07	intronic	SMPD3	.
UFO	18:35764865	G	C	31017	5484.51	7.42568e-08	intronic	SMPD3	.
UFO	18:37853973	T	C	26537.7	4468.24	1.85607e-08	intergenic	PSMD7,ZFHX3	dist\x3d864100\x3bdist\x3d266607
UFO	18:48386934	T	C	24883.3	4627.16	2.77111e-07	intronic	EIF3K	.
UFO	18:58745863	T	C	25465.8	4807.24	4.02392e-07	intronic	LOC100848991	.
UFO	18:58783407	C	A	28329.4	5431.67	5.86286e-07	exonic	LOC785630	.
UFO	18:63823985	C	T	27243.2	5017.84	2.17624e-07	intronic	SMIM17	.
UFO	19:605257	T	G	29016.5	5433.75	3.30162e-07	intronic	CA10	.
UFO	19:61221454	T	C	27768.7	5383.19	7.61108e-07	intronic	MAP2K6	.
UFO	20:1049957	T	C	29967.7	4874.21	6.5204e-09	intronic	SLIT3	.
UFO	20:1050011	C	T	29535.9	4527.8	9.50071e-10	intronic	SLIT3	.
UFO	20:1067319	T	A	29021.1	4765.26	8.73772e-09	intronic	SLIT3	.
UFO	20:5898907	C	T	28764.4	5612.81	8.86574e-07	intergenic	NSG2,MIR584-6	dist\x3d76773\x3bdist\x3d425185
UFO	20:6062390	C	G	28177.8	5509.68	9.29931e-07	intergenic	NSG2,MIR584-6	dist\x3d240256\x3bdist\x3d261702
UFO	20:66303305	A	G	25307.4	4733.25	3.20068e-07	intergenic	LOC104969118,PAPD7	dist\x3d61213\x3bdist\x3d146717
UFO	22:3046498	A	G	27399	4992.16	1.6471e-07	intergenic	ZCWPW2,RBMS3	dist\x3d104860\x3bdist\x3d808586
UFO	22:3147781	G	A	30384.9	5753.06	4.3301e-07	intergenic	ZCWPW2,RBMS3	dist\x3d206143\x3bdist\x3d707303
UFO	22:4431721	A	G	26832.2	5010.16	3.07203e-07	intronic	RBMS3	.
UFO	22:24837265	T	C	25971.3	4529.93	5.09584e-08	intergenic	CNTN4,CNTN6	dist\x3d557286\x3bdist\x3d106101
UFO	22:28038985	C	T	30807.8	5923.06	6.25843e-07	intergenic	CNTN3,PDZRN3	dist\x3d620498\x3bdist\x3d79371
UFO	23:1271768	*	G	32140.4	5739.22	9.68028e-08	intergenic	KHDRBS2,PRIM2	dist\x3d310542\x3bdist\x3d1288776
UFO	23:14980143	A	C	24514.4	4791.95	9.23575e-07	intronic	APOBEC2	.
UFO	23:39455472	C	T	26554.6	4766.33	1.11111e-07	downstream	TPMT	.
UFO	23:39455537	A	G	30413.2	4975.77	7.81731e-09	downstream	TPMT	.
UFO	23:41300475	A	G	27645.8	5245.05	4.54897e-07	intergenic	MYLIP,DTNBP1	dist\x3d287620\x3bdist\x3d82322
UFO	23:45512625	T	G	35538.6	5806.49	7.49979e-09	intronic	LOC100848875,LOC520336	.
UFO	23:47254437	T	C	25403.1	4972.09	9.51521e-07	intergenic	TRNAQ-CUG,EEF1E1	dist\x3d11370\x3bdist\x3d112825
UFO	24:1968379	C	T	20104.6	3814.23	4.5466e-07	intergenic	TRNAK-UUU,GALR1	dist\x3d187987\x3bdist\x3d177405
UFO	24:4886842	T	C	25679.7	4766.06	2.64013e-07	intergenic	TRNAA-CGC,NETO1	dist\x3d208155\x3bdist\x3d192991
UFO	24:7311830	A	G	30120	5895.46	9.52131e-07	intronic	CD226	.
UFO	24:24239268	T	A	21830.8	4195.36	6.19488e-07	intergenic	CCDC178,KLHL14	dist\x3d42680\x3bdist\x3d143415
UFO	24:47158129	C	T	32730.5	5781.43	7.2164e-08	intergenic	SKOR2,SMAD2	dist\x3d213075\x3bdist\x3d334553
UFO	24:50298718	A	G	31997.6	5122.29	3.95459e-09	intergenic	MAPK4,MRO	dist\x3d17639\x3bdist\x3d19979
UFO	24:52209832	C	A	25727.7	5018.19	8.78159e-07	intronic	LOC112444158	.
UFO	24:52466636	G	A	27518	5308.79	6.78978e-07	intergenic	LOC112444158,DCC	dist\x3d118940\x3bdist\x3d134791
UFO	24:52469412	A	G	30075	5535.53	2.13768e-07	intergenic	LOC112444158,DCC	dist\x3d121716\x3bdist\x3d132015
UFO	24:56721318	C	T	35209.9	6068.07	3.63714e-08	intronic	ONECUT2	.
UFO	24:56721827	G	A	32692.3	5910.75	1.34602e-07	intronic	ONECUT2	.
UFO	25:13091507	C	A	24462.1	4420.79	1.33065e-07	intronic	MKL2	.
UFO	25:13487357	C	T	26285.5	4920.34	3.26863e-07	intronic	PARN	.
UFO	25:15225904	C	G	24612.3	4663.53	4.4087e-07	intergenic	TRNAG-CCC,LOC100296255	dist\x3d524436\x3bdist\x3d101525
UFO	25:15259170	A	T	29015.2	4421.92	7.77157e-10	intergenic	TRNAG-CCC,LOC100296255	dist\x3d557702\x3bdist\x3d68259
UFO	25:15573919	C	T	20072.2	3859.05	6.25771e-07	intronic	XYLT1	.
UFO	25:31539923	T	C	22711.5	4387.62	7.01704e-07	intergenic	AUTS2,CASTOR2	dist\x3d542744\x3bdist\x3d1070779
UFO	26:9435410	T	C	29487.9	5152.2	5.34658e-08	intronic	ATAD1	.
UFO	26:22623088	G	A	27753	5172.05	2.92678e-07	intronic	ARMH3	.
UFO	26:22659049	G	A	29813.1	5492.01	2.18471e-07	intronic	ARMH3	.
UFO	26:22968844	T	C	28211.6	5492.82	8.42299e-07	intronic	GBF1	.
UFO	26:23233534	G	C	27051.1	5291.07	9.36822e-07	intronic	SUFU	.
UFO	26:23273596	C	G	25917.4	4584.98	7.52272e-08	intronic	TRIM8	.
UFO	26:23316810	A	C	27954.2	5160.96	2.31091e-07	intronic	ARL3	.
UFO	26:23319806	A	C	26314.6	4952.19	3.73088e-07	intronic	ARL3	.
UFO	26:23366194	T	C	23268.2	4460.07	5.82566e-07	intronic	WBP1L	.
UFO	26:23520837	C	T	29931.4	5334.74	9.20481e-08	downstream	AS3MT	.
UFO	26:23535680	A	G	27542	5163.49	3.39608e-07	intergenic	AS3MT,CNNM2	dist\x3d15795\x3bdist\x3d14982
UFO	26:23598723	T	C	18912.8	3700.33	9.4312e-07	intronic	CNNM2	.
UFO	26:24592512	T	C	29171.7	5599.53	6.02433e-07	intronic	COL17A1	.
UFO	26:24595417	A	G	23342.9	4388.8	3.64527e-07	intronic	COL17A1	.
UFO	26:24604518	A	G	26507.9	5136.86	7.54466e-07	intronic	COL17A1	.
UFO	26:24604639	*	A	27089.5	5130.21	4.3529e-07	intronic	COL17A1	.
UFO	26:24604640	*	G	27089.5	5130.21	4.3529e-07	intronic	COL17A1	.
UFO	26:24606877	T	C	26796.4	5253.13	9.87058e-07	intronic	COL17A1	.
UFO	26:24606950	A	G	25638.4	4937.97	6.52808e-07	exonic	COL17A1	.
UFO	26:24616349	G	C	25519.3	4993.19	9.4441e-07	intronic	COL17A1	.
UFO	26:24664866	C	A	28665.7	4795.62	1.53478e-08	intergenic	COL17A1,SFR1	dist\x3d26603\x3bdist\x3d21732
UFO	26:25191529	T	C	27209	5147.58	4.24561e-07	intergenic	MIR2393,SORCS3	dist\x3d96078\x3bdist\x3d11594
UFO	26:25209683	G	A	26235.9	4924.88	3.50469e-07	intronic	SORCS3	.
UFO	26:25225333	T	C	31095.3	5924.89	5.04708e-07	intronic	SORCS3	.
UFO	26:25345512	T	C	27762.2	5376.03	7.41724e-07	intronic	SORCS3	.
UFO	26:26009429	T	C	28411.4	5375.19	4.24816e-07	intronic	SORCS3	.
UFO	26:30399645	T	C	30109.2	5591.16	2.6759e-07	intergenic	MIR2285K-4,XPNPEP1	dist\x3d1233105\x3bdist\x3d30819
UFO	26:32829690	T	C	28641	5226.91	1.71761e-07	intronic	TECTB	.
UFO	26:33344446	A	C	30703.1	5562.51	1.42056e-07	intronic	VTI1A	.
UFO	26:39093990	A	C	31967.5	5570.08	4.95244e-08	intergenic	CACUL1,TRNAG-CCC	dist\x3d76594\x3bdist\x3d4720
UFO	26:40469843	A	C	25402.3	4810.28	4.34353e-07	intergenic	SEC23IP,PLPP4	dist\x3d428658\x3bdist\x3d39886
UFO	26:44804169	T	C	29403.5	4975.95	2.1537e-08	intergenic	CTBP2,TEX36	dist\x3d89695\x3bdist\x3d401340
UFO	27:18415227	T	C	26664.6	4756.81	9.43242e-08	intergenic	TRIML1,FRG1	dist\x3d742279\x3bdist\x3d763227
UFO	27:18415454	T	C	23209.5	4486.41	7.11299e-07	intergenic	TRIML1,FRG1	dist\x3d742506\x3bdist\x3d763000
UFO	27:18426123	T	G	24961.1	4806.01	6.47933e-07	intergenic	TRIML1,FRG1	dist\x3d753175\x3bdist\x3d752331
UFO	27:18426255	G	C	28176.5	5276.41	3.30111e-07	intergenic	TRIML1,FRG1	dist\x3d753307\x3bdist\x3d752199
UFO	27:44778358	A	C	25153.6	4900.91	8.56362e-07	intergenic	TRNAW-CCA,TRNAG-GCC	dist\x3d248447\x3bdist\x3d1254
UFO	28:34667	G	T	28448	5283.04	2.68047e-07	intergenic	NONE,OR5D14	dist\x3dNONE\x3bdist\x3d19994
UFO	28:38817	T	C	30012.3	5479.95	1.74026e-07	intergenic	NONE,OR5D14	dist\x3dNONE\x3bdist\x3d15844
UFO	28:38818	A	C	30012.3	5479.95	1.74026e-07	intergenic	NONE,OR5D14	dist\x3dNONE\x3bdist\x3d15843
UFO	28:10064625	T	C	23935.7	4514.92	3.94847e-07	intronic	RYR2	.
UFO	28:17796044	G	A	26699.2	4837.19	1.42105e-07	intergenic	CABCOCO1,TRNAG-CCC	dist\x3d37459\x3bdist\x3d90753
UFO	28:17796140	A	G	27713.2	5062.68	1.76288e-07	intergenic	CABCOCO1,TRNAG-CCC	dist\x3d37555\x3bdist\x3d90657
UFO	28:18430973	G	T	28374.7	5539.33	8.96156e-07	intronic	RTKN2	.
UFO	28:31732030	T	C	29781.2	5666.34	4.8749e-07	intronic	LRMDA	.
UFO	28:35487273	C	A	37026.4	5722.13	1.24868e-09	UTR5	LOC112444733	XM_024986863.1:c.-1061A>C
UFO	28:41496829	A	G	27940.7	5187.55	2.66399e-07	intronic	BMPR1A	.
UFO	29:23027050	G	T	31297.6	5415.26	4.06887e-08	intergenic	ANO5,NELL1	dist\x3d385136\x3bdist\x3d228742
UFO	29:23621817	T	C	29468.5	5547.27	3.75635e-07	intronic	NELL1	.
UFO	29:23972301	A	G	25803.9	4898.99	4.62578e-07	intronic	NELL1	.
UFO	29:26861838	A	C	27517.3	5263.88	5.54977e-07	intergenic	LOC782329,LOC782288	dist\x3d9421\x3bdist\x3d2299
UFO	29:27525386	G	C	28702.1	5249.8	1.81985e-07	intergenic	LOC526276,LOC616755	dist\x3d8563\x3bdist\x3d4758
UFO	29:27542122	T	C	27604.5	5270.24	5.29557e-07	intergenic	OR8G5,LOC100301297	dist\x3d3894\x3bdist\x3d26993
UFO	29:27543521	G	A	24284.2	4593.48	4.22851e-07	intergenic	OR8G5,LOC100301297	dist\x3d5293\x3bdist\x3d25594
UFO	29:27543531	C	T	26287.5	4685.27	9.20404e-08	intergenic	OR8G5,LOC100301297	dist\x3d5303\x3bdist\x3d25584
UFO	29:27543532	A	G	26287.5	4685.27	9.20404e-08	intergenic	OR8G5,LOC100301297	dist\x3d5304\x3bdist\x3d25583
UFO	29:27570092	C	A	26159.4	5021.76	6.03654e-07	upstream	LOC100301297	.
UFO	29:27575441	T	G	30376.1	5183.19	2.73694e-08	intergenic	LOC100301297,LOC788554	dist\x3d5394\x3bdist\x3d11818
UFO	29:27585937	G	C	33762.7	5104.41	5.89353e-10	intergenic	LOC100301297,LOC788554	dist\x3d15890\x3bdist\x3d1322
UFO	29:27631080	T	C	26288.9	4946.91	3.72275e-07	intergenic	LOC788607,LOC531225	dist\x3d8728\x3bdist\x3d17808
UFO	29:27639927	G	T	29314.6	5263.89	1.12333e-07	intergenic	LOC788607,LOC531225	dist\x3d17575\x3bdist\x3d8961
UFO	29:27715468	T	C	32167.9	5820.66	1.37506e-07	intergenic	LOC782544,LOC511657	dist\x3d4481\x3bdist\x3d12510
UFO	29:27929326	C	T	26157.4	5126.68	9.81854e-07	exonic	LOC513333	.
UFO	29:27930589	T	C	25414.5	4374.21	3.50491e-08	downstream	LOC513333	.
UFO	29:27947271	A	T	23923.8	4664.1	8.68349e-07	intergenic	LOC513334,LOC617016	dist\x3d11658\x3bdist\x3d1810
UFO	29:27983485	T	G	24024.1	4706.92	9.73992e-07	intergenic	LOC508589,LOC515545	dist\x3d2075\x3bdist\x3d21576
UFO	29:28046793	A	G	28825.9	4965.92	3.59726e-08	intergenic	LOC783205,LOC505546	dist\x3d10935\x3bdist\x3d6757
UFO	29:28046801	T	C	27995.4	4954.9	7.61885e-08	intergenic	LOC783205,LOC505546	dist\x3d10943\x3bdist\x3d6749
UFO	29:28413185	C	A	27478.4	5046.32	2.0189e-07	intergenic	HEPACAM,CCDC15	dist\x3d14121\x3bdist\x3d5913
UFO	29:28417866	A	G	26212.3	4975.5	4.6028e-07	intergenic	HEPACAM,CCDC15	dist\x3d18802\x3bdist\x3d1232
UFO	29:28594465	T	C	27390.4	5293.7	7.08497e-07	intergenic	TMEM218,PKNOX2	dist\x3d45557\x3bdist\x3d2175
UFO	29:39658875	T	C	27228	5013.36	2.15795e-07	intergenic	LOC617765,LOC521902	dist\x3d31002\x3bdist\x3d5364
UFO	29:39659461	C	T	28446	5094.81	1.04903e-07	intergenic	LOC617765,LOC521902	dist\x3d31588\x3bdist\x3d4778
UFO	29:39659878	A	G	26837.7	5215.71	8.06946e-07	intergenic	LOC617765,LOC521902	dist\x3d32005\x3bdist\x3d4361
UFO	29:39660159	G	A	23511.2	4559.46	7.6744e-07	intergenic	LOC617765,LOC521902	dist\x3d32286\x3bdist\x3d4080
UFO	29:39660344	C	A	26263.4	4980.57	4.50005e-07	intergenic	LOC617765,LOC521902	dist\x3d32471\x3bdist\x3d3895
UFO	29:39664520	C	A	27653.1	4950.85	1.03809e-07	intronic	LOC521902	.
UFO	29:43641511	C	A	31088.4	5715.51	2.07608e-07	intergenic	FRMD8,SCYL1	dist\x3d38183\x3bdist\x3d63011
UFO	29:46989889	C	T	27165.6	5209.82	5.89735e-07	intergenic	FGF19,FGF4	dist\x3d36990\x3bdist\x3d12092
UFO	29:47717392	T	C	28546.5	5380.46	3.87418e-07	intronic	SHANK2	.
UFO	29:49317947	G	A	23751.9	4606.39	7.6845e-07	intergenic	ASCL2,TH	dist\x3d4255\x3bdist\x3d65394
UFO	29:49365430	C	T	31861.3	5660.17	8.428e-08	intergenic	ASCL2,TH	dist\x3d51738\x3bdist\x3d17911
VFO	1:630083	G	A	17504.8	3198.29	1.7699e-07	intergenic	LOC618212,CLIC6	dist\x3d22897\x3bdist\x3d133954
VFO	1:630086	A	G	16749.2	3106.68	2.59968e-07	intergenic	LOC618212,CLIC6	dist\x3d22900\x3bdist\x3d133951
VFO	1:112529413	G	A	10269.2	1942.9	4.2508e-07	intronic	MME	.
VFO	1:137332683	A	G	11569.1	2128.59	2.11747e-07	intergenic	ACPP,TRNAC-ACA	dist\x3d38244\x3bdist\x3d263260
VFO	1:147127854	T	C	9890.36	1805.33	1.72663e-07	intronic	RUNX1	.
VFO	1:147379983	C	T	10740.6	1938.17	1.27978e-07	intergenic	RUNX1,SETD4	dist\x3d135254\x3bdist\x3d936052
VFO	1:156934066	T	C	8994.06	1696.04	3.92109e-07	intergenic	KCNH8,EFHB	dist\x3d90127\x3bdist\x3d190971
VFO	2:7542981	C	T	9883.6	1909.54	7.02843e-07	intergenic	COL3A1,DIRC1	dist\x3d128069\x3bdist\x3d138808
VFO	2:12304166	A	G	8278.3	1589.88	6.10177e-07	intergenic	ZNF804A,TRNAC-GCA	dist\x3d384444\x3bdist\x3d1087101
VFO	2:12361232	C	G	8404.56	1521.48	1.39184e-07	intergenic	ZNF804A,TRNAC-GCA	dist\x3d441510\x3bdist\x3d1030035
VFO	2:122315535	C	T	9833.64	1883.82	5.7442e-07	intronic	ZCCHC17	.
VFO	2:126560627	C	T	8814.04	1690.67	5.92386e-07	intergenic	ARID1A,RPS6KA1	dist\x3d83549\x3bdist\x3d14275
VFO	2:131541342	A	G	9014.58	1718.08	5.07892e-07	intronic	EIF4G3	.
VFO	2:131957270	T	G	9995.58	1958.02	9.69759e-07	intronic	KIF17	.
VFO	2:133689862	A	G	10058.9	1897.75	3.96804e-07	intergenic	UBR4,IFFO2	dist\x3d100357\x3bdist\x3d15800
VFO	2:134118064	A	G	8890.21	1681.93	4.24704e-07	intergenic	LOC536229,KLHDC7A	dist\x3d88335\x3bdist\x3d66274
VFO	2:134118122	A	G	9528.4	1642.04	3.63175e-08	intergenic	LOC536229,KLHDC7A	dist\x3d88393\x3bdist\x3d66216
VFO	2:134129732	G	A	9235.12	1784.31	7.03375e-07	intergenic	LOC536229,KLHDC7A	dist\x3d100003\x3bdist\x3d54606
VFO	2:134183876	T	C	10041.2	1677.87	1.48224e-08	downstream	KLHDC7A	.
VFO	2:134413845	T	C	9399.3	1670.65	8.54609e-08	intronic	IGSF21	.
VFO	2:134483187	T	C	8674.4	1671.65	6.61698e-07	intronic	IGSF21	.
VFO	2:135390268	T	C	7944.12	1550.83	8.95829e-07	intronic	PADI1	.
VFO	3:26369043	C	T	9963.7	1757.1	6.90229e-08	intergenic	PTGFRN,CD2	dist\x3d37596\x3bdist\x3d99462
VFO	3:26373772	A	G	9539.88	1764.65	2.42601e-07	intergenic	PTGFRN,CD2	dist\x3d42325\x3bdist\x3d94733
VFO	3:37893345	C	G	8185.52	1601.99	9.49639e-07	intergenic	TRNAC-GCA,LOC539383	dist\x3d749600\x3bdist\x3d1849809
VFO	3:39562407	G	T	10854.8	1797.47	1.12965e-08	intergenic	NONE,LOC539383	dist\x3dNONE\x3bdist\x3d180747
VFO	3:39585629	G	T	9418.54	1759.41	3.10545e-07	intergenic	NONE,LOC539383	dist\x3dNONE\x3bdist\x3d157525
VFO	3:40589392	G	A	7472.97	1435.43	6.12354e-07	intergenic	COL11A1,OLFM3	dist\x3d58721\x3bdist\x3d682323
VFO	3:40589624	T	C	7519.86	1416.05	3.78771e-07	intergenic	COL11A1,OLFM3	dist\x3d58953\x3bdist\x3d682091
VFO	3:40589928	T	C	8347.95	1490.74	9.69286e-08	intergenic	COL11A1,OLFM3	dist\x3d59257\x3bdist\x3d681787
VFO	3:40604796	C	A	8895.64	1599.64	1.16687e-07	intergenic	COL11A1,OLFM3	dist\x3d74125\x3bdist\x3d666919
VFO	3:52890867	G	A	10601.9	1891.88	9.50932e-08	intergenic	BARHL2,TRNAC-GCA	dist\x3d354172\x3bdist\x3d61781
VFO	3:52890889	T	G	9750.94	1799.36	2.28257e-07	intergenic	BARHL2,TRNAC-GCA	dist\x3d354194\x3bdist\x3d61759
VFO	3:54132362	G	A	10204.1	1967.62	6.71238e-07	intergenic	GBP5,LOC512486	dist\x3d20774\x3bdist\x3d16597
VFO	3:54132369	T	G	10258.6	1964.11	5.66623e-07	intergenic	GBP5,LOC512486	dist\x3d20781\x3bdist\x3d16590
VFO	4:712497	A	G	9937.41	1851.42	2.90652e-07	intergenic	VSTM2A,TRNAC-ACA	dist\x3d105236\x3bdist\x3d223692
VFO	4:4671645	C	G	9637.32	1796.4	2.94274e-07	intronic	COBL	.
VFO	4:6209185	T	C	9827.92	1861.38	4.36215e-07	intergenic	VWC2,ABCA13	dist\x3d81666\x3bdist\x3d994797
VFO	4:7075259	T	C	9802.17	1816.42	2.53858e-07	intergenic	VWC2,ABCA13	dist\x3d947740\x3bdist\x3d128723
VFO	4:7904427	T	G	9656.28	1875.43	7.94934e-07	intergenic	CLDN12,CDK14	dist\x3d130737\x3bdist\x3d33717
VFO	4:8019707	G	A	10622.4	1847.01	4.67291e-08	intronic	CDK14	.
VFO	4:8399451	A	G	10644.7	1940.55	1.6705e-07	intronic	CDK14	.
VFO	4:8399469	T	C	10503.2	1938.82	2.30212e-07	intronic	CDK14	.
VFO	4:65577759	*	A	9923.17	1681.57	2.24047e-08	intronic	MINDY4	.
VFO	4:65616683	A	G	11253.8	1948.45	4.14422e-08	intergenic	INMT,CRHR2	dist\x3d8646\x3bdist\x3d31247
VFO	4:90458130	T	C	9737.35	1709.31	6.08509e-08	intergenic	TRNAR-ACG,GRM8	dist\x3d289232\x3bdist\x3d212980
VFO	5:69378967	C	T	8103.1	1478.2	1.69977e-07	intergenic	C5H12orf75,NUAK1	dist\x3d463997\x3bdist\x3d97236
VFO	5:75946478	A	G	8273.94	1604.22	7.63929e-07	intergenic	CARD10,USP18	dist\x3d6377\x3bdist\x3d55474
VFO	7:15168671	A	G	9139.08	1739.79	4.93883e-07	intergenic	ILF3,QTRT1	dist\x3d1242\x3bdist\x3d19543
VFO	7:57741416	A	G	9998.95	1829.14	1.82672e-07	intergenic	GPR151,PPP2R2B	dist\x3d37110\x3bdist\x3d54778
VFO	7:95390781	A	G	9418.33	1830.38	8.06914e-07	intergenic	ELL2,PCSK1	dist\x3d104217\x3bdist\x3d355522
VFO	7:101175878	A	G	9649.88	1787.52	2.51446e-07	intergenic	ST8SIA4,TRNAE-UUC	dist\x3d1038721\x3bdist\x3d89802
VFO	7:101175908	G	A	9008.58	1707.99	4.47496e-07	intergenic	ST8SIA4,TRNAE-UUC	dist\x3d1038751\x3bdist\x3d89772
VFO	7:102075225	G	A	8553.11	1645.78	6.38379e-07	intronic	PAM	.
VFO	7:110437297	*	G	9580.64	1864.84	8.36903e-07	intronic	CAMK4	.
VFO	7:110480733	G	A	11768.1	1841.33	1.88594e-09	intronic	CAMK4	.
VFO	8:34700252	A	G	10035.4	1701.37	2.27084e-08	intergenic	NONE,PTPRD	dist\x3dNONE\x3bdist\x3d1328395
VFO	8:36811418	A	G	10536	1829.85	4.52261e-08	intergenic	PTPRD,DMAC1	dist\x3d207672\x3bdist\x3d283877
VFO	8:37104872	T	A	9546.87	1835.64	6.27268e-07	intergenic	DMAC1,TRNAC-GCA	dist\x3d7511\x3bdist\x3d618830
VFO	8:38699456	G	A	9846.22	1852.43	3.70384e-07	intronic	KIAA2026	.
VFO	8:39685895	T	C	8564.76	1679.94	9.99521e-07	intronic	RCL1	.
VFO	8:39704383	G	A	10398.3	1942.9	3.12381e-07	intronic	RCL1	.
VFO	8:39721091	C	T	9233.32	1749.49	4.40666e-07	intronic	RCL1	.
VFO	8:42667894	C	T	9690.19	1809.38	3.07239e-07	intergenic	SMARCA2,TRNAE-UUC	dist\x3d118360\x3bdist\x3d108738
VFO	8:42797692	T	C	9697.5	1835.44	4.29095e-07	intergenic	TRNAE-UUC,TRNAC-GCA	dist\x3d20989\x3bdist\x3d5792
VFO	8:43812387	G	A	10054	1964.24	9.12039e-07	intronic	KANK1	.
VFO	8:65268874	T	C	8219.82	1568.81	5.25383e-07	exonic	INVS	.
VFO	8:67490304	G	A	8847.23	1713.01	7.39503e-07	intergenic	LZTS1,TRNAC-GCA	dist\x3d61425\x3bdist\x3d369214
VFO	8:67490395	T	C	9007.51	1721.97	5.46536e-07	intergenic	LZTS1,TRNAC-GCA	dist\x3d61516\x3bdist\x3d369123
VFO	8:67492485	C	T	10233.4	1886.67	2.23015e-07	intergenic	LZTS1,TRNAC-GCA	dist\x3d63606\x3bdist\x3d367033
VFO	8:67492490	A	G	10233.4	1886.67	2.23015e-07	intergenic	LZTS1,TRNAC-GCA	dist\x3d63611\x3bdist\x3d367028
VFO	8:67492496	A	G	10762.5	1900.92	7.20125e-08	intergenic	LZTS1,TRNAC-GCA	dist\x3d63617\x3bdist\x3d367022
VFO	8:67492507	T	C	9998.76	1769.77	7.62965e-08	intergenic	LZTS1,TRNAC-GCA	dist\x3d63628\x3bdist\x3d367011
VFO	8:67492520	C	A	9717.22	1849.76	4.93267e-07	intergenic	LZTS1,TRNAC-GCA	dist\x3d63641\x3bdist\x3d366998
VFO	9:6047309	C	G	8630.76	1672.9	7.58469e-07	intergenic	NONE,ADGRB3	dist\x3dNONE\x3bdist\x3d1313212
VFO	9:18511014	T	C	10198	1884.63	2.36936e-07	intergenic	IRAK1BP1,PHIP	dist\x3d28011\x3bdist\x3d7390
VFO	9:20575932	G	A	8686.86	1655.65	5.08135e-07	intergenic	BCKDHB,FAM46A	dist\x3d501177\x3bdist\x3d921885
VFO	9:32898390	C	G	9920.35	1924.55	7.74309e-07	intronic	SLC35F1	.
VFO	9:32898404	G	A	10176.1	1934.67	4.78436e-07	intronic	SLC35F1	.
VFO	9:32910560	A	G	9684.01	1736.48	1.08224e-07	intronic	SLC35F1	.
VFO	9:33530995	A	G	9295.61	1753.04	3.92879e-07	intergenic	VGLL2,RFX6	dist\x3d23699\x3bdist\x3d188320
VFO	9:35712731	C	T	11012.2	1952.93	8.04231e-08	intergenic	FRK,HS3ST5	dist\x3d1019278\x3bdist\x3d368396
VFO	9:35918440	C	T	8654.14	1563.21	1.31361e-07	intergenic	FRK,HS3ST5	dist\x3d1224987\x3bdist\x3d162687
VFO	9:37308510	*	A	8989.52	1706.72	4.62742e-07	intergenic	MIR2479,LAMA4	dist\x3d266535\x3bdist\x3d867572
VFO	9:37308511	*	A	8989.52	1706.72	4.62742e-07	intergenic	MIR2479,LAMA4	dist\x3d266536\x3bdist\x3d867571
VFO	9:37342800	T	C	9632.54	1676.98	4.83772e-08	intergenic	MIR2479,LAMA4	dist\x3d300825\x3bdist\x3d833282
VFO	9:37424376	G	T	9779.77	1858.17	4.71339e-07	intergenic	MIR2479,LAMA4	dist\x3d382401\x3bdist\x3d751706
VFO	9:46287354	T	C	9888	1845.12	3.02326e-07	intergenic	TRNAM-CAU,GRIK2	dist\x3d99338\x3bdist\x3d1600345
VFO	9:97417563	G	A	8490.65	1607.92	4.34977e-07	intronic	PRKN	.
VFO	9:98287597	C	T	8583.19	1677.9	9.24935e-07	intergenic	PACRG,QKI	dist\x3d29290\x3bdist\x3d533062
VFO	9:99958823	C	T	10178	1958.48	6.38656e-07	intergenic	TRNAC-GCA,C9H6orf118	dist\x3d303001\x3bdist\x3d465327
VFO	9:100017994	C	T	9957.25	1925.9	7.21439e-07	intergenic	TRNAC-GCA,C9H6orf118	dist\x3d362172\x3bdist\x3d406156
VFO	9:104428080	A	G	8473.3	1652.43	8.74599e-07	intergenic	LOC100301231,TRNAY-GUA	dist\x3d4752\x3bdist\x3d44012
VFO	9:104428207	T	C	8814.63	1680.15	5.09193e-07	intergenic	LOC100301231,TRNAY-GUA	dist\x3d4879\x3bdist\x3d43885
VFO	10:26364037	A	G	9350.64	1613.96	3.79851e-08	intergenic	RNASE1,RNASE6	dist\x3d6446\x3bdist\x3d6293
VFO	10:27707866	T	C	9573.17	1863.31	8.36018e-07	intergenic	LOC781713,LOC100300401	dist\x3d28694\x3bdist\x3d23336
VFO	10:28480955	T	C	9654.95	1886.64	9.16084e-07	intergenic	KATNBL1,EMC7	dist\x3d29406\x3bdist\x3d9850
VFO	10:29059085	G	A	7180.68	1399.67	8.64822e-07	intronic	RYR3	.
VFO	10:34637209	T	A	7528.42	1449.21	6.44644e-07	intergenic	RASGRP1,THBS1	dist\x3d360704\x3bdist\x3d572339
VFO	11:5473340	C	T	9129.4	1730.9	4.47562e-07	intronic	LONRF2	.
VFO	11:5521683	A	C	10601.6	1919.33	1.39423e-07	intronic	CHST10	.
VFO	11:5530835	A	G	6675.54	1277.74	5.62859e-07	intergenic	CHST10,NMS	dist\x3d8140\x3bdist\x3d6622
VFO	11:25473824	C	A	11604.7	1978.7	2.67953e-08	intergenic	TRNAI-UAU,ZFP36L2	dist\x3d333258\x3bdist\x3d32708
VFO	11:45814885	G	A	9360.93	1644.87	6.25359e-08	intergenic	UXS1,C11H2orf40	dist\x3d36322\x3bdist\x3d14130
VFO	11:56300198	G	A	10623.7	1989.54	3.30624e-07	intergenic	CTNNA2,LOC107132934	dist\x3d139928\x3bdist\x3d272335
VFO	11:60930254	C	G	9988.48	1756.09	6.34792e-08	intergenic	B3GNT2,TMEM17	dist\x3d173713\x3bdist\x3d73485
VFO	11:90642482	T	A	8664.79	1653.02	5.19911e-07	intergenic	CMPK2,SOX11	dist\x3d557079\x3bdist\x3d303741
VFO	11:91340309	C	T	10876.4	1765.64	6.143e-09	intergenic	SOX11,TRNAS-ACU	dist\x3d385027\x3bdist\x3d126014
VFO	11:91340336	T	C	10205.3	1768.1	4.22309e-08	intergenic	SOX11,TRNAS-ACU	dist\x3d385054\x3bdist\x3d125987
VFO	11:91696462	G	A	9638.1	1793.02	2.80132e-07	intergenic	TRNAS-ACU,LOC525099	dist\x3d230068\x3bdist\x3d538998
VFO	11:91696526	A	G	9310.99	1695.84	1.63102e-07	intergenic	TRNAS-ACU,LOC525099	dist\x3d230132\x3bdist\x3d538934
VFO	11:91864160	T	G	9922.45	1876.47	4.20598e-07	intergenic	TRNAS-ACU,LOC525099	dist\x3d397766\x3bdist\x3d371300
VFO	11:92068258	A	G	9141.86	1629.6	9.23971e-08	intergenic	TRNAS-ACU,LOC525099	dist\x3d601864\x3bdist\x3d167202
VFO	11:92668451	T	A	10644.1	1933.43	1.52076e-07	intronic	DAB2IP	.
VFO	11:92670821	T	A	11247.7	1877.44	1.4351e-08	intronic	DAB2IP	.
VFO	11:93185097	G	T	9433.68	1595.72	2.12458e-08	intronic	MRRF	.
VFO	11:93765483	A	C	8497.35	1596.46	3.58027e-07	intergenic	OR1B1,OR1L1	dist\x3d3547\x3bdist\x3d25600
VFO	12:6177066	A	G	9627.38	1858.64	6.90502e-07	intergenic	PCDH17,NONE	dist\x3d953080\x3bdist\x3dNONE
VFO	12:6187387	T	G	9480.13	1640.99	4.11735e-08	intergenic	PCDH17,NONE	dist\x3d963401\x3bdist\x3dNONE
VFO	12:13472422	G	A	9599.77	1821.59	4.56653e-07	intronic	ENOX1	.
VFO	12:77117440	T	A	7303.12	1375.5	3.80591e-07	intronic	PCCA	.
VFO	12:78022074	G	A	11046.7	2136.27	7.18613e-07	intronic	ITGBL1	.
VFO	13:3275694	G	A	9065.33	1754.78	7.35039e-07	intronic	ANKEF1	.
VFO	13:30880731	T	C	8321.14	1530.18	2.08869e-07	intergenic	MINDY3,PTER	dist\x3d480845\x3bdist\x3d38372
VFO	13:81496682	G	A	9230.62	1739.77	3.87282e-07	intergenic	BCAS1,CYP24A1	dist\x3d5799\x3bdist\x3d95500
VFO	14:49881702	A	G	8861.08	1728.77	8.83073e-07	intergenic	TRPS1,CSMD3	dist\x3d972703\x3bdist\x3d924079
VFO	14:51425112	T	C	9060.34	1720.91	4.67571e-07	intronic	LOC112449555	.
VFO	14:53891845	A	G	9604.13	1874.33	8.89557e-07	intergenic	TRNAC-ACA,KCNV1	dist\x3d475040\x3bdist\x3d595131
VFO	14:54980148	T	C	9337.45	1816.62	8.27364e-07	intronic	PKHD1L1	.
VFO	14:60613744	G	A	10409.9	1870.02	1.13556e-07	intronic	RIMS2	.
VFO	16:28448121	T	C	9718.29	1864.68	5.96668e-07	intronic	LBR	.
VFO	16:41209445	T	C	10045.2	1940.26	6.98631e-07	intronic	VPS13D	.
VFO	16:56705412	T	C	9368.51	1775.39	4.42383e-07	intronic	TNR	.
VFO	16:56705620	C	T	10709.9	2023.14	4.09309e-07	intronic	TNR	.
VFO	16:65799717	C	G	8919.25	1650.5	2.45049e-07	intergenic	EDEM3,FAM129A	dist\x3d7318\x3bdist\x3d28327
VFO	16:67427880	C	G	8707.53	1705.67	9.69292e-07	intronic	TPR	.
VFO	16:67847182	G	A	8679.22	1661.62	5.65869e-07	intergenic	PTGS2,PLA2G4A	dist\x3d111553\x3bdist\x3d59842
VFO	16:72697905	T	C	9461.51	1828.22	7.04908e-07	intronic	HHAT	.
VFO	16:74254032	T	C	8391.92	1611.68	6.10011e-07	intergenic	MIR205,TRNAW-CCA	dist\x3d353257\x3bdist\x3d141320
VFO	17:1205787	T	A	9215.03	1732.82	3.65853e-07	intergenic	CPE,MIR2285J-1	dist\x3d484341\x3bdist\x3d160034
VFO	17:2458657	T	C	10097.5	1803.18	9.69544e-08	intergenic	NPY2R,RBM46	dist\x3d365572\x3bdist\x3d82031
VFO	17:5116684	G	A	9661.36	1892.61	9.70508e-07	intergenic	TRNAY-GUA,FBXW7	dist\x3d20451\x3bdist\x3d139298
VFO	17:7910576	T	C	9906.27	1726.41	4.97791e-08	intergenic	TRNAE-UUC,IQCM	dist\x3d116042\x3bdist\x3d132841
VFO	17:10863507	T	C	8330.09	1624.14	8.70114e-07	intergenic	EDNRA,TTC29	dist\x3d193649\x3bdist\x3d466905
VFO	17:42125852	T	C	10180	1982.9	8.50722e-07	intergenic	GLRB,PDGFC	dist\x3d15457\x3bdist\x3d100411
VFO	18:11485588	A	G	10039.6	1963	9.29149e-07	intronic	GSE1	.
VFO	18:46585024	C	T	9306.47	1805.8	7.77742e-07	intronic	NFKBID	.
VFO	18:46586446	G	A	11044.6	1743.9	2.54009e-09	intronic	NFKBID	.
VFO	18:46960907	*	G	8162.87	1528.19	3.27908e-07	intronic	ZNF382	.
VFO	18:47163891	A	G	8093.11	1520.66	3.58877e-07	intronic	LOC101907883	.
VFO	18:47166100	T	C	8792.42	1660.72	4.08075e-07	intronic	LOC101907883	.
VFO	18:51919583	C	T	8833.49	1723.43	8.83522e-07	intergenic	LOC526915,IRGC	dist\x3d8752\x3bdist\x3d4063
VFO	18:52493964	C	T	8747.99	1706.03	8.74956e-07	intergenic	CEACAM16,BCL3	dist\x3d5136\x3bdist\x3d26175
VFO	18:58096897	A	G	9653.12	1804.24	3.14909e-07	intronic	PPP2R1A	.
VFO	18:62544318	T	C	9090.87	1718.21	4.14637e-07	intronic	KIR2DL5A	.
VFO	19:4856164	G	C	9552.83	1842.21	6.72635e-07	intergenic	LOC100847997,LOC781197	dist\x3d36657\x3bdist\x3d11474
VFO	19:8179339	A	G	9635.41	1827.65	4.52385e-07	intronic	MSI2	.
VFO	20:1738286	T	G	8397.95	1568.18	3.07684e-07	intronic	DOCK2	.
VFO	23:1229821	G	A	8708.59	1693.59	8.19699e-07	intergenic	KHDRBS2,PRIM2	dist\x3d268595\x3bdist\x3d1330723
VFO	23:1271768	*	G	12180.1	1905.17	1.86556e-09	intergenic	KHDRBS2,PRIM2	dist\x3d310542\x3bdist\x3d1288776
VFO	23:1320892	A	T	8886.75	1738.14	9.35981e-07	intergenic	KHDRBS2,PRIM2	dist\x3d359666\x3bdist\x3d1239652
VFO	23:1571435	C	T	10012.9	1617.67	5.28554e-09	intergenic	KHDRBS2,PRIM2	dist\x3d610209\x3bdist\x3d989109
VFO	23:36433526	C	A	9577.52	1821.82	4.84554e-07	intergenic	MIR2284C,SOX4	dist\x3d560035\x3bdist\x3d84409
VFO	23:39455472	C	T	8656.57	1678.56	7.65463e-07	downstream	TPMT	.
VFO	23:39455537	A	G	9527.04	1759.86	2.34335e-07	downstream	TPMT	.
VFO	23:44137210	G	C	8867.31	1629.94	2.06671e-07	intergenic	PHACTR1,EDN1	dist\x3d340384\x3bdist\x3d19230
VFO	23:45750673	T	A	9432.41	1824.51	7.22596e-07	intergenic	TFAP2A,OFCC1	dist\x3d112879\x3bdist\x3d249515
VFO	23:45750674	T	A	9432.41	1824.51	7.22596e-07	intergenic	TFAP2A,OFCC1	dist\x3d112880\x3bdist\x3d249514
VFO	23:46433646	C	A	9051.8	1665.94	2.13413e-07	intergenic	OFCC1,SLC35B3	dist\x3d207388\x3bdist\x3d724684
VFO	23:46524483	C	G	10770	1965.33	1.71393e-07	intergenic	OFCC1,SLC35B3	dist\x3d298225\x3bdist\x3d633847
VFO	23:47254437	T	C	9133.58	1723.27	3.97293e-07	intergenic	TRNAQ-CUG,EEF1E1	dist\x3d11370\x3bdist\x3d112825
VFO	24:4013051	C	A	10359.5	1903.29	2.04077e-07	intronic	CNDP2	.
VFO	24:14510502	G	T	10040.9	1736.02	3.98357e-08	intergenic	LOC112444152,TRNAC-GCA	dist\x3d188876\x3bdist\x3d276197
VFO	24:14511802	G	A	9992.49	1799.5	1.21277e-07	intergenic	LOC112444152,TRNAC-GCA	dist\x3d190176\x3bdist\x3d274897
VFO	26:20792040	A	G	9793.24	1879.87	6.02819e-07	intronic	ABCC2	.
VFO	26:23061815	T	C	10237.6	1852.96	1.38482e-07	intergenic	MIR146B,MFSD13A	dist\x3d4105\x3bdist\x3d10222
VFO	26:23356785	C	G	9330.54	1794.85	6.33993e-07	intronic	WBP1L	.
VFO	26:23382676	T	C	9990.45	1771.6	8.02593e-08	intronic	WBP1L	.
VFO	26:23382677	G	A	9573.28	1766.13	2.26793e-07	intronic	WBP1L	.
VFO	26:24374449	C	T	8642.13	1693.42	9.76766e-07	intronic	SH3PXD2A	.
VFO	26:25210690	T	C	11180.1	1702	7.48552e-10	intronic	SORCS3	.
VFO	26:25225333	T	C	12071.3	2020.46	1.55727e-08	intronic	SORCS3	.
VFO	26:27030551	A	C	10074.9	1796.7	9.34751e-08	intergenic	TRNAA-AGC,SORCS1	dist\x3d546041\x3bdist\x3d524326
VFO	26:27701343	A	G	7265.68	1353.31	2.8881e-07	intronic	SORCS1	.
VFO	26:27701372	A	C	7264.18	1386.66	5.27559e-07	intronic	SORCS1	.
VFO	26:27703914	C	T	8922.43	1566.21	6.07979e-08	intronic	SORCS1	.
VFO	26:27703998	T	C	7651.56	1499.68	9.82251e-07	intronic	SORCS1	.
VFO	26:27704024	G	A	8199.17	1524.38	2.75813e-07	intronic	SORCS1	.
VFO	26:27704109	G	A	9645.98	1643.69	2.63158e-08	intronic	SORCS1	.
VFO	26:27704139	G	A	8034.82	1554.71	7.28442e-07	intronic	SORCS1	.
VFO	26:27705821	C	T	7939.23	1484.17	3.16317e-07	intronic	SORCS1	.
VFO	26:38638006	C	T	8080.72	1575.83	8.74114e-07	intergenic	FAM204A,PRLHR	dist\x3d26076\x3bdist\x3d240586
VFO	28:35080586	G	A	10285.1	1701.41	1.09543e-08	intergenic	ZCCHC24,ANXA11	dist\x3d30026\x3bdist\x3d38594
VFO	29:23027050	G	T	12060.8	1829.54	6.62043e-10	intergenic	ANO5,NELL1	dist\x3d385136\x3bdist\x3d228742
VFO	29:39657903	C	T	9655.83	1819.37	3.84474e-07	intergenic	LOC617765,LOC521902	dist\x3d30030\x3bdist\x3d6336
VFO	29:39659461	C	T	9188.87	1801.59	9.89765e-07	intergenic	LOC617765,LOC521902	dist\x3d31588\x3bdist\x3d4778
VFO	29:39659878	A	G	10050.1	1793.96	9.58557e-08	intergenic	LOC617765,LOC521902	dist\x3d32005\x3bdist\x3d4361
VFO	29:39659914	A	G	9246.04	1754.15	4.54611e-07	intergenic	LOC617765,LOC521902	dist\x3d32041\x3bdist\x3d4325
VFO	29:46831613	G	A	10111.5	1943.35	6.20665e-07	intergenic	TRNAR-CCU,ORAOV1	dist\x3d10220\x3bdist\x3d18281
VFO	29:47707586	A	G	9584.67	1744.04	1.59134e-07	intronic	SHANK2	.
VFO	29:47708707	C	T	8966.24	1729.21	6.73739e-07	intronic	SHANK2	.
VFO	29:47712793	A	T	9369.78	1780.91	4.75441e-07	intronic	SHANK2	.
VFO	29:47717392	T	C	10793.3	1845.1	2.88623e-08	intronic	SHANK2	.
VFO	29:47717634	G	A	12303.2	2096.78	2.64232e-08	intronic	SHANK2	.
VFO	29:48481356	T	C	8740.21	1624.75	2.7484e-07	intronic	OSBPL5	.
VFO	29:48711887	A	G	9085.94	1770.99	8.64155e-07	intronic	SLC22A18	.
VFO	29:50579605	C	A	7408.72	1359.22	1.96744e-07	intergenic	CEND1,GATD1	dist\x3d1425\x3bdist\x3d4985
LFO	1:572893	G	A	-38516.9	7488.16	8.13671e-07	intronic	LOC618212	.
LFO	1:112529413	G	A	22299.9	4047.81	1.49331e-07	intronic	MME	.
LFO	1:139001064	G	A	21251.3	3873.5	1.66328e-07	intronic	ATP2C1	.
LFO	1:139001065	A	G	21251.3	3873.5	1.66328e-07	intronic	ATP2C1	.
LFO	1:147127854	T	C	20324	3813.8	3.4745e-07	intronic	RUNX1	.
LFO	1:152598631	G	A	13746.4	2516.82	1.86741e-07	downstream	HACL1	.
LFO	1:152600842	T	C	14680.5	2733.67	2.86872e-07	intronic	HACL1	.
LFO	1:152619188	C	T	15817.9	2689.57	2.47156e-08	intronic	HACL1	.
LFO	1:156934066	T	C	18445.1	3570.06	7.33194e-07	intergenic	KCNH8,EFHB	dist\x3d90127\x3bdist\x3d190971
LFO	2:1677075	T	C	22305.3	3931.34	6.79711e-08	intergenic	AMER3,ARHGEF4	dist\x3d200060\x3bdist\x3d38924
LFO	2:17198573	C	T	17395.6	3183.15	1.84022e-07	intronic	ZNF385B	.
LFO	2:28779911	T	C	17869.7	3484.75	8.73837e-07	intronic	B3GALT1	.
LFO	2:99134812	A	G	18522.8	3552.83	5.91846e-07	intergenic	CPS1,TRNAC-GCA	dist\x3d667132\x3bdist\x3d75786
LFO	2:99134813	A	C	18522.8	3552.83	5.91846e-07	intergenic	CPS1,TRNAC-GCA	dist\x3d667133\x3bdist\x3d75785
LFO	2:99134847	C	G	20894.3	3696.08	7.50751e-08	intergenic	CPS1,TRNAC-GCA	dist\x3d667167\x3bdist\x3d75751
LFO	2:131957270	T	G	22563.1	4028.44	9.64302e-08	intronic	KIF17	.
LFO	2:134183876	T	C	19336	3564.13	2.21868e-07	downstream	KLHDC7A	.
LFO	2:135912788	T	C	22415.1	3957.52	7.12581e-08	intergenic	ARHGEF19,EPHA2	dist\x3d1568\x3bdist\x3d32429
LFO	3:965127	G	A	18969	3712.2	9.48267e-07	intronic	MPZL1	.
LFO	3:31982092	A	G	18499.7	3548.74	5.93213e-07	intronic	LOC100138271	.
LFO	3:34068354	A	G	18723.2	3572.89	5.23374e-07	intronic	SORT1	.
LFO	3:34289704	T	C	16245.4	3037.44	3.17629e-07	intronic	TMEM167B	.
LFO	3:35863644	A	G	19029.8	3589.3	3.9425e-07	intronic	NTNG1	.
LFO	3:39562407	G	T	24270	3711.77	8.76504e-10	intergenic	NONE,LOC539383	dist\x3dNONE\x3bdist\x3d180747
LFO	3:39566800	T	C	22800.2	3840.21	1.87414e-08	intergenic	NONE,LOC539383	dist\x3dNONE\x3bdist\x3d176354
LFO	3:39585629	G	T	20671.4	3637.39	6.49848e-08	intergenic	NONE,LOC539383	dist\x3dNONE\x3bdist\x3d157525
LFO	3:40589624	T	C	15494.6	2974.98	6.06192e-07	intergenic	COL11A1,OLFM3	dist\x3d58953\x3bdist\x3d682091
LFO	3:42806425	A	G	16838.4	3218.54	5.44629e-07	intronic	CDC14A	.
LFO	3:42807111	C	T	16054.9	2962.12	2.27251e-07	intronic	CDC14A	.
LFO	3:42821620	C	T	19485.2	3405.22	5.37819e-08	intronic	CDC14A	.
LFO	3:42859310	C	T	19732.2	3609.77	1.82806e-07	intronic	CDC14A	.
LFO	3:42864300	G	A	16627.1	3247.46	9.05873e-07	intronic	CDC14A	.
LFO	3:44122952	A	T	19341.9	3781.29	9.25988e-07	intergenic	PLPPR4,PLPPR5	dist\x3d146675\x3bdist\x3d95239
LFO	3:44123032	C	A	19700	3566.41	1.39309e-07	intergenic	PLPPR4,PLPPR5	dist\x3d146755\x3bdist\x3d95159
LFO	3:89439515	G	A	20269	3606.01	8.76471e-08	intronic	FYB2	.
LFO	3:97797076	G	A	19842.2	3749.43	4.12423e-07	intronic	SPATA6	.
LFO	3:97824791	A	T	19083.4	3521.3	2.27916e-07	intronic	SPATA6	.
LFO	3:100042715	A	G	19757.8	3819.52	7.12692e-07	intronic	PIK3R3	.
LFO	3:105835869	C	T	21760.6	4085.26	3.51444e-07	intronic	ZMPSTE24	.
LFO	3:111450133	C	T	17999.2	3508.6	8.65771e-07	intergenic	TRNAC-GCA,TRNAC-ACA	dist\x3d91483\x3bdist\x3d44289
LFO	4:1052190	C	G	23318.5	4076.09	5.41302e-08	intergenic	TRNAC-ACA,NONE	dist\x3d115930\x3bdist\x3dNONE
LFO	4:28012392	*	T	17099.9	3325.78	8.21355e-07	intergenic	FERD3L,TWISTNB	dist\x3d156598\x3bdist\x3d387212
LFO	4:65576971	C	A	18578.5	3637.6	9.59268e-07	intronic	MINDY4	.
LFO	4:65577759	*	A	21053.3	3527.66	1.60815e-08	intronic	MINDY4	.
LFO	4:87030632	C	A	21072.7	3830.76	1.55229e-07	intronic	CADPS2	.
LFO	5:41712048	T	G	20626.8	3835.87	2.77517e-07	intergenic	ABCD2,KIF21A	dist\x3d228542\x3bdist\x3d20622
LFO	5:114720064	T	C	20291	3784.69	2.99041e-07	intronic	SAMM50	.
LFO	5:116172483	T	C	20402.4	3941.91	7.03311e-07	intergenic	ATXN10,WNT7B	dist\x3d3088\x3bdist\x3d57822
LFO	6:37932891	G	A	24219.5	3695.23	8.07905e-10	intergenic	LCORL,SLIT2	dist\x3d375746\x3bdist\x3d1846384
LFO	6:40159515	A	G	23637.5	4100.46	4.37604e-08	intronic	SLIT2	.
LFO	6:40197973	G	A	19376	3581.08	2.37492e-07	intergenic	SLIT2,PACRGL	dist\x3d13551\x3bdist\x3d29788
LFO	6:44777570	C	T	21162.7	3569.71	1.95789e-08	intergenic	SEPSECS,PI4K2B	dist\x3d40668\x3bdist\x3d27947
LFO	6:45916479	G	A	20882.9	3999.95	5.72518e-07	intergenic	RBPJ,CCKAR	dist\x3d28496\x3bdist\x3d3157
LFO	6:46665758	T	C	19151.3	3272.84	2.85918e-08	intergenic	STIM2,TRNAS-GGA	dist\x3d209619\x3bdist\x3d1852188
LFO	6:49491435	C	T	21411.7	3774.62	6.83615e-08	intergenic	TRNAS-GGA,PCDH7	dist\x3d973418\x3bdist\x3d462951
LFO	6:106428624	C	A	21149.5	3852.66	1.63802e-07	intergenic	TRNAA-UGC,HS3ST1	dist\x3d354522\x3bdist\x3d74972
LFO	6:116321882	T	C	17466.6	3179.68	1.61033e-07	intronic	ZFYVE28	.
LFO	7:31040044	G	A	17993.2	3437.29	5.37132e-07	intronic	SNX2	.
LFO	8:2215489	A	G	20960.7	3856.77	2.12079e-07	intergenic	LOC520638,GALNTL6	dist\x3d214987\x3bdist\x3d1724603
LFO	8:34700252	A	G	18912.4	3626.56	5.88023e-07	intergenic	NONE,PTPRD	dist\x3dNONE\x3bdist\x3d1328395
LFO	8:42797692	T	C	19690.2	3851.35	9.37001e-07	intergenic	TRNAE-UUC,TRNAC-GCA	dist\x3d20989\x3bdist\x3d5792
LFO	8:63007174	A	G	19910.4	3326.2	1.47152e-08	intergenic	XPA,FOXE1	dist\x3d98432\x3bdist\x3d45299
LFO	8:65268874	T	C	17575.6	3261.35	2.62757e-07	exonic	INVS	.
LFO	8:65286197	A	C	17829.6	3487.68	9.38638e-07	intronic	TEX10	.
LFO	8:67240373	T	C	19685.3	3651.59	2.60526e-07	intronic	SLC18A1	.
LFO	8:67492485	C	T	23731.4	3891.14	8.36417e-09	intergenic	LZTS1,TRNAC-GCA	dist\x3d63606\x3bdist\x3d367033
LFO	8:67492490	A	G	23731.4	3891.14	8.36417e-09	intergenic	LZTS1,TRNAC-GCA	dist\x3d63611\x3bdist\x3d367028
LFO	8:67492496	A	G	24812.6	3905.57	2.29346e-09	intergenic	LZTS1,TRNAC-GCA	dist\x3d63617\x3bdist\x3d367022
LFO	8:67492507	T	C	22848.9	3657.48	3.94602e-09	intergenic	LZTS1,TRNAC-GCA	dist\x3d63628\x3bdist\x3d367011
LFO	8:67492520	C	A	21238.1	3862.59	1.57094e-07	intergenic	LZTS1,TRNAC-GCA	dist\x3d63641\x3bdist\x3d366998
LFO	9:37308510	*	A	19518.6	3546.04	1.52758e-07	intergenic	MIR2479,LAMA4	dist\x3d266535\x3bdist\x3d867572
LFO	9:37308511	*	A	19518.6	3546.04	1.52758e-07	intergenic	MIR2479,LAMA4	dist\x3d266536\x3bdist\x3d867571
LFO	9:37424376	G	T	19997.4	3894.22	8.45851e-07	intergenic	MIR2479,LAMA4	dist\x3d382401\x3bdist\x3d751706
LFO	9:37539929	C	T	13760.2	2640.11	5.9612e-07	intergenic	MIR2479,LAMA4	dist\x3d497954\x3bdist\x3d636153
LFO	9:46289489	T	A	20537.5	3977.61	7.44423e-07	intergenic	TRNAM-CAU,GRIK2	dist\x3d101473\x3bdist\x3d1598210
LFO	9:69966783	A	G	14830	2884.69	8.24002e-07	intronic	LOC101904601	.
LFO	9:83889305	G	A	17504.1	3277.08	3.28166e-07	intergenic	RAB32,ADGB	dist\x3d25214\x3bdist\x3d15784
LFO	9:85239125	T	C	22111.8	4248.72	6.1725e-07	intergenic	SAMD5,SASH1	dist\x3d345538\x3bdist\x3d431154
LFO	9:104428080	A	G	17632.3	3452.28	9.58937e-07	intergenic	LOC100301231,TRNAY-GUA	dist\x3d4752\x3bdist\x3d44012
LFO	10:39926134	T	C	17749.1	3291.05	2.57785e-07	intronic	MDGA2	.
LFO	11:5473340	C	T	20054.9	3578.84	9.51471e-08	intronic	LONRF2	.
LFO	11:5521683	A	C	21597.8	4055.4	3.52962e-07	intronic	CHST10	.
LFO	11:5530835	A	G	13909.2	2672.85	6.18523e-07	intergenic	CHST10,NMS	dist\x3d8140\x3bdist\x3d6622
LFO	11:32089477	C	A	22171.6	4221.6	4.96206e-07	intergenic	FSHR,NRXN1	dist\x3d638940\x3bdist\x3d185922
LFO	11:45814885	G	A	19377.1	3440.72	8.3209e-08	intergenic	UXS1,C11H2orf40	dist\x3d36322\x3bdist\x3d14130
LFO	11:45814903	C	T	19894.6	3646.69	1.92353e-07	intergenic	UXS1,C11H2orf40	dist\x3d36340\x3bdist\x3d14112
LFO	11:51503592	A	G	18246.2	3516.36	6.62229e-07	intergenic	SUCLG1,NONE	dist\x3d952181\x3bdist\x3dNONE
LFO	11:91340309	C	T	19661.4	3799.42	7.06205e-07	intergenic	SOX11,TRNAS-ACU	dist\x3d385027\x3bdist\x3d126014
LFO	11:91340336	T	C	19720.7	3749.03	4.77705e-07	intergenic	SOX11,TRNAS-ACU	dist\x3d385054\x3bdist\x3d125987
LFO	11:92068258	A	G	18943.9	3407.88	1.17902e-07	intergenic	TRNAS-ACU,LOC525099	dist\x3d601864\x3bdist\x3d167202
LFO	11:92670821	T	A	24116	3894.97	5.23526e-09	intronic	DAB2IP	.
LFO	11:92671529	G	C	18991	3618.08	5.03177e-07	intronic	DAB2IP	.
LFO	11:93185097	G	T	18574.6	3373.74	1.51815e-07	intronic	MRRF	.
LFO	11:93765483	A	C	19168.8	3281.39	3.00243e-08	intergenic	OR1B1,OR1L1	dist\x3d3547\x3bdist\x3d25600
LFO	11:106269174	T	C	19620.2	3813.67	8.09977e-07	intronic	NELFB	.
LFO	12:6501718	G	A	18023.5	3416.5	4.45363e-07	intergenic	PCDH17,NONE	dist\x3d1277732\x3bdist\x3dNONE
LFO	12:6632768	G	C	17721.1	3428.01	7.23694e-07	intergenic	PCDH17,NONE	dist\x3d1408782\x3bdist\x3dNONE
LFO	12:7838740	G	C	19429.3	3665.8	3.97265e-07	intergenic	NONE,LOC101905933	dist\x3dNONE\x3bdist\x3d1201896
LFO	12:7838757	A	G	19158.9	3440.62	1.1263e-07	intergenic	NONE,LOC101905933	dist\x3dNONE\x3bdist\x3d1201879
LFO	12:7975727	T	C	21373.5	3797.3	8.44604e-08	intergenic	NONE,LOC101905933	dist\x3dNONE\x3bdist\x3d1064909
LFO	12:8039882	T	C	18718.8	3612.98	6.86739e-07	intergenic	NONE,LOC101905933	dist\x3dNONE\x3bdist\x3d1000754
LFO	12:8092171	G	A	19756.6	3494.34	7.47934e-08	intergenic	NONE,LOC101905933	dist\x3dNONE\x3bdist\x3d948465
LFO	12:8432085	A	G	21643.2	4024.76	2.77325e-07	intergenic	NONE,LOC101905933	dist\x3dNONE\x3bdist\x3d608551
LFO	12:25395101	C	A	18549.5	3583.07	6.99381e-07	intronic	DCLK1	.
LFO	12:27701309	G	T	20318.5	3682.65	1.43615e-07	intronic	STARD13	.
LFO	13:2163950	G	A	25424.6	4010.2	2.45378e-09	intronic	PLCB4	.
LFO	13:2467110	A	G	20436.2	3756.57	2.06799e-07	intronic	PLCB4	.
LFO	13:3235949	A	G	20445	3698.52	1.36612e-07	intergenic	PAK5,ANKEF1	dist\x3d247033\x3bdist\x3d16197
LFO	13:5770971	A	C	18944.3	3663.09	7.1647e-07	intronic	LOC107133022	.
LFO	13:14442183	T	C	22698	3934.42	4.28106e-08	intergenic	CELF2,GATA3	dist\x3d1257320\x3bdist\x3d1463119
LFO	13:15887927	T	C	21887.8	4007.55	1.86878e-07	intergenic	NONE,GATA3	dist\x3dNONE\x3bdist\x3d17375
LFO	13:29923751	A	G	14747.6	2818.54	5.42954e-07	intergenic	FAM171A1,ITGA8	dist\x3d9913\x3bdist\x3d129323
LFO	13:30880731	T	C	18290.7	3161.41	3.94959e-08	intergenic	MINDY3,PTER	dist\x3d480845\x3bdist\x3d38372
LFO	13:36657816	C	T	21158	3697.52	5.37697e-08	intronic	ARMC4	.
LFO	13:36657818	T	A	21158	3697.52	5.37697e-08	intronic	ARMC4	.
LFO	13:41496819	C	A	19743.2	3773.58	5.43939e-07	intergenic	PAX1,FOXA2	dist\x3d586672\x3bdist\x3d45742
LFO	13:44797972	A	G	20186.1	3867.99	5.77847e-07	intergenic	KLF6,LOC112449302	dist\x3d191927\x3bdist\x3d21960
LFO	13:46941224	T	C	22366.5	3540.29	2.75133e-09	intergenic	ZMYND11,PRNP	dist\x3d28604\x3bdist\x3d98713
LFO	13:47112446	A	G	18947.4	3587.45	4.32883e-07	intergenic	PRND,RASSF2	dist\x3d21401\x3bdist\x3d18682
LFO	13:73454864	T	C	23096.2	4048.22	5.8364e-08	intronic	STK4	.
LFO	13:75314877	A	G	19320.8	3646.67	4.0087e-07	intronic	SLC13A3	.
LFO	13:75330946	A	G	23403.6	4408.33	3.81439e-07	intronic	SLC13A3	.
LFO	14:27882704	A	C	21395.5	4053.28	4.38912e-07	intronic	NKAIN3	.
LFO	14:28612358	A	T	19873.5	3695.28	2.76561e-07	intergenic	YTHDF3,MIR124A-2	dist\x3d437787\x3bdist\x3d511998
LFO	14:47219872	C	T	19515.3	3601.78	2.29191e-07	intergenic	SLC30A8,AARD	dist\x3d69326\x3bdist\x3d118637
LFO	14:49009759	C	T	16029.4	3093.35	6.83952e-07	intergenic	TRPS1,CSMD3	dist\x3d100760\x3bdist\x3d1796022
LFO	14:50477166	G	T	20650.9	3972.01	6.32238e-07	intergenic	TRPS1,CSMD3	dist\x3d1568167\x3bdist\x3d328615
LFO	14:50502032	A	C	21785.5	3808.04	5.4107e-08	intergenic	TRPS1,CSMD3	dist\x3d1593033\x3bdist\x3d303749
LFO	14:53891845	A	G	20259.5	3906.65	6.71536e-07	intergenic	TRNAC-ACA,KCNV1	dist\x3d475040\x3bdist\x3d595131
LFO	14:54862403	C	T	18130.1	3531.56	8.51314e-07	upstream	EBAG9	.
LFO	14:54980148	T	C	23071.3	3659.64	2.94747e-09	intronic	PKHD1L1	.
LFO	14:74705810	A	T	16255.3	3105.45	5.37796e-07	intronic	MMP16	.
LFO	14:81849683	A	G	21048.7	3842.01	1.72543e-07	intronic	MTBP	.
LFO	14:81867615	A	G	20179.8	3783.48	3.40147e-07	intergenic	MTBP,SNTB1	dist\x3d2907\x3bdist\x3d2947
LFO	14:81875933	A	G	21062.8	4088.95	7.86694e-07	intronic	SNTB1	.
LFO	15:84093055	T	A	19068.5	3731.66	9.48142e-07	intergenic	LOC100271685,OR4A15	dist\x3d159077\x3bdist\x3d62022
LFO	16:1293553	G	A	21615.6	4071.09	3.80398e-07	intergenic	OPTC,ATP2B4	dist\x3d27062\x3bdist\x3d104623
LFO	16:31568420	G	A	22207.7	4177.44	3.68987e-07	intronic	SMYD3	.
LFO	16:31568426	A	G	22207.7	4177.44	3.68987e-07	intronic	SMYD3	.
LFO	16:49559241	C	G	21447.1	4025.5	3.49499e-07	intronic	ARHGEF16	.
LFO	16:52141387	T	C	19228.1	3676.84	5.5007e-07	intronic	FHAD1	.
LFO	17:660479	T	A	18529.2	3316.36	1.02973e-07	intronic	CPE	.
LFO	17:4729654	C	T	22145.8	4281.53	7.14172e-07	downstream	ARFIP1	.
LFO	17:66361042	T	C	15821.3	3072.08	7.90697e-07	intergenic	LOC614881,TRNAG-ACC	dist\x3d19997\x3bdist\x3d65302
LFO	18:7154190	C	T	18247	3453.68	4.29358e-07	intergenic	MAF,DYNLRB2	dist\x3d630119\x3bdist\x3d171584
LFO	18:16020147	G	A	18869.3	3660.32	7.72682e-07	intronic	PHKB	.
LFO	18:16020256	C	T	19231.6	3738	8.09343e-07	intronic	PHKB	.
LFO	18:46586446	G	A	19762.3	3765.91	5.05996e-07	intronic	NFKBID	.
LFO	18:46960907	*	G	16865.2	3197.06	4.45756e-07	intronic	ZNF382	.
LFO	18:47166100	T	C	18035.9	3502.27	7.91591e-07	intronic	LOC101907883	.
LFO	18:52493964	C	T	18733.4	3546.28	4.30923e-07	intergenic	CEACAM16,BCL3	dist\x3d5136\x3bdist\x3d26175
LFO	18:58096897	A	G	20927.4	3737.06	9.68881e-08	intronic	PPP2R1A	.
LFO	18:65693710	T	C	20370.6	3894.3	5.46604e-07	exonic	ZNF132	.
LFO	18:65732879	T	C	21086	4008.07	4.76205e-07	UTR3	SLC27A5	NM_001103273.1:c.*172G>A
LFO	18:65790939	T	C	20100.4	3552.46	7.3266e-08	intronic	MZF1	.
LFO	19:50571736	T	A	17420.9	3374.67	7.47946e-07	intergenic	CD7,CSNK1D	dist\x3d25807\x3bdist\x3d25534
LFO	19:57085337	G	C	-33389.2	6175.71	2.42123e-07	exonic	KIF19	.
LFO	19:60168756	G	C	24188	3597.07	3.29916e-10	intergenic	TRNAG-UCC,KCNJ2	dist\x3d1059969\x3bdist\x3d439789
LFO	19:60168819	G	C	20701.3	3397.85	8.63641e-09	intergenic	TRNAG-UCC,KCNJ2	dist\x3d1060032\x3bdist\x3d439726
LFO	19:60168821	T	A	18661.6	3322.52	8.94182e-08	intergenic	TRNAG-UCC,KCNJ2	dist\x3d1060034\x3bdist\x3d439724
LFO	19:60168866	T	A	17241.9	3251.72	3.93175e-07	intergenic	TRNAG-UCC,KCNJ2	dist\x3d1060079\x3bdist\x3d439679
LFO	19:60168871	A	G	17705.7	3268.77	2.30933e-07	intergenic	TRNAG-UCC,KCNJ2	dist\x3d1060084\x3bdist\x3d439674
LFO	19:60170742	T	A	19032.7	3494.02	2.00025e-07	intergenic	TRNAG-UCC,KCNJ2	dist\x3d1061955\x3bdist\x3d437803
LFO	19:60170766	C	T	20167.2	3501.51	4.48402e-08	intergenic	TRNAG-UCC,KCNJ2	dist\x3d1061979\x3bdist\x3d437779
LFO	19:62954230	A	G	19651.3	3814.96	7.86756e-07	intronic	PRKCA	.
LFO	20:774699	G	T	18773.5	3226.85	3.37322e-08	intronic	SLIT3	.
LFO	20:774710	A	G	18422.5	3181.95	3.87241e-08	intronic	SLIT3	.
LFO	20:1049957	T	C	20991.5	3549.28	2.09916e-08	intronic	SLIT3	.
LFO	20:1050011	C	T	18028.1	3429.29	4.84595e-07	intronic	SLIT3	.
LFO	20:1067319	T	A	19908.6	3515.49	7.15433e-08	intronic	SLIT3	.
LFO	20:36971587	T	C	19593.2	3802.72	7.82075e-07	intergenic	WDR70,NUP155	dist\x3d2625\x3bdist\x3d2772
LFO	20:68253827	C	T	17277.4	3302.97	5.46612e-07	intergenic	LOC101902976,IRX1	dist\x3d175011\x3bdist\x3d1076390
LFO	21:42112199	T	C	20516.1	4014.14	9.43733e-07	intronic	NUBPL	.
LFO	23:1271768	*	G	23241	4093.99	6.69551e-08	intergenic	KHDRBS2,PRIM2	dist\x3d310542\x3bdist\x3d1288776
LFO	23:1320892	A	T	20934.5	3615.71	3.86839e-08	intergenic	KHDRBS2,PRIM2	dist\x3d359666\x3bdist\x3d1239652
LFO	23:1571435	C	T	18490.1	3488.34	3.96565e-07	intergenic	KHDRBS2,PRIM2	dist\x3d610209\x3bdist\x3d989109
LFO	23:47254437	T	C	22117.5	3483.74	2.34554e-09	intergenic	TRNAQ-CUG,EEF1E1	dist\x3d11370\x3bdist\x3d112825
LFO	23:47256804	G	C	21643.1	4192.3	7.46815e-07	intergenic	TRNAQ-CUG,EEF1E1	dist\x3d13737\x3bdist\x3d110458
LFO	23:47256898	T	C	19589	3554.12	1.47566e-07	intergenic	TRNAQ-CUG,EEF1E1	dist\x3d13831\x3bdist\x3d110364
LFO	24:11455151	G	A	17446.9	3352.01	6.15653e-07	intergenic	CDH7,TRNAC-GCA	dist\x3d526923\x3bdist\x3d390694
LFO	24:17708364	A	G	18646.8	3441.73	2.29607e-07	intergenic	TRNAK-UUU,TRNAW-CCA	dist\x3d405278\x3bdist\x3d145636
LFO	24:20394329	T	C	18824.3	3487.3	2.5203e-07	intronic	FHOD3	.
LFO	24:24239173	T	C	13715.4	2680.14	9.16505e-07	intergenic	CCDC178,KLHL14	dist\x3d42585\x3bdist\x3d143510
LFO	24:24239268	T	A	16652.2	3014.08	1.38615e-07	intergenic	CCDC178,KLHL14	dist\x3d42680\x3bdist\x3d143415
LFO	24:28243756	T	C	19846.3	3694.46	2.84662e-07	intergenic	NONE,TRNAW-CCA	dist\x3dNONE\x3bdist\x3d309919
LFO	24:28248314	C	T	18362.8	3555.97	7.42207e-07	intergenic	NONE,TRNAW-CCA	dist\x3dNONE\x3bdist\x3d305361
LFO	24:28958497	A	G	24332.3	3548.19	1.62213e-10	intergenic	CDH2,CHST9	dist\x3d54382\x3bdist\x3d730326
LFO	24:28966019	G	C	20403.3	3817.85	3.23917e-07	intergenic	CDH2,CHST9	dist\x3d61904\x3bdist\x3d722804
LFO	24:28981919	A	G	23430.1	3771.76	4.72037e-09	intergenic	CDH2,CHST9	dist\x3d77804\x3bdist\x3d706904
LFO	24:28981978	A	G	19291.5	3456.3	1.05805e-07	intergenic	CDH2,CHST9	dist\x3d77863\x3bdist\x3d706845
LFO	24:28983177	C	G	20326.3	3945.32	7.83531e-07	intergenic	CDH2,CHST9	dist\x3d79062\x3bdist\x3d705646
LFO	24:33096991	A	G	23256.2	4078.82	5.93793e-08	intronic	NPC1	.
LFO	24:33223584	G	A	18896.5	3631.73	6.20593e-07	intronic	TMEM241	.
LFO	24:60416966	C	A	20962.6	3879.79	2.46114e-07	intergenic	RNF152,PIGN	dist\x3d34836\x3bdist\x3d75643
LFO	26:20584172	T	C	21386	4000.5	3.21431e-07	intergenic	NKX2-3,SLC25A28	dist\x3d49801\x3bdist\x3d12245
LFO	26:24606877	T	C	20371.7	3737.15	1.96368e-07	intronic	COL17A1	.
LFO	26:24664866	C	A	19156.3	3438.29	1.11023e-07	intergenic	COL17A1,SFR1	dist\x3d26603\x3bdist\x3d21732
LFO	26:24671810	G	A	17536.8	3121.18	8.85928e-08	intergenic	COL17A1,SFR1	dist\x3d33547\x3bdist\x3d14788
LFO	26:25206535	G	C	18129.5	3495.32	6.68821e-07	intronic	SORCS3	.
LFO	26:25209683	G	A	19835.3	3558.69	1.09803e-07	intronic	SORCS3	.
LFO	26:25210690	T	C	22473.8	3590.25	3.70261e-09	intronic	SORCS3	.
LFO	26:25225333	T	C	23195.6	4293.39	2.46591e-07	intronic	SORCS3	.
LFO	26:25461064	C	A	23834.7	4351.16	1.73182e-07	intronic	SORCS3	.
LFO	26:26273073	C	T	19545.3	3425.9	5.83984e-08	intergenic	SORCS3,TRNAA-AGC	dist\x3d90561\x3bdist\x3d211366
LFO	26:26273835	C	T	17788.2	3455.76	8.00106e-07	intergenic	SORCS3,TRNAA-AGC	dist\x3d91323\x3bdist\x3d210604
LFO	26:27030551	A	C	21944.7	3717.35	2.21622e-08	intergenic	TRNAA-AGC,SORCS1	dist\x3d546041\x3bdist\x3d524326
LFO	26:28267158	G	A	18191.1	3543.29	8.50512e-07	intergenic	SORCS1,MIR2285K-4	dist\x3d137529\x3bdist\x3d899310
LFO	26:28456046	T	C	21345.8	4000.87	3.37556e-07	intergenic	SORCS1,MIR2285K-4	dist\x3d326417\x3bdist\x3d710422
LFO	26:32829690	T	C	21436.8	3783.39	7.05408e-08	intronic	TECTB	.
LFO	26:36499210	G	C	18904.4	3612.56	5.41449e-07	intronic	GFRA1	.
LFO	26:38819506	C	T	17865.3	3500.64	9.76383e-07	intergenic	FAM204A,PRLHR	dist\x3d207576\x3bdist\x3d59086
LFO	26:43306736	C	G	21040.2	3563.6	2.20691e-08	intergenic	BUB3,GPR26	dist\x3d346667\x3bdist\x3d112466
LFO	26:49578307	A	G	20487.5	3660.02	9.79624e-08	intergenic	GLRX3,TRNAC-ACA	dist\x3d154282\x3bdist\x3d337266
LFO	27:1181423	A	G	19361.2	3423.22	7.4091e-08	intronic	DLGAP2	.
LFO	28:24799789	G	A	19009.5	3408.12	1.07754e-07	intronic	RUFY2	.
LFO	28:29319582	A	G	22626.8	3963.67	5.7444e-08	intronic	CFAP70	.
LFO	28:35080586	G	A	21143.9	3569.56	2.00702e-08	intergenic	ZCCHC24,ANXA11	dist\x3d30026\x3bdist\x3d38594
LFO	28:35541457	*	G	21502.7	3740.99	4.74681e-08	intronic	LOC101907929	.
LFO	28:35541458	*	G	21502.7	3740.99	4.74681e-08	intronic	LOC101907929	.
LFO	28:35542326	G	C	21717.7	4110.32	4.28666e-07	intronic	LOC101907929	.
LFO	28:35641568	A	G	23781.6	3994.03	1.72204e-08	upstream	MBL1	.
LFO	28:35643219	C	T	22642.4	3842.2	2.33115e-08	intergenic	MBL1,SFTPA1	dist\x3d1963\x3bdist\x3d2625
LFO	28:39749721	A	G	19295.4	3665.73	4.70028e-07	intergenic	CCSER2,TRNAG-CCC	dist\x3d319339\x3bdist\x3d254356
LFO	28:41496829	A	G	20059	3785.93	4.00709e-07	intronic	BMPR1A	.
LFO	28:43864779	T	C	19504.6	3692.82	4.32494e-07	intronic	OGDHL	.
LFO	29:23027050	G	T	24719.4	3839.81	1.48227e-09	intergenic	ANO5,NELL1	dist\x3d385136\x3bdist\x3d228742
LFO	29:27585937	G	C	20551.2	3872.12	3.84043e-07	intergenic	LOC100301297,LOC788554	dist\x3d15890\x3bdist\x3d1322
LFO	29:27631080	T	C	18618.2	3618.71	8.08928e-07	intergenic	LOC788607,LOC531225	dist\x3d8728\x3bdist\x3d17808
LFO	29:28594465	T	C	20194.8	3913.98	7.56842e-07	intergenic	TMEM218,PKNOX2	dist\x3d45557\x3bdist\x3d2175
HFO	1:572893	G	A	-30750.7	5633.65	1.89769e-07	intronic	LOC618212	.
HFO	1:112529413	G	A	17194	3053.78	8.37285e-08	intronic	MME	.
HFO	1:152619188	C	T	11089.8	2075.96	3.27202e-07	intronic	HACL1	.
HFO	2:9177644	T	C	12797.7	2489.7	8.26519e-07	intergenic	CALCRL,ZSWIM2	dist\x3d156510\x3bdist\x3d313983
HFO	2:11770677	C	T	16033.8	3034.46	4.28267e-07	intronic	ZNF804A	.
HFO	2:17198573	C	T	13299	2409.39	1.42042e-07	intronic	ZNF385B	.
HFO	2:131541342	A	G	13985.7	2734.26	9.2677e-07	intronic	EIF4G3	.
HFO	2:131957270	T	G	17981	3027.34	1.85283e-08	intronic	KIF17	.
HFO	2:134141088	T	C	15606.5	2932.19	3.58235e-07	intergenic	LOC536229,KLHDC7A	dist\x3d111359\x3bdist\x3d43250
HFO	2:134183876	T	C	14856.1	2700.04	1.54322e-07	downstream	KLHDC7A	.
HFO	2:134541216	G	C	14531.4	2680.64	2.26386e-07	intronic	IGSF21	.
HFO	2:135912788	T	C	15843.4	3046.71	6.29154e-07	intergenic	ARHGEF19,EPHA2	dist\x3d1568\x3bdist\x3d32429
HFO	3:34068354	A	G	14738	2689.63	1.71738e-07	intronic	SORT1	.
HFO	3:39562407	G	T	18582	2793.64	4.84845e-10	intergenic	NONE,LOC539383	dist\x3dNONE\x3bdist\x3d180747
HFO	3:39566800	T	C	17492.4	2907.18	1.26051e-08	intergenic	NONE,LOC539383	dist\x3dNONE\x3bdist\x3d176354
HFO	3:39585629	G	T	17321.2	2697.64	1.61702e-09	intergenic	NONE,LOC539383	dist\x3dNONE\x3bdist\x3d157525
HFO	3:42806425	A	G	12989.3	2436.81	3.45212e-07	intronic	CDC14A	.
HFO	3:42807111	C	T	11797.9	2262.78	5.90872e-07	intronic	CDC14A	.
HFO	3:42821620	C	T	14524.8	2595.59	9.87498e-08	intronic	CDC14A	.
HFO	3:42847891	T	C	14243.3	2682.93	3.81577e-07	intronic	CDC14A	.
HFO	3:42859310	C	T	15150.8	2734.86	1.29044e-07	intronic	CDC14A	.
HFO	3:42859350	*	A	14971.6	2819.05	3.78059e-07	intronic	CDC14A	.
HFO	3:42859359	C	T	15027.9	2825.38	3.64288e-07	intronic	CDC14A	.
HFO	3:42859365	T	G	14156.9	2758.36	8.5663e-07	intronic	CDC14A	.
HFO	3:42859394	T	A	14674.8	2768.41	3.96083e-07	intronic	CDC14A	.
HFO	3:42864300	G	A	13033.2	2451.88	3.69831e-07	intronic	CDC14A	.
HFO	3:44123032	C	A	14172.7	2727.29	6.39431e-07	intergenic	PLPPR4,PLPPR5	dist\x3d146755\x3bdist\x3d95159
HFO	3:89439515	G	A	14594.1	2766.4	4.45258e-07	intronic	FYB2	.
HFO	3:97797076	G	A	14623	2862.02	9.50747e-07	intronic	SPATA6	.
HFO	3:97824791	A	T	13778.6	2698.2	9.62611e-07	intronic	SPATA6	.
HFO	3:102819504	C	T	12671.1	2452.2	7.31089e-07	intronic	CFAP57	.
HFO	4:1052190	C	G	16401.8	3141.59	5.72298e-07	intergenic	TRNAC-ACA,NONE	dist\x3d115930\x3bdist\x3dNONE
HFO	4:28012392	*	T	13378.6	2511.77	3.51865e-07	intergenic	FERD3L,TWISTNB	dist\x3d156598\x3bdist\x3d387212
HFO	4:65577759	*	A	16008	2639.07	9.87526e-09	intronic	MINDY4	.
HFO	5:41712048	T	G	16007.9	2900.27	1.42195e-07	intergenic	ABCD2,KIF21A	dist\x3d228542\x3bdist\x3d20622
HFO	5:75946478	A	G	13894.3	2516.28	1.4064e-07	intergenic	CARD10,USP18	dist\x3d6377\x3bdist\x3d55474
HFO	5:114720064	T	C	15375.9	2874.81	3.1746e-07	intronic	SAMM50	.
HFO	6:37932891	G	A	15666.9	2911.81	2.73513e-07	intergenic	LCORL,SLIT2	dist\x3d375746\x3bdist\x3d1846384
HFO	6:40159515	A	G	16833.4	3127.27	2.70563e-07	intronic	SLIT2	.
HFO	6:44777570	C	T	16599.2	2689.52	5.78687e-09	intergenic	SEPSECS,PI4K2B	dist\x3d40668\x3bdist\x3d27947
HFO	6:46665758	T	C	12923.3	2515.83	8.39538e-07	intergenic	STIM2,TRNAS-GGA	dist\x3d209619\x3bdist\x3d1852188
HFO	6:49491435	C	T	16054.7	2854.28	8.60176e-08	intergenic	TRNAS-GGA,PCDH7	dist\x3d973418\x3bdist\x3d462951
HFO	6:77789352	T	C	15105.7	2778.22	2.09673e-07	intergenic	ADGRL3,TRNAC-GCA	dist\x3d130582\x3bdist\x3d949144
HFO	6:93873882	A	G	14365.7	2731.79	4.80978e-07	intergenic	PAQR3,NAA11	dist\x3d196075\x3bdist\x3d156347
HFO	6:93873898	A	G	14644.6	2633.36	1.16592e-07	intergenic	PAQR3,NAA11	dist\x3d196091\x3bdist\x3d156331
HFO	6:106428624	C	A	15344.9	2950.27	6.26246e-07	intergenic	TRNAA-UGC,HS3ST1	dist\x3d354522\x3bdist\x3d74972
HFO	7:31040044	G	A	13763.7	2606.46	4.3483e-07	intronic	SNX2	.
HFO	8:2215489	A	G	16698.2	2855.24	2.90639e-08	intergenic	LOC520638,GALNTL6	dist\x3d214987\x3bdist\x3d1724603
HFO	8:34700252	A	G	15388.5	2717.11	7.13855e-08	intergenic	NONE,PTPRD	dist\x3dNONE\x3bdist\x3d1328395
HFO	8:35895667	T	C	16012.6	3024.95	4.09647e-07	intergenic	NONE,PTPRD	dist\x3dNONE\x3bdist\x3d132980
HFO	8:36803926	G	C	17280.5	3046.44	6.84213e-08	intergenic	PTPRD,DMAC1	dist\x3d200180\x3bdist\x3d291369
HFO	8:36811418	A	G	16136	2922.03	1.40343e-07	intergenic	PTPRD,DMAC1	dist\x3d207672\x3bdist\x3d283877
HFO	8:36823109	A	C	16248.7	3144.96	7.33334e-07	intergenic	PTPRD,DMAC1	dist\x3d219363\x3bdist\x3d272186
HFO	8:37104872	T	A	15522.4	2896.93	3.03442e-07	intergenic	DMAC1,TRNAC-GCA	dist\x3d7511\x3bdist\x3d618830
HFO	8:38699456	G	A	15326	2946.66	6.26381e-07	intronic	KIAA2026	.
HFO	8:42667894	C	T	15144	2876.23	4.66802e-07	intergenic	SMARCA2,TRNAE-UUC	dist\x3d118360\x3bdist\x3d108738
HFO	8:42867906	A	G	14193	2770.01	8.90513e-07	intergenic	TRNAC-GCA,DMRT2	dist\x3d64351\x3bdist\x3d638995
HFO	8:63007174	A	G	15240.8	2520.76	1.08978e-08	intergenic	XPA,FOXE1	dist\x3d98432\x3bdist\x3d45299
HFO	8:65268874	T	C	13889.8	2456.7	7.4806e-08	exonic	INVS	.
HFO	8:65286197	A	C	14239.6	2624.05	2.2041e-07	intronic	TEX10	.
HFO	8:65988980	G	A	13175.7	2541.87	6.79075e-07	intronic	CNTNAP3	.
HFO	8:67240373	T	C	15184	2762.99	1.59276e-07	intronic	SLC18A1	.
HFO	8:67492485	C	T	16905.8	2974.54	6.48337e-08	intergenic	LZTS1,TRNAC-GCA	dist\x3d63606\x3bdist\x3d367033
HFO	8:67492490	A	G	16905.8	2974.54	6.48337e-08	intergenic	LZTS1,TRNAC-GCA	dist\x3d63611\x3bdist\x3d367028
HFO	8:67492496	A	G	17679.7	2991.89	2.15281e-08	intergenic	LZTS1,TRNAC-GCA	dist\x3d63617\x3bdist\x3d367022
HFO	8:67492507	T	C	17838.6	2745.7	1.0897e-09	intergenic	LZTS1,TRNAC-GCA	dist\x3d63628\x3bdist\x3d367011
HFO	8:67492520	C	A	15478.7	2936.77	4.55252e-07	intergenic	LZTS1,TRNAC-GCA	dist\x3d63641\x3bdist\x3d366998
HFO	8:69437189	T	C	16567.9	3009.01	1.51482e-07	intronic	HR	.
HFO	8:74403216	T	C	16424.3	2945.02	1.08142e-07	intergenic	TRIM35,PTK2B	dist\x3d1267\x3bdist\x3d14111
HFO	8:75543347	G	T	14149.8	2755.42	8.45519e-07	intergenic	DCAF12,UBAP1	dist\x3d11354\x3bdist\x3d37070
HFO	8:112482674	A	G	14202.1	2766.31	8.50434e-07	intergenic	TMEM18,ALKAL2	dist\x3d5347\x3bdist\x3d256777
HFO	9:37308510	*	A	15743.3	2651.31	1.86782e-08	intergenic	MIR2479,LAMA4	dist\x3d266535\x3bdist\x3d867572
HFO	9:37308511	*	A	15743.3	2651.31	1.86782e-08	intergenic	MIR2479,LAMA4	dist\x3d266536\x3bdist\x3d867571
HFO	9:37424376	G	T	15714.5	2938.72	3.19126e-07	intergenic	MIR2479,LAMA4	dist\x3d382401\x3bdist\x3d751706
HFO	9:46289489	T	A	16203.9	2999.16	2.46379e-07	intergenic	TRNAM-CAU,GRIK2	dist\x3d101473\x3bdist\x3d1598210
HFO	9:85239125	T	C	17799	3173.74	9.313e-08	intergenic	SAMD5,SASH1	dist\x3d345538\x3bdist\x3d431154
HFO	9:90224260	G	A	15629	3052.58	9.06212e-07	intergenic	RGS17,OPRM1	dist\x3d200098\x3bdist\x3d580031
HFO	11:5447644	C	T	15111.2	2897.8	5.88679e-07	intergenic	AFF3,LONRF2	dist\x3d158170\x3bdist\x3d16110
HFO	11:5473340	C	T	15986.8	2688.78	1.79668e-08	intronic	LONRF2	.
HFO	11:5521683	A	C	15896.5	3077.34	7.36421e-07	intronic	CHST10	.
HFO	11:5530835	A	G	10916	2014.19	2.27803e-07	intergenic	CHST10,NMS	dist\x3d8140\x3bdist\x3d6622
HFO	11:7359233	T	C	12729.8	2373.61	2.96679e-07	intronic	SLC9A2	.
HFO	11:13950671	G	A	14324.1	2802.78	9.44962e-07	intronic	TGFA	.
HFO	11:32089477	C	A	16989.3	3200.15	3.81516e-07	intergenic	FSHR,NRXN1	dist\x3d638940\x3bdist\x3d185922
HFO	11:45788498	A	G	16089.5	3082.88	5.77302e-07	intergenic	UXS1,C11H2orf40	dist\x3d9935\x3bdist\x3d40517
HFO	11:45812094	C	G	16133.5	2973.54	2.21309e-07	intergenic	UXS1,C11H2orf40	dist\x3d33531\x3bdist\x3d16921
HFO	11:45814885	G	A	15197.2	2594.37	2.7743e-08	intergenic	UXS1,C11H2orf40	dist\x3d36322\x3bdist\x3d14130
HFO	11:45814903	C	T	15436.3	2757.01	9.73702e-08	intergenic	UXS1,C11H2orf40	dist\x3d36340\x3bdist\x3d14112
HFO	11:80050925	T	C	11928.5	2338.23	9.84941e-07	intergenic	OSR1,NT5C1B	dist\x3d637814\x3bdist\x3d92760
HFO	11:87308242	A	G	14729.2	2835.46	6.45239e-07	intronic	HPCAL1	.
HFO	11:92068258	A	G	14869.9	2569.6	3.92613e-08	intergenic	TRNAS-ACU,LOC525099	dist\x3d601864\x3bdist\x3d167202
HFO	11:92657814	C	T	15942.2	3116.7	9.26397e-07	intronic	DAB2IP	.
HFO	11:92668451	T	A	16604	3074.97	2.4995e-07	intronic	DAB2IP	.
HFO	11:92670821	T	A	19165.3	2921.88	7.87115e-10	intronic	DAB2IP	.
HFO	11:92671529	G	C	15012.5	2726.39	1.51293e-07	intronic	DAB2IP	.
HFO	11:93765483	A	C	14436.2	2496.08	3.98967e-08	intergenic	OR1B1,OR1L1	dist\x3d3547\x3bdist\x3d25600
HFO	11:93938501	G	A	13737.3	2573.87	3.34578e-07	upstream	LOC525818	.
HFO	11:93938511	T	C	13518.2	2567.78	4.68274e-07	upstream	LOC525818	.
HFO	12:7975727	T	C	15002.5	2926.39	8.79218e-07	intergenic	NONE,LOC101905933	dist\x3dNONE\x3bdist\x3d1064909
HFO	12:8092171	G	A	14398.6	2674.99	2.70687e-07	intergenic	NONE,LOC101905933	dist\x3dNONE\x3bdist\x3d948465
HFO	12:8432085	A	G	15882.8	3074.99	7.38057e-07	intergenic	NONE,LOC101905933	dist\x3dNONE\x3bdist\x3d608551
HFO	12:18394701	*	C	14759.8	2831.28	5.93016e-07	intergenic	RCBTB2,CYSLTR2	dist\x3d110464\x3bdist\x3d34052
HFO	12:25396642	A	G	14572.1	2803.4	6.35365e-07	intronic	DCLK1	.
HFO	12:25722016	T	C	14227.3	2715.44	5.25684e-07	intergenic	DCLK1,NBEA	dist\x3d26679\x3bdist\x3d47079
HFO	12:27088852	C	A	15879.7	2904.12	1.81389e-07	intergenic	TRNAC-GCA,RFC3	dist\x3d513224\x3bdist\x3d290064
HFO	12:27701309	G	T	15497.5	2793.73	1.24595e-07	intronic	STARD13	.
HFO	12:29136002	*	C	17189.8	3334.76	7.73938e-07	intergenic	FRY,RXFP2	dist\x3d59920\x3bdist\x3d76312
HFO	12:65218182	T	G	12284.2	2408.27	9.87869e-07	intergenic	NONE,LOC112449108	dist\x3dNONE\x3bdist\x3d467837
HFO	13:2163950	G	A	17850.3	3102.42	4.61463e-08	intronic	PLCB4	.
HFO	13:2467110	A	G	15335.3	2828.12	2.24732e-07	intronic	PLCB4	.
HFO	13:3235949	A	G	15218.3	2816.55	2.45943e-07	intergenic	PAK5,ANKEF1	dist\x3d247033\x3bdist\x3d16197
HFO	13:14442183	T	C	17666.6	2970.88	1.78911e-08	intergenic	CELF2,GATA3	dist\x3d1257320\x3bdist\x3d1463119
HFO	13:15887927	T	C	17579.8	3007.47	2.94761e-08	intergenic	NONE,GATA3	dist\x3dNONE\x3bdist\x3d17375
HFO	13:30880731	T	C	12809.3	2439.36	4.98158e-07	intergenic	MINDY3,PTER	dist\x3d480845\x3bdist\x3d38372
HFO	13:30881787	C	T	12244.9	2395.24	9.38671e-07	intergenic	MINDY3,PTER	dist\x3d481901\x3bdist\x3d37316
HFO	13:30881794	G	T	12244.9	2395.24	9.38671e-07	intergenic	MINDY3,PTER	dist\x3d481908\x3bdist\x3d37309
HFO	13:36639669	T	A	14612.9	2769.66	4.44062e-07	intronic	ARMC4	.
HFO	13:36657816	C	T	16350.2	2791.03	2.76937e-08	intronic	ARMC4	.
HFO	13:36657818	T	A	16350.2	2791.03	2.76937e-08	intronic	ARMC4	.
HFO	13:45281950	G	A	12840.7	2403.01	3.24808e-07	intergenic	PFKP,ADARB2	dist\x3d121134\x3bdist\x3d757743
HFO	13:45281964	C	T	12840.7	2403.01	3.24808e-07	intergenic	PFKP,ADARB2	dist\x3d121148\x3bdist\x3d757729
HFO	13:45282591	C	T	11952.1	2327.89	8.49164e-07	intergenic	PFKP,ADARB2	dist\x3d121775\x3bdist\x3d757102
HFO	13:45530617	A	G	13882.7	2593.54	3.11153e-07	intergenic	PFKP,ADARB2	dist\x3d369801\x3bdist\x3d509076
HFO	13:46941224	T	C	16889.8	2692.82	3.47366e-09	intergenic	ZMYND11,PRNP	dist\x3d28604\x3bdist\x3d98713
HFO	13:47107678	A	G	13468.9	2577.15	5.5828e-07	intergenic	PRND,RASSF2	dist\x3d16633\x3bdist\x3d23450
HFO	13:47112446	A	G	15309.4	2690.89	6.30304e-08	intergenic	PRND,RASSF2	dist\x3d21401\x3bdist\x3d18682
HFO	13:47113974	A	G	15816.7	3053.41	6.8982e-07	intergenic	PRND,RASSF2	dist\x3d22929\x3bdist\x3d17154
HFO	13:47524610	A	G	15545.6	2840.18	1.76758e-07	intergenic	CDS2,LOC787679	dist\x3d25894\x3bdist\x3d21707
HFO	13:47545559	T	C	15182.1	2897.64	5.25469e-07	downstream	LOC787679	.
HFO	13:47572546	T	C	15292.5	2866.17	3.37169e-07	intergenic	PROKR2,GPCPD1	dist\x3d11925\x3bdist\x3d144811
HFO	13:49228775	T	C	13336.5	2571.3	6.69162e-07	intergenic	BMP2,HAO1	dist\x3d65358\x3bdist\x3d1463986
HFO	13:54166819	A	G	16108.6	3103.46	6.57495e-07	intergenic	EEF1A2,KCNQ2	dist\x3d7122\x3bdist\x3d4586
HFO	13:58815193	T	C	14115.1	2727.4	7.04795e-07	intronic	SPO11	.
HFO	13:59849190	C	T	14403.6	2740.85	4.88899e-07	intronic	SNPH	.
HFO	13:59866741	A	G	13796.6	2606.88	4.11847e-07	intergenic	SNPH,RAD21L1	dist\x3d6889\x3bdist\x3d2226
HFO	13:73454864	T	C	17367.8	3080.1	8.04572e-08	intronic	STK4	.
HFO	13:74147801	T	C	15501.5	2987.5	6.62741e-07	intronic	TKDP2	.
HFO	13:75303679	A	T	15939.7	3107.59	8.68702e-07	intronic	SLC13A3	.
HFO	13:75314877	A	G	14639.8	2754.4	3.70774e-07	intronic	SLC13A3	.
HFO	13:75330946	A	G	17494.1	3334.38	5.08595e-07	intronic	SLC13A3	.
HFO	13:81496682	G	A	14629	2743.82	3.43345e-07	intergenic	BCAS1,CYP24A1	dist\x3d5799\x3bdist\x3d95500
HFO	14:47219872	C	T	15570.6	2707.37	4.67139e-08	intergenic	SLC30A8,AARD	dist\x3d69326\x3bdist\x3d118637
HFO	14:49009759	C	T	12787.1	2327.3	1.60123e-07	intergenic	TRPS1,CSMD3	dist\x3d100760\x3bdist\x3d1796022
HFO	14:49836426	C	T	13814.7	2639.05	5.37064e-07	intergenic	TRPS1,CSMD3	dist\x3d927427\x3bdist\x3d969355
HFO	14:49956726	T	C	14737.7	2853.66	7.4036e-07	intergenic	TRPS1,CSMD3	dist\x3d1047727\x3bdist\x3d849055
HFO	14:50502032	A	C	16565.6	2878.87	4.60295e-08	intergenic	TRPS1,CSMD3	dist\x3d1593033\x3bdist\x3d303749
HFO	14:54796237	T	C	15020	2904.94	7.2036e-07	intronic	SYBU	.
HFO	14:54980148	T	C	17536.8	2778	2.82229e-09	intronic	PKHD1L1	.
HFO	14:56203982	G	A	16506.9	2998.61	1.52365e-07	intergenic	EMC2,EIF3E	dist\x3d180155\x3bdist\x3d41973
HFO	14:81818946	T	C	15489.4	2892.13	3.06998e-07	intronic	MTBP	.
HFO	14:81831567	A	G	15571.5	2984.07	5.79338e-07	intronic	MTBP	.
HFO	14:81849683	A	G	17024.8	2878.45	2.0963e-08	intronic	MTBP	.
HFO	14:81862595	T	C	14579.2	2764.66	4.49446e-07	intronic	MTBP	.
HFO	14:81875933	A	G	15868.1	3108.94	9.73828e-07	intronic	SNTB1	.
HFO	15:52707419	A	G	16484.5	3146.94	5.28439e-07	intergenic	FCHSD2,P2RY2	dist\x3d75713\x3bdist\x3d2263
HFO	15:62362835	T	C	14563.3	2810.9	6.8673e-07	intronic	ELP4	.
HFO	15:68177770	A	G	13554.4	2623.91	7.3622e-07	intergenic	C15H11orf74,NONE	dist\x3d1088413\x3bdist\x3dNONE
HFO	15:84093055	T	A	15328.7	2777.76	1.42913e-07	intergenic	LOC100271685,OR4A15	dist\x3d159077\x3bdist\x3d62022
HFO	15:84186758	T	C	16072.9	3076.76	5.64248e-07	intergenic	OR4A15,LOC104970693	dist\x3d30189\x3bdist\x3d29703
HFO	16:10433913	G	A	13354.6	2573.66	6.62218e-07	intergenic	TRNAK-UUU,CDC73	dist\x3d724104\x3bdist\x3d1593105
HFO	16:31568420	G	A	17523	3077.67	6.17583e-08	intronic	SMYD3	.
HFO	16:31568426	A	G	17523	3077.67	6.17583e-08	intronic	SMYD3	.
HFO	16:47563403	T	C	12951.6	2494.55	6.53125e-07	intergenic	NPHP4,AJAP1	dist\x3d99497\x3bdist\x3d1008696
HFO	16:49559241	C	G	16885.1	3035.21	1.15551e-07	intronic	ARHGEF16	.
HFO	16:52141387	T	C	15477.6	2760.76	9.39988e-08	intronic	FHAD1	.
HFO	17:660479	T	A	13864.3	2525.54	1.63749e-07	intronic	CPE	.
HFO	17:880765	A	G	13642.2	2644.41	7.59443e-07	intergenic	CPE,MIR2285J-1	dist\x3d159319\x3bdist\x3d485056
HFO	17:42111546	C	T	14917.4	2838.61	4.88867e-07	intergenic	GLRB,PDGFC	dist\x3d1151\x3bdist\x3d114717
HFO	18:3121206	G	A	16418.2	3017.78	2.06467e-07	intergenic	TERF2IP,CNTNAP4	dist\x3d177287\x3bdist\x3d299282
HFO	18:3121208	G	C	16418.2	3017.78	2.06467e-07	intergenic	TERF2IP,CNTNAP4	dist\x3d177289\x3bdist\x3d299280
HFO	18:46586446	G	A	15391.4	2846.03	2.40439e-07	intronic	NFKBID	.
HFO	18:47163891	A	G	12446.9	2424.02	8.47136e-07	intronic	LOC101907883	.
HFO	18:47166100	T	C	14804.8	2601.89	6.28367e-08	intronic	LOC101907883	.
HFO	18:48406146	C	T	14895.1	2920.53	9.91045e-07	intronic	ACTN4	.
HFO	18:49850714	A	G	16216.2	3147.05	7.80629e-07	intronic	SPTBN4	.
HFO	18:52493964	C	T	14698.7	2675.99	1.6133e-07	intergenic	CEACAM16,BCL3	dist\x3d5136\x3bdist\x3d26175
HFO	18:65790939	T	C	14712	2719.7	2.38879e-07	intronic	MZF1	.
HFO	19:50571736	T	A	13629.5	2548.59	3.18438e-07	intergenic	CD7,CSNK1D	dist\x3d25807\x3bdist\x3d25534
HFO	19:54773678	A	G	14371.4	2715.02	4.1007e-07	intergenic	SEC14L1,MIR6516	dist\x3d18010\x3bdist\x3d24946
HFO	19:60168756	G	C	17658.4	2761.59	1.85515e-09	intergenic	TRNAG-UCC,KCNJ2	dist\x3d1059969\x3bdist\x3d439789
HFO	19:60168819	G	C	15125.6	2603.06	3.49427e-08	intergenic	TRNAG-UCC,KCNJ2	dist\x3d1060032\x3bdist\x3d439726
HFO	19:60168821	T	A	13628.7	2542.21	2.99535e-07	intergenic	TRNAG-UCC,KCNJ2	dist\x3d1060034\x3bdist\x3d439724
HFO	19:60168866	T	A	12782	2479.62	7.73646e-07	intergenic	TRNAG-UCC,KCNJ2	dist\x3d1060079\x3bdist\x3d439679
HFO	19:60168871	A	G	13127.4	2493.04	4.65909e-07	intergenic	TRNAG-UCC,KCNJ2	dist\x3d1060084\x3bdist\x3d439674
HFO	19:60170742	T	A	13742.1	2677.54	8.56618e-07	intergenic	TRNAG-UCC,KCNJ2	dist\x3d1061955\x3bdist\x3d437803
HFO	19:60170766	C	T	14576.1	2685.64	2.19515e-07	intergenic	TRNAG-UCC,KCNJ2	dist\x3d1061979\x3bdist\x3d437779
HFO	20:774699	G	T	14312.4	2447.95	2.92906e-08	intronic	SLIT3	.
HFO	20:774710	A	G	14388.3	2400.66	1.41732e-08	intronic	SLIT3	.
HFO	20:1049957	T	C	16815.5	2659.93	2.69461e-09	intronic	SLIT3	.
HFO	20:1050011	C	T	14167.6	2587.07	1.744e-07	intronic	SLIT3	.
HFO	20:1067319	T	A	15290	2662.86	4.88506e-08	intronic	SLIT3	.
HFO	20:15120092	A	G	13604.5	2662.64	9.50545e-07	intronic	RNF180	.
HFO	20:59195436	C	T	16151.5	3075.12	4.95358e-07	intronic	DNAH5	.
HFO	20:64911980	T	C	14960.8	2854.84	5.23008e-07	intergenic	SEMA5A,MTRR	dist\x3d689148\x3bdist\x3d398125
HFO	20:68253827	C	T	13749	2485.79	1.34583e-07	intergenic	LOC101902976,IRX1	dist\x3d175011\x3bdist\x3d1076390
HFO	20:68850728	T	C	14010.1	2660.18	4.63791e-07	intergenic	LOC101902976,IRX1	dist\x3d771912\x3bdist\x3d479489
HFO	20:68918490	T	C	14605.5	2760.66	4.15258e-07	intergenic	LOC101902976,IRX1	dist\x3d839674\x3bdist\x3d411727
HFO	21:4963669	C	T	15333.4	3002.92	9.64491e-07	intronic	GABRG3	.
HFO	21:42112199	T	C	16455.5	3017.65	1.94573e-07	intronic	NUBPL	.
HFO	21:43346130	C	T	17062.9	3139.84	2.12507e-07	intronic	NPAS3	.
HFO	23:1271768	*	G	17534.5	3076.89	6.02257e-08	intergenic	KHDRBS2,PRIM2	dist\x3d310542\x3bdist\x3d1288776
HFO	23:1320892	A	T	16003.9	2656.15	1.20971e-08	intergenic	KHDRBS2,PRIM2	dist\x3d359666\x3bdist\x3d1239652
HFO	23:39455537	A	G	15063.8	2803.45	2.82792e-07	downstream	TPMT	.
HFO	23:47254437	T	C	16554.6	2655.03	4.19424e-09	intergenic	TRNAQ-CUG,EEF1E1	dist\x3d11370\x3bdist\x3d112825
HFO	23:47256636	G	A	16766.1	3188.85	4.83192e-07	intergenic	TRNAQ-CUG,EEF1E1	dist\x3d13569\x3bdist\x3d110626
HFO	23:47256804	G	C	17145.1	3158.6	2.18872e-07	intergenic	TRNAQ-CUG,EEF1E1	dist\x3d13737\x3bdist\x3d110458
HFO	23:47256898	T	C	15134.9	2689.15	8.46485e-08	intergenic	TRNAQ-CUG,EEF1E1	dist\x3d13831\x3bdist\x3d110364
HFO	24:16991352	A	G	14107	2683.88	4.86608e-07	intergenic	NONE,TRNAK-UUU	dist\x3dNONE\x3bdist\x3d311664
HFO	24:24239173	T	C	10353.8	2010.33	7.89725e-07	intergenic	CCDC178,KLHL14	dist\x3d42585\x3bdist\x3d143510
HFO	24:28243756	T	C	14674	2800.44	5.24526e-07	intergenic	NONE,TRNAW-CCA	dist\x3dNONE\x3bdist\x3d309919
HFO	24:28958497	A	G	17717.8	2696.45	7.40952e-10	intergenic	CDH2,CHST9	dist\x3d54382\x3bdist\x3d730326
HFO	24:28965872	G	A	16278.5	3035.36	2.96774e-07	intergenic	CDH2,CHST9	dist\x3d61757\x3bdist\x3d722951
HFO	24:28966019	G	C	15653.4	2893.24	2.37863e-07	intergenic	CDH2,CHST9	dist\x3d61904\x3bdist\x3d722804
HFO	24:28981919	A	G	17964.2	2839.28	2.62278e-09	intergenic	CDH2,CHST9	dist\x3d77804\x3bdist\x3d706904
HFO	24:28981978	A	G	14760.8	2620.24	8.2546e-08	intergenic	CDH2,CHST9	dist\x3d77863\x3bdist\x3d706845
HFO	24:28983177	C	G	15471.9	2994.41	7.32205e-07	intergenic	CDH2,CHST9	dist\x3d79062\x3bdist\x3d705646
HFO	24:33096991	A	G	18902.8	3048.68	5.00833e-09	intronic	NPC1	.
HFO	24:35164199	C	T	14272.3	2730.02	5.54109e-07	intronic	USP14	.
HFO	24:58349255	C	T	16333.8	3041.58	2.86993e-07	intergenic	LMAN1,CCBE1	dist\x3d37762\x3bdist\x3d31989
HFO	24:58351661	G	A	14147.5	2768.19	9.44709e-07	intergenic	LMAN1,CCBE1	dist\x3d40168\x3bdist\x3d29583
HFO	24:60416966	C	A	16660.4	2901.43	4.88093e-08	intergenic	RNF152,PIGN	dist\x3d34836\x3bdist\x3d75643
HFO	25:15259170	A	T	13098.4	2517.83	6.23139e-07	intergenic	TRNAG-CCC,LOC100296255	dist\x3d557702\x3bdist\x3d68259
HFO	26:19842222	G	A	15789.9	3012.94	5.22563e-07	intronic	HPSE2	.
HFO	26:20584172	T	C	17373.9	2996.24	3.7077e-08	intergenic	NKX2-3,SLC25A28	dist\x3d49801\x3bdist\x3d12245
HFO	26:24016689	*	C	12131.1	2366.61	8.81914e-07	intronic	PDCD11	.
HFO	26:24606877	T	C	15792.3	2825.94	1.02415e-07	intronic	COL17A1	.
HFO	26:24671810	G	A	12845	2386.84	2.72071e-07	intergenic	COL17A1,SFR1	dist\x3d33547\x3bdist\x3d14788
HFO	26:25209683	G	A	15277.5	2694.16	6.90061e-08	intronic	SORCS3	.
HFO	26:25210690	T	C	16208	2760.03	2.58162e-08	intronic	SORCS3	.
HFO	26:25225333	T	C	17120.2	3277.07	5.63545e-07	intronic	SORCS3	.
HFO	26:26273073	C	T	14201.7	2624.51	2.36893e-07	intergenic	SORCS3,TRNAA-AGC	dist\x3d90561\x3bdist\x3d211366
HFO	26:27030551	A	C	15722.8	2857.61	1.54392e-07	intergenic	TRNAA-AGC,SORCS1	dist\x3d546041\x3bdist\x3d524326
HFO	26:27701343	A	G	11147.4	2158.37	7.39559e-07	intronic	SORCS1	.
HFO	26:27703998	T	C	12712.7	2357.68	2.59102e-07	intronic	SORCS1	.
HFO	26:27704024	G	A	13292.6	2407.4	1.40789e-07	intronic	SORCS1	.
HFO	26:28456046	T	C	16100	3065.4	4.95707e-07	intergenic	SORCS1,MIR2285K-4	dist\x3d326417\x3bdist\x3d710422
HFO	26:29837228	C	T	16701.5	3075.9	2.17096e-07	intergenic	MIR2285K-4,XPNPEP1	dist\x3d670688\x3bdist\x3d593236
HFO	26:29838617	G	A	15750.3	2992.45	4.7086e-07	intergenic	MIR2285K-4,XPNPEP1	dist\x3d672077\x3bdist\x3d591847
HFO	26:29939741	A	T	17295.1	3169.8	1.91735e-07	intergenic	MIR2285K-4,XPNPEP1	dist\x3d773201\x3bdist\x3d490723
HFO	26:32829690	T	C	17251.5	2835.32	8.98939e-09	intronic	TECTB	.
HFO	26:43306736	C	G	15951.9	2706.78	2.32839e-08	intergenic	BUB3,GPR26	dist\x3d346667\x3bdist\x3d112466
HFO	26:49578307	A	G	14730.1	2808.33	5.11973e-07	intergenic	GLRX3,TRNAC-ACA	dist\x3d154282\x3bdist\x3d337266
HFO	28:24799789	G	A	13723.7	2612.93	4.95565e-07	intronic	RUFY2	.
HFO	28:29319582	A	G	16367.1	3017.82	2.23606e-07	intronic	CFAP70	.
HFO	28:35080586	G	A	15491.5	2728.67	6.68116e-08	intergenic	ZCCHC24,ANXA11	dist\x3d30026\x3bdist\x3d38594
HFO	28:35541457	*	G	17042.3	2812.95	1.02411e-08	intronic	LOC101907929	.
HFO	28:35541458	*	G	17042.3	2812.95	1.02411e-08	intronic	LOC101907929	.
HFO	28:35641568	A	G	16945.8	3074.32	1.47272e-07	upstream	MBL1	.
HFO	28:35643219	C	T	17181.2	2917.82	2.38597e-08	intergenic	MBL1,SFTPA1	dist\x3d1963\x3bdist\x3d2625
HFO	28:43864779	T	C	14428.7	2816.93	8.9719e-07	intronic	OGDHL	.
HFO	29:19049556	A	G	14514	2799.44	6.75417e-07	intronic	LOC524642	.
HFO	29:23027050	G	T	19054.2	2903.48	7.73549e-10	intergenic	ANO5,NELL1	dist\x3d385136\x3bdist\x3d228742
HFO	29:27543531	C	T	13439.7	2627.81	9.2919e-07	intergenic	OR8G5,LOC100301297	dist\x3d5303\x3bdist\x3d25584
HFO	29:27543532	A	G	13439.7	2627.81	9.2919e-07	intergenic	OR8G5,LOC100301297	dist\x3d5304\x3bdist\x3d25583
HFO	29:27570092	C	A	14247.9	2696.01	4.26452e-07	upstream	LOC100301297	.
HFO	29:27585937	G	C	15605.2	2940.09	3.83571e-07	intergenic	LOC100301297,LOC788554	dist\x3d15890\x3bdist\x3d1322
HFO	29:27936130	A	G	12469.6	2406.01	6.81473e-07	upstream	LOC513334	.
HFO	29:28417866	A	G	14380.7	2681.67	2.97286e-07	intergenic	HEPACAM,CCDC15	dist\x3d18802\x3bdist\x3d1232
HFO	29:28594465	T	C	15044.2	2929.12	8.42365e-07	intergenic	TMEM218,PKNOX2	dist\x3d45557\x3bdist\x3d2175
HFO	29:39657767	T	C	15811.9	2845.02	1.18526e-07	intergenic	LOC617765,LOC521902	dist\x3d29894\x3bdist\x3d6472
HFO	29:39664520	C	A	14432	2766.51	5.83403e-07	intronic	LOC521902	.
HFO	29:47706261	A	G	17072.6	3186.66	3.04382e-07	intronic	SHANK2	.
HFO	29:47717634	G	A	18202.7	3372.24	2.52231e-07	intronic	SHANK2	.
HFO	29:47930568	A	G	15273.3	2941.05	6.49655e-07	intronic	SHANK2	.
POO	1:572893	G	A	-155235	29272.5	3.91917e-07	intronic	LOC618212	.
POO	1:112529413	G	A	87549.3	15938	1.61083e-07	intronic	MME	.
POO	1:137332683	A	G	93591.4	17499.7	3.17936e-07	intergenic	ACPP,TRNAC-ACA	dist\x3d38244\x3bdist\x3d263260
POO	1:142360920	C	T	65490.7	12173.9	2.74613e-07	intronic	UMODL1	.
POO	1:147127854	T	C	81739.4	14882.1	1.61567e-07	intronic	RUNX1	.
POO	1:156934066	T	C	74415.4	13893.4	3.06317e-07	intergenic	KCNH8,EFHB	dist\x3d90127\x3bdist\x3d190971
POO	2:17198573	C	T	70441.7	12416.2	6.80945e-08	intronic	ZNF385B	.
POO	2:131957270	T	G	89170.8	15803	7.89446e-08	intronic	KIF17	.
POO	2:134129732	G	A	75726.2	14631.6	7.04126e-07	intergenic	LOC536229,KLHDC7A	dist\x3d100003\x3bdist\x3d54606
POO	2:134183876	T	C	78144.7	13917.7	9.02472e-08	downstream	KLHDC7A	.
POO	2:134541216	G	C	71828.6	13979.7	8.34785e-07	intronic	IGSF21	.
POO	2:135912788	T	C	88825	15512.6	5.27924e-08	intergenic	ARHGEF19,EPHA2	dist\x3d1568\x3bdist\x3d32429
POO	3:34068354	A	G	72694.9	14047.5	7.05952e-07	intronic	SORT1	.
POO	3:35863644	A	G	75218.2	13984.1	2.75605e-07	intronic	NTNG1	.
POO	3:39559373	C	T	80167.1	15086	3.72629e-07	intergenic	NONE,LOC539383	dist\x3dNONE\x3bdist\x3d183781
POO	3:39562407	G	T	100464	14341.5	7.33757e-11	intergenic	NONE,LOC539383	dist\x3dNONE\x3bdist\x3d180747
POO	3:39566800	T	C	86238.2	15226.4	7.1326e-08	intergenic	NONE,LOC539383	dist\x3dNONE\x3bdist\x3d176354
POO	3:39585629	G	T	82787.3	14224.6	3.33875e-08	intergenic	NONE,LOC539383	dist\x3dNONE\x3bdist\x3d157525
POO	3:40589624	T	C	61045.2	11646.5	5.20627e-07	intergenic	COL11A1,OLFM3	dist\x3d58953\x3bdist\x3d682091
POO	3:40589928	T	C	66355.4	12299.7	2.55671e-07	intergenic	COL11A1,OLFM3	dist\x3d59257\x3bdist\x3d681787
POO	3:40604796	C	A	74014.4	13269.9	1.07796e-07	intergenic	COL11A1,OLFM3	dist\x3d74125\x3bdist\x3d666919
POO	3:42806425	A	G	65820	12650.6	6.21299e-07	intronic	CDC14A	.
POO	3:42821620	C	T	74385.2	13451.8	1.35397e-07	intronic	CDC14A	.
POO	3:42847891	T	C	71950.3	13935.5	7.45034e-07	intronic	CDC14A	.
POO	3:42859310	C	T	79124.3	14117.5	9.47177e-08	intronic	CDC14A	.
POO	3:42859350	*	A	77205.9	14588.6	4.1218e-07	intronic	CDC14A	.
POO	3:42859359	C	T	77808.7	14610.6	3.53264e-07	intronic	CDC14A	.
POO	3:42859365	T	G	73176.2	14268.3	8.71466e-07	intronic	CDC14A	.
POO	3:42859394	T	A	75515	14332.1	4.58876e-07	intronic	CDC14A	.
POO	3:42864300	G	A	68249.5	12652.2	2.56437e-07	intronic	CDC14A	.
POO	3:44123032	C	A	72489.4	14143.6	8.84706e-07	intergenic	PLPPR4,PLPPR5	dist\x3d146755\x3bdist\x3d95159
POO	3:89439515	G	A	74671.1	14336.2	6.05468e-07	intronic	FYB2	.
POO	3:105835869	C	T	84670.3	15975.8	3.97702e-07	intronic	ZMPSTE24	.
POO	4:1052190	C	G	89740.6	16075.7	1.05389e-07	intergenic	TRNAC-ACA,NONE	dist\x3d115930\x3bdist\x3dNONE
POO	4:13075234	C	T	80801.6	14504.9	1.11447e-07	intronic	DYNC1I1	.
POO	4:65577759	*	A	80180.1	13769.7	3.29111e-08	intronic	MINDY4	.
POO	5:41712048	T	G	79762.2	15107.8	4.3699e-07	intergenic	ABCD2,KIF21A	dist\x3d228542\x3bdist\x3d20622
POO	5:114720064	T	C	76737.6	14964.6	8.73976e-07	intronic	SAMM50	.
POO	6:37932891	G	A	86818.9	14848.2	2.92324e-08	intergenic	LCORL,SLIT2	dist\x3d375746\x3bdist\x3d1846384
POO	6:40159515	A	G	91287.7	16090.4	6.80742e-08	intronic	SLIT2	.
POO	6:44777570	C	T	84322.3	13971.8	1.15106e-08	intergenic	SEPSECS,PI4K2B	dist\x3d40668\x3bdist\x3d27947
POO	6:45916479	G	A	89990	15398.5	2.96716e-08	intergenic	RBPJ,CCKAR	dist\x3d28496\x3bdist\x3d3157
POO	6:46665758	T	C	66692.9	13056.8	9.56901e-07	intergenic	STIM2,TRNAS-GGA	dist\x3d209619\x3bdist\x3d1852188
POO	6:49491435	C	T	80701.6	14867.5	2.18884e-07	intergenic	TRNAS-GGA,PCDH7	dist\x3d973418\x3bdist\x3d462951
POO	6:77495980	T	A	76962.3	14959.9	8.1053e-07	intronic	ADGRL3	.
POO	6:77789352	T	C	74431.1	14497.2	8.49707e-07	intergenic	ADGRL3,TRNAC-GCA	dist\x3d130582\x3bdist\x3d949144
POO	6:93873898	A	G	72755.5	13726.4	3.96793e-07	intergenic	PAQR3,NAA11	dist\x3d196091\x3bdist\x3d156331
POO	6:106428624	C	A	79176.1	15265.9	6.6976e-07	intergenic	TRNAA-UGC,HS3ST1	dist\x3d354522\x3bdist\x3d74972
POO	7:13650223	A	G	79046.5	15309.8	7.44957e-07	UTR5	OR7D2	XM_002688769.5:c.-721C>T
POO	7:31040044	G	A	70359.1	13509.6	6.06776e-07	intronic	SNX2	.
POO	7:73988843	G	C	73750.1	13911.4	3.94933e-07	intergenic	GABRG2,CCNG1	dist\x3d87384\x3bdist\x3d1127102
POO	8:2215489	A	G	79648.1	15037.3	4.03662e-07	intergenic	LOC520638,GALNTL6	dist\x3d214987\x3bdist\x3d1724603
POO	8:34700252	A	G	88208.5	13713.1	1.5232e-09	intergenic	NONE,PTPRD	dist\x3dNONE\x3bdist\x3d1328395
POO	8:36803926	G	C	87132.1	15838.8	1.55047e-07	intergenic	PTPRD,DMAC1	dist\x3d200180\x3bdist\x3d291369
POO	8:36811418	A	G	83303.4	15118.9	1.48782e-07	intergenic	PTPRD,DMAC1	dist\x3d207672\x3bdist\x3d283877
POO	8:37104872	T	A	79097.9	15024.7	4.68305e-07	intergenic	DMAC1,TRNAC-GCA	dist\x3d7511\x3bdist\x3d618830
POO	8:38699456	G	A	80789.7	15188.5	3.63813e-07	intronic	KIAA2026	.
POO	8:42667894	C	T	76831.8	14927.4	8.01434e-07	intergenic	SMARCA2,TRNAE-UUC	dist\x3d118360\x3bdist\x3d108738
POO	8:63007174	A	G	75388.5	13170.2	5.32555e-08	intergenic	XPA,FOXE1	dist\x3d98432\x3bdist\x3d45299
POO	8:65268874	T	C	67990.1	12844.3	4.09832e-07	exonic	INVS	.
POO	8:65988980	G	A	67529.2	13167.9	8.7247e-07	intronic	CNTNAP3	.
POO	8:67240373	T	C	77609.6	14323.8	2.29184e-07	intronic	SLC18A1	.
POO	8:67492485	C	T	88205.9	15397.6	5.21431e-08	intergenic	LZTS1,TRNAC-GCA	dist\x3d63606\x3bdist\x3d367033
POO	8:67492490	A	G	88205.9	15397.6	5.21431e-08	intergenic	LZTS1,TRNAC-GCA	dist\x3d63611\x3bdist\x3d367028
POO	8:67492496	A	G	92504.7	15473.1	1.52771e-08	intergenic	LZTS1,TRNAC-GCA	dist\x3d63617\x3bdist\x3d367022
POO	8:67492507	T	C	90454.9	14301.1	2.6499e-09	intergenic	LZTS1,TRNAC-GCA	dist\x3d63628\x3bdist\x3d367011
POO	8:67492520	C	A	81456.1	15179.3	2.92256e-07	intergenic	LZTS1,TRNAC-GCA	dist\x3d63641\x3bdist\x3d366998
POO	8:69437189	T	C	81648.5	15853.1	7.89593e-07	intronic	HR	.
POO	8:112482674	A	G	79227.5	14105.2	8.93331e-08	intergenic	TMEM18,ALKAL2	dist\x3d5347\x3bdist\x3d256777
POO	9:37308510	*	A	86597.5	13504.5	1.68869e-09	intergenic	MIR2479,LAMA4	dist\x3d266535\x3bdist\x3d867572
POO	9:37308511	*	A	86597.5	13504.5	1.68869e-09	intergenic	MIR2479,LAMA4	dist\x3d266536\x3bdist\x3d867571
POO	9:37342800	T	C	73619.6	13977.7	4.63163e-07	intergenic	MIR2479,LAMA4	dist\x3d300825\x3bdist\x3d833282
POO	9:37401598	T	C	76561.4	13920.2	1.55906e-07	intergenic	MIR2479,LAMA4	dist\x3d359623\x3bdist\x3d774484
POO	9:37424376	G	T	85332.8	15053.7	6.96915e-08	intergenic	MIR2479,LAMA4	dist\x3d382401\x3bdist\x3d751706
POO	9:46289489	T	A	80392.6	15630	8.1452e-07	intergenic	TRNAM-CAU,GRIK2	dist\x3d101473\x3bdist\x3d1598210
POO	9:81247038	T	G	87916.8	16149.9	2.0326e-07	intronic	PHACTR2	.
POO	9:82604106	A	G	71238.8	13874.1	8.47769e-07	intergenic	LOC100294980,EPM2A	dist\x3d267405\x3bdist\x3d317307
POO	9:104428080	A	G	71511.7	13480.9	3.89079e-07	intergenic	LOC100301231,TRNAY-GUA	dist\x3d4752\x3bdist\x3d44012
POO	11:5473340	C	T	80613.6	13986.2	4.39329e-08	intronic	LONRF2	.
POO	11:5521683	A	C	86258	15827.3	1.97462e-07	intronic	CHST10	.
POO	11:32089477	C	A	85889.2	16619.7	7.28858e-07	intergenic	FSHR,NRXN1	dist\x3d638940\x3bdist\x3d185922
POO	11:45788498	A	G	81821	15992.4	9.21536e-07	intergenic	UXS1,C11H2orf40	dist\x3d9935\x3bdist\x3d40517
POO	11:45812094	C	G	81811	15437	3.98182e-07	intergenic	UXS1,C11H2orf40	dist\x3d33531\x3bdist\x3d16921
POO	11:45814885	G	A	78102.3	13437.7	3.46889e-08	intergenic	UXS1,C11H2orf40	dist\x3d36322\x3bdist\x3d14130
POO	11:45814903	C	T	79917.1	14257	9.43633e-08	intergenic	UXS1,C11H2orf40	dist\x3d36340\x3bdist\x3d14112
POO	11:54999900	*	T	77230.2	14830.4	6.08232e-07	intronic	CTNNA2	.
POO	11:87308242	A	G	75355.6	14693.5	8.71686e-07	intronic	HPCAL1	.
POO	11:92068258	A	G	74058.6	13395.9	1.36242e-07	intergenic	TRNAS-ACU,LOC525099	dist\x3d601864\x3bdist\x3d167202
POO	11:92670821	T	A	96153.3	15237.6	2.85823e-09	intronic	DAB2IP	.
POO	11:93765483	A	C	73411.1	12957.2	7.06683e-08	intergenic	OR1B1,OR1L1	dist\x3d3547\x3bdist\x3d25600
POO	12:7975727	T	C	78310.4	15111.8	6.83373e-07	intergenic	NONE,LOC101905933	dist\x3dNONE\x3bdist\x3d1064909
POO	12:8092171	G	A	72419.5	13906.6	6.08273e-07	intergenic	NONE,LOC101905933	dist\x3dNONE\x3bdist\x3d948465
POO	12:8432085	A	G	84645.8	15818.6	3.13771e-07	intergenic	NONE,LOC101905933	dist\x3dNONE\x3bdist\x3d608551
POO	12:27088852	C	A	78033.2	15153.3	7.92195e-07	intergenic	TRNAC-GCA,RFC3	dist\x3d513224\x3bdist\x3d290064
POO	12:27701309	G	T	78691.9	14502.2	2.20797e-07	intronic	STARD13	.
POO	12:49814626	T	C	61842.2	11930.2	6.78397e-07	intergenic	KLF12,TRNAY-AUA	dist\x3d1011789\x3bdist\x3d371583
POO	12:49866012	G	A	72006.4	13129.8	1.68027e-07	intergenic	KLF12,TRNAY-AUA	dist\x3d1063175\x3bdist\x3d320197
POO	12:49866022	T	C	72006.4	13129.8	1.68027e-07	intergenic	KLF12,TRNAY-AUA	dist\x3d1063185\x3bdist\x3d320187
POO	12:50397620	A	G	67368.8	13147.5	8.89392e-07	intronic	TBC1D4	.
POO	12:50427639	A	G	80216.5	15308.4	5.24118e-07	intronic	TBC1D4	.
POO	13:2163950	G	A	90534.6	16112.9	8.85354e-08	intronic	PLCB4	.
POO	13:2467110	A	G	79846.4	14608	1.83144e-07	intronic	PLCB4	.
POO	13:3235949	A	G	75947.3	14663.3	6.91742e-07	intergenic	PAK5,ANKEF1	dist\x3d247033\x3bdist\x3d16197
POO	13:14442183	T	C	86619.8	15544.9	1.10618e-07	intergenic	CELF2,GATA3	dist\x3d1257320\x3bdist\x3d1463119
POO	13:15887927	T	C	89383.3	15613.5	5.31137e-08	intergenic	NONE,GATA3	dist\x3dNONE\x3bdist\x3d17375
POO	13:30880731	T	C	65493.6	12642.8	6.88803e-07	intergenic	MINDY3,PTER	dist\x3d480845\x3bdist\x3d38372
POO	13:36639669	T	A	76919.7	14278.6	2.65214e-07	intronic	ARMC4	.
POO	13:36657816	C	T	77255.6	14701.1	4.8913e-07	intronic	ARMC4	.
POO	13:36657818	T	A	77255.6	14701.1	4.8913e-07	intronic	ARMC4	.
POO	13:45281950	G	A	69525.2	12317.2	7.8221e-08	intergenic	PFKP,ADARB2	dist\x3d121134\x3bdist\x3d757743
POO	13:45281964	C	T	69525.2	12317.2	7.8221e-08	intergenic	PFKP,ADARB2	dist\x3d121148\x3bdist\x3d757729
POO	13:45282046	T	C	65307.2	12539	6.06109e-07	intergenic	PFKP,ADARB2	dist\x3d121230\x3bdist\x3d757647
POO	13:45282591	C	T	64090.1	11962.4	3.04262e-07	intergenic	PFKP,ADARB2	dist\x3d121775\x3bdist\x3d757102
POO	13:46941224	T	C	83330.9	13899.7	1.40537e-08	intergenic	ZMYND11,PRNP	dist\x3d28604\x3bdist\x3d98713
POO	13:47112446	A	G	76706.7	14008.2	1.74766e-07	intergenic	PRND,RASSF2	dist\x3d21401\x3bdist\x3d18682
POO	13:47249564	C	G	70422.7	13732.8	8.73461e-07	intronic	SLC23A2	.
POO	13:47524610	A	G	86212.6	14473.1	1.70119e-08	intergenic	CDS2,LOC787679	dist\x3d25894\x3bdist\x3d21707
POO	13:47545559	T	C	85732	14726.8	3.31406e-08	downstream	LOC787679	.
POO	13:47572546	T	C	82890.4	14688.3	7.86963e-08	intergenic	PROKR2,GPCPD1	dist\x3d11925\x3bdist\x3d144811
POO	13:73454864	T	C	86263.2	16059.2	2.85098e-07	intronic	STK4	.
POO	13:74147801	T	C	87977.9	15172	3.70514e-08	intronic	TKDP2	.
POO	13:81496682	G	A	77592.6	14309	2.24494e-07	intergenic	BCAS1,CYP24A1	dist\x3d5799\x3bdist\x3d95500
POO	14:47219872	C	T	78328.4	14084.6	1.16545e-07	intergenic	SLC30A8,AARD	dist\x3d69326\x3bdist\x3d118637
POO	14:50477166	G	T	80444.6	15621.4	7.92003e-07	intergenic	TRPS1,CSMD3	dist\x3d1568167\x3bdist\x3d328615
POO	14:50502032	A	C	80617.8	15083	3.22744e-07	intergenic	TRPS1,CSMD3	dist\x3d1593033\x3bdist\x3d303749
POO	14:53891845	A	G	81089.9	15290.2	3.9135e-07	intergenic	TRNAC-ACA,KCNV1	dist\x3d475040\x3bdist\x3d595131
POO	14:54980148	T	C	87936.8	14480.4	9.53129e-09	intronic	PKHD1L1	.
POO	14:56203982	G	A	84051.1	15692.4	3.06315e-07	intergenic	EMC2,EIF3E	dist\x3d180155\x3bdist\x3d41973
POO	14:81818946	T	C	78087.2	15028.6	6.41527e-07	intronic	MTBP	.
POO	14:81831567	A	G	81323.9	15407.3	4.39526e-07	intronic	MTBP	.
POO	14:81849683	A	G	88504.4	14870.5	1.74462e-08	intronic	MTBP	.
POO	14:81856429	C	A	73901.9	14447.3	9.25467e-07	intronic	MTBP	.
POO	14:81867615	A	G	77735.9	14911	5.92363e-07	intergenic	MTBP,SNTB1	dist\x3d2907\x3bdist\x3d2947
POO	15:84093055	T	A	76576.2	14561.9	4.81054e-07	intergenic	LOC100271685,OR4A15	dist\x3d159077\x3bdist\x3d62022
POO	16:31568420	G	A	84787.6	16276.5	6.03698e-07	intronic	SMYD3	.
POO	16:31568426	A	G	84787.6	16276.5	6.03698e-07	intronic	SMYD3	.
POO	16:49559241	C	G	81655.4	15897.2	8.40824e-07	intronic	ARHGEF16	.
POO	16:52141387	T	C	75540.1	14439	5.44649e-07	intronic	FHAD1	.
POO	16:72697905	T	C	78290.2	14998.3	5.74764e-07	intronic	HHAT	.
POO	17:660479	T	A	70604.9	13101.9	2.62917e-07	intronic	CPE	.
POO	18:37853973	T	C	67804.6	13066.6	6.61579e-07	intergenic	PSMD7,ZFHX3	dist\x3d864100\x3bdist\x3d266607
POO	18:46586446	G	A	79162.5	14735.9	2.84417e-07	intronic	NFKBID	.
POO	18:46960907	*	G	65941.9	12565.8	5.05869e-07	intronic	ZNF382	.
POO	18:47166100	T	C	72969.4	13587.7	2.86882e-07	intronic	LOC101907883	.
POO	18:65790939	T	C	75797.2	14099.8	2.79566e-07	intronic	MZF1	.
POO	19:44648987	G	T	72761.8	14249.1	9.63439e-07	intronic	KIF18B	.
POO	19:54773678	A	G	72239.7	14113.8	9.12688e-07	intergenic	SEC14L1,MIR6516	dist\x3d18010\x3bdist\x3d24946
POO	19:60168756	G	C	88200.6	14411.6	7.51433e-09	intergenic	TRNAG-UCC,KCNJ2	dist\x3d1059969\x3bdist\x3d439789
POO	19:60168819	G	C	75578.6	13562.3	1.1036e-07	intergenic	TRNAG-UCC,KCNJ2	dist\x3d1060032\x3bdist\x3d439726
POO	19:60168821	T	A	68138.6	13229.6	7.89069e-07	intergenic	TRNAG-UCC,KCNJ2	dist\x3d1060034\x3bdist\x3d439724
POO	19:60170766	C	T	72543.2	13989.4	6.72533e-07	intergenic	TRNAG-UCC,KCNJ2	dist\x3d1061979\x3bdist\x3d437779
POO	20:774699	G	T	70076.6	12807.4	1.78334e-07	intronic	SLIT3	.
POO	20:774710	A	G	68672.6	12631.3	2.10152e-07	intronic	SLIT3	.
POO	20:1049957	T	C	88602.6	13689.6	1.23869e-09	intronic	SLIT3	.
POO	20:1050011	C	T	79678.9	13139.5	9.96031e-09	intronic	SLIT3	.
POO	20:1067319	T	A	83888.5	13585.7	5.70143e-09	intronic	SLIT3	.
POO	20:66303305	A	G	69175.5	13450.9	8.1703e-07	intergenic	LOC104969118,PAPD7	dist\x3d61213\x3bdist\x3d146717
POO	20:68253827	C	T	70749.7	12870.1	1.57975e-07	intergenic	LOC101902976,IRX1	dist\x3d175011\x3bdist\x3d1076390
POO	20:68850728	T	C	72207.2	13767.8	5.13111e-07	intergenic	LOC101902976,IRX1	dist\x3d771912\x3bdist\x3d479489
POO	21:42112199	T	C	83206.6	15674.9	3.82625e-07	intronic	NUBPL	.
POO	21:43346130	C	T	84624.7	16365.6	7.19075e-07	intronic	NPAS3	.
POO	23:1271768	*	G	95119.6	15943.6	1.6247e-08	intergenic	KHDRBS2,PRIM2	dist\x3d310542\x3bdist\x3d1288776
POO	23:1320892	A	T	82483.6	14093	2.84237e-08	intergenic	KHDRBS2,PRIM2	dist\x3d359666\x3bdist\x3d1239652
POO	23:39455472	C	T	74969.1	13661.6	1.65351e-07	downstream	TPMT	.
POO	23:39455537	A	G	83865.9	14298	2.66973e-08	downstream	TPMT	.
POO	23:45512625	T	G	87736.4	17073.3	8.32032e-07	intronic	LOC100848875,LOC520336	.
POO	23:47254437	T	C	84987.9	13764.1	5.70565e-09	intergenic	TRNAQ-CUG,EEF1E1	dist\x3d11370\x3bdist\x3d112825
POO	23:47256898	T	C	73501.7	14078.2	5.72097e-07	intergenic	TRNAQ-CUG,EEF1E1	dist\x3d13831\x3bdist\x3d110364
POO	24:16991352	A	G	73443	13865	4.03113e-07	intergenic	NONE,TRNAK-UUU	dist\x3dNONE\x3bdist\x3d311664
POO	24:24239268	T	A	65147.9	11846.1	1.56267e-07	intergenic	CCDC178,KLHL14	dist\x3d42680\x3bdist\x3d143415
POO	24:28958497	A	G	85280.2	14207.8	1.35593e-08	intergenic	CDH2,CHST9	dist\x3d54382\x3bdist\x3d730326
POO	24:28981919	A	G	84553.4	15017.9	8.38166e-08	intergenic	CDH2,CHST9	dist\x3d77804\x3bdist\x3d706904
POO	24:28981978	A	G	70454.9	13759.4	9.03931e-07	intergenic	CDH2,CHST9	dist\x3d77863\x3bdist\x3d706845
POO	24:33096991	A	G	93195.3	15948.3	2.97421e-08	intronic	NPC1	.
POO	24:47158129	C	T	86730.1	16769.8	7.16072e-07	intergenic	SKOR2,SMAD2	dist\x3d213075\x3bdist\x3d334553
POO	24:60416966	C	A	83320.4	15135.9	1.52393e-07	intergenic	RNF152,PIGN	dist\x3d34836\x3bdist\x3d75643
POO	25:15259170	A	T	75355.9	12746.5	2.12471e-08	intergenic	TRNAG-CCC,LOC100296255	dist\x3d557702\x3bdist\x3d68259
POO	26:20584172	T	C	87144	15598.3	1.03195e-07	intergenic	NKX2-3,SLC25A28	dist\x3d49801\x3bdist\x3d12245
POO	26:22968844	T	C	81833.6	15662.6	5.62147e-07	intronic	GBF1	.
POO	26:24016689	*	C	63430.5	12217.5	6.53735e-07	intronic	PDCD11	.
POO	26:24606877	T	C	82311.6	14593.2	7.97953e-08	intronic	COL17A1	.
POO	26:24664866	C	A	77055.9	13599.6	7.05434e-08	intergenic	COL17A1,SFR1	dist\x3d26603\x3bdist\x3d21732
POO	26:24671810	G	A	63898.5	12441.5	8.42901e-07	intergenic	COL17A1,SFR1	dist\x3d33547\x3bdist\x3d14788
POO	26:25206535	G	C	71016.2	13733.2	7.18332e-07	intronic	SORCS3	.
POO	26:25209683	G	A	81570.1	13838.3	2.31482e-08	intronic	SORCS3	.
POO	26:25210690	T	C	84032.4	14267.7	2.37047e-08	intronic	SORCS3	.
POO	26:25225333	T	C	94365.3	16743.3	8.15078e-08	intronic	SORCS3	.
POO	26:26273073	C	T	73878.4	13559.4	1.98828e-07	intergenic	SORCS3,TRNAA-AGC	dist\x3d90561\x3bdist\x3d211366
POO	26:27030551	A	C	82840	14724.9	8.55884e-08	intergenic	TRNAA-AGC,SORCS1	dist\x3d546041\x3bdist\x3d524326
POO	26:28456046	T	C	86309.1	15842.3	1.99264e-07	intergenic	SORCS1,MIR2285K-4	dist\x3d326417\x3bdist\x3d710422
POO	26:29838617	G	A	80317.8	15516.6	7.01795e-07	intergenic	MIR2285K-4,XPNPEP1	dist\x3d672077\x3bdist\x3d591847
POO	26:29939741	A	T	86623.2	16493.9	4.96467e-07	intergenic	MIR2285K-4,XPNPEP1	dist\x3d773201\x3bdist\x3d490723
POO	26:30399645	T	C	81260.9	15721	7.25468e-07	intergenic	MIR2285K-4,XPNPEP1	dist\x3d1233105\x3bdist\x3d30819
POO	26:32829690	T	C	89320.2	14661.2	8.64387e-09	intronic	TECTB	.
POO	26:39093990	A	C	85977	16033.8	2.97787e-07	intergenic	CACUL1,TRNAG-CCC	dist\x3d76594\x3bdist\x3d4720
POO	26:43306736	C	G	78217.2	14160	1.39268e-07	intergenic	BUB3,GPR26	dist\x3d346667\x3bdist\x3d112466
POO	26:49578307	A	G	75935.9	14533.8	5.62153e-07	intergenic	GLRX3,TRNAC-ACA	dist\x3d154282\x3bdist\x3d337266
POO	27:44778358	A	C	72344.7	14016.3	7.50603e-07	intergenic	TRNAW-CCA,TRNAG-GCC	dist\x3d248447\x3bdist\x3d1254
POO	28:29319582	A	G	81781.3	15719.4	6.2224e-07	intronic	CFAP70	.
POO	28:35080586	G	A	77461.9	14210.1	1.96305e-07	intergenic	ZCCHC24,ANXA11	dist\x3d30026\x3bdist\x3d38594
POO	28:35487273	C	A	87828.4	17041.2	7.76975e-07	UTR5	LOC112444733	XM_024986863.1:c.-1061A>C
POO	28:35541457	*	G	83633.9	14722.2	6.56934e-08	intronic	LOC101907929	.
POO	28:35541458	*	G	83633.9	14722.2	6.56934e-08	intronic	LOC101907929	.
POO	28:35641568	A	G	85462.2	15978.5	3.17356e-07	upstream	MBL1	.
POO	28:35643219	C	T	84891.9	15240.3	1.1168e-07	intergenic	MBL1,SFTPA1	dist\x3d1963\x3bdist\x3d2625
POO	28:41496829	A	G	79748.1	14834.5	2.79446e-07	intronic	BMPR1A	.
POO	29:23027050	G	T	100080	14951.2	3.87872e-10	intergenic	ANO5,NELL1	dist\x3d385136\x3bdist\x3d228742
POO	29:26861838	A	C	79015.6	15036.2	4.89218e-07	intergenic	LOC782329,LOC782288	dist\x3d9421\x3bdist\x3d2299
POO	29:27500195	C	T	62683.2	12249.3	9.1714e-07	intergenic	LOC513062,LOC782009	dist\x3d6948\x3bdist\x3d2876
POO	29:27543521	G	A	68013.4	13179.8	7.54121e-07	intergenic	OR8G5,LOC100301297	dist\x3d5293\x3bdist\x3d25594
POO	29:27543531	C	T	73913	13439	1.5599e-07	intergenic	OR8G5,LOC100301297	dist\x3d5303\x3bdist\x3d25584
POO	29:27543532	A	G	73913	13439	1.5599e-07	intergenic	OR8G5,LOC100301297	dist\x3d5304\x3bdist\x3d25583
POO	29:27570092	C	A	75949.3	13865	1.73181e-07	upstream	LOC100301297	.
POO	29:27575441	T	G	82234.7	14988.2	1.66088e-07	intergenic	LOC100301297,LOC788554	dist\x3d5394\x3bdist\x3d11818
POO	29:27585937	G	C	89627.4	14876.8	1.2133e-08	intergenic	LOC100301297,LOC788554	dist\x3d15890\x3bdist\x3d1322
POO	29:27715468	T	C	88086.7	16776.3	4.99147e-07	intergenic	LOC782544,LOC511657	dist\x3d4481\x3bdist\x3d12510
POO	29:27930589	T	C	67732.1	12467	2.13926e-07	downstream	LOC513333	.
POO	29:27936130	A	G	66630	12370.6	2.66344e-07	upstream	LOC513334	.
POO	29:28046793	A	G	74759.2	14470.4	7.34117e-07	intergenic	LOC783205,LOC505546	dist\x3d10935\x3bdist\x3d6757
POO	29:28413185	C	A	74408.7	14569.2	9.59636e-07	intergenic	HEPACAM,CCDC15	dist\x3d14121\x3bdist\x3d5913
POO	29:28417866	A	G	75734.5	13948.8	2.17424e-07	intergenic	HEPACAM,CCDC15	dist\x3d18802\x3bdist\x3d1232
POO	29:28594465	T	C	81596.4	15019.3	2.14074e-07	intergenic	TMEM218,PKNOX2	dist\x3d45557\x3bdist\x3d2175
POO	29:39657767	T	C	78864.8	14818.7	3.59095e-07	intergenic	LOC617765,LOC521902	dist\x3d29894\x3bdist\x3d6472
POO	29:39658875	T	C	76493.4	14379.3	3.62895e-07	intergenic	LOC617765,LOC521902	dist\x3d31002\x3bdist\x3d5364
POO	29:39659461	C	T	78413	14668.7	3.21763e-07	intergenic	LOC617765,LOC521902	dist\x3d31588\x3bdist\x3d4778
POO	29:39659878	A	G	77399.7	14887.6	6.32709e-07	intergenic	LOC617765,LOC521902	dist\x3d32005\x3bdist\x3d4361
POO	29:39664520	C	A	79729.4	14128.5	7.87559e-08	intronic	LOC521902	.
POO	29:47706261	A	G	84730.1	16604.1	9.78557e-07	intronic	SHANK2	.
POO	29:47707586	A	G	74356.2	14448.7	8.04448e-07	intronic	SHANK2	.
POO	29:47717392	T	C	79959.9	15437.9	6.91585e-07	intronic	SHANK2	.
POO	29:47717634	G	A	89889.8	17588.1	9.44323e-07	intronic	SHANK2	.
MHO	1:73965050	A	T	10.1729	1.92832	4.45104e-07	intronic	ATP13A4	.
MHO	3:57063705	T	C	-9.07788	1.71464	4.08113e-07	intronic	HS2ST1	.
MHO	3:118253091	T	C	-8.51678	1.66865	9.73986e-07	intronic	HDAC4	.
MHO	3:118254036	G	A	-8.73772	1.70737	9.15634e-07	intronic	HDAC4	.
MHO	5:119153167	A	G	10.037	1.95089	8.09615e-07	intergenic	LOC531175,BRD1	dist\x3d6753\x3bdist\x3d53337
MHO	7:60774685	G	A	8.99463	1.69542	3.8801e-07	intronic	IL17B	.
MHO	10:43745620	A	G	-8.97139	1.69008	3.82644e-07	intronic	ABHD12B,PYGL	.
MHO	11:2158453	G	C	9.05428	1.73622	5.88075e-07	intronic	FAHD2A	.
MHO	11:84256799	T	C	12.5887	2.31472	2.08368e-07	intergenic	LOC782101,TRIB2	dist\x3d165056\x3bdist\x3d980302
MHO	14:71085223	C	T	8.55935	1.58672	2.56289e-07	intergenic	FAM92A,TRIQK	dist\x3d496629\x3bdist\x3d218288
MHO	26:16947503	T	A	11.3738	2.22554	9.45349e-07	intronic	SORBS1	.
MHO	26:16949580	T	C	11.736	2.26363	6.75596e-07	intronic	SORBS1	.
MHO	26:19045456	G	A	11.458	2.20243	6.22694e-07	intronic	CRTAC1	.
MHO	26:19046797	G	C	11.3372	2.20383	8.11366e-07	intronic	CRTAC1	.
MHO	26:19047828	A	G	11.6563	2.21354	4.65339e-07	intronic	CRTAC1	.
MHO	26:20888082	T	C	10.9788	2.05382	3.21848e-07	intronic	DNMBP	.
MHO	26:21452299	G	A	9.50756	1.86228	9.68119e-07	intergenic	HIF1AN,PAX2	dist\x3d20484\x3bdist\x3d137431
MHO	26:25870838	T	C	12.8256	2.49438	8.20729e-07	intronic	SORCS3	.
MHO	26:26101535	C	T	12.2504	2.09432	2.89149e-08	intronic	SORCS3	.
MHO	28:9778071	A	G	9.32173	1.80212	7.13336e-07	intronic	RYR2	.
MHO	28:26191308	A	G	14.0721	2.67513	4.77393e-07	intronic	COL13A1	.
MHO	28:26191331	G	T	12.7742	2.44006	5.35938e-07	intronic	COL13A1	.
HSO	1:153100049	T	C	-5.95635	1.11181	3.0469e-07	intergenic	ANKRD28,GALNT15	dist\x3d183588\x3bdist\x3d79257
HSO	5:36016917	G	A	8.091	1.54892	5.65084e-07	intronic	TMEM117	.
HSO	5:44799181	C	T	8.22979	1.48191	1.20949e-07	intergenic	LOC107132485,CPM	dist\x3d117474\x3bdist\x3d77388
HSO	5:71728649	C	T	8.47459	1.56422	2.29691e-07	intronic	MGC137014	.
HSO	5:113356123	T	C	9.57552	1.68152	6.14632e-08	intergenic	NFAM1,SERHL2	dist\x3d8332\x3bdist\x3d61007
HSO	5:116135788	T	C	8.93398	1.61393	1.31722e-07	intronic	ATXN10	.
HSO	5:116214683	A	G	8.90469	1.74433	9.69837e-07	intergenic	ATXN10,WNT7B	dist\x3d45288\x3bdist\x3d15622
HSO	5:116991292	C	A	5.16678	1.00565	8.35983e-07	intronic	TBC1D22A	.
HSO	5:117918304	A	G	6.78363	1.22252	1.2362e-07	intergenic	MIR2285O-5,FAM19A5	dist\x3d684110\x3bdist\x3d386531
HSO	5:119055842	T	G	6.31664	1.23452	9.19612e-07	intergenic	FAM19A5,LOC531175	dist\x3d574174\x3bdist\x3d87209
HSO	7:5393706	C	T	6.00382	1.17449	9.39883e-07	intronic	FCHO1	.
HSO	7:19068825	G	A	-5.74294	1.12263	9.24113e-07	intergenic	PTPRS,KDM4B	dist\x3d21533\x3bdist\x3d26645
HSO	7:32824371	A	G	8.35691	1.63558	9.50172e-07	intergenic	FAM170A,NONE	dist\x3d37165\x3bdist\x3dNONE
HSO	7:49579332	A	G	-5.75554	1.08378	3.78463e-07	intronic	NME5	.
HSO	7:50758517	G	A	-5.27358	0.992519	3.73766e-07	intergenic	TMEM173,UBE2D2	dist\x3d15506\x3bdist\x3d30890
HSO	7:50844981	A	T	-5.55806	1.08242	8.46999e-07	intergenic	UBE2D2,CXXC5	dist\x3d12250\x3bdist\x3d7084
HSO	7:54790543	G	A	7.2881	1.35453	2.73405e-07	intergenic	NR3C1,TRNAC-GCA	dist\x3d298680\x3bdist\x3d438183
HSO	7:57619835	A	G	5.43373	1.0272	4.167e-07	intergenic	POU4F3,TCERG1	dist\x3d82401\x3bdist\x3d26743
HSO	7:57752093	G	A	-5.06563	0.979698	7.20016e-07	intergenic	GPR151,PPP2R2B	dist\x3d47787\x3bdist\x3d44101
HSO	7:57754315	A	G	5.12278	0.925145	1.3065e-07	intergenic	GPR151,PPP2R2B	dist\x3d50009\x3bdist\x3d41879
HSO	7:57754358	C	T	4.9342	0.926782	3.55709e-07	intergenic	GPR151,PPP2R2B	dist\x3d50052\x3bdist\x3d41836
HSO	7:57776500	G	A	-5.31205	1.00167	3.91709e-07	intergenic	GPR151,PPP2R2B	dist\x3d72194\x3bdist\x3d19694
HSO	7:57783927	T	*	-5.00663	0.971317	7.74823e-07	intergenic	GPR151,PPP2R2B	dist\x3d79621\x3bdist\x3d12267
HSO	7:64133541	C	T	6.55538	1.03311	2.38785e-09	intergenic	NMUR2,GRIA1	dist\x3d479659\x3bdist\x3d638270
HSO	8:107241373	C	T	5.21323	1.0183	9.07907e-07	intergenic	TLR4,BRINP1	dist\x3d172531\x3bdist\x3d1395708
HSO	8:107285435	G	C	5.43853	1.0453	6.21509e-07	intergenic	TLR4,BRINP1	dist\x3d216593\x3bdist\x3d1351646
HSO	8:107646387	G	A	5.71095	0.952996	1.42324e-08	intergenic	TLR4,BRINP1	dist\x3d577545\x3bdist\x3d990694
HSO	8:107646487	A	G	5.44075	0.977828	1.14976e-07	intergenic	TLR4,BRINP1	dist\x3d577645\x3bdist\x3d990594
HSO	10:77806737	A	G	6.40029	1.17046	1.81217e-07	intronic	FUT8	.
HSO	14:71461709	G	A	7.60564	1.45192	5.28224e-07	intronic	TRIQK	.
HSO	15:82222682	G	A	5.52399	1.00203	1.46743e-07	intergenic	GLYATL2,FAM111B	dist\x3d29870\x3bdist\x3d20509
HSO	17:7924075	T	C	7.67652	1.50439	9.79529e-07	intergenic	TRNAE-UUC,IQCM	dist\x3d129541\x3bdist\x3d119342
HSO	17:9069171	C	G	6.49748	1.24435	5.70377e-07	intergenic	TRNAC-GCA,NR3C2	dist\x3d378922\x3bdist\x3d512213
HSO	21:7455710	C	T	-4.88117	0.941819	6.8139e-07	intronic	TTC23	.
HSO	26:24013890	C	G	6.31435	1.13015	1.02997e-07	intronic	PDCD11	.
PNO	1:68758631	A	G	14.5172	2.81224	7.48233e-07	intronic	KALRN	.
PNO	2:96819377	T	C	10.9368	2.08001	4.8244e-07	intergenic	PTH2R,LOC112442978	dist\x3d67594\x3bdist\x3d225872
PNO	2:105125755	T	*	13.0099	2.2986	7.26489e-08	intergenic	TNP1,TRNAC-ACA	dist\x3d265394\x3bdist\x3d739976
PNO	3:23513331	G	A	14.7337	2.83687	6.48215e-07	intergenic	REG4,HMGCS2	dist\x3d5285\x3bdist\x3d23260
PNO	5:4096200	C	T	14.3918	2.67708	2.79381e-07	intergenic	ATXN7L3B,LOC523590	dist\x3d23929\x3bdist\x3d62277
PNO	5:44799181	C	T	15.3378	2.90373	4.31816e-07	intergenic	LOC107132485,CPM	dist\x3d117474\x3bdist\x3d77388
PNO	5:66724588	C	T	13.0076	2.42293	2.89183e-07	intergenic	PAH,ASCL1	dist\x3d20960\x3bdist\x3d7881
PNO	5:67565654	T	C	15.7988	2.94823	3.02671e-07	intronic	LOC505479	.
PNO	5:68036058	A	G	14.9279	2.90246	8.15607e-07	intergenic	TXNRD1,CHST11	dist\x3d74084\x3bdist\x3d8464
PNO	5:71723671	A	T	15.821	2.72218	3.47373e-08	intergenic	MGC137211,MGC137014	dist\x3d11293\x3bdist\x3d3314
PNO	5:71728514	T	C	15.4307	2.89386	3.42381e-07	intronic	MGC137014	.
PNO	5:71728649	C	T	20.6318	2.86822	2.63658e-11	intronic	MGC137014	.
PNO	5:71732605	A	C	15.0369	2.81387	3.2436e-07	upstream	MGC137014	.
PNO	5:71733797	T	C	16.6891	3.04555	1.71514e-07	intergenic	MGC137014,LARGE1	dist\x3d1427\x3bdist\x3d72373
PNO	5:71733798	G	A	16.6891	3.04555	1.71514e-07	intergenic	MGC137014,LARGE1	dist\x3d1428\x3bdist\x3d72372
PNO	5:71733839	C	T	16.2422	3.06742	4.06729e-07	intergenic	MGC137014,LARGE1	dist\x3d1469\x3bdist\x3d72331
PNO	5:71733870	C	T	14.4804	2.83462	9.54676e-07	intergenic	MGC137014,LARGE1	dist\x3d1500\x3bdist\x3d72300
PNO	5:71735017	G	T	13.0656	2.56174	9.9035e-07	intergenic	MGC137014,LARGE1	dist\x3d2647\x3bdist\x3d71153
PNO	5:71735215	G	T	16.8495	2.97913	7.4086e-08	intergenic	MGC137014,LARGE1	dist\x3d2845\x3bdist\x3d70955
PNO	5:71736086	A	G	19.6143	3.49908	9.43248e-08	intergenic	MGC137014,LARGE1	dist\x3d3716\x3bdist\x3d70084
PNO	5:71736191	T	G	15.4899	2.84201	1.97107e-07	intergenic	MGC137014,LARGE1	dist\x3d3821\x3bdist\x3d69979
PNO	5:114707790	G	C	19.2121	3.07252	3.833e-09	intronic	SAMM50	.
PNO	5:114709559	T	C	15.9677	2.84965	9.53139e-08	intronic	SAMM50	.
PNO	5:114711234	T	C	13.3684	2.39574	1.06559e-07	intronic	SAMM50	.
PNO	5:114711724	A	G	17.2932	3.22074	2.88103e-07	intronic	SAMM50	.
PNO	5:114726741	A	G	16.6348	3.06876	2.26598e-07	intergenic	SAMM50,PARVB	dist\x3d1068\x3bdist\x3d26216
PNO	5:116001243	C	G	20.0955	3.32938	1.14723e-08	intergenic	FBLN1,ATXN10	dist\x3d33075\x3bdist\x3d27464
PNO	5:116004832	T	G	19.1127	3.15565	1.0336e-08	intergenic	FBLN1,ATXN10	dist\x3d36664\x3bdist\x3d23875
PNO	5:116004835	G	A	19.1127	3.15565	1.0336e-08	intergenic	FBLN1,ATXN10	dist\x3d36667\x3bdist\x3d23872
PNO	5:116026574	G	T	17.6566	3.35184	4.61424e-07	intergenic	FBLN1,ATXN10	dist\x3d58406\x3bdist\x3d2133
PNO	5:116065186	A	G	14.2277	2.78884	9.84283e-07	intronic	ATXN10	.
PNO	5:116135788	T	C	16.7243	3.17704	4.69204e-07	intronic	ATXN10	.
PNO	5:116417044	T	A	18.7279	3.03602	5.88327e-09	intergenic	MIR3596,PPARA	dist\x3d7749\x3bdist\x3d21876
PNO	5:116810780	G	C	12.6205	2.35245	2.9421e-07	intronic	CELSR1	.
PNO	5:116974596	T	C	12.3206	2.35006	5.17842e-07	intronic	TBC1D22A	.
PNO	5:116991292	C	A	10.5011	1.9691	3.41242e-07	intronic	TBC1D22A	.
PNO	5:117872541	T	C	14.1191	2.6588	3.78978e-07	intergenic	MIR2285O-5,FAM19A5	dist\x3d638347\x3bdist\x3d432294
PNO	5:117918304	A	G	13.4151	2.36872	7.14297e-08	intergenic	MIR2285O-5,FAM19A5	dist\x3d684110\x3bdist\x3d386531
PNO	7:31565958	G	A	11.9237	2.32439	8.66531e-07	intergenic	SNCAIP,LOC781423	dist\x3d24509\x3bdist\x3d73263
PNO	7:32832431	A	T	14.6074	2.84668	8.60478e-07	intergenic	FAM170A,NONE	dist\x3d45225\x3bdist\x3dNONE
PNO	7:33238125	*	A	17.0289	3.05518	1.09794e-07	intronic	PRR16	.
PNO	7:33238126	*	C	17.0289	3.05518	1.09794e-07	intronic	PRR16	.
PNO	7:37233878	C	A	14.8741	2.80081	3.78433e-07	intergenic	NONE,SEMA6A	dist\x3dNONE\x3bdist\x3d83101
PNO	7:51157976	A	T	11.2615	2.10331	3.09174e-07	intronic	NRG2	.
PNO	7:54540243	T	C	11.463	2.03917	8.74265e-08	intergenic	NR3C1,TRNAC-GCA	dist\x3d48380\x3bdist\x3d688483
PNO	7:54735120	C	T	10.217	1.89402	2.56377e-07	intergenic	NR3C1,TRNAC-GCA	dist\x3d243257\x3bdist\x3d493606
PNO	7:54735752	A	G	9.77855	1.91251	9.35391e-07	intergenic	NR3C1,TRNAC-GCA	dist\x3d243889\x3bdist\x3d492974
PNO	7:54750819	C	A	10.7825	1.99697	2.50329e-07	intergenic	NR3C1,TRNAC-GCA	dist\x3d258956\x3bdist\x3d477907
PNO	7:54757148	C	A	10.1707	1.98275	8.67493e-07	intergenic	NR3C1,TRNAC-GCA	dist\x3d265285\x3bdist\x3d471578
PNO	7:54790543	G	A	13.9445	2.65425	4.92352e-07	intergenic	NR3C1,TRNAC-GCA	dist\x3d298680\x3bdist\x3d438183
PNO	7:54820566	A	G	13.6062	2.55839	3.6531e-07	intergenic	NR3C1,TRNAC-GCA	dist\x3d328703\x3bdist\x3d408160
PNO	7:54967130	G	A	12.3915	2.40964	8.1837e-07	intergenic	NR3C1,TRNAC-GCA	dist\x3d475267\x3bdist\x3d261596
PNO	7:57414434	T	C	-10.6397	1.94201	1.7243e-07	intergenic	LARS,RBM27	dist\x3d16419\x3bdist\x3d3013
PNO	7:57619835	A	G	10.8499	2.01517	2.68898e-07	intergenic	POU4F3,TCERG1	dist\x3d82401\x3bdist\x3d26743
PNO	7:60774685	G	A	11.0823	2.09485	4.15859e-07	intronic	IL17B	.
PNO	7:64114020	C	T	11.401	2.19613	6.54842e-07	intergenic	NMUR2,GRIA1	dist\x3d460138\x3bdist\x3d657791
PNO	7:64121146	G	A	11.6482	2.1358	1.93955e-07	intergenic	NMUR2,GRIA1	dist\x3d467264\x3bdist\x3d650665
PNO	7:64125789	T	C	10.5461	2.00146	4.5835e-07	intergenic	NMUR2,GRIA1	dist\x3d471907\x3bdist\x3d646022
PNO	7:64130542	A	G	12.6611	2.4376	6.46903e-07	intergenic	NMUR2,GRIA1	dist\x3d476660\x3bdist\x3d641269
PNO	7:64130949	C	A	11.5488	2.22898	6.86064e-07	intergenic	NMUR2,GRIA1	dist\x3d477067\x3bdist\x3d640862
PNO	7:64133541	C	T	13.3739	1.97859	2.74055e-10	intergenic	NMUR2,GRIA1	dist\x3d479659\x3bdist\x3d638270
PNO	7:64146935	G	A	10.8775	2.01673	2.57185e-07	intergenic	NMUR2,GRIA1	dist\x3d493053\x3bdist\x3d624876
PNO	7:65954123	G	A	10.0639	1.95276	7.77669e-07	intronic	LARP1	.
PNO	7:65980468	G	A	10.5548	1.98708	3.76615e-07	intronic	LARP1	.
PNO	7:65980595	A	G	10.5967	1.90209	1.1123e-07	intronic	LARP1	.
PNO	7:65991346	T	C	10.4677	1.94873	2.85095e-07	intronic	LARP1	.
PNO	7:65994846	C	T	10.4547	2.01438	6.59058e-07	intronic	LARP1	.
PNO	7:66016163	C	T	11.02	2.02698	2.10176e-07	UTR3	FAXDC2	XM_024995381.1:c.*292A>G
PNO	7:66039797	C	G	10.5131	1.94754	2.5183e-07	intronic	FAXDC2	.
PNO	7:66054869	G	A	10.432	2.01979	7.39046e-07	intronic	CNOT8	.
PNO	7:66065443	T	C	10.804	2.01447	2.96474e-07	exonic	GEMIN5	.
PNO	7:66066418	T	A	10.2711	1.91932	3.13155e-07	intronic	GEMIN5	.
PNO	7:66072744	G	A	11.4045	2.10203	2.21557e-07	exonic	GEMIN5	.
PNO	7:66095619	T	C	10.78	1.97315	1.85406e-07	intronic	GEMIN5	.
PNO	7:68080925	A	G	11.0495	2.04217	2.37454e-07	intergenic	SGCD,HAVCR1	dist\x3d61623\x3bdist\x3d121302
PNO	7:69538163	A	G	11.1098	2.05476	2.41758e-07	intergenic	CLINT1,EBF1	dist\x3d100336\x3bdist\x3d746090
PNO	9:12145861	G	T	-10.5009	2.0545	9.42814e-07	intronic	KCNQ5	.
PNO	12:83173133	A	C	18.3486	3.29729	1.14642e-07	intronic	FAM155A	.
PNO	13:28599381	A	T	13.2969	2.55594	6.22877e-07	intronic	FRMD4A	.
PNO	13:67223679	C	G	11.4428	2.13612	3.05397e-07	intronic	LBP	.
PNO	14:46936936	G	A	12.8417	2.51555	9.69946e-07	intergenic	MED30,SLC30A8	dist\x3d135316\x3bdist\x3d172540
PNO	14:63273360	G	A	11.4294	2.21418	7.49091e-07	intergenic	ZNF706,YWHAZ	dist\x3d112184\x3bdist\x3d121056
PNO	19:25863759	G	T	-10.8553	2.12706	9.76328e-07	intergenic	WSCD1,NLRP1	dist\x3d176660\x3bdist\x3d163993
PNO	19:58016538	A	T	11.8575	2.31425	8.90934e-07	UTR3	SDK2	XM_024981092.1:c.*2134T>A,XM_024981091.1:c.*2134T>A
PNO	20:29985104	C	T	11.6039	2.22042	5.58992e-07	intergenic	HCN1,MRPS30	dist\x3d422778\x3bdist\x3d75598
PNO	22:36045243	A	G	14.8066	2.75516	2.81715e-07	intergenic	MAGI1,ADAMTS9	dist\x3d22180\x3bdist\x3d715344
PNO	26:23528363	C	A	14.7031	2.82845	6.34604e-07	intergenic	AS3MT,CNNM2	dist\x3d8478\x3bdist\x3d22299
PNO	26:24013890	C	G	11.8081	2.23564	4.32533e-07	intronic	PDCD11	.
RMO	1:117242621	A	G	217.342	42.5551	9.59471e-07	intronic	MINDY4B	.
RMO	1:117242627	C	G	219.293	38.9698	8.50025e-08	intronic	MINDY4B	.
RMO	2:135912788	T	C	297.044	51.1789	3.61008e-08	intergenic	ARHGEF19,EPHA2	dist\x3d1568\x3bdist\x3d32429
RMO	3:27293179	C	T	238.64	46.456	8.39176e-07	intronic	SLC22A15	.
RMO	3:34068354	A	G	238.399	46.0498	6.99416e-07	intronic	SORT1	.
RMO	3:39562407	G	T	287.369	48.6579	2.18821e-08	intergenic	NONE,LOC539383	dist\x3dNONE\x3bdist\x3d180747
RMO	3:39566800	T	C	272.492	50.722	2.84185e-07	intergenic	NONE,LOC539383	dist\x3dNONE\x3bdist\x3d176354
RMO	3:39585629	G	T	309.001	45.5954	2.49456e-10	intergenic	NONE,LOC539383	dist\x3dNONE\x3bdist\x3d157525
RMO	3:40572578	C	T	204.871	37.6377	2.0381e-07	intergenic	COL11A1,OLFM3	dist\x3d41907\x3bdist\x3d699137
RMO	3:40589624	T	C	194.567	37.6839	7.44936e-07	intergenic	COL11A1,OLFM3	dist\x3d58953\x3bdist\x3d682091
RMO	3:53270169	T	A	264.203	49.9269	4.12931e-07	intergenic	ZNF326,LRRC8D	dist\x3d10437\x3bdist\x3d43018
RMO	5:51089114	A	G	238.581	44.2603	2.61097e-07	intronic	MON2	.
RMO	6:44777570	C	T	246.213	47.4043	6.47471e-07	intergenic	SEPSECS,PI4K2B	dist\x3d40668\x3bdist\x3d27947
RMO	8:63007174	A	G	229.797	44.2522	6.50406e-07	intergenic	XPA,FOXE1	dist\x3d98432\x3bdist\x3d45299
RMO	8:67492325	C	T	271.119	51.2896	4.24056e-07	intergenic	LZTS1,TRNAC-GCA	dist\x3d63446\x3bdist\x3d367193
RMO	8:67492485	C	T	290.925	50.6757	4.90973e-08	intergenic	LZTS1,TRNAC-GCA	dist\x3d63606\x3bdist\x3d367033
RMO	8:67492490	A	G	290.925	50.6757	4.90973e-08	intergenic	LZTS1,TRNAC-GCA	dist\x3d63611\x3bdist\x3d367028
RMO	8:67492496	A	G	309.744	50.865	8.76405e-09	intergenic	LZTS1,TRNAC-GCA	dist\x3d63617\x3bdist\x3d367022
RMO	8:67492507	T	C	296.909	46.988	2.73555e-09	intergenic	LZTS1,TRNAC-GCA	dist\x3d63628\x3bdist\x3d367011
RMO	8:67492520	C	A	278.758	49.6226	8.90529e-08	intergenic	LZTS1,TRNAC-GCA	dist\x3d63641\x3bdist\x3d366998
RMO	19:60168756	G	C	251.785	49.1262	8.84626e-07	intergenic	TRNAG-UCC,KCNJ2	dist\x3d1059969\x3bdist\x3d439789
RMO	20:1049957	T	C	273.455	46.0667	1.885e-08	intronic	SLIT3	.
RMO	20:68175670	G	C	198.988	36.5753	2.06446e-07	intergenic	LOC101902976,IRX1	dist\x3d96854\x3bdist\x3d1154547
RMO	23:47254437	T	C	252.558	46.5628	2.23048e-07	intergenic	TRNAQ-CUG,EEF1E1	dist\x3d11370\x3bdist\x3d112825
RMO	26:24606877	T	C	253.549	48.922	6.8135e-07	intronic	COL17A1	.
RMO	26:43306736	C	G	244.889	47.3114	7.02189e-07	intergenic	BUB3,GPR26	dist\x3d346667\x3bdist\x3d112466
APO	1:152598631	G	A	0.000904186	0.00014673	6.07405e-09	downstream	HACL1	.
APO	1:152600842	T	C	0.000847076	0.000163912	7.29067e-07	intronic	HACL1	.
APO	2:17198573	C	T	0.00108235	0.000186038	3.37345e-08	intronic	ZNF385B	.
APO	2:99134847	C	G	0.00122322	0.000222447	1.5673e-07	intergenic	CPS1,TRNAC-GCA	dist\x3d667167\x3bdist\x3d75751
APO	2:103466702	C	G	0.00103416	0.000187943	1.54089e-07	intergenic	FN1,MREG	dist\x3d35824\x3bdist\x3d503691
APO	3:25982323	G	A	0.000902621	0.000162833	1.27005e-07	intergenic	TRNAE-UUC,VTCN1	dist\x3d14196\x3bdist\x3d29016
APO	3:34068354	A	G	0.00112743	0.0002107	3.13948e-07	intronic	SORT1	.
APO	3:39562407	G	T	0.00118998	0.000227677	5.57391e-07	intergenic	NONE,LOC539383	dist\x3dNONE\x3bdist\x3d180747
APO	3:39566800	T	C	0.00142238	0.000225146	2.75268e-09	intergenic	NONE,LOC539383	dist\x3dNONE\x3bdist\x3d176354
APO	3:39585629	G	T	0.00147435	0.000206975	3.86352e-11	intergenic	NONE,LOC539383	dist\x3dNONE\x3bdist\x3d157525
APO	3:40589624	T	C	0.00102151	0.000172388	1.98503e-08	intergenic	COL11A1,OLFM3	dist\x3d58953\x3bdist\x3d682091
APO	3:40589928	T	C	0.000975911	0.000187253	5.96785e-07	intergenic	COL11A1,OLFM3	dist\x3d59257\x3bdist\x3d681787
APO	3:101506420	T	C	0.00128278	0.000250899	9.36214e-07	intronic	RNF220	.
APO	3:111758904	T	A	0.000944898	0.000177149	3.39703e-07	intronic	CSMD2	.
APO	5:36078571	C	A	0.00128089	0.000239361	3.13404e-07	intronic	TMEM117	.
APO	5:44799181	C	T	0.0012143	0.000212459	5.55466e-08	intergenic	LOC107132485,CPM	dist\x3d117474\x3bdist\x3d77388
APO	5:114720064	T	C	0.00121672	0.000223907	2.12819e-07	intronic	SAMM50	.
APO	5:116172483	T	C	0.0013065	0.000232229	8.55506e-08	intergenic	ATXN10,WNT7B	dist\x3d3088\x3bdist\x3d57822
APO	6:37932891	G	A	0.00123634	0.000227508	2.12567e-07	intergenic	LCORL,SLIT2	dist\x3d375746\x3bdist\x3d1846384
APO	7:5251226	G	A	0.000865976	0.000163875	4.27353e-07	intergenic	CCDC124,SLC5A5	dist\x3d9605\x3bdist\x3d9486
APO	8:63007174	A	G	0.00116422	0.000198489	2.67168e-08	intergenic	XPA,FOXE1	dist\x3d98432\x3bdist\x3d45299
APO	8:64713747	A	G	0.00108948	0.000211392	7.77151e-07	intergenic	LOC539818,NR4A3	dist\x3d176015\x3bdist\x3d158560
APO	8:65268874	T	C	0.00101013	0.000197255	9.02049e-07	exonic	INVS	.
APO	8:67492485	C	T	0.00132455	0.000235296	8.41822e-08	intergenic	LZTS1,TRNAC-GCA	dist\x3d63606\x3bdist\x3d367033
APO	8:67492490	A	G	0.00132455	0.000235296	8.41822e-08	intergenic	LZTS1,TRNAC-GCA	dist\x3d63611\x3bdist\x3d367028
APO	8:67492496	A	G	0.00137067	0.000236917	3.95362e-08	intergenic	LZTS1,TRNAC-GCA	dist\x3d63617\x3bdist\x3d367022
APO	8:67492507	T	C	0.00120436	0.000222858	2.44797e-07	intergenic	LZTS1,TRNAC-GCA	dist\x3d63628\x3bdist\x3d367011
APO	8:109840210	A	G	0.0010483	0.00020433	8.6419e-07	intronic	CDK5RAP2	.
APO	8:111613265	A	G	0.000997914	0.000193409	7.5694e-07	intergenic	LOC107133158,MYT1L	dist\x3d132835\x3bdist\x3d53117
APO	9:37540536	C	T	0.00086588	0.000161302	2.89813e-07	intergenic	MIR2479,LAMA4	dist\x3d498561\x3bdist\x3d635546
APO	9:39301135	G	A	0.00116554	0.000217154	2.90801e-07	intergenic	SLC16A10,RPF2	dist\x3d20319\x3bdist\x3d21618
APO	9:83889305	G	A	0.00110089	0.000192011	5.09083e-08	intergenic	RAB32,ADGB	dist\x3d25214\x3bdist\x3d15784
APO	11:45788498	A	G	0.0012906	0.000239534	2.64101e-07	intergenic	UXS1,C11H2orf40	dist\x3d9935\x3bdist\x3d40517
APO	11:92670821	T	A	0.00128838	0.000240207	2.95876e-07	intronic	DAB2IP	.
APO	11:93999932	A	G	0.000931615	0.000178245	5.57495e-07	intergenic	PDCL,RC3H2	dist\x3d4738\x3bdist\x3d8629
APO	12:6924471	C	A	0.0012157	0.000213887	6.47315e-08	intergenic	PCDH17,NONE	dist\x3d1700485\x3bdist\x3dNONE
APO	12:13440082	T	C	0.00133226	0.000250407	3.61764e-07	intronic	ENOX1	.
APO	13:30880402	T	C	0.000870776	0.000162742	3.14311e-07	intergenic	MINDY3,PTER	dist\x3d480516\x3bdist\x3d38701
APO	13:30880731	T	C	0.00104163	0.00018965	1.61653e-07	intergenic	MINDY3,PTER	dist\x3d480845\x3bdist\x3d38372
APO	14:12947336	T	C	0.00104364	0.00020027	5.98273e-07	intergenic	MYC,MIR2310	dist\x3d287720\x3bdist\x3d443541
APO	14:33760738	C	A	0.00143108	0.000238742	1.4118e-08	intergenic	TRNAG-CCC,PRDM14	dist\x3d48407\x3bdist\x3d25916
APO	14:33761065	T	C	0.00118596	0.000229455	7.26715e-07	intergenic	TRNAG-CCC,PRDM14	dist\x3d48734\x3bdist\x3d25589
APO	14:33761079	G	A	0.00117422	0.000223788	5.07547e-07	intergenic	TRNAG-CCC,PRDM14	dist\x3d48748\x3bdist\x3d25575
APO	14:37519024	T	C	0.000919447	0.000177654	7.04152e-07	intronic	JPH1	.
APO	14:38607741	C	T	0.00128177	0.000231145	1.25766e-07	intergenic	CRISPLD1,HNF4G	dist\x3d262199\x3bdist\x3d88661
APO	14:38610034	A	G	0.00128951	0.000243783	4.17171e-07	intergenic	CRISPLD1,HNF4G	dist\x3d264492\x3bdist\x3d86368
APO	14:49009759	C	T	0.00095198	0.000183347	6.52377e-07	intergenic	TRPS1,CSMD3	dist\x3d100760\x3bdist\x3d1796022
APO	14:50497300	G	T	0.00129995	0.000234304	1.24082e-07	intergenic	TRPS1,CSMD3	dist\x3d1588301\x3bdist\x3d308481
APO	14:54980148	T	C	0.00117546	0.000224996	5.63225e-07	intronic	PKHD1L1	.
APO	14:56203982	G	A	0.00129304	0.000243093	3.63873e-07	intergenic	EMC2,EIF3E	dist\x3d180155\x3bdist\x3d41973
APO	14:63526245	G	C	0.00112915	0.000218744	7.48879e-07	intergenic	YWHAZ,TRNAY-AUA	dist\x3d97126\x3bdist\x3d79228
APO	14:81818946	T	C	0.00125443	0.000224219	9.93691e-08	intronic	MTBP	.
APO	14:81875933	A	G	0.00132146	0.000239899	1.49821e-07	intronic	SNTB1	.
APO	15:68338948	A	G	0.00119313	0.000227223	4.98549e-07	intergenic	C15H11orf74,LRRC4C	dist\x3d1249591\x3bdist\x3d2058983
APO	15:70864931	T	G	0.000972896	0.000189541	8.54527e-07	intergenic	NONE,NONE	dist\x3dNONE\x3bdist\x3dNONE
APO	17:7883673	G	C	0.00104814	0.00020489	9.23945e-07	intergenic	TRNAE-UUC,IQCM	dist\x3d89139\x3bdist\x3d159744
APO	17:66361042	T	C	0.000950025	0.000181921	5.68878e-07	intergenic	LOC614881,TRNAG-ACC	dist\x3d19997\x3bdist\x3d65302
APO	18:3121206	G	A	0.00140476	0.000231018	9.16135e-09	intergenic	TERF2IP,CNTNAP4	dist\x3d177287\x3bdist\x3d299282
APO	18:3121208	G	C	0.00140476	0.000231018	9.16135e-09	intergenic	TERF2IP,CNTNAP4	dist\x3d177289\x3bdist\x3d299280
APO	18:64675599	T	G	0.000969438	0.000186795	6.5954e-07	intergenic	LOC112441491,LOC527186	dist\x3d10958\x3bdist\x3d7387
APO	19:59325751	C	T	0.001103	0.000209503	4.67631e-07	intergenic	TRNAG-UCC,KCNJ2	dist\x3d216964\x3bdist\x3d1282794
APO	19:59332925	T	C	0.000943105	0.000182342	7.14868e-07	intergenic	TRNAG-UCC,KCNJ2	dist\x3d224138\x3bdist\x3d1275620
APO	19:60168756	G	C	0.0012326	0.000221346	1.12511e-07	intergenic	TRNAG-UCC,KCNJ2	dist\x3d1059969\x3bdist\x3d439789
APO	19:60168819	G	C	0.00106714	0.000207333	8.01573e-07	intergenic	TRNAG-UCC,KCNJ2	dist\x3d1060032\x3bdist\x3d439726
APO	19:60733369	C	A	0.00114421	0.000214318	3.32034e-07	intronic	KCNJ16	.
APO	20:1610388	C	T	0.000839918	0.000164596	9.78804e-07	intronic	DOCK2	.
APO	20:15120092	A	G	0.00125805	0.000200641	3.50917e-09	intronic	RNF180	.
APO	20:68175670	G	C	0.000896941	0.00017087	5.02392e-07	intergenic	LOC101902976,IRX1	dist\x3d96854\x3bdist\x3d1154547
APO	22:37440566	C	T	0.00102913	0.000198585	6.82576e-07	intergenic	PSMD6,ATXN7	dist\x3d1259\x3bdist\x3d26237
APO	26:24606877	T	C	0.00116176	0.000223175	6.13776e-07	intronic	COL17A1	.
APO	26:24616349	G	C	0.00109046	0.000209875	6.42005e-07	intronic	COL17A1	.
APO	26:24664866	C	A	0.00106295	0.000206403	7.91155e-07	intergenic	COL17A1,SFR1	dist\x3d26603\x3bdist\x3d21732
APO	26:24671810	G	A	0.000998669	0.000186524	3.09265e-07	intergenic	COL17A1,SFR1	dist\x3d33547\x3bdist\x3d14788
APO	26:25206535	G	C	0.00112838	0.000205366	1.60031e-07	intronic	SORCS3	.
APO	26:25210690	T	C	0.00135762	0.00021182	1.71677e-09	intronic	SORCS3	.
APO	26:25215846	A	C	0.00102343	0.000195198	5.16962e-07	intronic	SORCS3	.
APO	26:25461064	C	A	0.00137643	0.00025927	3.81567e-07	intronic	SORCS3	.
APO	26:27030551	A	C	0.00121904	0.000223442	1.92148e-07	intergenic	TRNAA-AGC,SORCS1	dist\x3d546041\x3bdist\x3d524326
APO	26:30041456	A	G	0.00107982	0.000211678	9.86184e-07	intergenic	MIR2285K-4,XPNPEP1	dist\x3d874916\x3bdist\x3d389008
APO	26:32366552	A	C	0.00096937	0.00018629	6.19529e-07	intergenic	ADRA2A,GPAM	dist\x3d776554\x3bdist\x3d318987
APO	26:36129968	T	C	0.00100864	0.000194899	7.05101e-07	intronic	ATRNL1	.
APO	26:36131562	T	A	0.000947022	0.000181816	6.05118e-07	intronic	ATRNL1	.
APO	26:43306736	C	G	0.00111224	0.000216161	8.07328e-07	intergenic	BUB3,GPR26	dist\x3d346667\x3bdist\x3d112466
APO	27:1181423	A	G	0.00107336	0.000206151	6.10689e-07	intronic	DLGAP2	.
APO	27:6704065	G	A	0.00122109	0.000212967	5.08422e-08	intergenic	DEFB7,DEFB1	dist\x3d25792\x3bdist\x3d17707
APO	29:27539219	C	T	0.00113386	0.0002215	9.09942e-07	downstream	OR8G5	.
FDO	2:51526802	T	C	0.0184153	0.00356374	7.30545e-07	intergenic	LOC786829,LOC101904069	dist\x3d1894923\x3bdist\x3d642830
FDO	3:111742420	A	G	0.0165657	0.00287767	4.54891e-08	intronic	CSMD2	.
FDO	3:111758904	T	A	0.0181568	0.00332244	1.84027e-07	intronic	CSMD2	.
FDO	5:36078571	C	A	0.0249662	0.00440497	6.9964e-08	intronic	TMEM117	.
FDO	5:44799181	C	T	0.0239596	0.00389061	6.19602e-09	intergenic	LOC107132485,CPM	dist\x3d117474\x3bdist\x3d77388
FDO	5:45245511	C	T	0.024006	0.00408832	2.58844e-08	intergenic	RAP1B,MDM1	dist\x3d44640\x3bdist\x3d200976
FDO	5:51698498	C	T	0.0217238	0.0042388	8.85714e-07	intronic	FAM19A2	.
FDO	5:116990632	T	C	0.0137587	0.00266883	7.71853e-07	intronic	TBC1D22A	.
FDO	5:116991292	C	A	0.0137748	0.00265385	6.57544e-07	intronic	TBC1D22A	.
FDO	6:68542056	C	T	0.0209994	0.00411821	9.95461e-07	intronic	SCFD2	.
FDO	7:35583127	C	T	0.0204107	0.0039567	7.60746e-07	intergenic	DTWD2,SEMA6A	dist\x3d659135\x3bdist\x3d1733852
FDO	7:52552783	A	G	0.021345	0.00404775	4.49757e-07	intronic	PCDHGA2,PCDHGA8,PCDHGB4	.
FDO	7:52552999	G	A	0.0229758	0.00399878	4.7971e-08	intronic	PCDHGA2,PCDHGA8,PCDHGB4	.
FDO	7:69438145	G	A	0.0187056	0.00362062	7.33879e-07	upstream	CLINT1	.
FDO	9:83889305	G	A	0.0191961	0.00361272	3.73495e-07	intergenic	RAB32,ADGB	dist\x3d25214\x3bdist\x3d15784
FDO	10:42368448	T	C	0.0240379	0.00448207	2.96551e-07	intergenic	MDGA2,RPS29	dist\x3d1621697\x3bdist\x3d259050
FDO	10:45088662	T	C	0.0198884	0.0037712	4.48791e-07	intergenic	NID2,PTGDR	dist\x3d149517\x3bdist\x3d69329
FDO	10:45094014	A	G	0.0201456	0.00378601	3.60601e-07	intergenic	NID2,PTGDR	dist\x3d154869\x3bdist\x3d63977
FDO	10:75301603	G	T	0.0221308	0.00430935	8.44443e-07	intronic	KCNH5	.
FDO	12:5073669	A	G	0.0191348	0.00371922	8.09489e-07	intergenic	TRNAS-GGA,PCDH17	dist\x3d29718\x3bdist\x3d29510
FDO	12:5093383	C	A	0.0223015	0.00411629	2.29609e-07	intergenic	TRNAS-GGA,PCDH17	dist\x3d49432\x3bdist\x3d9796
FDO	12:80776221	G	T	0.02075	0.00395469	5.07738e-07	intergenic	TRNAF-GAA,EFNB2	dist\x3d928039\x3bdist\x3d1463143
FDO	12:80776243	G	A	0.0201988	0.00378008	3.24963e-07	intergenic	TRNAF-GAA,EFNB2	dist\x3d928061\x3bdist\x3d1463121
FDO	12:80776258	A	C	0.0202174	0.00382841	4.3425e-07	intergenic	TRNAF-GAA,EFNB2	dist\x3d928076\x3bdist\x3d1463106
FDO	14:12947336	T	C	0.0190272	0.00372388	9.49979e-07	intergenic	MYC,MIR2310	dist\x3d287720\x3bdist\x3d443541
FDO	14:12950185	C	G	0.0167976	0.0031452	3.29157e-07	intergenic	MYC,MIR2310	dist\x3d290569\x3bdist\x3d440692
FDO	14:33754860	T	C	0.0239813	0.00447049	2.9487e-07	intergenic	TRNAG-CCC,PRDM14	dist\x3d42529\x3bdist\x3d31794
FDO	14:33760738	C	A	0.0273768	0.00438107	3.91176e-09	intergenic	TRNAG-CCC,PRDM14	dist\x3d48407\x3bdist\x3d25916
FDO	14:33761079	G	A	0.0218081	0.00413714	4.53881e-07	intergenic	TRNAG-CCC,PRDM14	dist\x3d48748\x3bdist\x3d25575
FDO	14:36012146	A	G	0.0192071	0.00362333	3.95786e-07	intronic	KCNB2	.
FDO	14:37519024	T	C	0.0173147	0.00326521	3.92473e-07	intronic	JPH1	.
FDO	14:38607741	C	T	0.0221325	0.00427021	6.80461e-07	intergenic	CRISPLD1,HNF4G	dist\x3d262199\x3bdist\x3d88661
FDO	14:38610029	C	T	0.0231498	0.00445912	6.54376e-07	intergenic	CRISPLD1,HNF4G	dist\x3d264487\x3bdist\x3d86373
FDO	14:38610034	A	G	0.0244036	0.00449334	2.15808e-07	intergenic	CRISPLD1,HNF4G	dist\x3d264492\x3bdist\x3d86368
FDO	14:50497300	G	T	0.0239089	0.00440702	2.21835e-07	intergenic	TRPS1,CSMD3	dist\x3d1588301\x3bdist\x3d308481
FDO	14:78841552	G	T	0.0201267	0.00380057	4.05545e-07	intergenic	RALYL,TRNAS-GGA	dist\x3d344529\x3bdist\x3d9646
FDO	14:79230188	G	A	0.0174283	0.003089	7.91735e-08	intergenic	TRNAS-GGA,LOC784458	dist\x3d378919\x3bdist\x3d1211620
FDO	14:81875933	A	G	0.0241885	0.00450725	2.91832e-07	intronic	SNTB1	.
FDO	15:72866401	A	G	0.018886	0.00354041	3.38948e-07	intergenic	NONE,API5	dist\x3dNONE\x3bdist\x3d557403
FDO	15:74945250	T	C	0.0181755	0.00339275	3.0493e-07	intronic	TSPAN18	.
FDO	15:74945251	G	A	0.0181755	0.00339275	3.0493e-07	intronic	TSPAN18	.
FDO	16:28340853	T	C	0.0208727	0.00396454	4.67632e-07	intronic	DNAH14	.
FDO	16:28902322	T	G	0.0189983	0.00353624	2.8394e-07	intronic	TMEM63A	.
FDO	18:56397429	T	C	0.0221088	0.0042529	6.33946e-07	intergenic	IZUMO2,MYH14	dist\x3d25091\x3bdist\x3d13984
FDO	18:56398503	A	G	0.02005	0.00362883	1.38369e-07	intergenic	IZUMO2,MYH14	dist\x3d26165\x3bdist\x3d12910
FDO	18:56715502	G	A	0.0192417	0.00349498	1.51904e-07	intronic	SYT3	.
FDO	18:56716688	C	A	0.0231197	0.00441246	5.2507e-07	intronic	SYT3	.
FDO	18:57435638	C	T	0.0206616	0.00388968	3.76258e-07	intronic	ETFB	.
FDO	18:64995223	A	G	0.0201159	0.00392406	8.80528e-07	exonic	LOC790009	.
FDO	19:25105680	A	G	0.0258913	0.00443033	2.96644e-08	intronic	SMTNL2	.
FDO	19:57417065	A	G	0.0283236	0.00495261	5.46286e-08	intergenic	RPL38,LOC112442754	dist\x3d220594\x3bdist\x3d237805
FDO	19:59184822	A	G	0.0212747	0.0039794	3.2086e-07	intergenic	TRNAG-UCC,KCNJ2	dist\x3d76035\x3bdist\x3d1423723
FDO	20:1610388	C	T	0.0175948	0.00299222	2.48428e-08	intronic	DOCK2	.
FDO	20:68175670	G	C	0.0174322	0.00321166	2.19151e-07	intergenic	LOC101902976,IRX1	dist\x3d96854\x3bdist\x3d1154547
FDO	20:68176360	A	G	0.0167675	0.0032434	7.22883e-07	intergenic	LOC101902976,IRX1	dist\x3d97544\x3bdist\x3d1153857
FDO	20:68970460	G	A	0.0225194	0.0043036	5.42105e-07	intergenic	LOC101902976,IRX1	dist\x3d891644\x3bdist\x3d359757
FDO	22:35832273	A	G	0.0184331	0.00352371	5.45904e-07	intronic	MAGI1	.
FDO	22:35835023	G	C	0.0218118	0.00410189	3.66616e-07	intronic	MAGI1	.
FDO	26:25206535	G	C	0.0203776	0.003872	4.72034e-07	intronic	SORCS3	.
FDO	26:25210690	T	C	0.0220185	0.00410316	2.92279e-07	intronic	SORCS3	.
FDO	26:50907970	A	C	0.0170814	0.00324221	4.59907e-07	intronic	CFAP46	.
FDO	27:3236703	T	C	0.0228656	0.00437892	5.69998e-07	intronic	CSMD1	.
FDO	27:6704065	G	A	0.0239188	0.00389775	6.91589e-09	intergenic	DEFB7,DEFB1	dist\x3d25792\x3bdist\x3d17707
FDO	27:13794684	C	T	0.0169114	0.00324605	6.01955e-07	intergenic	TENM3,TRNAC-ACA	dist\x3d20246\x3bdist\x3d63311
STE	1:128711804	G	T	64.5769	11.2272	4.65638e-08	intronic	CLSTN2	.
STE	1:144863349	A	G	74.3916	13.831	2.75892e-07	intergenic	FAM207A,ADARB1	dist\x3d29010\x3bdist\x3d74454
STE	2:36269549	T	C	94.1106	18.1318	6.57967e-07	intronic	PLA2R1	.
STE	2:38844982	T	C	67.1281	12.7261	4.46544e-07	intergenic	ACVR1C,CYTIP	dist\x3d13838\x3bdist\x3d16733
STE	2:38927961	C	G	79.2447	14.7554	2.86456e-07	intronic	CYTIP	.
STE	2:98958292	T	G	72.2676	13.1405	1.56221e-07	intergenic	CPS1,TRNAC-GCA	dist\x3d490612\x3bdist\x3d252306
STE	3:85635138	A	G	64.3477	11.9027	2.42589e-07	intergenic	NFIA,C3H1orf87	dist\x3d1014348\x3bdist\x3d69797
STE	3:85683647	T	C	55.0612	10.7775	9.52655e-07	intergenic	NFIA,C3H1orf87	dist\x3d1062857\x3bdist\x3d21288
STE	4:42441279	C	G	70.042	13.1558	3.55634e-07	intronic	MAGI2	.
STE	7:25851527	T	C	65.9065	12.4099	3.78144e-07	intronic	SLC12A2	.
STE	7:31037595	G	T	68.8587	13.2521	6.41126e-07	intronic	SNX2	.
STE	7:37833167	C	A	80.4816	13.9848	4.58623e-08	intergenic	COMMD10,ARL10	dist\x3d50100\x3bdist\x3d6862
STE	7:37833203	A	T	87.2757	14.5646	1.42538e-08	intergenic	COMMD10,ARL10	dist\x3d50136\x3bdist\x3d6826
STE	7:37833204	T	C	87.2757	14.5646	1.42538e-08	intergenic	COMMD10,ARL10	dist\x3d50137\x3bdist\x3d6825
STE	7:37833214	T	C	81.1681	14.2734	6.38609e-08	intergenic	COMMD10,ARL10	dist\x3d50147\x3bdist\x3d6815
STE	7:37833216	C	T	81.1681	14.2734	6.38609e-08	intergenic	COMMD10,ARL10	dist\x3d50149\x3bdist\x3d6813
STE	7:37834754	G	A	70.3243	13.3061	4.25878e-07	intergenic	COMMD10,ARL10	dist\x3d51687\x3bdist\x3d5275
STE	7:54621823	T	C	80.7242	15.2761	4.27423e-07	intergenic	NR3C1,TRNAC-GCA	dist\x3d129960\x3bdist\x3d606903
STE	8:85503874	A	G	83.6606	14.6326	5.50352e-08	intronic	ZNF169	.
STE	12:9849015	G	A	85.8919	16.5585	6.67648e-07	intergenic	TRNAC-GCA,TRNAC-GCA	dist\x3d11968\x3bdist\x3d189536
STE	12:9849021	A	G	85.8919	16.5585	6.67648e-07	intergenic	TRNAC-GCA,TRNAC-GCA	dist\x3d11974\x3bdist\x3d189530
STE	15:69152067	C	T	62.0446	11.7185	4.07671e-07	intergenic	NONE,LRRC4C	dist\x3dNONE\x3bdist\x3d1245864
STE	16:66061518	G	A	71.3675	13.6198	5.24291e-07	intergenic	FAM129A,RNF2	dist\x3d49476\x3bdist\x3d18051
STE	21:35356397	A	G	92.3826	16.6395	1.21819e-07	intergenic	STXBP6,MIR2888-1	dist\x3d50465\x3bdist\x3d385936
STE	21:36073717	A	G	75.6584	14.7216	8.30191e-07	intergenic	MIR2888-1,NOVA1	dist\x3d331320\x3bdist\x3d802294
STE	21:38924056	A	G	71.8852	13.284	2.36656e-07	intergenic	LOC785745,FOXG1	dist\x3d1047568\x3bdist\x3d317045
STE	24:6174460	C	T	78.5011	15.3439	9.21999e-07	intergenic	CBLN2,SOCS6	dist\x3d835179\x3bdist\x3d841706
STE	29:22715257	C	G	59.9022	11.6256	7.81351e-07	intergenic	ANO5,NELL1	dist\x3d73343\x3bdist\x3d540535
STE	29:22715306	G	A	63.2174	11.7371	2.66403e-07	intergenic	ANO5,NELL1	dist\x3d73392\x3bdist\x3d540486
STE	29:22715431	C	A	64.2426	11.953	2.81118e-07	intergenic	ANO5,NELL1	dist\x3d73517\x3bdist\x3d540361
STE	29:25625659	G	C	84.6399	16.4511	8.09173e-07	intergenic	NAV2,E2F8	dist\x3d400678\x3bdist\x3d73520
ACT	2:62301580	C	T	-53.6235	10.3518	6.8943e-07	exonic	MAP3K19	.
ACT	2:98958292	T	G	51.4407	9.40392	1.79556e-07	intergenic	CPS1,TRNAC-GCA	dist\x3d490612\x3bdist\x3d252306
ACT	2:105917378	A	C	46.372	8.66381	3.11779e-07	intronic	TNS1	.
ACT	2:105946571	G	C	50.2696	9.73115	7.35791e-07	intronic	TNS1	.
ACT	3:29956652	G	T	42.7389	8.1633	5.35175e-07	intronic	MAGI3	.
ACT	3:85635138	A	G	47.5279	8.36032	6.43915e-08	intergenic	NFIA,C3H1orf87	dist\x3d1014348\x3bdist\x3d69797
ACT	3:115000856	G	C	59.6503	11.1062	2.8598e-07	intergenic	SH3BP4,AGAP1	dist\x3d366901\x3bdist\x3d43878
ACT	5:74458502	G	A	58.7193	11.097	4.13598e-07	intergenic	LOC518495,LOC788334	dist\x3d6297\x3bdist\x3d21248
ACT	9:73251110	T	C	51.407	9.82784	5.46947e-07	intronic	MYB	.
ACT	10:10180409	T	C	-47.2425	9.08869	6.3559e-07	intergenic	BHMT2,BHMT	dist\x3d20956\x3bdist\x3d11825
ACT	12:48567785	C	T	-34.7656	6.74332	7.71039e-07	intronic	KLF12	.
ACT	12:51653088	T	C	48.5721	8.88203	1.80876e-07	intergenic	LMO7,KCTD12	dist\x3d755860\x3bdist\x3d345812
ACT	15:76378555	A	G	56.5671	10.7292	4.51937e-07	UTR3	CHRM4	NM_001103243.1:c.*598C>T
ACT	15:77255183	T	G	62.9448	11.8174	3.51708e-07	exonic	PSMC3	.
ACT	15:83614256	T	G	56.9676	10.5106	2.27311e-07	intronic	GLB1L3	.
ACT	15:83859433	T	C	57.3312	10.2397	9.73707e-08	intergenic	B3GAT1,LOC100271685	dist\x3d162122\x3bdist\x3d47696
ACT	15:83860411	T	C	51.4191	9.70354	3.9939e-07	intergenic	B3GAT1,LOC100271685	dist\x3d163100\x3bdist\x3d46718
ACT	29:22715306	G	A	44.2547	8.49576	6.0416e-07	intergenic	ANO5,NELL1	dist\x3d73392\x3bdist\x3d540486
ACT	29:24027779	T	C	-52.5862	10.2153	7.98757e-07	intronic	NELL1	.
VOC	1:13479993	T	C	3.91966	0.768409	9.87188e-07	intergenic	NONE,NCAM2	dist\x3dNONE\x3bdist\x3d1838877
VOC	1:19041701	T	C	3.62386	0.607178	1.60591e-08	intergenic	CHODL,C1H21orf91	dist\x3d304841\x3bdist\x3d185854
VOC	1:145116827	T	C	3.03206	0.567052	3.19608e-07	intergenic	POFUT2,COL18A1	dist\x3d13781\x3bdist\x3d85297
VOC	3:18800678	G	A	-2.43727	0.466755	5.70064e-07	intergenic	S100A10,MIR2412	dist\x3d27256\x3bdist\x3d8074
VOC	3:31800600	A	G	2.90472	0.561999	7.26775e-07	intronic	TMIGD3	.
VOC	3:57623406	*	G	-2.49405	0.471009	4.06642e-07	intronic	CLCA2	.
VOC	7:105375978	C	T	4.13688	0.741493	1.07035e-07	intergenic	LOC112447533,TRNAC-ACA	dist\x3d1691959\x3bdist\x3d948004
VOC	7:109145462	T	G	4.62072	0.818742	7.85565e-08	intergenic	MAN2A1,TMEM232	dist\x3d139648\x3bdist\x3d319946
VOC	9:51424048	T	C	3.12209	0.570125	1.74527e-07	intergenic	POU3F2,TRNAS-GGA	dist\x3d501925\x3bdist\x3d200156
VOC	9:55229848	T	C	2.55438	0.473881	2.61185e-07	intergenic	MANEA,TRNAC-ACA	dist\x3d850737\x3bdist\x3d1380140
VOC	9:59898280	T	G	3.57427	0.681266	5.08786e-07	intergenic	MAP3K7,BACH2	dist\x3d153813\x3bdist\x3d53216
VOC	9:71456749	T	C	3.91718	0.759633	7.67137e-07	intronic	EYA4	.
VOC	9:79594120	C	T	3.52941	0.674091	5.34413e-07	intergenic	NMBR,GJE1	dist\x3d7689\x3bdist\x3d20912
VOC	9:79594143	A	C	3.39291	0.66305	9.17822e-07	intergenic	NMBR,GJE1	dist\x3d7712\x3bdist\x3d20889
VOC	9:100857506	G	A	3.76813	0.711111	3.99522e-07	intergenic	PDE10A,TBXT	dist\x3d127668\x3bdist\x3d293636
VOC	11:19942057	G	C	4.28312	0.725603	2.22153e-08	intergenic	QPCT,CDC42EP3	dist\x3d119580\x3bdist\x3d144048
VOC	11:43152809	A	G	3.62961	0.689615	4.71074e-07	intergenic	NONE,BCL11A	dist\x3dNONE\x3bdist\x3d55547
VOC	11:91776051	A	G	3.22107	0.619023	6.19755e-07	intergenic	TRNAS-ACU,LOC525099	dist\x3d309657\x3bdist\x3d459409
VOC	11:91776444	C	G	3.22073	0.555187	3.661e-08	intergenic	TRNAS-ACU,LOC525099	dist\x3d310050\x3bdist\x3d459016
VOC	15:48458650	A	T	3.59362	0.696242	7.50635e-07	intergenic	LOC514976,LOC781483	dist\x3d7891\x3bdist\x3d56785
VOC	16:59097994	A	G	4.37745	0.756766	3.97288e-08	intergenic	TRNAG-CCC,SEC16B	dist\x3d152852\x3bdist\x3d221513
VOC	16:59115834	A	G	4.17688	0.723701	4.23002e-08	intergenic	TRNAG-CCC,SEC16B	dist\x3d170692\x3bdist\x3d203673
VOC	16:71919685	A	G	2.79888	0.548759	9.9e-07	intergenic	SLC30A1,RD3	dist\x3d47533\x3bdist\x3d37202
VOC	16:73636109	C	T	3.53079	0.6481	1.99371e-07	intergenic	HSD11B1,G0S2	dist\x3d1659\x3bdist\x3d4684
VOC	17:23637905	C	T	3.29089	0.637358	7.44262e-07	intergenic	NONE,PABPC4L	dist\x3dNONE\x3bdist\x3d453043
VOC	21:36180406	G	C	4.65843	0.841492	1.31492e-07	intergenic	MIR2888-1,NOVA1	dist\x3d438009\x3bdist\x3d695605
VOC	21:37177440	G	A	3.27409	0.639093	8.93651e-07	intergenic	NOVA1,LOC785745	dist\x3d298815\x3bdist\x3d698825
VOC	21:43080354	A	G	4.76992	0.76743	4.6377e-09	intronic	AKAP6	.
VOC	21:50116870	T	C	3.78246	0.727165	6.24904e-07	intergenic	MIR2365,LOC100138454	dist\x3d277471\x3bdist\x3d18829
VOC	21:53918002	G	A	3.45367	0.674096	8.92097e-07	intergenic	TRNAC-GCA,FSCB	dist\x3d583665\x3bdist\x3d352068
VOC	22:33509981	G	C	4.40893	0.740554	1.72844e-08	intergenic	FAM19A1,SUCLG2	dist\x3d35804\x3bdist\x3d349499
VOC	23:13569506	C	T	4.43507	0.764021	3.5945e-08	intronic	KIF6	.
VOC	23:13576995	A	G	3.8317	0.745369	8.24921e-07	intronic	KIF6	.
VOC	23:36417459	A	G	3.77939	0.641134	2.31091e-08	intergenic	MIR2284C,SOX4	dist\x3d543968\x3bdist\x3d100476
VOC	23:36421471	A	G	3.89751	0.731015	3.43336e-07	intergenic	MIR2284C,SOX4	dist\x3d547980\x3bdist\x3d96464
VOC	23:36424855	C	T	3.65608	0.702759	6.22584e-07	intergenic	MIR2284C,SOX4	dist\x3d551364\x3bdist\x3d93080
VOC	23:39113189	T	C	3.39706	0.644705	4.58372e-07	intergenic	TRNAI-AAU,RNF144B	dist\x3d796189\x3bdist\x3d65719
VOC	23:39113776	T	C	3.45321	0.669386	7.59864e-07	intergenic	TRNAI-AAU,RNF144B	dist\x3d796776\x3bdist\x3d65132
VOC	23:39114287	C	G	3.7066	0.694576	3.35687e-07	intergenic	TRNAI-AAU,RNF144B	dist\x3d797287\x3bdist\x3d64621
VOC	23:39136669	*	A	4.40519	0.759806	3.72206e-08	intergenic	TRNAI-AAU,RNF144B	dist\x3d819669\x3bdist\x3d42239
VOC	24:50732404	A	T	4.06014	0.766875	4.07992e-07	intergenic	MEX3C,LOC112444158	dist\x3d64655\x3bdist\x3d1468583
VOC	24:54282648	C	A	3.27478	0.614231	3.43545e-07	intronic	CCDC68	.
PC1	1:152598631	G	A	1.28431	0.234384	1.71788e-07	downstream	HACL1	.
PC1	2:17198573	C	T	1.70706	0.288261	2.02183e-08	intronic	ZNF385B	.
PC1	2:131957270	T	G	1.95218	0.374376	5.89278e-07	intronic	KIF17	.
PC1	2:134541216	G	C	1.71579	0.331333	6.94729e-07	intronic	IGSF21	.
PC1	2:135912788	T	C	2.05135	0.366424	9.76604e-08	intergenic	ARHGEF19,EPHA2	dist\x3d1568\x3bdist\x3d32429
PC1	3:23518273	A	T	1.37813	0.267219	7.64903e-07	intergenic	REG4,HMGCS2	dist\x3d10227\x3bdist\x3d18318
PC1	3:23518311	A	T	1.48908	0.276285	2.62016e-07	intergenic	REG4,HMGCS2	dist\x3d10265\x3bdist\x3d18280
PC1	3:25982323	G	A	1.30427	0.253861	8.35996e-07	intergenic	TRNAE-UUC,VTCN1	dist\x3d14196\x3bdist\x3d29016
PC1	3:26369043	C	T	1.79846	0.338878	3.84701e-07	intergenic	PTGFRN,CD2	dist\x3d37596\x3bdist\x3d99462
PC1	3:26373772	A	G	1.81075	0.339428	3.38456e-07	intergenic	PTGFRN,CD2	dist\x3d42325\x3bdist\x3d94733
PC1	3:32693114	C	A	1.59356	0.306013	6.08511e-07	intergenic	CD53,TRNAK-UUU	dist\x3d160088\x3bdist\x3d11177
PC1	3:34068354	A	G	1.71531	0.328827	5.83985e-07	intronic	SORT1	.
PC1	3:39559373	C	T	1.89997	0.353494	2.80796e-07	intergenic	NONE,LOC539383	dist\x3dNONE\x3bdist\x3d183781
PC1	3:39562407	G	T	2.18662	0.341588	1.78888e-09	intergenic	NONE,LOC539383	dist\x3dNONE\x3bdist\x3d180747
PC1	3:39566800	T	C	2.22208	0.349409	2.21922e-09	intergenic	NONE,LOC539383	dist\x3dNONE\x3bdist\x3d176354
PC1	3:39585629	G	T	2.1052	0.326338	1.38346e-09	intergenic	NONE,LOC539383	dist\x3dNONE\x3bdist\x3d157525
PC1	3:40589392	G	A	1.42704	0.274245	6.19637e-07	intergenic	COL11A1,OLFM3	dist\x3d58721\x3bdist\x3d682323
PC1	3:40589624	T	C	1.59944	0.267365	1.49876e-08	intergenic	COL11A1,OLFM3	dist\x3d58953\x3bdist\x3d682091
PC1	3:40589928	T	C	1.57648	0.287146	1.63324e-07	intergenic	COL11A1,OLFM3	dist\x3d59257\x3bdist\x3d681787
PC1	3:40604796	C	A	1.60816	0.313574	8.71843e-07	intergenic	COL11A1,OLFM3	dist\x3d74125\x3bdist\x3d666919
PC1	3:42807111	C	T	1.42828	0.274019	5.95064e-07	intronic	CDC14A	.
PC1	3:42821620	C	T	1.64323	0.31837	7.50901e-07	intronic	CDC14A	.
PC1	3:42859310	C	T	1.74365	0.334369	5.88604e-07	intronic	CDC14A	.
PC1	3:42859359	C	T	1.76346	0.344055	8.8359e-07	intronic	CDC14A	.
PC1	3:42864300	G	A	1.53193	0.298486	8.56772e-07	intronic	CDC14A	.
PC1	3:44123032	C	A	1.72716	0.331064	5.8255e-07	intergenic	PLPPR4,PLPPR5	dist\x3d146755\x3bdist\x3d95159
PC1	3:89439515	G	A	1.8374	0.332514	1.37986e-07	intronic	FYB2	.
PC1	3:90960139	A	G	1.98735	0.375302	4.06243e-07	intergenic	TRNAW-CCA,USP24	dist\x3d1226553\x3bdist\x3d171274
PC1	3:97787712	T	C	2.01842	0.38024	3.82638e-07	intronic	SPATA6	.
PC1	3:97787717	C	T	2.01842	0.38024	3.82638e-07	intronic	SPATA6	.
PC1	3:97804466	C	T	1.72633	0.317657	2.12275e-07	intronic	SPATA6	.
PC1	4:1052190	C	G	1.96492	0.381143	7.71804e-07	intergenic	TRNAC-ACA,NONE	dist\x3d115930\x3bdist\x3dNONE
PC1	5:41712048	T	G	1.95089	0.353391	1.4149e-07	intergenic	ABCD2,KIF21A	dist\x3d228542\x3bdist\x3d20622
PC1	5:44799181	C	T	1.92649	0.324026	1.79904e-08	intergenic	LOC107132485,CPM	dist\x3d117474\x3bdist\x3d77388
PC1	5:71723671	A	T	1.75085	0.308724	6.87868e-08	intergenic	MGC137211,MGC137014	dist\x3d11293\x3bdist\x3d3314
PC1	5:71728649	C	T	1.90645	0.342412	1.13028e-07	intronic	MGC137014	.
PC1	5:71736086	A	G	2.19503	0.385756	6.27789e-08	intergenic	MGC137014,LARGE1	dist\x3d3716\x3bdist\x3d70084
PC1	5:114718411	A	C	1.60926	0.306052	4.82342e-07	intronic	SAMM50	.
PC1	5:114720064	T	C	1.97739	0.343931	4.71214e-08	intronic	SAMM50	.
PC1	5:114727026	C	G	1.93641	0.359139	2.59395e-07	intergenic	SAMM50,PARVB	dist\x3d1353\x3bdist\x3d25931
PC1	5:116172483	T	C	1.96938	0.359187	1.69069e-07	intergenic	ATXN10,WNT7B	dist\x3d3088\x3bdist\x3d57822
PC1	5:117872541	T	C	1.60615	0.293823	1.82739e-07	intergenic	MIR2285O-5,FAM19A5	dist\x3d638347\x3bdist\x3d432294
PC1	6:37932891	G	A	2.02715	0.347838	3.21269e-08	intergenic	LCORL,SLIT2	dist\x3d375746\x3bdist\x3d1846384
PC1	7:54904627	*	T	1.95685	0.369626	4.08463e-07	intergenic	NR3C1,TRNAC-GCA	dist\x3d412764\x3bdist\x3d324099
PC1	7:57741416	A	G	1.82567	0.356056	8.75733e-07	intergenic	GPR151,PPP2R2B	dist\x3d37110\x3bdist\x3d54778
PC1	8:63007174	A	G	1.74992	0.308905	7.09221e-08	intergenic	XPA,FOXE1	dist\x3d98432\x3bdist\x3d45299
PC1	8:65268874	T	C	1.62648	0.30082	2.41795e-07	exonic	INVS	.
PC1	8:67492485	C	T	2.02352	0.363948	1.17302e-07	intergenic	LZTS1,TRNAC-GCA	dist\x3d63606\x3bdist\x3d367033
PC1	8:67492490	A	G	2.02352	0.363948	1.17302e-07	intergenic	LZTS1,TRNAC-GCA	dist\x3d63611\x3bdist\x3d367028
PC1	8:67492496	A	G	2.13862	0.365202	2.79813e-08	intergenic	LZTS1,TRNAC-GCA	dist\x3d63617\x3bdist\x3d367022
PC1	8:67492507	T	C	1.94165	0.342325	6.85522e-08	intergenic	LZTS1,TRNAC-GCA	dist\x3d63628\x3bdist\x3d367011
PC1	8:69437189	T	C	1.9633	0.371445	4.24976e-07	intronic	HR	.
PC1	9:37540536	C	T	1.3032	0.251515	6.85463e-07	intergenic	MIR2479,LAMA4	dist\x3d498561\x3bdist\x3d635546
PC1	9:83889305	G	A	1.56955	0.302686	6.73069e-07	intergenic	RAB32,ADGB	dist\x3d25214\x3bdist\x3d15784
PC1	9:104427876	A	G	1.62411	0.317838	9.48405e-07	intergenic	LOC100301231,TRNAY-GUA	dist\x3d4548\x3bdist\x3d44216
PC1	9:104428080	A	G	1.62466	0.318467	9.85022e-07	intergenic	LOC100301231,TRNAY-GUA	dist\x3d4752\x3bdist\x3d44012
PC1	11:5530835	A	G	1.27451	0.246585	7.26512e-07	intergenic	CHST10,NMS	dist\x3d8140\x3bdist\x3d6622
PC1	11:45788498	A	G	1.98638	0.372001	3.30692e-07	intergenic	UXS1,C11H2orf40	dist\x3d9935\x3bdist\x3d40517
PC1	11:45814885	G	A	1.73856	0.317923	1.80945e-07	intergenic	UXS1,C11H2orf40	dist\x3d36322\x3bdist\x3d14130
PC1	11:45814903	C	T	1.74696	0.338154	7.34732e-07	intergenic	UXS1,C11H2orf40	dist\x3d36340\x3bdist\x3d14112
PC1	11:92670821	T	A	2.15802	0.362472	1.72772e-08	intronic	DAB2IP	.
PC1	11:93999932	A	G	1.47783	0.277838	3.63999e-07	intergenic	PDCL,RC3H2	dist\x3d4738\x3bdist\x3d8629
PC1	12:13440082	T	C	2.11173	0.38466	1.63575e-07	intronic	ENOX1	.
PC1	13:15887927	T	C	1.94286	0.377592	8.07485e-07	intergenic	NONE,GATA3	dist\x3dNONE\x3bdist\x3d17375
PC1	13:30880402	T	C	1.29896	0.24994	6.38063e-07	intergenic	MINDY3,PTER	dist\x3d480516\x3bdist\x3d38701
PC1	13:30880731	T	C	1.71985	0.289219	1.78975e-08	intergenic	MINDY3,PTER	dist\x3d480845\x3bdist\x3d38372
PC1	13:41496819	C	A	1.78858	0.347871	8.21842e-07	intergenic	PAX1,FOXA2	dist\x3d586672\x3bdist\x3d45742
PC1	13:45281950	G	A	1.62167	0.29065	1.0686e-07	intergenic	PFKP,ADARB2	dist\x3d121134\x3bdist\x3d757743
PC1	13:45281964	C	T	1.62167	0.29065	1.0686e-07	intergenic	PFKP,ADARB2	dist\x3d121148\x3bdist\x3d757729
PC1	13:46941224	T	C	1.77231	0.339143	5.59374e-07	intergenic	ZMYND11,PRNP	dist\x3d28604\x3bdist\x3d98713
PC1	14:50477166	G	T	1.91915	0.364513	4.67332e-07	intergenic	TRPS1,CSMD3	dist\x3d1568167\x3bdist\x3d328615
PC1	14:50489962	T	A	1.75207	0.335935	5.86536e-07	intergenic	TRPS1,CSMD3	dist\x3d1580963\x3bdist\x3d315819
PC1	14:50489972	C	T	1.75207	0.335935	5.86536e-07	intergenic	TRPS1,CSMD3	dist\x3d1580973\x3bdist\x3d315809
PC1	14:50502032	A	C	1.89112	0.355088	3.52788e-07	intergenic	TRPS1,CSMD3	dist\x3d1593033\x3bdist\x3d303749
PC1	14:54980148	T	C	1.95271	0.343095	6.23982e-08	intronic	PKHD1L1	.
PC1	14:63684839	G	T	1.83546	0.357552	8.52651e-07	intergenic	PABPC1,SNX31	dist\x3d41288\x3bdist\x3d21981
PC1	14:79685422	T	C	1.93252	0.369201	5.38076e-07	intergenic	TRNAS-GGA,LOC784458	dist\x3d834153\x3bdist\x3d756386
PC1	14:81818946	T	C	1.99845	0.345749	4.05831e-08	intronic	MTBP	.
PC1	14:81824351	T	C	1.79471	0.328754	1.89126e-07	intronic	MTBP	.
PC1	14:81849683	A	G	2.06837	0.348296	1.8619e-08	intronic	MTBP	.
PC1	14:81867615	A	G	1.91516	0.345754	1.29525e-07	intergenic	MTBP,SNTB1	dist\x3d2907\x3bdist\x3d2947
PC1	14:81875933	A	G	2.1095	0.369833	5.87416e-08	intronic	SNTB1	.
PC1	17:660479	T	A	1.64806	0.306918	2.87586e-07	intronic	CPE	.
PC1	17:2504768	C	T	1.47831	0.280361	4.5064e-07	intergenic	NPY2R,RBM46	dist\x3d411683\x3bdist\x3d35920
PC1	17:7883673	G	C	1.62829	0.31748	8.70566e-07	intergenic	TRNAE-UUC,IQCM	dist\x3d89139\x3bdist\x3d159744
PC1	17:7910576	T	C	1.81382	0.336213	2.55721e-07	intergenic	TRNAE-UUC,IQCM	dist\x3d116042\x3bdist\x3d132841
PC1	18:3121206	G	A	2.13815	0.359852	1.83273e-08	intergenic	TERF2IP,CNTNAP4	dist\x3d177287\x3bdist\x3d299282
PC1	18:3121208	G	C	2.13815	0.359852	1.83273e-08	intergenic	TERF2IP,CNTNAP4	dist\x3d177289\x3bdist\x3d299280
PC1	18:52493964	C	T	1.73425	0.325657	3.53475e-07	intergenic	CEACAM16,BCL3	dist\x3d5136\x3bdist\x3d26175
PC1	18:65693710	T	C	1.85029	0.356241	6.47341e-07	exonic	ZNF132	.
PC1	18:65715353	T	C	1.65823	0.323534	8.84216e-07	intronic	LOC100847773	.
PC1	18:65790939	T	C	1.73641	0.328468	4.23361e-07	intronic	MZF1	.
PC1	19:59325751	C	T	1.66831	0.326332	9.37986e-07	intergenic	TRNAG-UCC,KCNJ2	dist\x3d216964\x3bdist\x3d1282794
PC1	19:60168756	G	C	2.00592	0.339728	2.20351e-08	intergenic	TRNAG-UCC,KCNJ2	dist\x3d1059969\x3bdist\x3d439789
PC1	19:60168819	G	C	1.74606	0.318368	1.67841e-07	intergenic	TRNAG-UCC,KCNJ2	dist\x3d1060032\x3bdist\x3d439726
PC1	19:60733369	C	A	1.74114	0.333517	5.73143e-07	intronic	KCNJ16	.
PC1	20:1049957	T	C	1.86083	0.329288	7.58149e-08	intronic	SLIT3	.
PC1	20:1067319	T	A	1.70245	0.327777	6.47425e-07	intronic	SLIT3	.
PC1	20:15120092	A	G	1.76473	0.318343	1.26842e-07	intronic	RNF180	.
PC1	20:68175670	G	C	1.41445	0.262304	2.58663e-07	intergenic	LOC101902976,IRX1	dist\x3d96854\x3bdist\x3d1154547
PC1	23:39455537	A	G	1.76183	0.344926	9.57139e-07	downstream	TPMT	.
PC1	23:47254437	T	C	1.76166	0.330546	3.46709e-07	intergenic	TRNAQ-CUG,EEF1E1	dist\x3d11370\x3bdist\x3d112825
PC1	24:20394329	T	C	1.75359	0.320351	1.76334e-07	intronic	FHOD3	.
PC1	24:24239268	T	A	1.48002	0.281242	4.72804e-07	intergenic	CCDC178,KLHL14	dist\x3d42680\x3bdist\x3d143415
PC1	24:28958497	A	G	1.81584	0.341376	3.6376e-07	intergenic	CDH2,CHST9	dist\x3d54382\x3bdist\x3d730326
PC1	25:15259170	A	T	1.64302	0.309179	3.72336e-07	intergenic	TRNAG-CCC,LOC100296255	dist\x3d557702\x3bdist\x3d68259
PC1	26:20584172	T	C	1.8964	0.370223	8.96444e-07	intergenic	NKX2-3,SLC25A28	dist\x3d49801\x3bdist\x3d12245
PC1	26:23273596	C	G	1.67637	0.308983	2.21587e-07	intronic	TRIM8	.
PC1	26:23356785	C	G	1.80498	0.344115	5.11623e-07	intronic	WBP1L	.
PC1	26:23520837	C	T	1.89589	0.360867	4.9222e-07	downstream	AS3MT	.
PC1	26:24606877	T	C	1.87658	0.343492	1.85484e-07	intronic	COL17A1	.
PC1	26:24616349	G	C	1.73681	0.323899	2.97831e-07	intronic	COL17A1	.
PC1	26:24664866	C	A	1.7994	0.314733	5.50827e-08	intergenic	COL17A1,SFR1	dist\x3d26603\x3bdist\x3d21732
PC1	26:24671810	G	A	1.56872	0.288559	2.10482e-07	intergenic	COL17A1,SFR1	dist\x3d33547\x3bdist\x3d14788
PC1	26:25191529	T	C	1.76838	0.346318	9.64172e-07	intergenic	MIR2393,SORCS3	dist\x3d96078\x3bdist\x3d11594
PC1	26:25206535	G	C	1.84366	0.315009	2.84359e-08	intronic	SORCS3	.
PC1	26:25209683	G	A	1.71216	0.331125	7.1965e-07	intronic	SORCS3	.
PC1	26:25210690	T	C	2.11787	0.327969	1.3374e-09	intronic	SORCS3	.
PC1	26:25211238	A	T	1.98713	0.354502	9.43883e-08	intronic	SORCS3	.
PC1	26:25216651	A	C	1.85927	0.362423	8.65411e-07	intronic	SORCS3	.
PC1	26:25225333	T	C	2.19546	0.392506	9.99536e-08	intronic	SORCS3	.
PC1	26:25461064	C	A	2.1309	0.402206	4.01203e-07	intronic	SORCS3	.
PC1	26:26018966	T	C	1.49853	0.277187	2.4251e-07	intronic	SORCS3	.
PC1	26:26273073	C	T	1.77031	0.315988	9.57432e-08	intergenic	SORCS3,TRNAA-AGC	dist\x3d90561\x3bdist\x3d211366
PC1	26:26273835	C	T	1.66431	0.316765	4.91371e-07	intergenic	SORCS3,TRNAA-AGC	dist\x3d91323\x3bdist\x3d210604
PC1	26:26424741	G	A	1.74646	0.333295	5.24248e-07	intergenic	SORCS3,TRNAA-AGC	dist\x3d242229\x3bdist\x3d59698
PC1	26:27030551	A	C	2.1209	0.337688	3.32631e-09	intergenic	TRNAA-AGC,SORCS1	dist\x3d546041\x3bdist\x3d524326
PC1	26:36478485	T	C	1.73775	0.321099	2.36116e-07	intronic	GFRA1	.
PC1	26:36499210	G	C	1.7489	0.331792	4.54369e-07	intronic	GFRA1	.
PC1	26:43306736	C	G	1.74845	0.334425	5.53365e-07	intergenic	BUB3,GPR26	dist\x3d346667\x3bdist\x3d112466
PC1	27:3235429	A	G	1.52801	0.284721	2.91663e-07	intronic	CSMD1	.
PC1	27:6704065	G	A	1.80303	0.331786	2.12547e-07	intergenic	DEFB7,DEFB1	dist\x3d25792\x3bdist\x3d17707
PC1	29:23027050	G	T	2.22155	0.357952	4.85866e-09	intergenic	ANO5,NELL1	dist\x3d385136\x3bdist\x3d228742
PC1	29:23036616	A	G	1.70524	0.328328	6.48051e-07	intergenic	ANO5,NELL1	dist\x3d394702\x3bdist\x3d219176
PC1	29:27500195	C	T	1.55655	0.2837	1.66118e-07	intergenic	LOC513062,LOC782009	dist\x3d6948\x3bdist\x3d2876
PC1	29:27510802	T	C	1.99721	0.377845	4.24526e-07	intronic	LOC526276	.
PC1	29:27539219	C	T	1.75699	0.342258	8.52146e-07	downstream	OR8G5	.
PC1	29:27543531	C	T	1.64168	0.317731	7.32287e-07	intergenic	OR8G5,LOC100301297	dist\x3d5303\x3bdist\x3d25584
PC1	29:27543532	A	G	1.64168	0.317731	7.32287e-07	intergenic	OR8G5,LOC100301297	dist\x3d5304\x3bdist\x3d25583
PC1	29:27715468	T	C	2.03124	0.393827	7.63598e-07	intergenic	LOC782544,LOC511657	dist\x3d4481\x3bdist\x3d12510
PC1	29:47707586	A	G	1.76003	0.340058	7.03572e-07	intronic	SHANK2	.
PC1	29:47712793	A	T	1.77838	0.342603	6.56748e-07	intronic	SHANK2	.
PC1	29:47716761	G	T	1.71326	0.333	8.09157e-07	intronic	SHANK2	.
PC1	29:47764510	C	T	1.73806	0.340297	9.58719e-07	intronic	SHANK2	.
